# Supplementary material
Source: publisher figshare collection journal article supplement (https://springernature.figshare.com/ndownloader/files/14002973)
Supplement: Supplementary file [file 14002973]

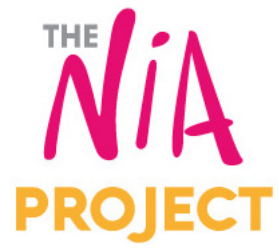

## **Baseline Survey Instruments**

ENGLISH

| SECTION 1: RESPONDENT'S BACKGROUND                   |                                                                                                                                          | QUESTIONS                                                                                                                                                                                                                                                                                                                                                                                                                                                                                                                                                                                                                                                                                                                                                                                                                                                                                                                                                                                                                                                                                                                                                                                                                                                                                                                                                                      | RESPONSES                                                                                                                        | SKIP TO |    |                 |   |   |               |   |   |                        |   |   |                                         |   |   |                                |   |   |                                                      |   |   |                |   |   |                            |   |   |                                                  |   |   |                                |   |   |                                     |   |   |                             |   |   |                       |   |   |                                         |   |   |                             |   |   |                        |   |   |                                         |   |   |                    |  |    |  |  |
|------------------------------------------------------|------------------------------------------------------------------------------------------------------------------------------------------|--------------------------------------------------------------------------------------------------------------------------------------------------------------------------------------------------------------------------------------------------------------------------------------------------------------------------------------------------------------------------------------------------------------------------------------------------------------------------------------------------------------------------------------------------------------------------------------------------------------------------------------------------------------------------------------------------------------------------------------------------------------------------------------------------------------------------------------------------------------------------------------------------------------------------------------------------------------------------------------------------------------------------------------------------------------------------------------------------------------------------------------------------------------------------------------------------------------------------------------------------------------------------------------------------------------------------------------------------------------------------------|----------------------------------------------------------------------------------------------------------------------------------|---------|----|-----------------|---|---|---------------|---|---|------------------------|---|---|-----------------------------------------|---|---|--------------------------------|---|---|------------------------------------------------------|---|---|----------------|---|---|----------------------------|---|---|--------------------------------------------------|---|---|--------------------------------|---|---|-------------------------------------|---|---|-----------------------------|---|---|-----------------------|---|---|-----------------------------------------|---|---|-----------------------------|---|---|------------------------|---|---|-----------------------------------------|---|---|--------------------|--|----|--|--|
| 101                                                  | [RECORD THE TIME INTERVIEW BEGINS<br>USE 24 HOUR TIME]                                                                                   | a. HOUR<br>[6-20]<br>b. MINUTES<br>[0-59]                                                                                                                                                                                                                                                                                                                                                                                                                                                                                                                                                                                                                                                                                                                                                                                                                                                                                                                                                                                                                                                                                                                                                                                                                                                                                                                                      | <table border="1"><tr><td></td><td></td></tr><tr><td></td><td></td></tr></table>                                                 |         |    |                 |   |   |               |   |   |                        |   |   |                                         |   |   |                                |   |   |                                                      |   |   |                |   |   |                            |   |   |                                                  |   |   |                                |   |   |                                     |   |   |                             |   |   |                       |   |   |                                         |   |   |                             |   |   |                        |   |   |                                         |   |   |                    |  |    |  |  |
|                                                      |                                                                                                                                          |                                                                                                                                                                                                                                                                                                                                                                                                                                                                                                                                                                                                                                                                                                                                                                                                                                                                                                                                                                                                                                                                                                                                                                                                                                                                                                                                                                                |                                                                                                                                  |         |    |                 |   |   |               |   |   |                        |   |   |                                         |   |   |                                |   |   |                                                      |   |   |                |   |   |                            |   |   |                                                  |   |   |                                |   |   |                                     |   |   |                             |   |   |                       |   |   |                                         |   |   |                             |   |   |                        |   |   |                                         |   |   |                    |  |    |  |  |
|                                                      |                                                                                                                                          |                                                                                                                                                                                                                                                                                                                                                                                                                                                                                                                                                                                                                                                                                                                                                                                                                                                                                                                                                                                                                                                                                                                                                                                                                                                                                                                                                                                |                                                                                                                                  |         |    |                 |   |   |               |   |   |                        |   |   |                                         |   |   |                                |   |   |                                                      |   |   |                |   |   |                            |   |   |                                                  |   |   |                                |   |   |                                     |   |   |                             |   |   |                       |   |   |                                         |   |   |                             |   |   |                        |   |   |                                         |   |   |                    |  |    |  |  |
| 102                                                  | In what month and year were you born?                                                                                                    | a. MONTH<br>[1-12]<br>DON'T KNOW MONTH<br>88<br>b. YEAR<br>[1996-2007]<br>DON'T KNOW YEAR<br>8888                                                                                                                                                                                                                                                                                                                                                                                                                                                                                                                                                                                                                                                                                                                                                                                                                                                                                                                                                                                                                                                                                                                                                                                                                                                                              | <table border="1"><tr><td></td><td></td></tr></table><br><table border="1"><tr><td></td><td></td><td></td><td></td></tr></table> |         |    |                 |   |   |               |   |   |                        |   |   |                                         |   |   |                                |   |   |                                                      |   |   |                |   |   |                            |   |   |                                                  |   |   |                                |   |   |                                     |   |   |                             |   |   |                       |   |   |                                         |   |   |                             |   |   |                        |   |   |                                         |   |   |                    |  |    |  |  |
|                                                      |                                                                                                                                          |                                                                                                                                                                                                                                                                                                                                                                                                                                                                                                                                                                                                                                                                                                                                                                                                                                                                                                                                                                                                                                                                                                                                                                                                                                                                                                                                                                                |                                                                                                                                  |         |    |                 |   |   |               |   |   |                        |   |   |                                         |   |   |                                |   |   |                                                      |   |   |                |   |   |                            |   |   |                                                  |   |   |                                |   |   |                                     |   |   |                             |   |   |                       |   |   |                                         |   |   |                             |   |   |                        |   |   |                                         |   |   |                    |  |    |  |  |
|                                                      |                                                                                                                                          |                                                                                                                                                                                                                                                                                                                                                                                                                                                                                                                                                                                                                                                                                                                                                                                                                                                                                                                                                                                                                                                                                                                                                                                                                                                                                                                                                                                |                                                                                                                                  |         |    |                 |   |   |               |   |   |                        |   |   |                                         |   |   |                                |   |   |                                                      |   |   |                |   |   |                            |   |   |                                                  |   |   |                                |   |   |                                     |   |   |                             |   |   |                       |   |   |                                         |   |   |                             |   |   |                        |   |   |                                         |   |   |                    |  |    |  |  |
| 103                                                  | How old were you on your last birthday?<br><br>[COMPARE AND CORRECT 102 AND/OR 103 IF INCONSISTENT]                                      | AGE IN COMPLETED YEARS<br>[10-20]                                                                                                                                                                                                                                                                                                                                                                                                                                                                                                                                                                                                                                                                                                                                                                                                                                                                                                                                                                                                                                                                                                                                                                                                                                                                                                                                              | <table border="1"><tr><td></td><td></td></tr></table>                                                                            |         |    |                 |   |   |               |   |   |                        |   |   |                                         |   |   |                                |   |   |                                                      |   |   |                |   |   |                            |   |   |                                                  |   |   |                                |   |   |                                     |   |   |                             |   |   |                       |   |   |                                         |   |   |                             |   |   |                        |   |   |                                         |   |   |                    |  |    |  |  |
|                                                      |                                                                                                                                          |                                                                                                                                                                                                                                                                                                                                                                                                                                                                                                                                                                                                                                                                                                                                                                                                                                                                                                                                                                                                                                                                                                                                                                                                                                                                                                                                                                                |                                                                                                                                  |         |    |                 |   |   |               |   |   |                        |   |   |                                         |   |   |                                |   |   |                                                      |   |   |                |   |   |                            |   |   |                                                  |   |   |                                |   |   |                                     |   |   |                             |   |   |                       |   |   |                                         |   |   |                             |   |   |                        |   |   |                                         |   |   |                    |  |    |  |  |
| 104                                                  | What class in school are you attending now?                                                                                              | STANDARD<br>[1-8]                                                                                                                                                                                                                                                                                                                                                                                                                                                                                                                                                                                                                                                                                                                                                                                                                                                                                                                                                                                                                                                                                                                                                                                                                                                                                                                                                              | <table border="1"><tr><td></td></tr></table>                                                                                     |         |    |                 |   |   |               |   |   |                        |   |   |                                         |   |   |                                |   |   |                                                      |   |   |                |   |   |                            |   |   |                                                  |   |   |                                |   |   |                                     |   |   |                             |   |   |                       |   |   |                                         |   |   |                             |   |   |                        |   |   |                                         |   |   |                    |  |    |  |  |
|                                                      |                                                                                                                                          |                                                                                                                                                                                                                                                                                                                                                                                                                                                                                                                                                                                                                                                                                                                                                                                                                                                                                                                                                                                                                                                                                                                                                                                                                                                                                                                                                                                |                                                                                                                                  |         |    |                 |   |   |               |   |   |                        |   |   |                                         |   |   |                                |   |   |                                                      |   |   |                |   |   |                            |   |   |                                                  |   |   |                                |   |   |                                     |   |   |                             |   |   |                       |   |   |                                         |   |   |                             |   |   |                        |   |   |                                         |   |   |                    |  |    |  |  |
|                                                      |                                                                                                                                          |                                                                                                                                                                                                                                                                                                                                                                                                                                                                                                                                                                                                                                                                                                                                                                                                                                                                                                                                                                                                                                                                                                                                                                                                                                                                                                                                                                                | IF NOT CLASS 7                                                                                                                   | END INT |    |                 |   |   |               |   |   |                        |   |   |                                         |   |   |                                |   |   |                                                      |   |   |                |   |   |                            |   |   |                                                  |   |   |                                |   |   |                                     |   |   |                             |   |   |                       |   |   |                                         |   |   |                             |   |   |                        |   |   |                                         |   |   |                    |  |    |  |  |
| 105                                                  | In which <b>county</b> were you born?<br><br>Note: Update with additional Countries from Pre-Test                                        | COUNTY CODE<br>[01-49]<br>BORN IN SOMALIA<br>66<br>BORN IN ETHIOPIA<br>77<br>DON'T KNOW<br>88<br>BORN IN OTHER COUNTRY<br>98<br>SPECIFY _____                                                                                                                                                                                                                                                                                                                                                                                                                                                                                                                                                                                                                                                                                                                                                                                                                                                                                                                                                                                                                                                                                                                                                                                                                                  | <table border="1"><tr><td></td><td></td></tr></table>                                                                            |         |    |                 |   |   |               |   |   |                        |   |   |                                         |   |   |                                |   |   |                                                      |   |   |                |   |   |                            |   |   |                                                  |   |   |                                |   |   |                                     |   |   |                             |   |   |                       |   |   |                                         |   |   |                             |   |   |                        |   |   |                                         |   |   |                    |  |    |  |  |
|                                                      |                                                                                                                                          |                                                                                                                                                                                                                                                                                                                                                                                                                                                                                                                                                                                                                                                                                                                                                                                                                                                                                                                                                                                                                                                                                                                                                                                                                                                                                                                                                                                |                                                                                                                                  |         |    |                 |   |   |               |   |   |                        |   |   |                                         |   |   |                                |   |   |                                                      |   |   |                |   |   |                            |   |   |                                                  |   |   |                                |   |   |                                     |   |   |                             |   |   |                       |   |   |                                         |   |   |                             |   |   |                        |   |   |                                         |   |   |                    |  |    |  |  |
| 106                                                  | What is the name of the place where you are currently living?<br><br>Note: Pre-populated list                                            | _____                                                                                                                                                                                                                                                                                                                                                                                                                                                                                                                                                                                                                                                                                                                                                                                                                                                                                                                                                                                                                                                                                                                                                                                                                                                                                                                                                                          |                                                                                                                                  |         |    |                 |   |   |               |   |   |                        |   |   |                                         |   |   |                                |   |   |                                                      |   |   |                |   |   |                            |   |   |                                                  |   |   |                                |   |   |                                     |   |   |                             |   |   |                       |   |   |                                         |   |   |                             |   |   |                        |   |   |                                         |   |   |                    |  |    |  |  |
| 107                                                  | How long have you been living continuously in [name of current place of residence]?<br><br>[IF LESS THAN ONE YEAR, RECORD '0' YEARS]     | YEARS<br>[0- 20]<br>ALWAYS (SINCE BIRTH)<br>DON'T KNOW                                                                                                                                                                                                                                                                                                                                                                                                                                                                                                                                                                                                                                                                                                                                                                                                                                                                                                                                                                                                                                                                                                                                                                                                                                                                                                                         | <table border="1"><tr><td></td><td></td></tr></table><br>77<br>88                                                                |         |    | 109             |   |   |               |   |   |                        |   |   |                                         |   |   |                                |   |   |                                                      |   |   |                |   |   |                            |   |   |                                                  |   |   |                                |   |   |                                     |   |   |                             |   |   |                       |   |   |                                         |   |   |                             |   |   |                        |   |   |                                         |   |   |                    |  |    |  |  |
|                                                      |                                                                                                                                          |                                                                                                                                                                                                                                                                                                                                                                                                                                                                                                                                                                                                                                                                                                                                                                                                                                                                                                                                                                                                                                                                                                                                                                                                                                                                                                                                                                                |                                                                                                                                  |         |    |                 |   |   |               |   |   |                        |   |   |                                         |   |   |                                |   |   |                                                      |   |   |                |   |   |                            |   |   |                                                  |   |   |                                |   |   |                                     |   |   |                             |   |   |                       |   |   |                                         |   |   |                             |   |   |                        |   |   |                                         |   |   |                    |  |    |  |  |
| 108                                                  | Think about the place where you lived just before you moved here. Was it a city, a town, or a village?                                   | TOWN / URBAN AREA<br>1<br>VILLAGE / RURAL AREA<br>2                                                                                                                                                                                                                                                                                                                                                                                                                                                                                                                                                                                                                                                                                                                                                                                                                                                                                                                                                                                                                                                                                                                                                                                                                                                                                                                            |                                                                                                                                  |         |    |                 |   |   |               |   |   |                        |   |   |                                         |   |   |                                |   |   |                                                      |   |   |                |   |   |                            |   |   |                                                  |   |   |                                |   |   |                                     |   |   |                             |   |   |                       |   |   |                                         |   |   |                             |   |   |                        |   |   |                                         |   |   |                    |  |    |  |  |
| 109                                                  | In the last one year, on how many separate occasions have you traveled away from your home community and slept away?                     | NUMBER OF TRIPS<br>[1-80]<br>NONE<br>DON'T KNOW                                                                                                                                                                                                                                                                                                                                                                                                                                                                                                                                                                                                                                                                                                                                                                                                                                                                                                                                                                                                                                                                                                                                                                                                                                                                                                                                | <table border="1"><tr><td></td><td></td></tr></table><br>0<br>88                                                                 |         |    | 110             |   |   |               |   |   |                        |   |   |                                         |   |   |                                |   |   |                                                      |   |   |                |   |   |                            |   |   |                                                  |   |   |                                |   |   |                                     |   |   |                             |   |   |                       |   |   |                                         |   |   |                             |   |   |                        |   |   |                                         |   |   |                    |  |    |  |  |
|                                                      |                                                                                                                                          |                                                                                                                                                                                                                                                                                                                                                                                                                                                                                                                                                                                                                                                                                                                                                                                                                                                                                                                                                                                                                                                                                                                                                                                                                                                                                                                                                                                |                                                                                                                                  |         |    |                 |   |   |               |   |   |                        |   |   |                                         |   |   |                                |   |   |                                                      |   |   |                |   |   |                            |   |   |                                                  |   |   |                                |   |   |                                     |   |   |                             |   |   |                       |   |   |                                         |   |   |                             |   |   |                        |   |   |                                         |   |   |                    |  |    |  |  |
|                                                      | a. In the previous school term (between September and October last year), how many days in total were you away from your home community? | NUMBER OF DAYS<br>[1-70]<br>NONE                                                                                                                                                                                                                                                                                                                                                                                                                                                                                                                                                                                                                                                                                                                                                                                                                                                                                                                                                                                                                                                                                                                                                                                                                                                                                                                                               | <table border="1"><tr><td></td><td></td></tr></table>                                                                            |         |    | 110             |   |   |               |   |   |                        |   |   |                                         |   |   |                                |   |   |                                                      |   |   |                |   |   |                            |   |   |                                                  |   |   |                                |   |   |                                     |   |   |                             |   |   |                       |   |   |                                         |   |   |                             |   |   |                        |   |   |                                         |   |   |                    |  |    |  |  |
|                                                      |                                                                                                                                          |                                                                                                                                                                                                                                                                                                                                                                                                                                                                                                                                                                                                                                                                                                                                                                                                                                                                                                                                                                                                                                                                                                                                                                                                                                                                                                                                                                                |                                                                                                                                  |         |    |                 |   |   |               |   |   |                        |   |   |                                         |   |   |                                |   |   |                                                      |   |   |                |   |   |                            |   |   |                                                  |   |   |                                |   |   |                                     |   |   |                             |   |   |                       |   |   |                                         |   |   |                             |   |   |                        |   |   |                                         |   |   |                    |  |    |  |  |
|                                                      | b. What were the reasons you were away for the days you just mentioned?<br><br>[READ ALL OPTIONS]                                        | <table border="1"> <thead> <tr> <th></th> <th>YES</th> <th>NO</th> </tr> </thead> <tbody> <tr><td>a. For marriage</td><td>1</td><td>2</td></tr> <tr><td>b. For school</td><td>1</td><td>2</td></tr> <tr><td>c. For medical reasons</td><td>1</td><td>2</td></tr> <tr><td>d. Could not afford to live where I was</td><td>1</td><td>2</td></tr> <tr><td>e. Accompanying family members</td><td>1</td><td>2</td></tr> <tr><td>f. Personal problems at home (family dispute, abuse)</td><td>1</td><td>2</td></tr> <tr><td>g. Go for work</td><td>1</td><td>2</td></tr> <tr><td>h. Escaping early marriage</td><td>1</td><td>2</td></tr> <tr><td>i. Separation or divorce from husband or partner</td><td>1</td><td>2</td></tr> <tr><td>j. Death of parent(s)/guardian</td><td>1</td><td>2</td></tr> <tr><td>k. Separation or divorce of parents</td><td>1</td><td>2</td></tr> <tr><td>l. Death of husband/partner</td><td>1</td><td>2</td></tr> <tr><td>m. Political violence</td><td>1</td><td>2</td></tr> <tr><td>n. Famine or poverty in the other place</td><td>1</td><td>2</td></tr> <tr><td>o. Stigma due to HIV status</td><td>1</td><td>2</td></tr> <tr><td>p. Lack of school fees</td><td>1</td><td>2</td></tr> <tr><td>q. Other forms of stigma/discrimination</td><td>1</td><td>2</td></tr> <tr><td>r. Other (SPECIFY)</td><td></td><td>98</td></tr> </tbody> </table> |                                                                                                                                  | YES     | NO | a. For marriage | 1 | 2 | b. For school | 1 | 2 | c. For medical reasons | 1 | 2 | d. Could not afford to live where I was | 1 | 2 | e. Accompanying family members | 1 | 2 | f. Personal problems at home (family dispute, abuse) | 1 | 2 | g. Go for work | 1 | 2 | h. Escaping early marriage | 1 | 2 | i. Separation or divorce from husband or partner | 1 | 2 | j. Death of parent(s)/guardian | 1 | 2 | k. Separation or divorce of parents | 1 | 2 | l. Death of husband/partner | 1 | 2 | m. Political violence | 1 | 2 | n. Famine or poverty in the other place | 1 | 2 | o. Stigma due to HIV status | 1 | 2 | p. Lack of school fees | 1 | 2 | q. Other forms of stigma/discrimination | 1 | 2 | r. Other (SPECIFY) |  | 98 |  |  |
|                                                      | YES                                                                                                                                      | NO                                                                                                                                                                                                                                                                                                                                                                                                                                                                                                                                                                                                                                                                                                                                                                                                                                                                                                                                                                                                                                                                                                                                                                                                                                                                                                                                                                             |                                                                                                                                  |         |    |                 |   |   |               |   |   |                        |   |   |                                         |   |   |                                |   |   |                                                      |   |   |                |   |   |                            |   |   |                                                  |   |   |                                |   |   |                                     |   |   |                             |   |   |                       |   |   |                                         |   |   |                             |   |   |                        |   |   |                                         |   |   |                    |  |    |  |  |
| a. For marriage                                      | 1                                                                                                                                        | 2                                                                                                                                                                                                                                                                                                                                                                                                                                                                                                                                                                                                                                                                                                                                                                                                                                                                                                                                                                                                                                                                                                                                                                                                                                                                                                                                                                              |                                                                                                                                  |         |    |                 |   |   |               |   |   |                        |   |   |                                         |   |   |                                |   |   |                                                      |   |   |                |   |   |                            |   |   |                                                  |   |   |                                |   |   |                                     |   |   |                             |   |   |                       |   |   |                                         |   |   |                             |   |   |                        |   |   |                                         |   |   |                    |  |    |  |  |
| b. For school                                        | 1                                                                                                                                        | 2                                                                                                                                                                                                                                                                                                                                                                                                                                                                                                                                                                                                                                                                                                                                                                                                                                                                                                                                                                                                                                                                                                                                                                                                                                                                                                                                                                              |                                                                                                                                  |         |    |                 |   |   |               |   |   |                        |   |   |                                         |   |   |                                |   |   |                                                      |   |   |                |   |   |                            |   |   |                                                  |   |   |                                |   |   |                                     |   |   |                             |   |   |                       |   |   |                                         |   |   |                             |   |   |                        |   |   |                                         |   |   |                    |  |    |  |  |
| c. For medical reasons                               | 1                                                                                                                                        | 2                                                                                                                                                                                                                                                                                                                                                                                                                                                                                                                                                                                                                                                                                                                                                                                                                                                                                                                                                                                                                                                                                                                                                                                                                                                                                                                                                                              |                                                                                                                                  |         |    |                 |   |   |               |   |   |                        |   |   |                                         |   |   |                                |   |   |                                                      |   |   |                |   |   |                            |   |   |                                                  |   |   |                                |   |   |                                     |   |   |                             |   |   |                       |   |   |                                         |   |   |                             |   |   |                        |   |   |                                         |   |   |                    |  |    |  |  |
| d. Could not afford to live where I was              | 1                                                                                                                                        | 2                                                                                                                                                                                                                                                                                                                                                                                                                                                                                                                                                                                                                                                                                                                                                                                                                                                                                                                                                                                                                                                                                                                                                                                                                                                                                                                                                                              |                                                                                                                                  |         |    |                 |   |   |               |   |   |                        |   |   |                                         |   |   |                                |   |   |                                                      |   |   |                |   |   |                            |   |   |                                                  |   |   |                                |   |   |                                     |   |   |                             |   |   |                       |   |   |                                         |   |   |                             |   |   |                        |   |   |                                         |   |   |                    |  |    |  |  |
| e. Accompanying family members                       | 1                                                                                                                                        | 2                                                                                                                                                                                                                                                                                                                                                                                                                                                                                                                                                                                                                                                                                                                                                                                                                                                                                                                                                                                                                                                                                                                                                                                                                                                                                                                                                                              |                                                                                                                                  |         |    |                 |   |   |               |   |   |                        |   |   |                                         |   |   |                                |   |   |                                                      |   |   |                |   |   |                            |   |   |                                                  |   |   |                                |   |   |                                     |   |   |                             |   |   |                       |   |   |                                         |   |   |                             |   |   |                        |   |   |                                         |   |   |                    |  |    |  |  |
| f. Personal problems at home (family dispute, abuse) | 1                                                                                                                                        | 2                                                                                                                                                                                                                                                                                                                                                                                                                                                                                                                                                                                                                                                                                                                                                                                                                                                                                                                                                                                                                                                                                                                                                                                                                                                                                                                                                                              |                                                                                                                                  |         |    |                 |   |   |               |   |   |                        |   |   |                                         |   |   |                                |   |   |                                                      |   |   |                |   |   |                            |   |   |                                                  |   |   |                                |   |   |                                     |   |   |                             |   |   |                       |   |   |                                         |   |   |                             |   |   |                        |   |   |                                         |   |   |                    |  |    |  |  |
| g. Go for work                                       | 1                                                                                                                                        | 2                                                                                                                                                                                                                                                                                                                                                                                                                                                                                                                                                                                                                                                                                                                                                                                                                                                                                                                                                                                                                                                                                                                                                                                                                                                                                                                                                                              |                                                                                                                                  |         |    |                 |   |   |               |   |   |                        |   |   |                                         |   |   |                                |   |   |                                                      |   |   |                |   |   |                            |   |   |                                                  |   |   |                                |   |   |                                     |   |   |                             |   |   |                       |   |   |                                         |   |   |                             |   |   |                        |   |   |                                         |   |   |                    |  |    |  |  |
| h. Escaping early marriage                           | 1                                                                                                                                        | 2                                                                                                                                                                                                                                                                                                                                                                                                                                                                                                                                                                                                                                                                                                                                                                                                                                                                                                                                                                                                                                                                                                                                                                                                                                                                                                                                                                              |                                                                                                                                  |         |    |                 |   |   |               |   |   |                        |   |   |                                         |   |   |                                |   |   |                                                      |   |   |                |   |   |                            |   |   |                                                  |   |   |                                |   |   |                                     |   |   |                             |   |   |                       |   |   |                                         |   |   |                             |   |   |                        |   |   |                                         |   |   |                    |  |    |  |  |
| i. Separation or divorce from husband or partner     | 1                                                                                                                                        | 2                                                                                                                                                                                                                                                                                                                                                                                                                                                                                                                                                                                                                                                                                                                                                                                                                                                                                                                                                                                                                                                                                                                                                                                                                                                                                                                                                                              |                                                                                                                                  |         |    |                 |   |   |               |   |   |                        |   |   |                                         |   |   |                                |   |   |                                                      |   |   |                |   |   |                            |   |   |                                                  |   |   |                                |   |   |                                     |   |   |                             |   |   |                       |   |   |                                         |   |   |                             |   |   |                        |   |   |                                         |   |   |                    |  |    |  |  |
| j. Death of parent(s)/guardian                       | 1                                                                                                                                        | 2                                                                                                                                                                                                                                                                                                                                                                                                                                                                                                                                                                                                                                                                                                                                                                                                                                                                                                                                                                                                                                                                                                                                                                                                                                                                                                                                                                              |                                                                                                                                  |         |    |                 |   |   |               |   |   |                        |   |   |                                         |   |   |                                |   |   |                                                      |   |   |                |   |   |                            |   |   |                                                  |   |   |                                |   |   |                                     |   |   |                             |   |   |                       |   |   |                                         |   |   |                             |   |   |                        |   |   |                                         |   |   |                    |  |    |  |  |
| k. Separation or divorce of parents                  | 1                                                                                                                                        | 2                                                                                                                                                                                                                                                                                                                                                                                                                                                                                                                                                                                                                                                                                                                                                                                                                                                                                                                                                                                                                                                                                                                                                                                                                                                                                                                                                                              |                                                                                                                                  |         |    |                 |   |   |               |   |   |                        |   |   |                                         |   |   |                                |   |   |                                                      |   |   |                |   |   |                            |   |   |                                                  |   |   |                                |   |   |                                     |   |   |                             |   |   |                       |   |   |                                         |   |   |                             |   |   |                        |   |   |                                         |   |   |                    |  |    |  |  |
| l. Death of husband/partner                          | 1                                                                                                                                        | 2                                                                                                                                                                                                                                                                                                                                                                                                                                                                                                                                                                                                                                                                                                                                                                                                                                                                                                                                                                                                                                                                                                                                                                                                                                                                                                                                                                              |                                                                                                                                  |         |    |                 |   |   |               |   |   |                        |   |   |                                         |   |   |                                |   |   |                                                      |   |   |                |   |   |                            |   |   |                                                  |   |   |                                |   |   |                                     |   |   |                             |   |   |                       |   |   |                                         |   |   |                             |   |   |                        |   |   |                                         |   |   |                    |  |    |  |  |
| m. Political violence                                | 1                                                                                                                                        | 2                                                                                                                                                                                                                                                                                                                                                                                                                                                                                                                                                                                                                                                                                                                                                                                                                                                                                                                                                                                                                                                                                                                                                                                                                                                                                                                                                                              |                                                                                                                                  |         |    |                 |   |   |               |   |   |                        |   |   |                                         |   |   |                                |   |   |                                                      |   |   |                |   |   |                            |   |   |                                                  |   |   |                                |   |   |                                     |   |   |                             |   |   |                       |   |   |                                         |   |   |                             |   |   |                        |   |   |                                         |   |   |                    |  |    |  |  |
| n. Famine or poverty in the other place              | 1                                                                                                                                        | 2                                                                                                                                                                                                                                                                                                                                                                                                                                                                                                                                                                                                                                                                                                                                                                                                                                                                                                                                                                                                                                                                                                                                                                                                                                                                                                                                                                              |                                                                                                                                  |         |    |                 |   |   |               |   |   |                        |   |   |                                         |   |   |                                |   |   |                                                      |   |   |                |   |   |                            |   |   |                                                  |   |   |                                |   |   |                                     |   |   |                             |   |   |                       |   |   |                                         |   |   |                             |   |   |                        |   |   |                                         |   |   |                    |  |    |  |  |
| o. Stigma due to HIV status                          | 1                                                                                                                                        | 2                                                                                                                                                                                                                                                                                                                                                                                                                                                                                                                                                                                                                                                                                                                                                                                                                                                                                                                                                                                                                                                                                                                                                                                                                                                                                                                                                                              |                                                                                                                                  |         |    |                 |   |   |               |   |   |                        |   |   |                                         |   |   |                                |   |   |                                                      |   |   |                |   |   |                            |   |   |                                                  |   |   |                                |   |   |                                     |   |   |                             |   |   |                       |   |   |                                         |   |   |                             |   |   |                        |   |   |                                         |   |   |                    |  |    |  |  |
| p. Lack of school fees                               | 1                                                                                                                                        | 2                                                                                                                                                                                                                                                                                                                                                                                                                                                                                                                                                                                                                                                                                                                                                                                                                                                                                                                                                                                                                                                                                                                                                                                                                                                                                                                                                                              |                                                                                                                                  |         |    |                 |   |   |               |   |   |                        |   |   |                                         |   |   |                                |   |   |                                                      |   |   |                |   |   |                            |   |   |                                                  |   |   |                                |   |   |                                     |   |   |                             |   |   |                       |   |   |                                         |   |   |                             |   |   |                        |   |   |                                         |   |   |                    |  |    |  |  |
| q. Other forms of stigma/discrimination              | 1                                                                                                                                        | 2                                                                                                                                                                                                                                                                                                                                                                                                                                                                                                                                                                                                                                                                                                                                                                                                                                                                                                                                                                                                                                                                                                                                                                                                                                                                                                                                                                              |                                                                                                                                  |         |    |                 |   |   |               |   |   |                        |   |   |                                         |   |   |                                |   |   |                                                      |   |   |                |   |   |                            |   |   |                                                  |   |   |                                |   |   |                                     |   |   |                             |   |   |                       |   |   |                                         |   |   |                             |   |   |                        |   |   |                                         |   |   |                    |  |    |  |  |
| r. Other (SPECIFY)                                   |                                                                                                                                          | 98                                                                                                                                                                                                                                                                                                                                                                                                                                                                                                                                                                                                                                                                                                                                                                                                                                                                                                                                                                                                                                                                                                                                                                                                                                                                                                                                                                             |                                                                                                                                  |         |    |                 |   |   |               |   |   |                        |   |   |                                         |   |   |                                |   |   |                                                      |   |   |                |   |   |                            |   |   |                                                  |   |   |                                |   |   |                                     |   |   |                             |   |   |                       |   |   |                                         |   |   |                             |   |   |                        |   |   |                                         |   |   |                    |  |    |  |  |
| 110                                                  |                                                                                                                                          | YES                                                                                                                                                                                                                                                                                                                                                                                                                                                                                                                                                                                                                                                                                                                                                                                                                                                                                                                                                                                                                                                                                                                                                                                                                                                                                                                                                                            | 1                                                                                                                                | 112     |    |                 |   |   |               |   |   |                        |   |   |                                         |   |   |                                |   |   |                                                      |   |   |                |   |   |                            |   |   |                                                  |   |   |                                |   |   |                                     |   |   |                             |   |   |                       |   |   |                                         |   |   |                             |   |   |                        |   |   |                                         |   |   |                    |  |    |  |  |

|     |                                                                                                                              |                                                                                                                                                                                                                                                                                                                                                                                                                                      |  |            |     |
|-----|------------------------------------------------------------------------------------------------------------------------------|--------------------------------------------------------------------------------------------------------------------------------------------------------------------------------------------------------------------------------------------------------------------------------------------------------------------------------------------------------------------------------------------------------------------------------------|--|------------|-----|
|     | Is your mother alive?                                                                                                        | NO 2<br>DON'T KNOW 88                                                                                                                                                                                                                                                                                                                                                                                                                |  | 112        |     |
| 111 | How old were you when your mother died?                                                                                      | AGE IN YEARS <input type="text"/><br><br>DONT KNOW 88                                                                                                                                                                                                                                                                                                                                                                                |  |            | 111 |
| 112 | What is the highest level of education your mother completed?                                                                | NO EDUCATION 1<br>NURSERY SCHOOL 2<br>SOME PRIMARY SCHOOL 3<br>COMPLETED PRIMARY SCHOOL 4<br>SOME SECONDARY SCHOOL 5<br>COMPLETED SECONDARY SCHOOL 6<br>PRE-SECONDARY SCHOOL VOCATIONAL/TECHNICAL TRAINING 7<br>POST- SECONDARY SCHOOL VOCATIONAL/TECHNICAL TRAINING 8<br>COLLEGE/UNIVERSITY 9<br>DON'T KNOW 88                                                                                                                      |  |            | 112 |
| 113 | Is your father alive?                                                                                                        | YES 1<br>NO 2<br>DON'T KNOW 88                                                                                                                                                                                                                                                                                                                                                                                                       |  | 115<br>115 | 113 |
| 114 | How old were you when your father died?                                                                                      | AGE IN YEARS <input type="text"/><br><br>DONT KNOW 88                                                                                                                                                                                                                                                                                                                                                                                |  |            | 114 |
| 115 | What is the highest level of education your father completed?                                                                | NO EDUCATION 1<br>NURSERY SCHOOL 2<br>SOME PRIMARY SCHOOL 3<br>COMPLETED PRIMARY SCHOOL 4<br>SOME SECONDARY SCHOOL 5<br>COMPLETED SECONDARY SCHOOL 6<br>PRE-SECONDARY SCHOOL VOCATIONAL/TECHNICAL TRAINING 7<br>POST- SECONDARY SCHOOL VOCATIONAL/TECHNICAL TRAINING 8<br>COLLEGE/UNIVERSITY 9<br>DON'T KNOW 88                                                                                                                      |  |            | 115 |
| 116 | What is your ethnic group?<br><br>[RECORD ALL MENTIONED]                                                                     | YES NO<br>EMBU 1 2<br>KALENJIN 1 2<br>KAMBA 1 2<br>KIKUYU 1 2<br>KISII 1 2<br>LUHYA 1 2<br>LUO 1 2<br>MASAI 1 2<br>MERU 1 2<br>MIJIKENDA/SWAHILI 1 2<br>SOMALI 1 2<br>BORANA 1 2<br>TAITA/TAVETA 1 2<br>NUBIAN 1 2<br>OTHER 1 2<br><br>_____ SPECIFY                                                                                                                                                                                 |  |            | 116 |
| 117 | What language(s) do you speak at home?<br><br>[RECORD ALL MENTIONED]<br><br>Note: Update with additional Mijikenda languages | YES NO<br>a. EMBU 1 2<br>b. KALENJIN 1 2<br>c. KAMBA 1 2<br>d. KIKUYU 1 2<br>e. KISII 1 2<br>f. LUHYA 1 2<br>g. LUO 1 2<br>h. MASAI 1 2<br>i. MERU 1 2<br>j. GIRIAMA 1 2<br>k. SOMALI 1 2<br>l. KIBORANA 1 2<br>m. KISWAHILI 1 2<br>n. ENGLISH 1 2<br>o. NUBIAN 1 2<br>p. CHONYI 1 2<br>q. RABAI 1 2<br>r. DURUMA 1 2<br>s. KAUMA 1 2<br>t. DIGO 1 2<br>u. KAMBE 1 2<br>v. JIBANA 1 2<br>w. RIBE 1 2<br>x. OTHER (SPECIFY) _____ 1 2 |  |            | 117 |
| 118 | Can you speak any other languages well enough to have a conversation? [IF YES, ASK:] Which ones?                             | YES NO<br>a. EMBU 1 2<br>b. KALENJIN 1 2                                                                                                                                                                                                                                                                                                                                                                                             |  |            | 118 |

|                                                                                                                                                                                                                                                                                                                                                                         | <p>[RECORD ALL MENTIONED]</p> <p>Add Mijikenda option</p>                                                                                                                                                                                                                                                                                                                                                                                                                                                                                                                                                                                                                                                                                                                                                                                                                                                                                 | <table style="width:100%; border: none;"> <tr><td>c.</td><td>KAMBA</td><td style="text-align: right;">1</td><td style="text-align: right;">2</td></tr> <tr><td>d.</td><td>KIKUYU</td><td style="text-align: right;">1</td><td style="text-align: right;">2</td></tr> <tr><td>e.</td><td>KISII</td><td style="text-align: right;">1</td><td style="text-align: right;">2</td></tr> <tr><td>f.</td><td>LUHYA</td><td style="text-align: right;">1</td><td style="text-align: right;">2</td></tr> <tr><td>g.</td><td>LUO</td><td style="text-align: right;">1</td><td style="text-align: right;">2</td></tr> <tr><td>h.</td><td>MASAI</td><td style="text-align: right;">1</td><td style="text-align: right;">2</td></tr> <tr><td>i.</td><td>MERU</td><td style="text-align: right;">1</td><td style="text-align: right;">2</td></tr> <tr><td>j.</td><td>GIRIAMA</td><td style="text-align: right;">1</td><td style="text-align: right;">2</td></tr> <tr><td>k.</td><td>SOMALI</td><td style="text-align: right;">1</td><td style="text-align: right;">2</td></tr> <tr><td>l.</td><td>KIBORANA</td><td style="text-align: right;">1</td><td style="text-align: right;">2</td></tr> <tr><td>m.</td><td>KISWAHILI</td><td style="text-align: right;">1</td><td style="text-align: right;">2</td></tr> <tr><td>n.</td><td>ENGLISH</td><td style="text-align: right;">1</td><td style="text-align: right;">2</td></tr> <tr><td>o.</td><td>NUBIAN</td><td style="text-align: right;">1</td><td style="text-align: right;">2</td></tr> <tr><td>p.</td><td>CHONYI</td><td style="text-align: right;">1</td><td style="text-align: right;">2</td></tr> <tr><td>q.</td><td>RABAI</td><td style="text-align: right;">1</td><td style="text-align: right;">2</td></tr> <tr><td>r.</td><td>DURUMA</td><td style="text-align: right;">1</td><td style="text-align: right;">2</td></tr> <tr><td>s.</td><td>KAUMA</td><td style="text-align: right;">1</td><td style="text-align: right;">2</td></tr> <tr><td>t.</td><td>DIGO</td><td style="text-align: right;">1</td><td style="text-align: right;">2</td></tr> <tr><td>u.</td><td>KAMBE</td><td style="text-align: right;">1</td><td style="text-align: right;">2</td></tr> <tr><td>v.</td><td>JIBANA</td><td style="text-align: right;">1</td><td style="text-align: right;">2</td></tr> <tr><td>w.</td><td>RIBE</td><td style="text-align: right;">1</td><td style="text-align: right;">2</td></tr> <tr><td>p.</td><td>OTHER SPECIFY</td><td style="text-align: right;">1</td><td style="text-align: right;">2</td></tr> </table> | c.                | KAMBA                                                                                                                                                                                                                                                                                                                                                                                                                                                                                                                                                                                                                                                                                                                                                                                                                                                | 1                               | 2                                 | d.                                                               | KIKUYU   | 1           | 2        | e.          | KISII         | 1                     | 2                          | f.                              | LUHYA                             | 1                                                                | 2             | g.          | LUO               | 1               | 2 | h.                   | MASAI                             | 1                 | 2      | i. | MERU | 1 | 2 | j. | GIRIAMA | 1 | 2 | k. | SOMALI | 1 | 2 | l. | KIBORANA | 1 | 2 | m. | KISWAHILI | 1 | 2 | n. | ENGLISH | 1 | 2 | o. | NUBIAN | 1 | 2 | p. | CHONYI | 1 | 2 | q. | RABAI | 1 | 2 | r. | DURUMA | 1 | 2 | s. | KAUMA | 1 | 2 | t. | DIGO | 1 | 2 | u. | KAMBE | 1 | 2 | v. | JIBANA | 1 | 2 | w. | RIBE | 1 | 2 | p. | OTHER SPECIFY | 1 | 2 |  |
|-------------------------------------------------------------------------------------------------------------------------------------------------------------------------------------------------------------------------------------------------------------------------------------------------------------------------------------------------------------------------|-------------------------------------------------------------------------------------------------------------------------------------------------------------------------------------------------------------------------------------------------------------------------------------------------------------------------------------------------------------------------------------------------------------------------------------------------------------------------------------------------------------------------------------------------------------------------------------------------------------------------------------------------------------------------------------------------------------------------------------------------------------------------------------------------------------------------------------------------------------------------------------------------------------------------------------------|----------------------------------------------------------------------------------------------------------------------------------------------------------------------------------------------------------------------------------------------------------------------------------------------------------------------------------------------------------------------------------------------------------------------------------------------------------------------------------------------------------------------------------------------------------------------------------------------------------------------------------------------------------------------------------------------------------------------------------------------------------------------------------------------------------------------------------------------------------------------------------------------------------------------------------------------------------------------------------------------------------------------------------------------------------------------------------------------------------------------------------------------------------------------------------------------------------------------------------------------------------------------------------------------------------------------------------------------------------------------------------------------------------------------------------------------------------------------------------------------------------------------------------------------------------------------------------------------------------------------------------------------------------------------------------------------------------------------------------------------------------------------------------------------------------------------------------------------------------------------------------------------------------------------------------------------------------------------------------------------------------------------------------------------------------------------------------------------------------------------------------------------------------------------------------------------------------------------------------------------------------------------------------------------------------------------------------------------------------------------------------------------------------------------------------------------------------------------------------------------------------------------------------------------------------------------|-------------------|------------------------------------------------------------------------------------------------------------------------------------------------------------------------------------------------------------------------------------------------------------------------------------------------------------------------------------------------------------------------------------------------------------------------------------------------------------------------------------------------------------------------------------------------------------------------------------------------------------------------------------------------------------------------------------------------------------------------------------------------------------------------------------------------------------------------------------------------------|---------------------------------|-----------------------------------|------------------------------------------------------------------|----------|-------------|----------|-------------|---------------|-----------------------|----------------------------|---------------------------------|-----------------------------------|------------------------------------------------------------------|---------------|-------------|-------------------|-----------------|---|----------------------|-----------------------------------|-------------------|--------|----|------|---|---|----|---------|---|---|----|--------|---|---|----|----------|---|---|----|-----------|---|---|----|---------|---|---|----|--------|---|---|----|--------|---|---|----|-------|---|---|----|--------|---|---|----|-------|---|---|----|------|---|---|----|-------|---|---|----|--------|---|---|----|------|---|---|----|---------------|---|---|--|
| c.                                                                                                                                                                                                                                                                                                                                                                      | KAMBA                                                                                                                                                                                                                                                                                                                                                                                                                                                                                                                                                                                                                                                                                                                                                                                                                                                                                                                                     | 1                                                                                                                                                                                                                                                                                                                                                                                                                                                                                                                                                                                                                                                                                                                                                                                                                                                                                                                                                                                                                                                                                                                                                                                                                                                                                                                                                                                                                                                                                                                                                                                                                                                                                                                                                                                                                                                                                                                                                                                                                                                                                                                                                                                                                                                                                                                                                                                                                                                                                                                                                                    | 2                 |                                                                                                                                                                                                                                                                                                                                                                                                                                                                                                                                                                                                                                                                                                                                                                                                                                                      |                                 |                                   |                                                                  |          |             |          |             |               |                       |                            |                                 |                                   |                                                                  |               |             |                   |                 |   |                      |                                   |                   |        |    |      |   |   |    |         |   |   |    |        |   |   |    |          |   |   |    |           |   |   |    |         |   |   |    |        |   |   |    |        |   |   |    |       |   |   |    |        |   |   |    |       |   |   |    |      |   |   |    |       |   |   |    |        |   |   |    |      |   |   |    |               |   |   |  |
| d.                                                                                                                                                                                                                                                                                                                                                                      | KIKUYU                                                                                                                                                                                                                                                                                                                                                                                                                                                                                                                                                                                                                                                                                                                                                                                                                                                                                                                                    | 1                                                                                                                                                                                                                                                                                                                                                                                                                                                                                                                                                                                                                                                                                                                                                                                                                                                                                                                                                                                                                                                                                                                                                                                                                                                                                                                                                                                                                                                                                                                                                                                                                                                                                                                                                                                                                                                                                                                                                                                                                                                                                                                                                                                                                                                                                                                                                                                                                                                                                                                                                                    | 2                 |                                                                                                                                                                                                                                                                                                                                                                                                                                                                                                                                                                                                                                                                                                                                                                                                                                                      |                                 |                                   |                                                                  |          |             |          |             |               |                       |                            |                                 |                                   |                                                                  |               |             |                   |                 |   |                      |                                   |                   |        |    |      |   |   |    |         |   |   |    |        |   |   |    |          |   |   |    |           |   |   |    |         |   |   |    |        |   |   |    |        |   |   |    |       |   |   |    |        |   |   |    |       |   |   |    |      |   |   |    |       |   |   |    |        |   |   |    |      |   |   |    |               |   |   |  |
| e.                                                                                                                                                                                                                                                                                                                                                                      | KISII                                                                                                                                                                                                                                                                                                                                                                                                                                                                                                                                                                                                                                                                                                                                                                                                                                                                                                                                     | 1                                                                                                                                                                                                                                                                                                                                                                                                                                                                                                                                                                                                                                                                                                                                                                                                                                                                                                                                                                                                                                                                                                                                                                                                                                                                                                                                                                                                                                                                                                                                                                                                                                                                                                                                                                                                                                                                                                                                                                                                                                                                                                                                                                                                                                                                                                                                                                                                                                                                                                                                                                    | 2                 |                                                                                                                                                                                                                                                                                                                                                                                                                                                                                                                                                                                                                                                                                                                                                                                                                                                      |                                 |                                   |                                                                  |          |             |          |             |               |                       |                            |                                 |                                   |                                                                  |               |             |                   |                 |   |                      |                                   |                   |        |    |      |   |   |    |         |   |   |    |        |   |   |    |          |   |   |    |           |   |   |    |         |   |   |    |        |   |   |    |        |   |   |    |       |   |   |    |        |   |   |    |       |   |   |    |      |   |   |    |       |   |   |    |        |   |   |    |      |   |   |    |               |   |   |  |
| f.                                                                                                                                                                                                                                                                                                                                                                      | LUHYA                                                                                                                                                                                                                                                                                                                                                                                                                                                                                                                                                                                                                                                                                                                                                                                                                                                                                                                                     | 1                                                                                                                                                                                                                                                                                                                                                                                                                                                                                                                                                                                                                                                                                                                                                                                                                                                                                                                                                                                                                                                                                                                                                                                                                                                                                                                                                                                                                                                                                                                                                                                                                                                                                                                                                                                                                                                                                                                                                                                                                                                                                                                                                                                                                                                                                                                                                                                                                                                                                                                                                                    | 2                 |                                                                                                                                                                                                                                                                                                                                                                                                                                                                                                                                                                                                                                                                                                                                                                                                                                                      |                                 |                                   |                                                                  |          |             |          |             |               |                       |                            |                                 |                                   |                                                                  |               |             |                   |                 |   |                      |                                   |                   |        |    |      |   |   |    |         |   |   |    |        |   |   |    |          |   |   |    |           |   |   |    |         |   |   |    |        |   |   |    |        |   |   |    |       |   |   |    |        |   |   |    |       |   |   |    |      |   |   |    |       |   |   |    |        |   |   |    |      |   |   |    |               |   |   |  |
| g.                                                                                                                                                                                                                                                                                                                                                                      | LUO                                                                                                                                                                                                                                                                                                                                                                                                                                                                                                                                                                                                                                                                                                                                                                                                                                                                                                                                       | 1                                                                                                                                                                                                                                                                                                                                                                                                                                                                                                                                                                                                                                                                                                                                                                                                                                                                                                                                                                                                                                                                                                                                                                                                                                                                                                                                                                                                                                                                                                                                                                                                                                                                                                                                                                                                                                                                                                                                                                                                                                                                                                                                                                                                                                                                                                                                                                                                                                                                                                                                                                    | 2                 |                                                                                                                                                                                                                                                                                                                                                                                                                                                                                                                                                                                                                                                                                                                                                                                                                                                      |                                 |                                   |                                                                  |          |             |          |             |               |                       |                            |                                 |                                   |                                                                  |               |             |                   |                 |   |                      |                                   |                   |        |    |      |   |   |    |         |   |   |    |        |   |   |    |          |   |   |    |           |   |   |    |         |   |   |    |        |   |   |    |        |   |   |    |       |   |   |    |        |   |   |    |       |   |   |    |      |   |   |    |       |   |   |    |        |   |   |    |      |   |   |    |               |   |   |  |
| h.                                                                                                                                                                                                                                                                                                                                                                      | MASAI                                                                                                                                                                                                                                                                                                                                                                                                                                                                                                                                                                                                                                                                                                                                                                                                                                                                                                                                     | 1                                                                                                                                                                                                                                                                                                                                                                                                                                                                                                                                                                                                                                                                                                                                                                                                                                                                                                                                                                                                                                                                                                                                                                                                                                                                                                                                                                                                                                                                                                                                                                                                                                                                                                                                                                                                                                                                                                                                                                                                                                                                                                                                                                                                                                                                                                                                                                                                                                                                                                                                                                    | 2                 |                                                                                                                                                                                                                                                                                                                                                                                                                                                                                                                                                                                                                                                                                                                                                                                                                                                      |                                 |                                   |                                                                  |          |             |          |             |               |                       |                            |                                 |                                   |                                                                  |               |             |                   |                 |   |                      |                                   |                   |        |    |      |   |   |    |         |   |   |    |        |   |   |    |          |   |   |    |           |   |   |    |         |   |   |    |        |   |   |    |        |   |   |    |       |   |   |    |        |   |   |    |       |   |   |    |      |   |   |    |       |   |   |    |        |   |   |    |      |   |   |    |               |   |   |  |
| i.                                                                                                                                                                                                                                                                                                                                                                      | MERU                                                                                                                                                                                                                                                                                                                                                                                                                                                                                                                                                                                                                                                                                                                                                                                                                                                                                                                                      | 1                                                                                                                                                                                                                                                                                                                                                                                                                                                                                                                                                                                                                                                                                                                                                                                                                                                                                                                                                                                                                                                                                                                                                                                                                                                                                                                                                                                                                                                                                                                                                                                                                                                                                                                                                                                                                                                                                                                                                                                                                                                                                                                                                                                                                                                                                                                                                                                                                                                                                                                                                                    | 2                 |                                                                                                                                                                                                                                                                                                                                                                                                                                                                                                                                                                                                                                                                                                                                                                                                                                                      |                                 |                                   |                                                                  |          |             |          |             |               |                       |                            |                                 |                                   |                                                                  |               |             |                   |                 |   |                      |                                   |                   |        |    |      |   |   |    |         |   |   |    |        |   |   |    |          |   |   |    |           |   |   |    |         |   |   |    |        |   |   |    |        |   |   |    |       |   |   |    |        |   |   |    |       |   |   |    |      |   |   |    |       |   |   |    |        |   |   |    |      |   |   |    |               |   |   |  |
| j.                                                                                                                                                                                                                                                                                                                                                                      | GIRIAMA                                                                                                                                                                                                                                                                                                                                                                                                                                                                                                                                                                                                                                                                                                                                                                                                                                                                                                                                   | 1                                                                                                                                                                                                                                                                                                                                                                                                                                                                                                                                                                                                                                                                                                                                                                                                                                                                                                                                                                                                                                                                                                                                                                                                                                                                                                                                                                                                                                                                                                                                                                                                                                                                                                                                                                                                                                                                                                                                                                                                                                                                                                                                                                                                                                                                                                                                                                                                                                                                                                                                                                    | 2                 |                                                                                                                                                                                                                                                                                                                                                                                                                                                                                                                                                                                                                                                                                                                                                                                                                                                      |                                 |                                   |                                                                  |          |             |          |             |               |                       |                            |                                 |                                   |                                                                  |               |             |                   |                 |   |                      |                                   |                   |        |    |      |   |   |    |         |   |   |    |        |   |   |    |          |   |   |    |           |   |   |    |         |   |   |    |        |   |   |    |        |   |   |    |       |   |   |    |        |   |   |    |       |   |   |    |      |   |   |    |       |   |   |    |        |   |   |    |      |   |   |    |               |   |   |  |
| k.                                                                                                                                                                                                                                                                                                                                                                      | SOMALI                                                                                                                                                                                                                                                                                                                                                                                                                                                                                                                                                                                                                                                                                                                                                                                                                                                                                                                                    | 1                                                                                                                                                                                                                                                                                                                                                                                                                                                                                                                                                                                                                                                                                                                                                                                                                                                                                                                                                                                                                                                                                                                                                                                                                                                                                                                                                                                                                                                                                                                                                                                                                                                                                                                                                                                                                                                                                                                                                                                                                                                                                                                                                                                                                                                                                                                                                                                                                                                                                                                                                                    | 2                 |                                                                                                                                                                                                                                                                                                                                                                                                                                                                                                                                                                                                                                                                                                                                                                                                                                                      |                                 |                                   |                                                                  |          |             |          |             |               |                       |                            |                                 |                                   |                                                                  |               |             |                   |                 |   |                      |                                   |                   |        |    |      |   |   |    |         |   |   |    |        |   |   |    |          |   |   |    |           |   |   |    |         |   |   |    |        |   |   |    |        |   |   |    |       |   |   |    |        |   |   |    |       |   |   |    |      |   |   |    |       |   |   |    |        |   |   |    |      |   |   |    |               |   |   |  |
| l.                                                                                                                                                                                                                                                                                                                                                                      | KIBORANA                                                                                                                                                                                                                                                                                                                                                                                                                                                                                                                                                                                                                                                                                                                                                                                                                                                                                                                                  | 1                                                                                                                                                                                                                                                                                                                                                                                                                                                                                                                                                                                                                                                                                                                                                                                                                                                                                                                                                                                                                                                                                                                                                                                                                                                                                                                                                                                                                                                                                                                                                                                                                                                                                                                                                                                                                                                                                                                                                                                                                                                                                                                                                                                                                                                                                                                                                                                                                                                                                                                                                                    | 2                 |                                                                                                                                                                                                                                                                                                                                                                                                                                                                                                                                                                                                                                                                                                                                                                                                                                                      |                                 |                                   |                                                                  |          |             |          |             |               |                       |                            |                                 |                                   |                                                                  |               |             |                   |                 |   |                      |                                   |                   |        |    |      |   |   |    |         |   |   |    |        |   |   |    |          |   |   |    |           |   |   |    |         |   |   |    |        |   |   |    |        |   |   |    |       |   |   |    |        |   |   |    |       |   |   |    |      |   |   |    |       |   |   |    |        |   |   |    |      |   |   |    |               |   |   |  |
| m.                                                                                                                                                                                                                                                                                                                                                                      | KISWAHILI                                                                                                                                                                                                                                                                                                                                                                                                                                                                                                                                                                                                                                                                                                                                                                                                                                                                                                                                 | 1                                                                                                                                                                                                                                                                                                                                                                                                                                                                                                                                                                                                                                                                                                                                                                                                                                                                                                                                                                                                                                                                                                                                                                                                                                                                                                                                                                                                                                                                                                                                                                                                                                                                                                                                                                                                                                                                                                                                                                                                                                                                                                                                                                                                                                                                                                                                                                                                                                                                                                                                                                    | 2                 |                                                                                                                                                                                                                                                                                                                                                                                                                                                                                                                                                                                                                                                                                                                                                                                                                                                      |                                 |                                   |                                                                  |          |             |          |             |               |                       |                            |                                 |                                   |                                                                  |               |             |                   |                 |   |                      |                                   |                   |        |    |      |   |   |    |         |   |   |    |        |   |   |    |          |   |   |    |           |   |   |    |         |   |   |    |        |   |   |    |        |   |   |    |       |   |   |    |        |   |   |    |       |   |   |    |      |   |   |    |       |   |   |    |        |   |   |    |      |   |   |    |               |   |   |  |
| n.                                                                                                                                                                                                                                                                                                                                                                      | ENGLISH                                                                                                                                                                                                                                                                                                                                                                                                                                                                                                                                                                                                                                                                                                                                                                                                                                                                                                                                   | 1                                                                                                                                                                                                                                                                                                                                                                                                                                                                                                                                                                                                                                                                                                                                                                                                                                                                                                                                                                                                                                                                                                                                                                                                                                                                                                                                                                                                                                                                                                                                                                                                                                                                                                                                                                                                                                                                                                                                                                                                                                                                                                                                                                                                                                                                                                                                                                                                                                                                                                                                                                    | 2                 |                                                                                                                                                                                                                                                                                                                                                                                                                                                                                                                                                                                                                                                                                                                                                                                                                                                      |                                 |                                   |                                                                  |          |             |          |             |               |                       |                            |                                 |                                   |                                                                  |               |             |                   |                 |   |                      |                                   |                   |        |    |      |   |   |    |         |   |   |    |        |   |   |    |          |   |   |    |           |   |   |    |         |   |   |    |        |   |   |    |        |   |   |    |       |   |   |    |        |   |   |    |       |   |   |    |      |   |   |    |       |   |   |    |        |   |   |    |      |   |   |    |               |   |   |  |
| o.                                                                                                                                                                                                                                                                                                                                                                      | NUBIAN                                                                                                                                                                                                                                                                                                                                                                                                                                                                                                                                                                                                                                                                                                                                                                                                                                                                                                                                    | 1                                                                                                                                                                                                                                                                                                                                                                                                                                                                                                                                                                                                                                                                                                                                                                                                                                                                                                                                                                                                                                                                                                                                                                                                                                                                                                                                                                                                                                                                                                                                                                                                                                                                                                                                                                                                                                                                                                                                                                                                                                                                                                                                                                                                                                                                                                                                                                                                                                                                                                                                                                    | 2                 |                                                                                                                                                                                                                                                                                                                                                                                                                                                                                                                                                                                                                                                                                                                                                                                                                                                      |                                 |                                   |                                                                  |          |             |          |             |               |                       |                            |                                 |                                   |                                                                  |               |             |                   |                 |   |                      |                                   |                   |        |    |      |   |   |    |         |   |   |    |        |   |   |    |          |   |   |    |           |   |   |    |         |   |   |    |        |   |   |    |        |   |   |    |       |   |   |    |        |   |   |    |       |   |   |    |      |   |   |    |       |   |   |    |        |   |   |    |      |   |   |    |               |   |   |  |
| p.                                                                                                                                                                                                                                                                                                                                                                      | CHONYI                                                                                                                                                                                                                                                                                                                                                                                                                                                                                                                                                                                                                                                                                                                                                                                                                                                                                                                                    | 1                                                                                                                                                                                                                                                                                                                                                                                                                                                                                                                                                                                                                                                                                                                                                                                                                                                                                                                                                                                                                                                                                                                                                                                                                                                                                                                                                                                                                                                                                                                                                                                                                                                                                                                                                                                                                                                                                                                                                                                                                                                                                                                                                                                                                                                                                                                                                                                                                                                                                                                                                                    | 2                 |                                                                                                                                                                                                                                                                                                                                                                                                                                                                                                                                                                                                                                                                                                                                                                                                                                                      |                                 |                                   |                                                                  |          |             |          |             |               |                       |                            |                                 |                                   |                                                                  |               |             |                   |                 |   |                      |                                   |                   |        |    |      |   |   |    |         |   |   |    |        |   |   |    |          |   |   |    |           |   |   |    |         |   |   |    |        |   |   |    |        |   |   |    |       |   |   |    |        |   |   |    |       |   |   |    |      |   |   |    |       |   |   |    |        |   |   |    |      |   |   |    |               |   |   |  |
| q.                                                                                                                                                                                                                                                                                                                                                                      | RABAI                                                                                                                                                                                                                                                                                                                                                                                                                                                                                                                                                                                                                                                                                                                                                                                                                                                                                                                                     | 1                                                                                                                                                                                                                                                                                                                                                                                                                                                                                                                                                                                                                                                                                                                                                                                                                                                                                                                                                                                                                                                                                                                                                                                                                                                                                                                                                                                                                                                                                                                                                                                                                                                                                                                                                                                                                                                                                                                                                                                                                                                                                                                                                                                                                                                                                                                                                                                                                                                                                                                                                                    | 2                 |                                                                                                                                                                                                                                                                                                                                                                                                                                                                                                                                                                                                                                                                                                                                                                                                                                                      |                                 |                                   |                                                                  |          |             |          |             |               |                       |                            |                                 |                                   |                                                                  |               |             |                   |                 |   |                      |                                   |                   |        |    |      |   |   |    |         |   |   |    |        |   |   |    |          |   |   |    |           |   |   |    |         |   |   |    |        |   |   |    |        |   |   |    |       |   |   |    |        |   |   |    |       |   |   |    |      |   |   |    |       |   |   |    |        |   |   |    |      |   |   |    |               |   |   |  |
| r.                                                                                                                                                                                                                                                                                                                                                                      | DURUMA                                                                                                                                                                                                                                                                                                                                                                                                                                                                                                                                                                                                                                                                                                                                                                                                                                                                                                                                    | 1                                                                                                                                                                                                                                                                                                                                                                                                                                                                                                                                                                                                                                                                                                                                                                                                                                                                                                                                                                                                                                                                                                                                                                                                                                                                                                                                                                                                                                                                                                                                                                                                                                                                                                                                                                                                                                                                                                                                                                                                                                                                                                                                                                                                                                                                                                                                                                                                                                                                                                                                                                    | 2                 |                                                                                                                                                                                                                                                                                                                                                                                                                                                                                                                                                                                                                                                                                                                                                                                                                                                      |                                 |                                   |                                                                  |          |             |          |             |               |                       |                            |                                 |                                   |                                                                  |               |             |                   |                 |   |                      |                                   |                   |        |    |      |   |   |    |         |   |   |    |        |   |   |    |          |   |   |    |           |   |   |    |         |   |   |    |        |   |   |    |        |   |   |    |       |   |   |    |        |   |   |    |       |   |   |    |      |   |   |    |       |   |   |    |        |   |   |    |      |   |   |    |               |   |   |  |
| s.                                                                                                                                                                                                                                                                                                                                                                      | KAUMA                                                                                                                                                                                                                                                                                                                                                                                                                                                                                                                                                                                                                                                                                                                                                                                                                                                                                                                                     | 1                                                                                                                                                                                                                                                                                                                                                                                                                                                                                                                                                                                                                                                                                                                                                                                                                                                                                                                                                                                                                                                                                                                                                                                                                                                                                                                                                                                                                                                                                                                                                                                                                                                                                                                                                                                                                                                                                                                                                                                                                                                                                                                                                                                                                                                                                                                                                                                                                                                                                                                                                                    | 2                 |                                                                                                                                                                                                                                                                                                                                                                                                                                                                                                                                                                                                                                                                                                                                                                                                                                                      |                                 |                                   |                                                                  |          |             |          |             |               |                       |                            |                                 |                                   |                                                                  |               |             |                   |                 |   |                      |                                   |                   |        |    |      |   |   |    |         |   |   |    |        |   |   |    |          |   |   |    |           |   |   |    |         |   |   |    |        |   |   |    |        |   |   |    |       |   |   |    |        |   |   |    |       |   |   |    |      |   |   |    |       |   |   |    |        |   |   |    |      |   |   |    |               |   |   |  |
| t.                                                                                                                                                                                                                                                                                                                                                                      | DIGO                                                                                                                                                                                                                                                                                                                                                                                                                                                                                                                                                                                                                                                                                                                                                                                                                                                                                                                                      | 1                                                                                                                                                                                                                                                                                                                                                                                                                                                                                                                                                                                                                                                                                                                                                                                                                                                                                                                                                                                                                                                                                                                                                                                                                                                                                                                                                                                                                                                                                                                                                                                                                                                                                                                                                                                                                                                                                                                                                                                                                                                                                                                                                                                                                                                                                                                                                                                                                                                                                                                                                                    | 2                 |                                                                                                                                                                                                                                                                                                                                                                                                                                                                                                                                                                                                                                                                                                                                                                                                                                                      |                                 |                                   |                                                                  |          |             |          |             |               |                       |                            |                                 |                                   |                                                                  |               |             |                   |                 |   |                      |                                   |                   |        |    |      |   |   |    |         |   |   |    |        |   |   |    |          |   |   |    |           |   |   |    |         |   |   |    |        |   |   |    |        |   |   |    |       |   |   |    |        |   |   |    |       |   |   |    |      |   |   |    |       |   |   |    |        |   |   |    |      |   |   |    |               |   |   |  |
| u.                                                                                                                                                                                                                                                                                                                                                                      | KAMBE                                                                                                                                                                                                                                                                                                                                                                                                                                                                                                                                                                                                                                                                                                                                                                                                                                                                                                                                     | 1                                                                                                                                                                                                                                                                                                                                                                                                                                                                                                                                                                                                                                                                                                                                                                                                                                                                                                                                                                                                                                                                                                                                                                                                                                                                                                                                                                                                                                                                                                                                                                                                                                                                                                                                                                                                                                                                                                                                                                                                                                                                                                                                                                                                                                                                                                                                                                                                                                                                                                                                                                    | 2                 |                                                                                                                                                                                                                                                                                                                                                                                                                                                                                                                                                                                                                                                                                                                                                                                                                                                      |                                 |                                   |                                                                  |          |             |          |             |               |                       |                            |                                 |                                   |                                                                  |               |             |                   |                 |   |                      |                                   |                   |        |    |      |   |   |    |         |   |   |    |        |   |   |    |          |   |   |    |           |   |   |    |         |   |   |    |        |   |   |    |        |   |   |    |       |   |   |    |        |   |   |    |       |   |   |    |      |   |   |    |       |   |   |    |        |   |   |    |      |   |   |    |               |   |   |  |
| v.                                                                                                                                                                                                                                                                                                                                                                      | JIBANA                                                                                                                                                                                                                                                                                                                                                                                                                                                                                                                                                                                                                                                                                                                                                                                                                                                                                                                                    | 1                                                                                                                                                                                                                                                                                                                                                                                                                                                                                                                                                                                                                                                                                                                                                                                                                                                                                                                                                                                                                                                                                                                                                                                                                                                                                                                                                                                                                                                                                                                                                                                                                                                                                                                                                                                                                                                                                                                                                                                                                                                                                                                                                                                                                                                                                                                                                                                                                                                                                                                                                                    | 2                 |                                                                                                                                                                                                                                                                                                                                                                                                                                                                                                                                                                                                                                                                                                                                                                                                                                                      |                                 |                                   |                                                                  |          |             |          |             |               |                       |                            |                                 |                                   |                                                                  |               |             |                   |                 |   |                      |                                   |                   |        |    |      |   |   |    |         |   |   |    |        |   |   |    |          |   |   |    |           |   |   |    |         |   |   |    |        |   |   |    |        |   |   |    |       |   |   |    |        |   |   |    |       |   |   |    |      |   |   |    |       |   |   |    |        |   |   |    |      |   |   |    |               |   |   |  |
| w.                                                                                                                                                                                                                                                                                                                                                                      | RIBE                                                                                                                                                                                                                                                                                                                                                                                                                                                                                                                                                                                                                                                                                                                                                                                                                                                                                                                                      | 1                                                                                                                                                                                                                                                                                                                                                                                                                                                                                                                                                                                                                                                                                                                                                                                                                                                                                                                                                                                                                                                                                                                                                                                                                                                                                                                                                                                                                                                                                                                                                                                                                                                                                                                                                                                                                                                                                                                                                                                                                                                                                                                                                                                                                                                                                                                                                                                                                                                                                                                                                                    | 2                 |                                                                                                                                                                                                                                                                                                                                                                                                                                                                                                                                                                                                                                                                                                                                                                                                                                                      |                                 |                                   |                                                                  |          |             |          |             |               |                       |                            |                                 |                                   |                                                                  |               |             |                   |                 |   |                      |                                   |                   |        |    |      |   |   |    |         |   |   |    |        |   |   |    |          |   |   |    |           |   |   |    |         |   |   |    |        |   |   |    |        |   |   |    |       |   |   |    |        |   |   |    |       |   |   |    |      |   |   |    |       |   |   |    |        |   |   |    |      |   |   |    |               |   |   |  |
| p.                                                                                                                                                                                                                                                                                                                                                                      | OTHER SPECIFY                                                                                                                                                                                                                                                                                                                                                                                                                                                                                                                                                                                                                                                                                                                                                                                                                                                                                                                             | 1                                                                                                                                                                                                                                                                                                                                                                                                                                                                                                                                                                                                                                                                                                                                                                                                                                                                                                                                                                                                                                                                                                                                                                                                                                                                                                                                                                                                                                                                                                                                                                                                                                                                                                                                                                                                                                                                                                                                                                                                                                                                                                                                                                                                                                                                                                                                                                                                                                                                                                                                                                    | 2                 |                                                                                                                                                                                                                                                                                                                                                                                                                                                                                                                                                                                                                                                                                                                                                                                                                                                      |                                 |                                   |                                                                  |          |             |          |             |               |                       |                            |                                 |                                   |                                                                  |               |             |                   |                 |   |                      |                                   |                   |        |    |      |   |   |    |         |   |   |    |        |   |   |    |          |   |   |    |           |   |   |    |         |   |   |    |        |   |   |    |        |   |   |    |       |   |   |    |        |   |   |    |       |   |   |    |      |   |   |    |       |   |   |    |        |   |   |    |      |   |   |    |               |   |   |  |
| 119                                                                                                                                                                                                                                                                                                                                                                     | What is your religion?                                                                                                                                                                                                                                                                                                                                                                                                                                                                                                                                                                                                                                                                                                                                                                                                                                                                                                                    | <table style="width:100%; border: none;"> <tr><td>CATHOLIC</td><td style="text-align: right;">1</td></tr> <tr><td>PROTESTANT</td><td style="text-align: right;">2</td></tr> <tr><td>ISLAM</td><td style="text-align: right;">3</td></tr> <tr><td>TRADITIONAL</td><td style="text-align: right;">4</td></tr> <tr><td>NO RELIGION</td><td style="text-align: right;">5</td></tr> <tr><td>OTHER (SPECIFY _____)</td><td style="text-align: right;">98</td></tr> </table>                                                                                                                                                                                                                                                                                                                                                                                                                                                                                                                                                                                                                                                                                                                                                                                                                                                                                                                                                                                                                                                                                                                                                                                                                                                                                                                                                                                                                                                                                                                                                                                                                                                                                                                                                                                                                                                                                                                                                                                                                                                                                                | CATHOLIC          | 1                                                                                                                                                                                                                                                                                                                                                                                                                                                                                                                                                                                                                                                                                                                                                                                                                                                    | PROTESTANT                      | 2                                 | ISLAM                                                            | 3        | TRADITIONAL | 4        | NO RELIGION | 5             | OTHER (SPECIFY _____) | 98                         | 119                             |                                   |                                                                  |               |             |                   |                 |   |                      |                                   |                   |        |    |      |   |   |    |         |   |   |    |        |   |   |    |          |   |   |    |           |   |   |    |         |   |   |    |        |   |   |    |        |   |   |    |       |   |   |    |        |   |   |    |       |   |   |    |      |   |   |    |       |   |   |    |        |   |   |    |      |   |   |    |               |   |   |  |
| CATHOLIC                                                                                                                                                                                                                                                                                                                                                                | 1                                                                                                                                                                                                                                                                                                                                                                                                                                                                                                                                                                                                                                                                                                                                                                                                                                                                                                                                         |                                                                                                                                                                                                                                                                                                                                                                                                                                                                                                                                                                                                                                                                                                                                                                                                                                                                                                                                                                                                                                                                                                                                                                                                                                                                                                                                                                                                                                                                                                                                                                                                                                                                                                                                                                                                                                                                                                                                                                                                                                                                                                                                                                                                                                                                                                                                                                                                                                                                                                                                                                      |                   |                                                                                                                                                                                                                                                                                                                                                                                                                                                                                                                                                                                                                                                                                                                                                                                                                                                      |                                 |                                   |                                                                  |          |             |          |             |               |                       |                            |                                 |                                   |                                                                  |               |             |                   |                 |   |                      |                                   |                   |        |    |      |   |   |    |         |   |   |    |        |   |   |    |          |   |   |    |           |   |   |    |         |   |   |    |        |   |   |    |        |   |   |    |       |   |   |    |        |   |   |    |       |   |   |    |      |   |   |    |       |   |   |    |        |   |   |    |      |   |   |    |               |   |   |  |
| PROTESTANT                                                                                                                                                                                                                                                                                                                                                              | 2                                                                                                                                                                                                                                                                                                                                                                                                                                                                                                                                                                                                                                                                                                                                                                                                                                                                                                                                         |                                                                                                                                                                                                                                                                                                                                                                                                                                                                                                                                                                                                                                                                                                                                                                                                                                                                                                                                                                                                                                                                                                                                                                                                                                                                                                                                                                                                                                                                                                                                                                                                                                                                                                                                                                                                                                                                                                                                                                                                                                                                                                                                                                                                                                                                                                                                                                                                                                                                                                                                                                      |                   |                                                                                                                                                                                                                                                                                                                                                                                                                                                                                                                                                                                                                                                                                                                                                                                                                                                      |                                 |                                   |                                                                  |          |             |          |             |               |                       |                            |                                 |                                   |                                                                  |               |             |                   |                 |   |                      |                                   |                   |        |    |      |   |   |    |         |   |   |    |        |   |   |    |          |   |   |    |           |   |   |    |         |   |   |    |        |   |   |    |        |   |   |    |       |   |   |    |        |   |   |    |       |   |   |    |      |   |   |    |       |   |   |    |        |   |   |    |      |   |   |    |               |   |   |  |
| ISLAM                                                                                                                                                                                                                                                                                                                                                                   | 3                                                                                                                                                                                                                                                                                                                                                                                                                                                                                                                                                                                                                                                                                                                                                                                                                                                                                                                                         |                                                                                                                                                                                                                                                                                                                                                                                                                                                                                                                                                                                                                                                                                                                                                                                                                                                                                                                                                                                                                                                                                                                                                                                                                                                                                                                                                                                                                                                                                                                                                                                                                                                                                                                                                                                                                                                                                                                                                                                                                                                                                                                                                                                                                                                                                                                                                                                                                                                                                                                                                                      |                   |                                                                                                                                                                                                                                                                                                                                                                                                                                                                                                                                                                                                                                                                                                                                                                                                                                                      |                                 |                                   |                                                                  |          |             |          |             |               |                       |                            |                                 |                                   |                                                                  |               |             |                   |                 |   |                      |                                   |                   |        |    |      |   |   |    |         |   |   |    |        |   |   |    |          |   |   |    |           |   |   |    |         |   |   |    |        |   |   |    |        |   |   |    |       |   |   |    |        |   |   |    |       |   |   |    |      |   |   |    |       |   |   |    |        |   |   |    |      |   |   |    |               |   |   |  |
| TRADITIONAL                                                                                                                                                                                                                                                                                                                                                             | 4                                                                                                                                                                                                                                                                                                                                                                                                                                                                                                                                                                                                                                                                                                                                                                                                                                                                                                                                         |                                                                                                                                                                                                                                                                                                                                                                                                                                                                                                                                                                                                                                                                                                                                                                                                                                                                                                                                                                                                                                                                                                                                                                                                                                                                                                                                                                                                                                                                                                                                                                                                                                                                                                                                                                                                                                                                                                                                                                                                                                                                                                                                                                                                                                                                                                                                                                                                                                                                                                                                                                      |                   |                                                                                                                                                                                                                                                                                                                                                                                                                                                                                                                                                                                                                                                                                                                                                                                                                                                      |                                 |                                   |                                                                  |          |             |          |             |               |                       |                            |                                 |                                   |                                                                  |               |             |                   |                 |   |                      |                                   |                   |        |    |      |   |   |    |         |   |   |    |        |   |   |    |          |   |   |    |           |   |   |    |         |   |   |    |        |   |   |    |        |   |   |    |       |   |   |    |        |   |   |    |       |   |   |    |      |   |   |    |       |   |   |    |        |   |   |    |      |   |   |    |               |   |   |  |
| NO RELIGION                                                                                                                                                                                                                                                                                                                                                             | 5                                                                                                                                                                                                                                                                                                                                                                                                                                                                                                                                                                                                                                                                                                                                                                                                                                                                                                                                         |                                                                                                                                                                                                                                                                                                                                                                                                                                                                                                                                                                                                                                                                                                                                                                                                                                                                                                                                                                                                                                                                                                                                                                                                                                                                                                                                                                                                                                                                                                                                                                                                                                                                                                                                                                                                                                                                                                                                                                                                                                                                                                                                                                                                                                                                                                                                                                                                                                                                                                                                                                      |                   |                                                                                                                                                                                                                                                                                                                                                                                                                                                                                                                                                                                                                                                                                                                                                                                                                                                      |                                 |                                   |                                                                  |          |             |          |             |               |                       |                            |                                 |                                   |                                                                  |               |             |                   |                 |   |                      |                                   |                   |        |    |      |   |   |    |         |   |   |    |        |   |   |    |          |   |   |    |           |   |   |    |         |   |   |    |        |   |   |    |        |   |   |    |       |   |   |    |        |   |   |    |       |   |   |    |      |   |   |    |       |   |   |    |        |   |   |    |      |   |   |    |               |   |   |  |
| OTHER (SPECIFY _____)                                                                                                                                                                                                                                                                                                                                                   | 98                                                                                                                                                                                                                                                                                                                                                                                                                                                                                                                                                                                                                                                                                                                                                                                                                                                                                                                                        |                                                                                                                                                                                                                                                                                                                                                                                                                                                                                                                                                                                                                                                                                                                                                                                                                                                                                                                                                                                                                                                                                                                                                                                                                                                                                                                                                                                                                                                                                                                                                                                                                                                                                                                                                                                                                                                                                                                                                                                                                                                                                                                                                                                                                                                                                                                                                                                                                                                                                                                                                                      |                   |                                                                                                                                                                                                                                                                                                                                                                                                                                                                                                                                                                                                                                                                                                                                                                                                                                                      |                                 |                                   |                                                                  |          |             |          |             |               |                       |                            |                                 |                                   |                                                                  |               |             |                   |                 |   |                      |                                   |                   |        |    |      |   |   |    |         |   |   |    |        |   |   |    |          |   |   |    |           |   |   |    |         |   |   |    |        |   |   |    |        |   |   |    |       |   |   |    |        |   |   |    |       |   |   |    |      |   |   |    |       |   |   |    |        |   |   |    |      |   |   |    |               |   |   |  |
| 120                                                                                                                                                                                                                                                                                                                                                                     | How important is religion to you?                                                                                                                                                                                                                                                                                                                                                                                                                                                                                                                                                                                                                                                                                                                                                                                                                                                                                                         | <p><b>READ OUT OPTIONS</b></p> <table style="width:100%; border: none;"> <tr><td>VERY IMPORTANT</td><td style="text-align: right;">1</td></tr> <tr><td>SOMEWHAT IMPORTANT</td><td style="text-align: right;">2</td></tr> <tr><td>NOT IMPORTANT</td><td style="text-align: right;">3</td></tr> </table>                                                                                                                                                                                                                                                                                                                                                                                                                                                                                                                                                                                                                                                                                                                                                                                                                                                                                                                                                                                                                                                                                                                                                                                                                                                                                                                                                                                                                                                                                                                                                                                                                                                                                                                                                                                                                                                                                                                                                                                                                                                                                                                                                                                                                                                               | VERY IMPORTANT    | 1                                                                                                                                                                                                                                                                                                                                                                                                                                                                                                                                                                                                                                                                                                                                                                                                                                                    | SOMEWHAT IMPORTANT              | 2                                 | NOT IMPORTANT                                                    | 3        | 120         |          |             |               |                       |                            |                                 |                                   |                                                                  |               |             |                   |                 |   |                      |                                   |                   |        |    |      |   |   |    |         |   |   |    |        |   |   |    |          |   |   |    |           |   |   |    |         |   |   |    |        |   |   |    |        |   |   |    |       |   |   |    |        |   |   |    |       |   |   |    |      |   |   |    |       |   |   |    |        |   |   |    |      |   |   |    |               |   |   |  |
| VERY IMPORTANT                                                                                                                                                                                                                                                                                                                                                          | 1                                                                                                                                                                                                                                                                                                                                                                                                                                                                                                                                                                                                                                                                                                                                                                                                                                                                                                                                         |                                                                                                                                                                                                                                                                                                                                                                                                                                                                                                                                                                                                                                                                                                                                                                                                                                                                                                                                                                                                                                                                                                                                                                                                                                                                                                                                                                                                                                                                                                                                                                                                                                                                                                                                                                                                                                                                                                                                                                                                                                                                                                                                                                                                                                                                                                                                                                                                                                                                                                                                                                      |                   |                                                                                                                                                                                                                                                                                                                                                                                                                                                                                                                                                                                                                                                                                                                                                                                                                                                      |                                 |                                   |                                                                  |          |             |          |             |               |                       |                            |                                 |                                   |                                                                  |               |             |                   |                 |   |                      |                                   |                   |        |    |      |   |   |    |         |   |   |    |        |   |   |    |          |   |   |    |           |   |   |    |         |   |   |    |        |   |   |    |        |   |   |    |       |   |   |    |        |   |   |    |       |   |   |    |      |   |   |    |       |   |   |    |        |   |   |    |      |   |   |    |               |   |   |  |
| SOMEWHAT IMPORTANT                                                                                                                                                                                                                                                                                                                                                      | 2                                                                                                                                                                                                                                                                                                                                                                                                                                                                                                                                                                                                                                                                                                                                                                                                                                                                                                                                         |                                                                                                                                                                                                                                                                                                                                                                                                                                                                                                                                                                                                                                                                                                                                                                                                                                                                                                                                                                                                                                                                                                                                                                                                                                                                                                                                                                                                                                                                                                                                                                                                                                                                                                                                                                                                                                                                                                                                                                                                                                                                                                                                                                                                                                                                                                                                                                                                                                                                                                                                                                      |                   |                                                                                                                                                                                                                                                                                                                                                                                                                                                                                                                                                                                                                                                                                                                                                                                                                                                      |                                 |                                   |                                                                  |          |             |          |             |               |                       |                            |                                 |                                   |                                                                  |               |             |                   |                 |   |                      |                                   |                   |        |    |      |   |   |    |         |   |   |    |        |   |   |    |          |   |   |    |           |   |   |    |         |   |   |    |        |   |   |    |        |   |   |    |       |   |   |    |        |   |   |    |       |   |   |    |      |   |   |    |       |   |   |    |        |   |   |    |      |   |   |    |               |   |   |  |
| NOT IMPORTANT                                                                                                                                                                                                                                                                                                                                                           | 3                                                                                                                                                                                                                                                                                                                                                                                                                                                                                                                                                                                                                                                                                                                                                                                                                                                                                                                                         |                                                                                                                                                                                                                                                                                                                                                                                                                                                                                                                                                                                                                                                                                                                                                                                                                                                                                                                                                                                                                                                                                                                                                                                                                                                                                                                                                                                                                                                                                                                                                                                                                                                                                                                                                                                                                                                                                                                                                                                                                                                                                                                                                                                                                                                                                                                                                                                                                                                                                                                                                                      |                   |                                                                                                                                                                                                                                                                                                                                                                                                                                                                                                                                                                                                                                                                                                                                                                                                                                                      |                                 |                                   |                                                                  |          |             |          |             |               |                       |                            |                                 |                                   |                                                                  |               |             |                   |                 |   |                      |                                   |                   |        |    |      |   |   |    |         |   |   |    |        |   |   |    |          |   |   |    |           |   |   |    |         |   |   |    |        |   |   |    |        |   |   |    |       |   |   |    |        |   |   |    |       |   |   |    |      |   |   |    |       |   |   |    |        |   |   |    |      |   |   |    |               |   |   |  |
| 121                                                                                                                                                                                                                                                                                                                                                                     | <p>Now I want to ask you a few questions about the other people who live in your house. For each person that lives with you I will ask about their schooling and employment. Other than you, how many people live in your household?</p> <p><b>EXCLUDING RESPONDENT</b></p>                                                                                                                                                                                                                                                                                                                                                                                                                                                                                                                                                                                                                                                               | <table style="width:100%; border: none;"> <tr> <td>NUMBER OF PEOPLE</td> <td style="text-align: center;"> <input style="width: 50px; height: 20px;" type="text"/> </td> <td></td> </tr> <tr> <td>NONE</td> <td style="text-align: right;">0</td> <td>123</td> </tr> </table>                                                                                                                                                                                                                                                                                                                                                                                                                                                                                                                                                                                                                                                                                                                                                                                                                                                                                                                                                                                                                                                                                                                                                                                                                                                                                                                                                                                                                                                                                                                                                                                                                                                                                                                                                                                                                                                                                                                                                                                                                                                                                                                                                                                                                                                                                         | NUMBER OF PEOPLE  | <input style="width: 50px; height: 20px;" type="text"/>                                                                                                                                                                                                                                                                                                                                                                                                                                                                                                                                                                                                                                                                                                                                                                                              |                                 | NONE                              | 0                                                                | 123      | 121         |          |             |               |                       |                            |                                 |                                   |                                                                  |               |             |                   |                 |   |                      |                                   |                   |        |    |      |   |   |    |         |   |   |    |        |   |   |    |          |   |   |    |           |   |   |    |         |   |   |    |        |   |   |    |        |   |   |    |       |   |   |    |        |   |   |    |       |   |   |    |      |   |   |    |       |   |   |    |        |   |   |    |      |   |   |    |               |   |   |  |
| NUMBER OF PEOPLE                                                                                                                                                                                                                                                                                                                                                        | <input style="width: 50px; height: 20px;" type="text"/>                                                                                                                                                                                                                                                                                                                                                                                                                                                                                                                                                                                                                                                                                                                                                                                                                                                                                   |                                                                                                                                                                                                                                                                                                                                                                                                                                                                                                                                                                                                                                                                                                                                                                                                                                                                                                                                                                                                                                                                                                                                                                                                                                                                                                                                                                                                                                                                                                                                                                                                                                                                                                                                                                                                                                                                                                                                                                                                                                                                                                                                                                                                                                                                                                                                                                                                                                                                                                                                                                      |                   |                                                                                                                                                                                                                                                                                                                                                                                                                                                                                                                                                                                                                                                                                                                                                                                                                                                      |                                 |                                   |                                                                  |          |             |          |             |               |                       |                            |                                 |                                   |                                                                  |               |             |                   |                 |   |                      |                                   |                   |        |    |      |   |   |    |         |   |   |    |        |   |   |    |          |   |   |    |           |   |   |    |         |   |   |    |        |   |   |    |        |   |   |    |       |   |   |    |        |   |   |    |       |   |   |    |      |   |   |    |       |   |   |    |        |   |   |    |      |   |   |    |               |   |   |  |
| NONE                                                                                                                                                                                                                                                                                                                                                                    | 0                                                                                                                                                                                                                                                                                                                                                                                                                                                                                                                                                                                                                                                                                                                                                                                                                                                                                                                                         | 123                                                                                                                                                                                                                                                                                                                                                                                                                                                                                                                                                                                                                                                                                                                                                                                                                                                                                                                                                                                                                                                                                                                                                                                                                                                                                                                                                                                                                                                                                                                                                                                                                                                                                                                                                                                                                                                                                                                                                                                                                                                                                                                                                                                                                                                                                                                                                                                                                                                                                                                                                                  |                   |                                                                                                                                                                                                                                                                                                                                                                                                                                                                                                                                                                                                                                                                                                                                                                                                                                                      |                                 |                                   |                                                                  |          |             |          |             |               |                       |                            |                                 |                                   |                                                                  |               |             |                   |                 |   |                      |                                   |                   |        |    |      |   |   |    |         |   |   |    |        |   |   |    |          |   |   |    |           |   |   |    |         |   |   |    |        |   |   |    |        |   |   |    |       |   |   |    |        |   |   |    |       |   |   |    |      |   |   |    |       |   |   |    |        |   |   |    |      |   |   |    |               |   |   |  |
| <p><b>START BY ASKING WHO THEY LIVE WITH, CONTINUE TO PROBE ABOUT OTHERS WHO LIVE IN THE HOUSEHOLD UNTIL ALL WHO LIVE WITH THE RESPONDENT HAVE BEEN IDENTIFIED. HOUSEHOLD MEMBER IS DEFINED AS SOMEONE WHO REPORTS TO THE SAME HOUSEHOLD HEAD AND EATS FROM THE SAME POT. ASK SCHOOL/WORK QUESTIONS – 122e &amp; 122f and 122g– ONLY OF PERSONS AGE 5 AND ABOVE</b></p> |                                                                                                                                                                                                                                                                                                                                                                                                                                                                                                                                                                                                                                                                                                                                                                                                                                                                                                                                           |                                                                                                                                                                                                                                                                                                                                                                                                                                                                                                                                                                                                                                                                                                                                                                                                                                                                                                                                                                                                                                                                                                                                                                                                                                                                                                                                                                                                                                                                                                                                                                                                                                                                                                                                                                                                                                                                                                                                                                                                                                                                                                                                                                                                                                                                                                                                                                                                                                                                                                                                                                      |                   |                                                                                                                                                                                                                                                                                                                                                                                                                                                                                                                                                                                                                                                                                                                                                                                                                                                      |                                 |                                   |                                                                  |          |             |          |             |               |                       |                            |                                 |                                   |                                                                  |               |             |                   |                 |   |                      |                                   |                   |        |    |      |   |   |    |         |   |   |    |        |   |   |    |          |   |   |    |           |   |   |    |         |   |   |    |        |   |   |    |        |   |   |    |       |   |   |    |        |   |   |    |       |   |   |    |      |   |   |    |       |   |   |    |        |   |   |    |      |   |   |    |               |   |   |  |
| 122                                                                                                                                                                                                                                                                                                                                                                     | <table style="width:100%; border: none;"> <tr> <th style="width:10%;">122a</th> <th style="width:10%;">122b</th> <th style="width:10%;">122c</th> <th style="width:20%;">122d</th> <th style="width:15%;">122e</th> <th style="width:10%;">122f</th> <th style="width:15%;">122g</th> </tr> <tr> <th>Name</th> <th>Age / 8888=DK</th> <th>Sex</th> <th>Relationship to Respondent</th> <th>Highest Level Education Reached</th> <th>Are they in school? [If &lt; age 21]</th> <th>Have they worked for pay in the last month? [If parent/guardian]</th> </tr> <tr> <td></td> <td></td> <td style="text-align: center;"> <b>F M</b><br/>                     1 2                 </td> <td></td> <td></td> <td style="text-align: center;"> <b>YES NO</b><br/>                     1 2                 </td> <td style="text-align: center;"> <b>YES NO DONT KNOW</b><br/>                     1 2 88                 </td> </tr> </table> |                                                                                                                                                                                                                                                                                                                                                                                                                                                                                                                                                                                                                                                                                                                                                                                                                                                                                                                                                                                                                                                                                                                                                                                                                                                                                                                                                                                                                                                                                                                                                                                                                                                                                                                                                                                                                                                                                                                                                                                                                                                                                                                                                                                                                                                                                                                                                                                                                                                                                                                                                                      |                   | 122a                                                                                                                                                                                                                                                                                                                                                                                                                                                                                                                                                                                                                                                                                                                                                                                                                                                 | 122b                            | 122c                              | 122d                                                             | 122e     | 122f        | 122g     | Name        | Age / 8888=DK | Sex                   | Relationship to Respondent | Highest Level Education Reached | Are they in school? [If < age 21] | Have they worked for pay in the last month? [If parent/guardian] |               |             | <b>F M</b><br>1 2 |                 |   | <b>YES NO</b><br>1 2 | <b>YES NO DONT KNOW</b><br>1 2 88 | 122               |        |    |      |   |   |    |         |   |   |    |        |   |   |    |          |   |   |    |           |   |   |    |         |   |   |    |        |   |   |    |        |   |   |    |       |   |   |    |        |   |   |    |       |   |   |    |      |   |   |    |       |   |   |    |        |   |   |    |      |   |   |    |               |   |   |  |
|                                                                                                                                                                                                                                                                                                                                                                         | 122a                                                                                                                                                                                                                                                                                                                                                                                                                                                                                                                                                                                                                                                                                                                                                                                                                                                                                                                                      | 122b                                                                                                                                                                                                                                                                                                                                                                                                                                                                                                                                                                                                                                                                                                                                                                                                                                                                                                                                                                                                                                                                                                                                                                                                                                                                                                                                                                                                                                                                                                                                                                                                                                                                                                                                                                                                                                                                                                                                                                                                                                                                                                                                                                                                                                                                                                                                                                                                                                                                                                                                                                 | 122c              | 122d                                                                                                                                                                                                                                                                                                                                                                                                                                                                                                                                                                                                                                                                                                                                                                                                                                                 | 122e                            | 122f                              | 122g                                                             |          |             |          |             |               |                       |                            |                                 |                                   |                                                                  |               |             |                   |                 |   |                      |                                   |                   |        |    |      |   |   |    |         |   |   |    |        |   |   |    |          |   |   |    |           |   |   |    |         |   |   |    |        |   |   |    |        |   |   |    |       |   |   |    |        |   |   |    |       |   |   |    |      |   |   |    |       |   |   |    |        |   |   |    |      |   |   |    |               |   |   |  |
|                                                                                                                                                                                                                                                                                                                                                                         | Name                                                                                                                                                                                                                                                                                                                                                                                                                                                                                                                                                                                                                                                                                                                                                                                                                                                                                                                                      | Age / 8888=DK                                                                                                                                                                                                                                                                                                                                                                                                                                                                                                                                                                                                                                                                                                                                                                                                                                                                                                                                                                                                                                                                                                                                                                                                                                                                                                                                                                                                                                                                                                                                                                                                                                                                                                                                                                                                                                                                                                                                                                                                                                                                                                                                                                                                                                                                                                                                                                                                                                                                                                                                                        | Sex               | Relationship to Respondent                                                                                                                                                                                                                                                                                                                                                                                                                                                                                                                                                                                                                                                                                                                                                                                                                           | Highest Level Education Reached | Are they in school? [If < age 21] | Have they worked for pay in the last month? [If parent/guardian] |          |             |          |             |               |                       |                            |                                 |                                   |                                                                  |               |             |                   |                 |   |                      |                                   |                   |        |    |      |   |   |    |         |   |   |    |        |   |   |    |          |   |   |    |           |   |   |    |         |   |   |    |        |   |   |    |        |   |   |    |       |   |   |    |        |   |   |    |       |   |   |    |      |   |   |    |       |   |   |    |        |   |   |    |      |   |   |    |               |   |   |  |
|                                                                                                                                                                                                                                                                                                                                                                         |                                                                                                                                                                                                                                                                                                                                                                                                                                                                                                                                                                                                                                                                                                                                                                                                                                                                                                                                           |                                                                                                                                                                                                                                                                                                                                                                                                                                                                                                                                                                                                                                                                                                                                                                                                                                                                                                                                                                                                                                                                                                                                                                                                                                                                                                                                                                                                                                                                                                                                                                                                                                                                                                                                                                                                                                                                                                                                                                                                                                                                                                                                                                                                                                                                                                                                                                                                                                                                                                                                                                      | <b>F M</b><br>1 2 |                                                                                                                                                                                                                                                                                                                                                                                                                                                                                                                                                                                                                                                                                                                                                                                                                                                      |                                 | <b>YES NO</b><br>1 2              | <b>YES NO DONT KNOW</b><br>1 2 88                                |          |             |          |             |               |                       |                            |                                 |                                   |                                                                  |               |             |                   |                 |   |                      |                                   |                   |        |    |      |   |   |    |         |   |   |    |        |   |   |    |          |   |   |    |           |   |   |    |         |   |   |    |        |   |   |    |        |   |   |    |       |   |   |    |        |   |   |    |       |   |   |    |      |   |   |    |       |   |   |    |        |   |   |    |      |   |   |    |               |   |   |  |
|                                                                                                                                                                                                                                                                                                                                                                         |                                                                                                                                                                                                                                                                                                                                                                                                                                                                                                                                                                                                                                                                                                                                                                                                                                                                                                                                           |                                                                                                                                                                                                                                                                                                                                                                                                                                                                                                                                                                                                                                                                                                                                                                                                                                                                                                                                                                                                                                                                                                                                                                                                                                                                                                                                                                                                                                                                                                                                                                                                                                                                                                                                                                                                                                                                                                                                                                                                                                                                                                                                                                                                                                                                                                                                                                                                                                                                                                                                                                      | 1 2               |                                                                                                                                                                                                                                                                                                                                                                                                                                                                                                                                                                                                                                                                                                                                                                                                                                                      |                                 | 1 2                               | 1 2 88                                                           |          |             |          |             |               |                       |                            |                                 |                                   |                                                                  |               |             |                   |                 |   |                      |                                   |                   |        |    |      |   |   |    |         |   |   |    |        |   |   |    |          |   |   |    |           |   |   |    |         |   |   |    |        |   |   |    |        |   |   |    |       |   |   |    |        |   |   |    |       |   |   |    |      |   |   |    |       |   |   |    |        |   |   |    |      |   |   |    |               |   |   |  |
|                                                                                                                                                                                                                                                                                                                                                                         |                                                                                                                                                                                                                                                                                                                                                                                                                                                                                                                                                                                                                                                                                                                                                                                                                                                                                                                                           |                                                                                                                                                                                                                                                                                                                                                                                                                                                                                                                                                                                                                                                                                                                                                                                                                                                                                                                                                                                                                                                                                                                                                                                                                                                                                                                                                                                                                                                                                                                                                                                                                                                                                                                                                                                                                                                                                                                                                                                                                                                                                                                                                                                                                                                                                                                                                                                                                                                                                                                                                                      | 1 2               |                                                                                                                                                                                                                                                                                                                                                                                                                                                                                                                                                                                                                                                                                                                                                                                                                                                      |                                 | 1 2                               | 1 2 88                                                           |          |             |          |             |               |                       |                            |                                 |                                   |                                                                  |               |             |                   |                 |   |                      |                                   |                   |        |    |      |   |   |    |         |   |   |    |        |   |   |    |          |   |   |    |           |   |   |    |         |   |   |    |        |   |   |    |        |   |   |    |       |   |   |    |        |   |   |    |       |   |   |    |      |   |   |    |       |   |   |    |        |   |   |    |      |   |   |    |               |   |   |  |
|                                                                                                                                                                                                                                                                                                                                                                         |                                                                                                                                                                                                                                                                                                                                                                                                                                                                                                                                                                                                                                                                                                                                                                                                                                                                                                                                           |                                                                                                                                                                                                                                                                                                                                                                                                                                                                                                                                                                                                                                                                                                                                                                                                                                                                                                                                                                                                                                                                                                                                                                                                                                                                                                                                                                                                                                                                                                                                                                                                                                                                                                                                                                                                                                                                                                                                                                                                                                                                                                                                                                                                                                                                                                                                                                                                                                                                                                                                                                      | 1 2               |                                                                                                                                                                                                                                                                                                                                                                                                                                                                                                                                                                                                                                                                                                                                                                                                                                                      |                                 | 1 2                               | 1 2 88                                                           |          |             |          |             |               |                       |                            |                                 |                                   |                                                                  |               |             |                   |                 |   |                      |                                   |                   |        |    |      |   |   |    |         |   |   |    |        |   |   |    |          |   |   |    |           |   |   |    |         |   |   |    |        |   |   |    |        |   |   |    |       |   |   |    |        |   |   |    |       |   |   |    |      |   |   |    |       |   |   |    |        |   |   |    |      |   |   |    |               |   |   |  |
|                                                                                                                                                                                                                                                                                                                                                                         |                                                                                                                                                                                                                                                                                                                                                                                                                                                                                                                                                                                                                                                                                                                                                                                                                                                                                                                                           |                                                                                                                                                                                                                                                                                                                                                                                                                                                                                                                                                                                                                                                                                                                                                                                                                                                                                                                                                                                                                                                                                                                                                                                                                                                                                                                                                                                                                                                                                                                                                                                                                                                                                                                                                                                                                                                                                                                                                                                                                                                                                                                                                                                                                                                                                                                                                                                                                                                                                                                                                                      | 1 2               |                                                                                                                                                                                                                                                                                                                                                                                                                                                                                                                                                                                                                                                                                                                                                                                                                                                      |                                 | 1 2                               | 1 2 88                                                           |          |             |          |             |               |                       |                            |                                 |                                   |                                                                  |               |             |                   |                 |   |                      |                                   |                   |        |    |      |   |   |    |         |   |   |    |        |   |   |    |          |   |   |    |           |   |   |    |         |   |   |    |        |   |   |    |        |   |   |    |       |   |   |    |        |   |   |    |       |   |   |    |      |   |   |    |       |   |   |    |        |   |   |    |      |   |   |    |               |   |   |  |
|                                                                                                                                                                                                                                                                                                                                                                         |                                                                                                                                                                                                                                                                                                                                                                                                                                                                                                                                                                                                                                                                                                                                                                                                                                                                                                                                           |                                                                                                                                                                                                                                                                                                                                                                                                                                                                                                                                                                                                                                                                                                                                                                                                                                                                                                                                                                                                                                                                                                                                                                                                                                                                                                                                                                                                                                                                                                                                                                                                                                                                                                                                                                                                                                                                                                                                                                                                                                                                                                                                                                                                                                                                                                                                                                                                                                                                                                                                                                      | 1 2               |                                                                                                                                                                                                                                                                                                                                                                                                                                                                                                                                                                                                                                                                                                                                                                                                                                                      |                                 | 1 2                               | 1 2 88                                                           |          |             |          |             |               |                       |                            |                                 |                                   |                                                                  |               |             |                   |                 |   |                      |                                   |                   |        |    |      |   |   |    |         |   |   |    |        |   |   |    |          |   |   |    |           |   |   |    |         |   |   |    |        |   |   |    |        |   |   |    |       |   |   |    |        |   |   |    |       |   |   |    |      |   |   |    |       |   |   |    |        |   |   |    |      |   |   |    |               |   |   |  |
|                                                                                                                                                                                                                                                                                                                                                                         |                                                                                                                                                                                                                                                                                                                                                                                                                                                                                                                                                                                                                                                                                                                                                                                                                                                                                                                                           | 1 2                                                                                                                                                                                                                                                                                                                                                                                                                                                                                                                                                                                                                                                                                                                                                                                                                                                                                                                                                                                                                                                                                                                                                                                                                                                                                                                                                                                                                                                                                                                                                                                                                                                                                                                                                                                                                                                                                                                                                                                                                                                                                                                                                                                                                                                                                                                                                                                                                                                                                                                                                                  |                   |                                                                                                                                                                                                                                                                                                                                                                                                                                                                                                                                                                                                                                                                                                                                                                                                                                                      | 1 2                             | 1 2 88                            |                                                                  |          |             |          |             |               |                       |                            |                                 |                                   |                                                                  |               |             |                   |                 |   |                      |                                   |                   |        |    |      |   |   |    |         |   |   |    |        |   |   |    |          |   |   |    |           |   |   |    |         |   |   |    |        |   |   |    |        |   |   |    |       |   |   |    |        |   |   |    |       |   |   |    |      |   |   |    |       |   |   |    |        |   |   |    |      |   |   |    |               |   |   |  |
|                                                                                                                                                                                                                                                                                                                                                                         |                                                                                                                                                                                                                                                                                                                                                                                                                                                                                                                                                                                                                                                                                                                                                                                                                                                                                                                                           | 1 2                                                                                                                                                                                                                                                                                                                                                                                                                                                                                                                                                                                                                                                                                                                                                                                                                                                                                                                                                                                                                                                                                                                                                                                                                                                                                                                                                                                                                                                                                                                                                                                                                                                                                                                                                                                                                                                                                                                                                                                                                                                                                                                                                                                                                                                                                                                                                                                                                                                                                                                                                                  |                   |                                                                                                                                                                                                                                                                                                                                                                                                                                                                                                                                                                                                                                                                                                                                                                                                                                                      | 1 2                             | 1 2 88                            |                                                                  |          |             |          |             |               |                       |                            |                                 |                                   |                                                                  |               |             |                   |                 |   |                      |                                   |                   |        |    |      |   |   |    |         |   |   |    |        |   |   |    |          |   |   |    |           |   |   |    |         |   |   |    |        |   |   |    |        |   |   |    |       |   |   |    |        |   |   |    |       |   |   |    |      |   |   |    |       |   |   |    |        |   |   |    |      |   |   |    |               |   |   |  |
|                                                                                                                                                                                                                                                                                                                                                                         |                                                                                                                                                                                                                                                                                                                                                                                                                                                                                                                                                                                                                                                                                                                                                                                                                                                                                                                                           | 1 2                                                                                                                                                                                                                                                                                                                                                                                                                                                                                                                                                                                                                                                                                                                                                                                                                                                                                                                                                                                                                                                                                                                                                                                                                                                                                                                                                                                                                                                                                                                                                                                                                                                                                                                                                                                                                                                                                                                                                                                                                                                                                                                                                                                                                                                                                                                                                                                                                                                                                                                                                                  |                   |                                                                                                                                                                                                                                                                                                                                                                                                                                                                                                                                                                                                                                                                                                                                                                                                                                                      | 1 2                             | 1 2 88                            |                                                                  |          |             |          |             |               |                       |                            |                                 |                                   |                                                                  |               |             |                   |                 |   |                      |                                   |                   |        |    |      |   |   |    |         |   |   |    |        |   |   |    |          |   |   |    |           |   |   |    |         |   |   |    |        |   |   |    |        |   |   |    |       |   |   |    |        |   |   |    |       |   |   |    |      |   |   |    |       |   |   |    |        |   |   |    |      |   |   |    |               |   |   |  |
| <p><b>CODES 122e</b></p> <p>1 NO EDUCATION<br/>                 2 NURSERY SCHOOL<br/>                 3 PRIMARY SCHOOL<br/>                 4 SECONDARY SCHOOL<br/>                 5 VOCATIONAL/TECHNICAL TRAINING<br/>                 6 COLLEGE/ UNIVERSITY<br/>                 7 NON-FORMAL SCHOOL<br/>                 88 DONT KNOW</p>                           |                                                                                                                                                                                                                                                                                                                                                                                                                                                                                                                                                                                                                                                                                                                                                                                                                                                                                                                                           |                                                                                                                                                                                                                                                                                                                                                                                                                                                                                                                                                                                                                                                                                                                                                                                                                                                                                                                                                                                                                                                                                                                                                                                                                                                                                                                                                                                                                                                                                                                                                                                                                                                                                                                                                                                                                                                                                                                                                                                                                                                                                                                                                                                                                                                                                                                                                                                                                                                                                                                                                                      |                   | <p><b>CODES 122d:</b></p> <table style="width:100%; border: none;"> <tr> <td>0 Mother</td> <td style="text-align: right;">8 Uncle</td> </tr> <tr> <td>1 Father</td> <td style="text-align: right;">9 Friend</td> </tr> <tr> <td>2 Brother</td> <td style="text-align: right;">10 Boyfriend/Husband</td> </tr> <tr> <td>3 Sister</td> <td style="text-align: right;">11 Own Child</td> </tr> <tr> <td>4 Grandmother</td> <td style="text-align: right;">12 Employer</td> </tr> <tr> <td>5 Grandfather</td> <td style="text-align: right;">13 Guardian</td> </tr> <tr> <td></td> <td style="text-align: right;">14 Niece/nephew</td> </tr> <tr> <td></td> <td style="text-align: right;">15 Other relative</td> </tr> <tr> <td>6 Cousin</td> <td style="text-align: right;">96 Other(SPECIFY)</td> </tr> <tr> <td>7 Aunt</td> <td></td> </tr> </table> |                                 |                                   |                                                                  | 0 Mother | 8 Uncle     | 1 Father | 9 Friend    | 2 Brother     | 10 Boyfriend/Husband  | 3 Sister                   | 11 Own Child                    | 4 Grandmother                     | 12 Employer                                                      | 5 Grandfather | 13 Guardian |                   | 14 Niece/nephew |   | 15 Other relative    | 6 Cousin                          | 96 Other(SPECIFY) | 7 Aunt |    |      |   |   |    |         |   |   |    |        |   |   |    |          |   |   |    |           |   |   |    |         |   |   |    |        |   |   |    |        |   |   |    |       |   |   |    |        |   |   |    |       |   |   |    |      |   |   |    |       |   |   |    |        |   |   |    |      |   |   |    |               |   |   |  |
| 0 Mother                                                                                                                                                                                                                                                                                                                                                                | 8 Uncle                                                                                                                                                                                                                                                                                                                                                                                                                                                                                                                                                                                                                                                                                                                                                                                                                                                                                                                                   |                                                                                                                                                                                                                                                                                                                                                                                                                                                                                                                                                                                                                                                                                                                                                                                                                                                                                                                                                                                                                                                                                                                                                                                                                                                                                                                                                                                                                                                                                                                                                                                                                                                                                                                                                                                                                                                                                                                                                                                                                                                                                                                                                                                                                                                                                                                                                                                                                                                                                                                                                                      |                   |                                                                                                                                                                                                                                                                                                                                                                                                                                                                                                                                                                                                                                                                                                                                                                                                                                                      |                                 |                                   |                                                                  |          |             |          |             |               |                       |                            |                                 |                                   |                                                                  |               |             |                   |                 |   |                      |                                   |                   |        |    |      |   |   |    |         |   |   |    |        |   |   |    |          |   |   |    |           |   |   |    |         |   |   |    |        |   |   |    |        |   |   |    |       |   |   |    |        |   |   |    |       |   |   |    |      |   |   |    |       |   |   |    |        |   |   |    |      |   |   |    |               |   |   |  |
| 1 Father                                                                                                                                                                                                                                                                                                                                                                | 9 Friend                                                                                                                                                                                                                                                                                                                                                                                                                                                                                                                                                                                                                                                                                                                                                                                                                                                                                                                                  |                                                                                                                                                                                                                                                                                                                                                                                                                                                                                                                                                                                                                                                                                                                                                                                                                                                                                                                                                                                                                                                                                                                                                                                                                                                                                                                                                                                                                                                                                                                                                                                                                                                                                                                                                                                                                                                                                                                                                                                                                                                                                                                                                                                                                                                                                                                                                                                                                                                                                                                                                                      |                   |                                                                                                                                                                                                                                                                                                                                                                                                                                                                                                                                                                                                                                                                                                                                                                                                                                                      |                                 |                                   |                                                                  |          |             |          |             |               |                       |                            |                                 |                                   |                                                                  |               |             |                   |                 |   |                      |                                   |                   |        |    |      |   |   |    |         |   |   |    |        |   |   |    |          |   |   |    |           |   |   |    |         |   |   |    |        |   |   |    |        |   |   |    |       |   |   |    |        |   |   |    |       |   |   |    |      |   |   |    |       |   |   |    |        |   |   |    |      |   |   |    |               |   |   |  |
| 2 Brother                                                                                                                                                                                                                                                                                                                                                               | 10 Boyfriend/Husband                                                                                                                                                                                                                                                                                                                                                                                                                                                                                                                                                                                                                                                                                                                                                                                                                                                                                                                      |                                                                                                                                                                                                                                                                                                                                                                                                                                                                                                                                                                                                                                                                                                                                                                                                                                                                                                                                                                                                                                                                                                                                                                                                                                                                                                                                                                                                                                                                                                                                                                                                                                                                                                                                                                                                                                                                                                                                                                                                                                                                                                                                                                                                                                                                                                                                                                                                                                                                                                                                                                      |                   |                                                                                                                                                                                                                                                                                                                                                                                                                                                                                                                                                                                                                                                                                                                                                                                                                                                      |                                 |                                   |                                                                  |          |             |          |             |               |                       |                            |                                 |                                   |                                                                  |               |             |                   |                 |   |                      |                                   |                   |        |    |      |   |   |    |         |   |   |    |        |   |   |    |          |   |   |    |           |   |   |    |         |   |   |    |        |   |   |    |        |   |   |    |       |   |   |    |        |   |   |    |       |   |   |    |      |   |   |    |       |   |   |    |        |   |   |    |      |   |   |    |               |   |   |  |
| 3 Sister                                                                                                                                                                                                                                                                                                                                                                | 11 Own Child                                                                                                                                                                                                                                                                                                                                                                                                                                                                                                                                                                                                                                                                                                                                                                                                                                                                                                                              |                                                                                                                                                                                                                                                                                                                                                                                                                                                                                                                                                                                                                                                                                                                                                                                                                                                                                                                                                                                                                                                                                                                                                                                                                                                                                                                                                                                                                                                                                                                                                                                                                                                                                                                                                                                                                                                                                                                                                                                                                                                                                                                                                                                                                                                                                                                                                                                                                                                                                                                                                                      |                   |                                                                                                                                                                                                                                                                                                                                                                                                                                                                                                                                                                                                                                                                                                                                                                                                                                                      |                                 |                                   |                                                                  |          |             |          |             |               |                       |                            |                                 |                                   |                                                                  |               |             |                   |                 |   |                      |                                   |                   |        |    |      |   |   |    |         |   |   |    |        |   |   |    |          |   |   |    |           |   |   |    |         |   |   |    |        |   |   |    |        |   |   |    |       |   |   |    |        |   |   |    |       |   |   |    |      |   |   |    |       |   |   |    |        |   |   |    |      |   |   |    |               |   |   |  |
| 4 Grandmother                                                                                                                                                                                                                                                                                                                                                           | 12 Employer                                                                                                                                                                                                                                                                                                                                                                                                                                                                                                                                                                                                                                                                                                                                                                                                                                                                                                                               |                                                                                                                                                                                                                                                                                                                                                                                                                                                                                                                                                                                                                                                                                                                                                                                                                                                                                                                                                                                                                                                                                                                                                                                                                                                                                                                                                                                                                                                                                                                                                                                                                                                                                                                                                                                                                                                                                                                                                                                                                                                                                                                                                                                                                                                                                                                                                                                                                                                                                                                                                                      |                   |                                                                                                                                                                                                                                                                                                                                                                                                                                                                                                                                                                                                                                                                                                                                                                                                                                                      |                                 |                                   |                                                                  |          |             |          |             |               |                       |                            |                                 |                                   |                                                                  |               |             |                   |                 |   |                      |                                   |                   |        |    |      |   |   |    |         |   |   |    |        |   |   |    |          |   |   |    |           |   |   |    |         |   |   |    |        |   |   |    |        |   |   |    |       |   |   |    |        |   |   |    |       |   |   |    |      |   |   |    |       |   |   |    |        |   |   |    |      |   |   |    |               |   |   |  |
| 5 Grandfather                                                                                                                                                                                                                                                                                                                                                           | 13 Guardian                                                                                                                                                                                                                                                                                                                                                                                                                                                                                                                                                                                                                                                                                                                                                                                                                                                                                                                               |                                                                                                                                                                                                                                                                                                                                                                                                                                                                                                                                                                                                                                                                                                                                                                                                                                                                                                                                                                                                                                                                                                                                                                                                                                                                                                                                                                                                                                                                                                                                                                                                                                                                                                                                                                                                                                                                                                                                                                                                                                                                                                                                                                                                                                                                                                                                                                                                                                                                                                                                                                      |                   |                                                                                                                                                                                                                                                                                                                                                                                                                                                                                                                                                                                                                                                                                                                                                                                                                                                      |                                 |                                   |                                                                  |          |             |          |             |               |                       |                            |                                 |                                   |                                                                  |               |             |                   |                 |   |                      |                                   |                   |        |    |      |   |   |    |         |   |   |    |        |   |   |    |          |   |   |    |           |   |   |    |         |   |   |    |        |   |   |    |        |   |   |    |       |   |   |    |        |   |   |    |       |   |   |    |      |   |   |    |       |   |   |    |        |   |   |    |      |   |   |    |               |   |   |  |
|                                                                                                                                                                                                                                                                                                                                                                         | 14 Niece/nephew                                                                                                                                                                                                                                                                                                                                                                                                                                                                                                                                                                                                                                                                                                                                                                                                                                                                                                                           |                                                                                                                                                                                                                                                                                                                                                                                                                                                                                                                                                                                                                                                                                                                                                                                                                                                                                                                                                                                                                                                                                                                                                                                                                                                                                                                                                                                                                                                                                                                                                                                                                                                                                                                                                                                                                                                                                                                                                                                                                                                                                                                                                                                                                                                                                                                                                                                                                                                                                                                                                                      |                   |                                                                                                                                                                                                                                                                                                                                                                                                                                                                                                                                                                                                                                                                                                                                                                                                                                                      |                                 |                                   |                                                                  |          |             |          |             |               |                       |                            |                                 |                                   |                                                                  |               |             |                   |                 |   |                      |                                   |                   |        |    |      |   |   |    |         |   |   |    |        |   |   |    |          |   |   |    |           |   |   |    |         |   |   |    |        |   |   |    |        |   |   |    |       |   |   |    |        |   |   |    |       |   |   |    |      |   |   |    |       |   |   |    |        |   |   |    |      |   |   |    |               |   |   |  |
|                                                                                                                                                                                                                                                                                                                                                                         | 15 Other relative                                                                                                                                                                                                                                                                                                                                                                                                                                                                                                                                                                                                                                                                                                                                                                                                                                                                                                                         |                                                                                                                                                                                                                                                                                                                                                                                                                                                                                                                                                                                                                                                                                                                                                                                                                                                                                                                                                                                                                                                                                                                                                                                                                                                                                                                                                                                                                                                                                                                                                                                                                                                                                                                                                                                                                                                                                                                                                                                                                                                                                                                                                                                                                                                                                                                                                                                                                                                                                                                                                                      |                   |                                                                                                                                                                                                                                                                                                                                                                                                                                                                                                                                                                                                                                                                                                                                                                                                                                                      |                                 |                                   |                                                                  |          |             |          |             |               |                       |                            |                                 |                                   |                                                                  |               |             |                   |                 |   |                      |                                   |                   |        |    |      |   |   |    |         |   |   |    |        |   |   |    |          |   |   |    |           |   |   |    |         |   |   |    |        |   |   |    |        |   |   |    |       |   |   |    |        |   |   |    |       |   |   |    |      |   |   |    |       |   |   |    |        |   |   |    |      |   |   |    |               |   |   |  |
| 6 Cousin                                                                                                                                                                                                                                                                                                                                                                | 96 Other(SPECIFY)                                                                                                                                                                                                                                                                                                                                                                                                                                                                                                                                                                                                                                                                                                                                                                                                                                                                                                                         |                                                                                                                                                                                                                                                                                                                                                                                                                                                                                                                                                                                                                                                                                                                                                                                                                                                                                                                                                                                                                                                                                                                                                                                                                                                                                                                                                                                                                                                                                                                                                                                                                                                                                                                                                                                                                                                                                                                                                                                                                                                                                                                                                                                                                                                                                                                                                                                                                                                                                                                                                                      |                   |                                                                                                                                                                                                                                                                                                                                                                                                                                                                                                                                                                                                                                                                                                                                                                                                                                                      |                                 |                                   |                                                                  |          |             |          |             |               |                       |                            |                                 |                                   |                                                                  |               |             |                   |                 |   |                      |                                   |                   |        |    |      |   |   |    |         |   |   |    |        |   |   |    |          |   |   |    |           |   |   |    |         |   |   |    |        |   |   |    |        |   |   |    |       |   |   |    |        |   |   |    |       |   |   |    |      |   |   |    |       |   |   |    |        |   |   |    |      |   |   |    |               |   |   |  |
| 7 Aunt                                                                                                                                                                                                                                                                                                                                                                  |                                                                                                                                                                                                                                                                                                                                                                                                                                                                                                                                                                                                                                                                                                                                                                                                                                                                                                                                           |                                                                                                                                                                                                                                                                                                                                                                                                                                                                                                                                                                                                                                                                                                                                                                                                                                                                                                                                                                                                                                                                                                                                                                                                                                                                                                                                                                                                                                                                                                                                                                                                                                                                                                                                                                                                                                                                                                                                                                                                                                                                                                                                                                                                                                                                                                                                                                                                                                                                                                                                                                      |                   |                                                                                                                                                                                                                                                                                                                                                                                                                                                                                                                                                                                                                                                                                                                                                                                                                                                      |                                 |                                   |                                                                  |          |             |          |             |               |                       |                            |                                 |                                   |                                                                  |               |             |                   |                 |   |                      |                                   |                   |        |    |      |   |   |    |         |   |   |    |        |   |   |    |          |   |   |    |           |   |   |    |         |   |   |    |        |   |   |    |        |   |   |    |       |   |   |    |        |   |   |    |       |   |   |    |      |   |   |    |       |   |   |    |        |   |   |    |      |   |   |    |               |   |   |  |
| 123                                                                                                                                                                                                                                                                                                                                                                     | What is the main material used for the EXTERIOR WALLS of the house you live in?                                                                                                                                                                                                                                                                                                                                                                                                                                                                                                                                                                                                                                                                                                                                                                                                                                                           | <table style="width:100%; border: none;"> <tr><td>MUD</td><td style="text-align: right;">1</td></tr> <tr><td>CEMENT</td><td style="text-align: right;">2</td></tr> <tr><td>CORRUGATED IRON</td><td style="text-align: right;">3</td></tr> <tr><td>WOOD</td><td style="text-align: right;">4</td></tr> <tr><td>STONES</td><td style="text-align: right;">5</td></tr> <tr><td>BRICKS</td><td style="text-align: right;">6</td></tr> <tr><td>GRASS/MAKUTI</td><td style="text-align: right;">7</td></tr> <tr><td>OTHER(SPECIFY) _____</td><td style="text-align: right;">96</td></tr> </table>                                                                                                                                                                                                                                                                                                                                                                                                                                                                                                                                                                                                                                                                                                                                                                                                                                                                                                                                                                                                                                                                                                                                                                                                                                                                                                                                                                                                                                                                                                                                                                                                                                                                                                                                                                                                                                                                                                                                                                          | MUD               | 1                                                                                                                                                                                                                                                                                                                                                                                                                                                                                                                                                                                                                                                                                                                                                                                                                                                    | CEMENT                          | 2                                 | CORRUGATED IRON                                                  | 3        | WOOD        | 4        | STONES      | 5             | BRICKS                | 6                          | GRASS/MAKUTI                    | 7                                 | OTHER(SPECIFY) _____                                             | 96            | 123         |                   |                 |   |                      |                                   |                   |        |    |      |   |   |    |         |   |   |    |        |   |   |    |          |   |   |    |           |   |   |    |         |   |   |    |        |   |   |    |        |   |   |    |       |   |   |    |        |   |   |    |       |   |   |    |      |   |   |    |       |   |   |    |        |   |   |    |      |   |   |    |               |   |   |  |
| MUD                                                                                                                                                                                                                                                                                                                                                                     | 1                                                                                                                                                                                                                                                                                                                                                                                                                                                                                                                                                                                                                                                                                                                                                                                                                                                                                                                                         |                                                                                                                                                                                                                                                                                                                                                                                                                                                                                                                                                                                                                                                                                                                                                                                                                                                                                                                                                                                                                                                                                                                                                                                                                                                                                                                                                                                                                                                                                                                                                                                                                                                                                                                                                                                                                                                                                                                                                                                                                                                                                                                                                                                                                                                                                                                                                                                                                                                                                                                                                                      |                   |                                                                                                                                                                                                                                                                                                                                                                                                                                                                                                                                                                                                                                                                                                                                                                                                                                                      |                                 |                                   |                                                                  |          |             |          |             |               |                       |                            |                                 |                                   |                                                                  |               |             |                   |                 |   |                      |                                   |                   |        |    |      |   |   |    |         |   |   |    |        |   |   |    |          |   |   |    |           |   |   |    |         |   |   |    |        |   |   |    |        |   |   |    |       |   |   |    |        |   |   |    |       |   |   |    |      |   |   |    |       |   |   |    |        |   |   |    |      |   |   |    |               |   |   |  |
| CEMENT                                                                                                                                                                                                                                                                                                                                                                  | 2                                                                                                                                                                                                                                                                                                                                                                                                                                                                                                                                                                                                                                                                                                                                                                                                                                                                                                                                         |                                                                                                                                                                                                                                                                                                                                                                                                                                                                                                                                                                                                                                                                                                                                                                                                                                                                                                                                                                                                                                                                                                                                                                                                                                                                                                                                                                                                                                                                                                                                                                                                                                                                                                                                                                                                                                                                                                                                                                                                                                                                                                                                                                                                                                                                                                                                                                                                                                                                                                                                                                      |                   |                                                                                                                                                                                                                                                                                                                                                                                                                                                                                                                                                                                                                                                                                                                                                                                                                                                      |                                 |                                   |                                                                  |          |             |          |             |               |                       |                            |                                 |                                   |                                                                  |               |             |                   |                 |   |                      |                                   |                   |        |    |      |   |   |    |         |   |   |    |        |   |   |    |          |   |   |    |           |   |   |    |         |   |   |    |        |   |   |    |        |   |   |    |       |   |   |    |        |   |   |    |       |   |   |    |      |   |   |    |       |   |   |    |        |   |   |    |      |   |   |    |               |   |   |  |
| CORRUGATED IRON                                                                                                                                                                                                                                                                                                                                                         | 3                                                                                                                                                                                                                                                                                                                                                                                                                                                                                                                                                                                                                                                                                                                                                                                                                                                                                                                                         |                                                                                                                                                                                                                                                                                                                                                                                                                                                                                                                                                                                                                                                                                                                                                                                                                                                                                                                                                                                                                                                                                                                                                                                                                                                                                                                                                                                                                                                                                                                                                                                                                                                                                                                                                                                                                                                                                                                                                                                                                                                                                                                                                                                                                                                                                                                                                                                                                                                                                                                                                                      |                   |                                                                                                                                                                                                                                                                                                                                                                                                                                                                                                                                                                                                                                                                                                                                                                                                                                                      |                                 |                                   |                                                                  |          |             |          |             |               |                       |                            |                                 |                                   |                                                                  |               |             |                   |                 |   |                      |                                   |                   |        |    |      |   |   |    |         |   |   |    |        |   |   |    |          |   |   |    |           |   |   |    |         |   |   |    |        |   |   |    |        |   |   |    |       |   |   |    |        |   |   |    |       |   |   |    |      |   |   |    |       |   |   |    |        |   |   |    |      |   |   |    |               |   |   |  |
| WOOD                                                                                                                                                                                                                                                                                                                                                                    | 4                                                                                                                                                                                                                                                                                                                                                                                                                                                                                                                                                                                                                                                                                                                                                                                                                                                                                                                                         |                                                                                                                                                                                                                                                                                                                                                                                                                                                                                                                                                                                                                                                                                                                                                                                                                                                                                                                                                                                                                                                                                                                                                                                                                                                                                                                                                                                                                                                                                                                                                                                                                                                                                                                                                                                                                                                                                                                                                                                                                                                                                                                                                                                                                                                                                                                                                                                                                                                                                                                                                                      |                   |                                                                                                                                                                                                                                                                                                                                                                                                                                                                                                                                                                                                                                                                                                                                                                                                                                                      |                                 |                                   |                                                                  |          |             |          |             |               |                       |                            |                                 |                                   |                                                                  |               |             |                   |                 |   |                      |                                   |                   |        |    |      |   |   |    |         |   |   |    |        |   |   |    |          |   |   |    |           |   |   |    |         |   |   |    |        |   |   |    |        |   |   |    |       |   |   |    |        |   |   |    |       |   |   |    |      |   |   |    |       |   |   |    |        |   |   |    |      |   |   |    |               |   |   |  |
| STONES                                                                                                                                                                                                                                                                                                                                                                  | 5                                                                                                                                                                                                                                                                                                                                                                                                                                                                                                                                                                                                                                                                                                                                                                                                                                                                                                                                         |                                                                                                                                                                                                                                                                                                                                                                                                                                                                                                                                                                                                                                                                                                                                                                                                                                                                                                                                                                                                                                                                                                                                                                                                                                                                                                                                                                                                                                                                                                                                                                                                                                                                                                                                                                                                                                                                                                                                                                                                                                                                                                                                                                                                                                                                                                                                                                                                                                                                                                                                                                      |                   |                                                                                                                                                                                                                                                                                                                                                                                                                                                                                                                                                                                                                                                                                                                                                                                                                                                      |                                 |                                   |                                                                  |          |             |          |             |               |                       |                            |                                 |                                   |                                                                  |               |             |                   |                 |   |                      |                                   |                   |        |    |      |   |   |    |         |   |   |    |        |   |   |    |          |   |   |    |           |   |   |    |         |   |   |    |        |   |   |    |        |   |   |    |       |   |   |    |        |   |   |    |       |   |   |    |      |   |   |    |       |   |   |    |        |   |   |    |      |   |   |    |               |   |   |  |
| BRICKS                                                                                                                                                                                                                                                                                                                                                                  | 6                                                                                                                                                                                                                                                                                                                                                                                                                                                                                                                                                                                                                                                                                                                                                                                                                                                                                                                                         |                                                                                                                                                                                                                                                                                                                                                                                                                                                                                                                                                                                                                                                                                                                                                                                                                                                                                                                                                                                                                                                                                                                                                                                                                                                                                                                                                                                                                                                                                                                                                                                                                                                                                                                                                                                                                                                                                                                                                                                                                                                                                                                                                                                                                                                                                                                                                                                                                                                                                                                                                                      |                   |                                                                                                                                                                                                                                                                                                                                                                                                                                                                                                                                                                                                                                                                                                                                                                                                                                                      |                                 |                                   |                                                                  |          |             |          |             |               |                       |                            |                                 |                                   |                                                                  |               |             |                   |                 |   |                      |                                   |                   |        |    |      |   |   |    |         |   |   |    |        |   |   |    |          |   |   |    |           |   |   |    |         |   |   |    |        |   |   |    |        |   |   |    |       |   |   |    |        |   |   |    |       |   |   |    |      |   |   |    |       |   |   |    |        |   |   |    |      |   |   |    |               |   |   |  |
| GRASS/MAKUTI                                                                                                                                                                                                                                                                                                                                                            | 7                                                                                                                                                                                                                                                                                                                                                                                                                                                                                                                                                                                                                                                                                                                                                                                                                                                                                                                                         |                                                                                                                                                                                                                                                                                                                                                                                                                                                                                                                                                                                                                                                                                                                                                                                                                                                                                                                                                                                                                                                                                                                                                                                                                                                                                                                                                                                                                                                                                                                                                                                                                                                                                                                                                                                                                                                                                                                                                                                                                                                                                                                                                                                                                                                                                                                                                                                                                                                                                                                                                                      |                   |                                                                                                                                                                                                                                                                                                                                                                                                                                                                                                                                                                                                                                                                                                                                                                                                                                                      |                                 |                                   |                                                                  |          |             |          |             |               |                       |                            |                                 |                                   |                                                                  |               |             |                   |                 |   |                      |                                   |                   |        |    |      |   |   |    |         |   |   |    |        |   |   |    |          |   |   |    |           |   |   |    |         |   |   |    |        |   |   |    |        |   |   |    |       |   |   |    |        |   |   |    |       |   |   |    |      |   |   |    |       |   |   |    |        |   |   |    |      |   |   |    |               |   |   |  |
| OTHER(SPECIFY) _____                                                                                                                                                                                                                                                                                                                                                    | 96                                                                                                                                                                                                                                                                                                                                                                                                                                                                                                                                                                                                                                                                                                                                                                                                                                                                                                                                        |                                                                                                                                                                                                                                                                                                                                                                                                                                                                                                                                                                                                                                                                                                                                                                                                                                                                                                                                                                                                                                                                                                                                                                                                                                                                                                                                                                                                                                                                                                                                                                                                                                                                                                                                                                                                                                                                                                                                                                                                                                                                                                                                                                                                                                                                                                                                                                                                                                                                                                                                                                      |                   |                                                                                                                                                                                                                                                                                                                                                                                                                                                                                                                                                                                                                                                                                                                                                                                                                                                      |                                 |                                   |                                                                  |          |             |          |             |               |                       |                            |                                 |                                   |                                                                  |               |             |                   |                 |   |                      |                                   |                   |        |    |      |   |   |    |         |   |   |    |        |   |   |    |          |   |   |    |           |   |   |    |         |   |   |    |        |   |   |    |        |   |   |    |       |   |   |    |        |   |   |    |       |   |   |    |      |   |   |    |       |   |   |    |        |   |   |    |      |   |   |    |               |   |   |  |
| 124                                                                                                                                                                                                                                                                                                                                                                     | What is the main material used for the ROOF of the house you live in?                                                                                                                                                                                                                                                                                                                                                                                                                                                                                                                                                                                                                                                                                                                                                                                                                                                                     | <table style="width:100%; border: none;"> <tr><td>CORRUGATED IRON</td><td style="text-align: right;">1</td></tr> <tr><td>PLASTIC</td><td style="text-align: right;">2</td></tr> </table>                                                                                                                                                                                                                                                                                                                                                                                                                                                                                                                                                                                                                                                                                                                                                                                                                                                                                                                                                                                                                                                                                                                                                                                                                                                                                                                                                                                                                                                                                                                                                                                                                                                                                                                                                                                                                                                                                                                                                                                                                                                                                                                                                                                                                                                                                                                                                                             | CORRUGATED IRON   | 1                                                                                                                                                                                                                                                                                                                                                                                                                                                                                                                                                                                                                                                                                                                                                                                                                                                    | PLASTIC                         | 2                                 | 124                                                              |          |             |          |             |               |                       |                            |                                 |                                   |                                                                  |               |             |                   |                 |   |                      |                                   |                   |        |    |      |   |   |    |         |   |   |    |        |   |   |    |          |   |   |    |           |   |   |    |         |   |   |    |        |   |   |    |        |   |   |    |       |   |   |    |        |   |   |    |       |   |   |    |      |   |   |    |       |   |   |    |        |   |   |    |      |   |   |    |               |   |   |  |
| CORRUGATED IRON                                                                                                                                                                                                                                                                                                                                                         | 1                                                                                                                                                                                                                                                                                                                                                                                                                                                                                                                                                                                                                                                                                                                                                                                                                                                                                                                                         |                                                                                                                                                                                                                                                                                                                                                                                                                                                                                                                                                                                                                                                                                                                                                                                                                                                                                                                                                                                                                                                                                                                                                                                                                                                                                                                                                                                                                                                                                                                                                                                                                                                                                                                                                                                                                                                                                                                                                                                                                                                                                                                                                                                                                                                                                                                                                                                                                                                                                                                                                                      |                   |                                                                                                                                                                                                                                                                                                                                                                                                                                                                                                                                                                                                                                                                                                                                                                                                                                                      |                                 |                                   |                                                                  |          |             |          |             |               |                       |                            |                                 |                                   |                                                                  |               |             |                   |                 |   |                      |                                   |                   |        |    |      |   |   |    |         |   |   |    |        |   |   |    |          |   |   |    |           |   |   |    |         |   |   |    |        |   |   |    |        |   |   |    |       |   |   |    |        |   |   |    |       |   |   |    |      |   |   |    |       |   |   |    |        |   |   |    |      |   |   |    |               |   |   |  |
| PLASTIC                                                                                                                                                                                                                                                                                                                                                                 | 2                                                                                                                                                                                                                                                                                                                                                                                                                                                                                                                                                                                                                                                                                                                                                                                                                                                                                                                                         |                                                                                                                                                                                                                                                                                                                                                                                                                                                                                                                                                                                                                                                                                                                                                                                                                                                                                                                                                                                                                                                                                                                                                                                                                                                                                                                                                                                                                                                                                                                                                                                                                                                                                                                                                                                                                                                                                                                                                                                                                                                                                                                                                                                                                                                                                                                                                                                                                                                                                                                                                                      |                   |                                                                                                                                                                                                                                                                                                                                                                                                                                                                                                                                                                                                                                                                                                                                                                                                                                                      |                                 |                                   |                                                                  |          |             |          |             |               |                       |                            |                                 |                                   |                                                                  |               |             |                   |                 |   |                      |                                   |                   |        |    |      |   |   |    |         |   |   |    |        |   |   |    |          |   |   |    |           |   |   |    |         |   |   |    |        |   |   |    |        |   |   |    |       |   |   |    |        |   |   |    |       |   |   |    |      |   |   |    |       |   |   |    |        |   |   |    |      |   |   |    |               |   |   |  |

|     |                                                                                                                                                                                                                                                                                                                                                                                                                                                                                                                                                      |                                                                                                                                                                                                                                                                                                                      |            |     |
|-----|------------------------------------------------------------------------------------------------------------------------------------------------------------------------------------------------------------------------------------------------------------------------------------------------------------------------------------------------------------------------------------------------------------------------------------------------------------------------------------------------------------------------------------------------------|----------------------------------------------------------------------------------------------------------------------------------------------------------------------------------------------------------------------------------------------------------------------------------------------------------------------|------------|-----|
|     |                                                                                                                                                                                                                                                                                                                                                                                                                                                                                                                                                      | PLYWOOD 3<br>TILES 4<br>MAKUTI/GRASS 5<br>OTHER(SPECIFY) _____ 96                                                                                                                                                                                                                                                    |            |     |
| 125 | What is the main material used for the FLOOR of the house you live in?                                                                                                                                                                                                                                                                                                                                                                                                                                                                               | MUD 1<br>CEMENT 2<br>WOOD/CEMENT WITH ADDITIONAL COVERING 3<br>OTHER(SPECIFY) _____ 96                                                                                                                                                                                                                               |            | 125 |
| 126 | What is the main source of drinking water for members of your household?                                                                                                                                                                                                                                                                                                                                                                                                                                                                             | PIPED WATER PIPED INTO RESIDENCE/COMPOUND/PLOT 1<br>PUBLIC TAP WHERE WATER IS FREE 2<br>PUBLIC TAP WHERE WATER IS BOUGHT 3<br>WELL WATER IS BOUGHT 4<br>WELL ON RESIDENCE/PLOT 5<br>PUBLIC WELL 6<br>SURFACE WATER/RIVER/STREAM/POND/LAKE 7<br>RAINWATER 8<br>WATER VENDOR 130<br>OTHER (SPECIFY) 98                 | 130        | 126 |
| 127 | Where is the water source located?                                                                                                                                                                                                                                                                                                                                                                                                                                                                                                                   | IN OWN DWELLING 1<br>IN OWN YARD/PLOT 2<br>ELSEWHERE 3                                                                                                                                                                                                                                                               | 130<br>130 | 127 |
| 128 | How long does it take to walk there, get water and come back?                                                                                                                                                                                                                                                                                                                                                                                                                                                                                        | a. HOURS [0-8] <input type="text"/><br>b. MINUTES [0-480] <input type="text"/><br>DON'T KNOW 88                                                                                                                                                                                                                      |            | 128 |
| 129 | Who usually goes to this source to fetch water for your household?                                                                                                                                                                                                                                                                                                                                                                                                                                                                                   | SELF 1<br>FEMALE AGE 15 AND ABOVE 2<br>MALE AGE 15 AND ABOVE 3<br>OTHER FEMALE CHILD UNDER 15 YEARS OLD 4<br>MALE CHILD UNDER 15 YEARS OLD 5<br>OTHER _____ 98<br>SPECIFY                                                                                                                                            |            | 129 |
| 130 | What kind of toilet facility do members of your household use?                                                                                                                                                                                                                                                                                                                                                                                                                                                                                       | FLUSH TOILET 1<br>VENTILATED PIT LATRINE 2<br>UNVENTILATED PIT LATRINE 3<br>NO FACILITY/BUSH/FIELD 4<br>POUR FLUSH 5<br>OTHER _____ 98<br>SPECIFY                                                                                                                                                                    | 133        | 130 |
| 131 | Do you share this toilet facility with other households?                                                                                                                                                                                                                                                                                                                                                                                                                                                                                             | YES 1<br>NO 2                                                                                                                                                                                                                                                                                                        | 133        | 131 |
| 132 | How many households use this toilet facility?                                                                                                                                                                                                                                                                                                                                                                                                                                                                                                        | NO. OF HOUSEHOLDS<br>IF LESS THAN 10 <input type="text"/><br>10 OR MORE HOUSEHOLDS 95<br>DON'T KNOW 88                                                                                                                                                                                                               |            | 132 |
| 133 | How many rooms in your household are used for sleeping?                                                                                                                                                                                                                                                                                                                                                                                                                                                                                              | NUMBER OF ROOMS <input type="text"/>                                                                                                                                                                                                                                                                                 |            | 133 |
| 134 | How many people share the same sleeping room with you?                                                                                                                                                                                                                                                                                                                                                                                                                                                                                               | NUMBER OF MALES <input type="text"/><br>NUMBER OF FEMALES <input type="text"/>                                                                                                                                                                                                                                       |            | 134 |
| 135 | In the last one month, was there a day that you went without food because there wasn't enough food in the household?                                                                                                                                                                                                                                                                                                                                                                                                                                 | YES 1<br>NO 2                                                                                                                                                                                                                                                                                                        |            | 135 |
| 136 | <b>READ RESPONSE OPTIONS</b><br>Now I want to ask you about different items that you may or may not have in your household. Does anyone in the household that you live in own or have these items?<br><br>A. ELECTRICITY<br>B. RADIO<br>C. TELEVISION<br>D. TELEPHONE/MOBILE PHONE<br>E. KEROSENE LAMP<br>F. BED<br>G. BICYCLE<br>H. MOTORCYCLE<br>I. CAR<br>J. THE HOUSE YOU LIVE IN<br>K. LAND<br>L. SMALL LIVESTOCK (i.e. Poultry, goats)<br>M. LARGE LIVESTOCK (i.e. cows, pigs)<br>N. REFRIGERATOR<br>O. TOOLS/MACHINE PEOPLE USE TO EARN MONEY | <b>NO</b> <b>YES</b><br>1          2<br>1          2 |            | 136 |

| P. JEWELRY                               |                                                                                                                                                                                 | 1                                                                                                                                                                          | 2                                                                                                                                                                                                |                          |     |
|------------------------------------------|---------------------------------------------------------------------------------------------------------------------------------------------------------------------------------|----------------------------------------------------------------------------------------------------------------------------------------------------------------------------|--------------------------------------------------------------------------------------------------------------------------------------------------------------------------------------------------|--------------------------|-----|
| <b>SECTION 2: USE OF SKILLS</b>          |                                                                                                                                                                                 |                                                                                                                                                                            |                                                                                                                                                                                                  |                          |     |
| 201                                      | In your everyday life, how often do you usually read any written materials such as newspapers, pamphlets, magazines, books, or the Bible/Koran ?<br><br>[READ RESPONSE OPTIONS] | ALMOST EVERY DAY<br>AT LEAST ONCE A WEEK<br>AT LEAST ONCE A MONTH<br>LESS THAN ONCE A MONTH<br>NEVER                                                                       | 1<br>2<br>3<br>4<br>5                                                                                                                                                                            | 201                      |     |
| 202                                      | In your everyday life, how often do you usually write anything ?<br><br>[READ RESPONSE OPTIONS]                                                                                 | ALMOST EVERY DAY<br>AT LEAST ONCE A WEEK<br>AT LEAST ONCE A MONTH<br>LESS THAN ONCE A MONTH<br>NEVER                                                                       | 1<br>2<br>3<br>4<br>5                                                                                                                                                                            | 202                      |     |
| 203                                      | In your everyday life, how often do you usually listen to the radio?<br><br>[READ RESPONSE OPTIONS]                                                                             | ALMOST EVERY DAY<br>AT LEAST ONCE A WEEK<br>AT LEAST ONCE A MONTH<br>LESS THAN ONCE A MONTH<br>NOT AT ALL                                                                  | 1<br>2<br>3<br>4<br>5                                                                                                                                                                            | 203                      |     |
| 204                                      | In your everyday life, how often do you usually watch television?<br><br>[READ RESPONSE OPTIONS]                                                                                | ALMOST EVERY DAY<br>AT LEAST ONCE A WEEK<br>AT LEAST ONCE A MONTH<br>LESS THAN ONCE A MONTH<br>NOT AT ALL                                                                  | 1<br>2<br>3<br>4<br>5                                                                                                                                                                            | 204                      |     |
| <b>SECTION 3: RESPONDENT'S SCHOOLING</b> |                                                                                                                                                                                 |                                                                                                                                                                            |                                                                                                                                                                                                  |                          |     |
| <b>QUESTIONS</b>                         |                                                                                                                                                                                 | <b>RESPONSES</b>                                                                                                                                                           |                                                                                                                                                                                                  |                          |     |
| 301                                      | At what age did you start Standard 1?                                                                                                                                           | AGE<br>[4-14]<br>DON'T KNOW                                                                                                                                                | <input type="text"/> <input type="text"/><br>88                                                                                                                                                  | 301                      |     |
| 302                                      | Have you ever repeated a class in school?                                                                                                                                       | YES<br>NO                                                                                                                                                                  | 1<br>2                                                                                                                                                                                           | 304                      |     |
| 303                                      | Please tell me which class you repeated and how many times?<br><br><b>RECORD ALL MENTIONED.</b>                                                                                 | CLASS 1<br>CLASS 2<br>CLASS 3<br>CLASS 4<br>CLASS 5<br>CLASS 6<br>CLASS 7                                                                                                  | Number of times Repeated<br><br><input type="text"/><br><input type="text"/><br><input type="text"/><br><input type="text"/><br><input type="text"/><br><input type="text"/><br>[1-5]<br>NONE 96 | 303                      |     |
| 304                                      | What is the name of the school you attend?<br><br>Note: Pre-populated list                                                                                                      | <hr/>                                                                                                                                                                      |                                                                                                                                                                                                  |                          | 304 |
| 305                                      | Do you live at home or somewhere else to attend school?                                                                                                                         | LIVE AT HOME<br>LIVE SOMEWHERE ELSE                                                                                                                                        | 1<br>2                                                                                                                                                                                           | 305                      |     |
| 306                                      | How do you usually get to school?                                                                                                                                               | BY FOOT / WALKING<br>OWN BICYCLE/HOUSEHOLD BICYCLE<br>HIRED BICYCLE TAXI/BODA BODA<br>BUS/MATATU/MINIBUS/OTHER PUBLIC TRANSPORT<br>PRIVATE VEHICLE<br>OTHER (SPECIFY_____) | 1<br>2<br>3<br>4<br>5<br>98                                                                                                                                                                      | 308<br>308<br>308<br>308 |     |
| 307                                      | How much fare do you usually pay in total to get to school and back?                                                                                                            | a. PER DAY<br>PER MONTH<br>PER TERM<br><br>b. KENYA SHILLINGS                                                                                                              | 1<br>2<br>3<br><br><input type="text"/> <input type="text"/> <input type="text"/> <input type="text"/> <input type="text"/>                                                                      | 307                      |     |

|               |                                                                                                                                                                                                     |                                                                                                                                                                                                                                                                                                                                                                                                                               |                                                                                                                                                                                                                                                                                                                                                                                                                                                                                                                                                                                                                                                                                |     |               |     |     |  |     |  |  |  |  |  |  |  |  |  |  |  |  |  |  |  |  |  |  |  |  |  |  |  |  |  |  |  |  |  |  |     |     |
|---------------|-----------------------------------------------------------------------------------------------------------------------------------------------------------------------------------------------------|-------------------------------------------------------------------------------------------------------------------------------------------------------------------------------------------------------------------------------------------------------------------------------------------------------------------------------------------------------------------------------------------------------------------------------|--------------------------------------------------------------------------------------------------------------------------------------------------------------------------------------------------------------------------------------------------------------------------------------------------------------------------------------------------------------------------------------------------------------------------------------------------------------------------------------------------------------------------------------------------------------------------------------------------------------------------------------------------------------------------------|-----|---------------|-----|-----|--|-----|--|--|--|--|--|--|--|--|--|--|--|--|--|--|--|--|--|--|--|--|--|--|--|--|--|--|--|--|--|--|-----|-----|
|               |                                                                                                                                                                                                     | DON'T KNOW                                                                                                                                                                                                                                                                                                                                                                                                                    | 88888                                                                                                                                                                                                                                                                                                                                                                                                                                                                                                                                                                                                                                                                          |     |               |     |     |  |     |  |  |  |  |  |  |  |  |  |  |  |  |  |  |  |  |  |  |  |  |  |  |  |  |  |  |  |  |  |  |     |     |
| 308           | How long does it usually take you to get to school?                                                                                                                                                 | a. HOURS<br>[0-5]<br>b. MINUTES<br>[0-300]<br><br>DON'T KNOW                                                                                                                                                                                                                                                                                                                                                                  | <table border="1" style="display: inline-table; vertical-align: middle;"> <tr><td> </td><td> </td></tr> <tr><td> </td><td> </td></tr> </table><br>88                                                                                                                                                                                                                                                                                                                                                                                                                                                                                                                           |     |               |     |     |  | 308 |  |  |  |  |  |  |  |  |  |  |  |  |  |  |  |  |  |  |  |  |  |  |  |  |  |  |  |  |  |  |     |     |
|               |                                                                                                                                                                                                     |                                                                                                                                                                                                                                                                                                                                                                                                                               |                                                                                                                                                                                                                                                                                                                                                                                                                                                                                                                                                                                                                                                                                |     |               |     |     |  |     |  |  |  |  |  |  |  |  |  |  |  |  |  |  |  |  |  |  |  |  |  |  |  |  |  |  |  |  |  |  |     |     |
|               |                                                                                                                                                                                                     |                                                                                                                                                                                                                                                                                                                                                                                                                               |                                                                                                                                                                                                                                                                                                                                                                                                                                                                                                                                                                                                                                                                                |     |               |     |     |  |     |  |  |  |  |  |  |  |  |  |  |  |  |  |  |  |  |  |  |  |  |  |  |  |  |  |  |  |  |  |  |     |     |
| 309           | In the previous school term (between September and October last year), did you miss school even for one day?                                                                                        | YES<br>NO                                                                                                                                                                                                                                                                                                                                                                                                                     | 1<br>2                                                                                                                                                                                                                                                                                                                                                                                                                                                                                                                                                                                                                                                                         | 313 | 309           |     |     |  |     |  |  |  |  |  |  |  |  |  |  |  |  |  |  |  |  |  |  |  |  |  |  |  |  |  |  |  |  |  |  |     |     |
| 310           | What were the reasons you missed school during the previous school term? How many days did you miss school for that reason? Any other reason?<br><br><b>DO NOT READ LIST. RECORD ALL MENTIONED.</b> | SELF SICK/ILL<br>NEEDED TO WATCH BROTHERS/SISTERS<br>HOUSEHOLD MEMBER SICK<br>MARKET DAY<br>NEEDED TO DO CHORES AT HOME<br>NEEDED TO RUN ERRANDS FOR PARENTS<br>UNIFORM DIRTY<br>PROBLEMS WITH/AFRAID OF OTHER STUDENTS<br>PROBLEMS WITH/AFRAID OF TEACHER<br>MENSTRUATION<br>WOULD RATHER DO SOMETHING ELSE<br>WENT TO SEE/WAS WITH BOYFRIEND<br>BEREAVEMENT/FUNERAL<br>SCHOOL FEES NOT PAID<br>OTHER (SPECIFY____)          | Days Missed <table border="1" style="display: inline-table; vertical-align: middle;"> <tr><td> </td><td> </td></tr> </table> [1-80] 0<br>NONE 96 |     |               |     |     |  |     |  |  |  |  |  |  |  |  |  |  |  |  |  |  |  |  |  |  |  |  |  |  |  |  |  |  |  |  |  |  | 313 | 310 |
|               |                                                                                                                                                                                                     |                                                                                                                                                                                                                                                                                                                                                                                                                               |                                                                                                                                                                                                                                                                                                                                                                                                                                                                                                                                                                                                                                                                                |     |               |     |     |  |     |  |  |  |  |  |  |  |  |  |  |  |  |  |  |  |  |  |  |  |  |  |  |  |  |  |  |  |  |  |  |     |     |
|               |                                                                                                                                                                                                     |                                                                                                                                                                                                                                                                                                                                                                                                                               |                                                                                                                                                                                                                                                                                                                                                                                                                                                                                                                                                                                                                                                                                |     |               |     |     |  |     |  |  |  |  |  |  |  |  |  |  |  |  |  |  |  |  |  |  |  |  |  |  |  |  |  |  |  |  |  |  |     |     |
|               |                                                                                                                                                                                                     |                                                                                                                                                                                                                                                                                                                                                                                                                               |                                                                                                                                                                                                                                                                                                                                                                                                                                                                                                                                                                                                                                                                                |     |               |     |     |  |     |  |  |  |  |  |  |  |  |  |  |  |  |  |  |  |  |  |  |  |  |  |  |  |  |  |  |  |  |  |  |     |     |
|               |                                                                                                                                                                                                     |                                                                                                                                                                                                                                                                                                                                                                                                                               |                                                                                                                                                                                                                                                                                                                                                                                                                                                                                                                                                                                                                                                                                |     |               |     |     |  |     |  |  |  |  |  |  |  |  |  |  |  |  |  |  |  |  |  |  |  |  |  |  |  |  |  |  |  |  |  |  |     |     |
|               |                                                                                                                                                                                                     |                                                                                                                                                                                                                                                                                                                                                                                                                               |                                                                                                                                                                                                                                                                                                                                                                                                                                                                                                                                                                                                                                                                                |     |               |     |     |  |     |  |  |  |  |  |  |  |  |  |  |  |  |  |  |  |  |  |  |  |  |  |  |  |  |  |  |  |  |  |  |     |     |
|               |                                                                                                                                                                                                     |                                                                                                                                                                                                                                                                                                                                                                                                                               |                                                                                                                                                                                                                                                                                                                                                                                                                                                                                                                                                                                                                                                                                |     |               |     |     |  |     |  |  |  |  |  |  |  |  |  |  |  |  |  |  |  |  |  |  |  |  |  |  |  |  |  |  |  |  |  |  |     |     |
|               |                                                                                                                                                                                                     |                                                                                                                                                                                                                                                                                                                                                                                                                               |                                                                                                                                                                                                                                                                                                                                                                                                                                                                                                                                                                                                                                                                                |     |               |     |     |  |     |  |  |  |  |  |  |  |  |  |  |  |  |  |  |  |  |  |  |  |  |  |  |  |  |  |  |  |  |  |  |     |     |
|               |                                                                                                                                                                                                     |                                                                                                                                                                                                                                                                                                                                                                                                                               |                                                                                                                                                                                                                                                                                                                                                                                                                                                                                                                                                                                                                                                                                |     |               |     |     |  |     |  |  |  |  |  |  |  |  |  |  |  |  |  |  |  |  |  |  |  |  |  |  |  |  |  |  |  |  |  |  |     |     |
|               |                                                                                                                                                                                                     |                                                                                                                                                                                                                                                                                                                                                                                                                               |                                                                                                                                                                                                                                                                                                                                                                                                                                                                                                                                                                                                                                                                                |     |               |     |     |  |     |  |  |  |  |  |  |  |  |  |  |  |  |  |  |  |  |  |  |  |  |  |  |  |  |  |  |  |  |  |  |     |     |
|               |                                                                                                                                                                                                     |                                                                                                                                                                                                                                                                                                                                                                                                                               |                                                                                                                                                                                                                                                                                                                                                                                                                                                                                                                                                                                                                                                                                |     |               |     |     |  |     |  |  |  |  |  |  |  |  |  |  |  |  |  |  |  |  |  |  |  |  |  |  |  |  |  |  |  |  |  |  |     |     |
|               |                                                                                                                                                                                                     |                                                                                                                                                                                                                                                                                                                                                                                                                               |                                                                                                                                                                                                                                                                                                                                                                                                                                                                                                                                                                                                                                                                                |     |               |     |     |  |     |  |  |  |  |  |  |  |  |  |  |  |  |  |  |  |  |  |  |  |  |  |  |  |  |  |  |  |  |  |  |     |     |
|               |                                                                                                                                                                                                     |                                                                                                                                                                                                                                                                                                                                                                                                                               |                                                                                                                                                                                                                                                                                                                                                                                                                                                                                                                                                                                                                                                                                |     |               |     |     |  |     |  |  |  |  |  |  |  |  |  |  |  |  |  |  |  |  |  |  |  |  |  |  |  |  |  |  |  |  |  |  |     |     |
|               |                                                                                                                                                                                                     |                                                                                                                                                                                                                                                                                                                                                                                                                               |                                                                                                                                                                                                                                                                                                                                                                                                                                                                                                                                                                                                                                                                                |     |               |     |     |  |     |  |  |  |  |  |  |  |  |  |  |  |  |  |  |  |  |  |  |  |  |  |  |  |  |  |  |  |  |  |  |     |     |
|               |                                                                                                                                                                                                     |                                                                                                                                                                                                                                                                                                                                                                                                                               |                                                                                                                                                                                                                                                                                                                                                                                                                                                                                                                                                                                                                                                                                |     |               |     |     |  |     |  |  |  |  |  |  |  |  |  |  |  |  |  |  |  |  |  |  |  |  |  |  |  |  |  |  |  |  |  |  |     |     |
|               |                                                                                                                                                                                                     |                                                                                                                                                                                                                                                                                                                                                                                                                               |                                                                                                                                                                                                                                                                                                                                                                                                                                                                                                                                                                                                                                                                                |     |               |     |     |  |     |  |  |  |  |  |  |  |  |  |  |  |  |  |  |  |  |  |  |  |  |  |  |  |  |  |  |  |  |  |  |     |     |
|               |                                                                                                                                                                                                     |                                                                                                                                                                                                                                                                                                                                                                                                                               |                                                                                                                                                                                                                                                                                                                                                                                                                                                                                                                                                                                                                                                                                |     |               |     |     |  |     |  |  |  |  |  |  |  |  |  |  |  |  |  |  |  |  |  |  |  |  |  |  |  |  |  |  |  |  |  |  |     |     |
|               |                                                                                                                                                                                                     |                                                                                                                                                                                                                                                                                                                                                                                                                               |                                                                                                                                                                                                                                                                                                                                                                                                                                                                                                                                                                                                                                                                                |     |               |     |     |  |     |  |  |  |  |  |  |  |  |  |  |  |  |  |  |  |  |  |  |  |  |  |  |  |  |  |  |  |  |  |  |     |     |
|               |                                                                                                                                                                                                     |                                                                                                                                                                                                                                                                                                                                                                                                                               |                                                                                                                                                                                                                                                                                                                                                                                                                                                                                                                                                                                                                                                                                |     |               |     |     |  |     |  |  |  |  |  |  |  |  |  |  |  |  |  |  |  |  |  |  |  |  |  |  |  |  |  |  |  |  |  |  |     |     |
| 311           | What was the <b>MAIN</b> reason you missed school during the previous term?                                                                                                                         | SELF WAS SICK/ILL<br>NEEDED TO WATCH BROTHERS/SISTERS<br>HOUSEHOLD MEMBER SICK<br>MARKET DAY<br>NEEDED TO DO CHORES AT HOME<br>WAS SENT SOMEWHERE BY PARENTS/GUARDIAN<br>UNIFORM DIRTY<br>PROBLEMS WITH/AFRAID OF OTHER STUDENTS<br>PROBLEMS WITH/AFRAID OF TEACHER<br>MENSTRUATION<br>WOULD RATHER DO SOMETHING ELSE<br>WENT TO SEE/WAS WITH BOYFRIEND<br>BEREAVEMENT/FUNERAL<br>SCHOOL FEES NOT PAID<br>OTHER (SPECIFY____) | 1<br>2<br>3<br>4<br>5<br>6<br>7<br>8<br>9<br>10<br>11<br>12<br>13<br>14<br>98                                                                                                                                                                                                                                                                                                                                                                                                                                                                                                                                                                                                  |     | 311           |     |     |  |     |  |  |  |  |  |  |  |  |  |  |  |  |  |  |  |  |  |  |  |  |  |  |  |  |  |  |  |  |  |  |     |     |
| <b>FILTER</b> | <b>IF MISSED DUE TO MENSTRUATION IN 310 OR 311, ASK 312. OTHERS SKIP TO 313.</b>                                                                                                                    |                                                                                                                                                                                                                                                                                                                                                                                                                               |                                                                                                                                                                                                                                                                                                                                                                                                                                                                                                                                                                                                                                                                                |     | <b>FILTER</b> |     |     |  |     |  |  |  |  |  |  |  |  |  |  |  |  |  |  |  |  |  |  |  |  |  |  |  |  |  |  |  |  |  |  |     |     |
| 312           | When you missed class due to menstruation, what was/were the reason(s) you missed class?<br><br><b>[CHECK ALL THAT APPLY]</b>                                                                       | a. You had nothing (e.g.sanitary pads or cloth) to manage period<br>b. You were scared to have accident at school<br>c. You had pain/cramps/headache<br>d. You were embarrassed<br>e. You were scared to be teased at school<br>f. There is no private place to manage period at school<br>g. Lack of water/place to clean<br>h. Diarrhea<br>i. Other (SPECIFY____)                                                           | YES NO<br>1 2<br>1 2<br>1 2<br>1 2<br>1 2<br>1 2<br>1 2<br>1 2<br>98                                                                                                                                                                                                                                                                                                                                                                                                                                                                                                                                                                                                           |     | 312           |     |     |  |     |  |  |  |  |  |  |  |  |  |  |  |  |  |  |  |  |  |  |  |  |  |  |  |  |  |  |  |  |  |  |     |     |
|               | If you said other, please specify                                                                                                                                                                   | _____                                                                                                                                                                                                                                                                                                                                                                                                                         |                                                                                                                                                                                                                                                                                                                                                                                                                                                                                                                                                                                                                                                                                |     |               |     |     |  |     |  |  |  |  |  |  |  |  |  |  |  |  |  |  |  |  |  |  |  |  |  |  |  |  |  |  |  |  |  |  |     |     |
| 313           | In the past school <b>week</b> , how many days was your school in session?                                                                                                                          | DAYS<br>[0-7]                                                                                                                                                                                                                                                                                                                                                                                                                 | <table border="1" style="display: inline-table; vertical-align: middle;"> <tr><td> </td><td> </td></tr> </table><br>IF 0                                                                                                                                                                                                                                                                                                                                                                                                                                                                                                                                                       |     |               | 316 | 313 |  |     |  |  |  |  |  |  |  |  |  |  |  |  |  |  |  |  |  |  |  |  |  |  |  |  |  |  |  |  |  |  |     |     |
|               |                                                                                                                                                                                                     |                                                                                                                                                                                                                                                                                                                                                                                                                               |                                                                                                                                                                                                                                                                                                                                                                                                                                                                                                                                                                                                                                                                                |     |               |     |     |  |     |  |  |  |  |  |  |  |  |  |  |  |  |  |  |  |  |  |  |  |  |  |  |  |  |  |  |  |  |  |  |     |     |
| 314           | In the past school week, how many days did you attend school?                                                                                                                                       | DAYS<br>[0-7]                                                                                                                                                                                                                                                                                                                                                                                                                 | <table border="1" style="display: inline-table; vertical-align: middle;"> <tr><td> </td><td> </td></tr> </table><br>IF 313 = 314]                                                                                                                                                                                                                                                                                                                                                                                                                                                                                                                                              |     |               | 316 | 314 |  |     |  |  |  |  |  |  |  |  |  |  |  |  |  |  |  |  |  |  |  |  |  |  |  |  |  |  |  |  |  |  |     |     |
|               |                                                                                                                                                                                                     |                                                                                                                                                                                                                                                                                                                                                                                                                               |                                                                                                                                                                                                                                                                                                                                                                                                                                                                                                                                                                                                                                                                                |     |               |     |     |  |     |  |  |  |  |  |  |  |  |  |  |  |  |  |  |  |  |  |  |  |  |  |  |  |  |  |  |  |  |  |  |     |     |
| 315           | In the past week, why did you miss school?<br><b>[CHECK ALL THAT APPLY]</b>                                                                                                                         | SELF WAS SICK/ILL<br>NEEDED TO WATCH BROTHERS/SISTERS<br>HOUSEHOLD MEMBER SICK<br>MARKET DAY<br>NEEDED TO DO CHORES AT HOME                                                                                                                                                                                                                                                                                                   | YES NO<br>1 2<br>1 2<br>1 2<br>1 2<br>1 2                                                                                                                                                                                                                                                                                                                                                                                                                                                                                                                                                                                                                                      |     | 315           |     |     |  |     |  |  |  |  |  |  |  |  |  |  |  |  |  |  |  |  |  |  |  |  |  |  |  |  |  |  |  |  |  |  |     |     |

|     |                                                                                                                                                                                                                                                                                                                                                                                                                                                                                                                                                                                                                                                                                                                                                                                                                                                                                                                                                                                                                                                                                                                                                                                                                                                                                                                                                                                                                                                                                                                                                                                                                                                                                                                                                                                                                                                                                                                                                                                                                                                                                                                                 |                                                                                                                                                                                                                                                                                                              |     |     |
|-----|---------------------------------------------------------------------------------------------------------------------------------------------------------------------------------------------------------------------------------------------------------------------------------------------------------------------------------------------------------------------------------------------------------------------------------------------------------------------------------------------------------------------------------------------------------------------------------------------------------------------------------------------------------------------------------------------------------------------------------------------------------------------------------------------------------------------------------------------------------------------------------------------------------------------------------------------------------------------------------------------------------------------------------------------------------------------------------------------------------------------------------------------------------------------------------------------------------------------------------------------------------------------------------------------------------------------------------------------------------------------------------------------------------------------------------------------------------------------------------------------------------------------------------------------------------------------------------------------------------------------------------------------------------------------------------------------------------------------------------------------------------------------------------------------------------------------------------------------------------------------------------------------------------------------------------------------------------------------------------------------------------------------------------------------------------------------------------------------------------------------------------|--------------------------------------------------------------------------------------------------------------------------------------------------------------------------------------------------------------------------------------------------------------------------------------------------------------|-----|-----|
|     |                                                                                                                                                                                                                                                                                                                                                                                                                                                                                                                                                                                                                                                                                                                                                                                                                                                                                                                                                                                                                                                                                                                                                                                                                                                                                                                                                                                                                                                                                                                                                                                                                                                                                                                                                                                                                                                                                                                                                                                                                                                                                                                                 | WAS SENT SOMEWHERE BY PARENTS/GUARDIAN 1 2<br>UNIFORM DIRTY 1 2<br>PROBLEMS WITH/AFRAID OF OTHER STUDENTS 1 2<br>PROBLEMS WITH/AFRAID OF TEACHER 1 2<br>MENSTRUATION 1 2<br>WOULD RATHER DO SOMETHING ELSE 1 2<br>WENT TO SEE/WAS WITH BOYFRIEND 1 2<br>BEREAVEMENT/FUNERAL 1 2<br>OTHER (SPECIFY _____) 1 2 |     |     |
|     | If you said other, please specify                                                                                                                                                                                                                                                                                                                                                                                                                                                                                                                                                                                                                                                                                                                                                                                                                                                                                                                                                                                                                                                                                                                                                                                                                                                                                                                                                                                                                                                                                                                                                                                                                                                                                                                                                                                                                                                                                                                                                                                                                                                                                               | _____                                                                                                                                                                                                                                                                                                        |     |     |
| 316 | <p><b>School Engagement and Participation</b><br/>Now we would like to ask you about your participation and interest in school. For these questions we would like you to tell us if you disagree or agree with the following statements.</p> <p>[Read options 1 and 2 only]</p> <p><b>AGREE</b>                      <b>DISAGREE</b>                      <b>NO OPINION /DON'T KNOW</b></p> <p>a. You do not attend school regularly. Do you... (E-) 1 2 88</p> <p>b. You are attentive in class. Do you... (E+) 1 2 88</p> <p>c. You rarely complete the tasks that are assigned to you in class. Do you... (E-) 1 2 88</p> <p>d. Education is not important to you. Do you... (A-) 1 2 88</p> <p>e. You respect your teachers. Do you... (A+) 1 2 88</p> <p>f. There is no adult at school whom you can talk to if you have a problem. Do you... (A-) 1 2 88</p> <p>g. You study at home even if you do not have an exam. Do you... (E+) 1 2 88</p> <p>h. Your teacher would not notice if you were absent from school. Do you... (A-) 1 2 88</p> <p>i. You often feel that school is boring 1 2 88</p> <p><b>Schooling Competence</b></p> <p>j. You have the talent to learn your lessons well. Do you... (+) 1 2 88</p> <p>k. You often do not understand the lessons in class. Do you... 1 2 88</p> <p>l. It is difficult for you to complete your schoolwork. Do you... (-) 1 2 88</p> <p>m. You feel comfortable participating in class 1 2 88</p> <p><b>n. You do not feel confident answering questions in class</b> 1 2 88</p> <p>o. It is often difficult for you to pay attention in class 1 2 88</p> <p>p. You always complete your school work 1 2 88</p> <p>q. You believe you are capable of doing well in school 1 2 88</p> <p><b>Self Esteem</b></p> <p>r. You are as good or better at doing many things as others of your age. Do you... (-) 1 2 88</p> <p>s. Your opinion is valued in your household. Do you... (+) 1 2 88</p> <p>t. People think that you have a lot of good qualities. Do you... (+) 1 2 88</p> <p>u. You cannot handle or succeed in many things that you do. Do you... (-) 1 2 88</p> |                                                                                                                                                                                                                                                                                                              | 316 |     |
| 317 | What is success in school most determined by? Talent, luck or hard work? (-)                                                                                                                                                                                                                                                                                                                                                                                                                                                                                                                                                                                                                                                                                                                                                                                                                                                                                                                                                                                                                                                                                                                                                                                                                                                                                                                                                                                                                                                                                                                                                                                                                                                                                                                                                                                                                                                                                                                                                                                                                                                    | TALENT 1<br>LUCK 2<br>HARDWORK 3<br>COMBINATION 4<br>NO OPINION/DON'T KNOW 88                                                                                                                                                                                                                                |     | 317 |
|     | <p><b>Education and Schooling Experience</b><br/>I am going to read a series of statements about education and schooling. I want you to tell me if you agree or disagree with the statement.</p>                                                                                                                                                                                                                                                                                                                                                                                                                                                                                                                                                                                                                                                                                                                                                                                                                                                                                                                                                                                                                                                                                                                                                                                                                                                                                                                                                                                                                                                                                                                                                                                                                                                                                                                                                                                                                                                                                                                                |                                                                                                                                                                                                                                                                                                              |     |     |
| 318 | a. It is as important for girls to complete secondary school as it is for boys.                                                                                                                                                                                                                                                                                                                                                                                                                                                                                                                                                                                                                                                                                                                                                                                                                                                                                                                                                                                                                                                                                                                                                                                                                                                                                                                                                                                                                                                                                                                                                                                                                                                                                                                                                                                                                                                                                                                                                                                                                                                 | AGREE 1<br>DISAGREE 2                                                                                                                                                                                                                                                                                        |     | 318 |
|     | b. When a family cannot afford to send all children to school, it is better to send boys than girls.                                                                                                                                                                                                                                                                                                                                                                                                                                                                                                                                                                                                                                                                                                                                                                                                                                                                                                                                                                                                                                                                                                                                                                                                                                                                                                                                                                                                                                                                                                                                                                                                                                                                                                                                                                                                                                                                                                                                                                                                                            | AGREE 1<br>DISAGREE 2                                                                                                                                                                                                                                                                                        |     |     |



|     |                                                                                                                                                                                                                                                                                                                                                                                                                                                                                                         |                                                                                                                                                                                                                                                     |                                                                                                                                            |                     |     |
|-----|---------------------------------------------------------------------------------------------------------------------------------------------------------------------------------------------------------------------------------------------------------------------------------------------------------------------------------------------------------------------------------------------------------------------------------------------------------------------------------------------------------|-----------------------------------------------------------------------------------------------------------------------------------------------------------------------------------------------------------------------------------------------------|--------------------------------------------------------------------------------------------------------------------------------------------|---------------------|-----|
|     | c. A 16-year old girl should get married when she finds an appropriate partner, even if she is still in school.                                                                                                                                                                                                                                                                                                                                                                                         | AGREE<br>DISAGREE                                                                                                                                                                                                                                   | 1<br>2                                                                                                                                     |                     |     |
| 319 | Now I am going to read a series of statements about your current schooling experience. I want you to tell me if the statement applies to you or your experience.<br><br>a. Most of your teachers favor boys in class over girls<br><br>b. There is a female teacher who encourages you to do well in school<br><br>c. Your father approves of you going to school<br><br>d. Your mother approves of you going to school<br><br>e. At times, you have so much work at home, you cannot complete homework | <b>YES</b><br>1<br><br>1<br>1<br>1<br>1<br><br><b>NO</b><br>2<br>2<br>2<br>2<br>2<br><br><b>NA</b><br>8<br>8<br>8<br>8<br>8                                                                                                                         |                                                                                                                                            |                     | 319 |
| 320 | Who receives more positive comments from your class teacher: boys, girls, or do they receive about the same amount?                                                                                                                                                                                                                                                                                                                                                                                     | NO POSITIVE COMMENTS MADE.....<br>BOYS.....<br>GIRLS.....<br>ABOUT THE SAME.....<br>DON'T KNOW.....                                                                                                                                                 | 0<br>1<br>2<br>3<br>88                                                                                                                     |                     | 320 |
| 321 | Who receives more negative comments from your class teacher: boys, girls or do they receive about the same amount?                                                                                                                                                                                                                                                                                                                                                                                      | NO NEGATIVE COMMENTS MADE.....<br>BOYS.....<br>GIRLS.....<br>ABOUT THE SAME.....<br>DON'T KNOW.....                                                                                                                                                 | 0<br>1<br>2<br>3<br>88                                                                                                                     |                     | 321 |
| 322 | Did you ever learn life skills education/family life education in your school?                                                                                                                                                                                                                                                                                                                                                                                                                          |                                                                                                                                                                                                                                                     | Yes<br>No<br>1<br>2                                                                                                                        | 327                 | 322 |
| 323 | In the last year (2016), did any of your teachers cover any of the following topics in class?<br><br>[READ LIST; CHECK ALL THAT APPLY]                                                                                                                                                                                                                                                                                                                                                                  | COMMUNICATION<br>SELF-ESTEEM<br>PREGNANCY<br>PUBERTY/HOW BOYS AND GIRLS MATURE<br>HIV/AIDS<br>MARRIED LIFE/ROLES IN FAMILY<br>MENSTRUATION<br>CONTRACEPTIVES/FAMILY PLANNING<br>ABSTINENCE/AVOIDING SEX<br>HEALTH AND HYGIENE<br>OTHER (SPECIFY___) | <b>YES</b><br>1<br>1<br>1<br>1<br>1<br>1<br>1<br>1<br>1<br>1<br>98<br><br><b>NO</b><br>2<br>2<br>2<br>2<br>2<br>2<br>2<br>2<br>2<br>2<br>2 | If all 'NO':<br>325 | 323 |
| 324 | Who taught those sessions?<br><br>[READ LIST, CHECK ALL THAT APPLY]                                                                                                                                                                                                                                                                                                                                                                                                                                     | Male teacher<br>Female teacher<br>Guidance counselor<br>OTHER (SPECIFY___)                                                                                                                                                                          | 1<br>1<br>1<br>98<br>2<br>2<br>2                                                                                                           |                     | 324 |
| 325 | In the last year (2016), did someone other than your teachers (someone from outside or from an NGO or CBO) teach you any of the following topics in school?<br><br>[READ LIST; CHECK ALL THAT APPLY]                                                                                                                                                                                                                                                                                                    | COMMUNICATION<br>SELF-ESTEEM<br>PREGNANCY<br>PUBERTY/HOW BOYS AND GIRLS MATURE<br>HIV/AIDS<br>MARRIED LIFE/ROLES IN FAMILY<br>MENSTRUATION<br>CONTRACEPTIVES/FAMILY PLANNING<br>ABSTINENCE/AVOIDING SEX<br>HEALTH AND HYGIENE<br>OTHER (SPECIFY___) | <b>YES</b><br>1<br>1<br>1<br>1<br>1<br>1<br>1<br>1<br>1<br>1<br>98<br><br><b>NO</b><br>2<br>2<br>2<br>2<br>2<br>2<br>2<br>2<br>2<br>2<br>2 | If all 'NO':<br>327 | 325 |
| 326 | How often did they teach you these topics?                                                                                                                                                                                                                                                                                                                                                                                                                                                              | EVERY WEEK<br>AT LEAST TWICE PER MONTH<br>ONCE OR TWICE PER TERM<br>LESS OFTEN                                                                                                                                                                      | 1<br>2<br>3<br>4                                                                                                                           |                     | 326 |
| 327 | What is the highest level of school you would like to complete?                                                                                                                                                                                                                                                                                                                                                                                                                                         | DO NOT READ LIST<br>PRIMARY SCHOOL<br>SECONDARY SCHOOL<br>PRE - SECONDARY VOCATIONAL/TECHNICAL TRAINING<br>POST-SECONDARY VOCATIONAL/TECHNICAL TRAINING<br>COLLEGE/UNIVERSITY                                                                       | 1<br>2<br>3<br>4<br>5                                                                                                                      |                     | 327 |
| 328 | Sometimes people are not able to go as far in school as they would like for many reasons. How much school do you actually <u>expect to</u> complete?                                                                                                                                                                                                                                                                                                                                                    | DO NOT READ LIST<br>PRIMARY SCHOOL<br>SECONDARY SCHOOL<br>PRE - SECONDARY VOCATIONAL/TECHNICAL TRAINING<br>POST-SECONDARY VOCATIONAL/TECHNICAL TRAINING<br>COLLEGE/UNIVERSITY                                                                       | 1<br>2<br>3<br>4<br>5<br>401<br>401<br>401                                                                                                 |                     | 328 |
| 329 | What is the main reason why you think you will complete secondary school?                                                                                                                                                                                                                                                                                                                                                                                                                               | DO NOT READ LIST<br>EXPECT TO GET MARRIED<br>CURRENTLY PREGNANT                                                                                                                                                                                     | 1<br>2                                                                                                                                     |                     | 329 |

|                                                         |                                                                                                                                                                                                                                                                                                                                                               | CAN'T PAY SCHOOL FEES 3<br>CAN'T AFFORD UNIFORM 4<br>PARENTS NOT SUPPORTIVE 5<br>DOMESTIC RESPONSIBILITIES 6<br>DON'T EXPECT TO PASS KCPE EXAM 7<br>DON'T EXPECT TO GET A PLACE IN SECONDARY 8<br>OTHER (SPECIFY _____) 98                                                                                                                                                                                                                                                                                                                                                                                                                                                                                                                                                                                                                                                                                                                                                                                                                                                                                                                                                                                                                                                                                                                                                                                                                                                                                                                                                                                                                                                                                                                                                       |                                                                                                                            |                                                                                              |     |                         |     |    |                                |   |   |                   |   |   |                         |   |   |                       |   |   |                         |   |   |                   |   |   |                             |   |   |                   |   |   |                      |   |   |                               |   |   |                                |   |   |                             |   |   |  |  |     |
|---------------------------------------------------------|---------------------------------------------------------------------------------------------------------------------------------------------------------------------------------------------------------------------------------------------------------------------------------------------------------------------------------------------------------------|----------------------------------------------------------------------------------------------------------------------------------------------------------------------------------------------------------------------------------------------------------------------------------------------------------------------------------------------------------------------------------------------------------------------------------------------------------------------------------------------------------------------------------------------------------------------------------------------------------------------------------------------------------------------------------------------------------------------------------------------------------------------------------------------------------------------------------------------------------------------------------------------------------------------------------------------------------------------------------------------------------------------------------------------------------------------------------------------------------------------------------------------------------------------------------------------------------------------------------------------------------------------------------------------------------------------------------------------------------------------------------------------------------------------------------------------------------------------------------------------------------------------------------------------------------------------------------------------------------------------------------------------------------------------------------------------------------------------------------------------------------------------------------|----------------------------------------------------------------------------------------------------------------------------|----------------------------------------------------------------------------------------------|-----|-------------------------|-----|----|--------------------------------|---|---|-------------------|---|---|-------------------------|---|---|-----------------------|---|---|-------------------------|---|---|-------------------|---|---|-----------------------------|---|---|-------------------|---|---|----------------------|---|---|-------------------------------|---|---|--------------------------------|---|---|-----------------------------|---|---|--|--|-----|
| <b>SECTION 4: WORK, SAVINGS, AND FINANCIAL LITERACY</b> |                                                                                                                                                                                                                                                                                                                                                               |                                                                                                                                                                                                                                                                                                                                                                                                                                                                                                                                                                                                                                                                                                                                                                                                                                                                                                                                                                                                                                                                                                                                                                                                                                                                                                                                                                                                                                                                                                                                                                                                                                                                                                                                                                                  |                                                                                                                            |                                                                                              |     |                         |     |    |                                |   |   |                   |   |   |                         |   |   |                       |   |   |                         |   |   |                   |   |   |                             |   |   |                   |   |   |                      |   |   |                               |   |   |                                |   |   |                             |   |   |  |  |     |
|                                                         | <b>QUESTIONS</b>                                                                                                                                                                                                                                                                                                                                              | <b>RESPONSES</b>                                                                                                                                                                                                                                                                                                                                                                                                                                                                                                                                                                                                                                                                                                                                                                                                                                                                                                                                                                                                                                                                                                                                                                                                                                                                                                                                                                                                                                                                                                                                                                                                                                                                                                                                                                 |                                                                                                                            |                                                                                              |     |                         |     |    |                                |   |   |                   |   |   |                         |   |   |                       |   |   |                         |   |   |                   |   |   |                             |   |   |                   |   |   |                      |   |   |                               |   |   |                                |   |   |                             |   |   |  |  |     |
| 401                                                     | Yesterday, how much time did you spend doing household chores, such as cooking, cleaning, laundry, collecting firewood, water?<br><br><b>[IF YESTERDAY WAS FRIDAY, SATURDAY OR SUNDAY, ASK ABOUT THURSDAY]</b>                                                                                                                                                | a. HOURS [0-12]<br>b. MINUTES [0-720]<br><br>DON'T KNOW                                                                                                                                                                                                                                                                                                                                                                                                                                                                                                                                                                                                                                                                                                                                                                                                                                                                                                                                                                                                                                                                                                                                                                                                                                                                                                                                                                                                                                                                                                                                                                                                                                                                                                                          | <table border="1" style="width: 40px; height: 40px;"> <tr><td> </td><td> </td></tr> <tr><td> </td><td> </td></tr> </table> |                                                                                              |     |                         |     | 88 | 401                            |   |   |                   |   |   |                         |   |   |                       |   |   |                         |   |   |                   |   |   |                             |   |   |                   |   |   |                      |   |   |                               |   |   |                                |   |   |                             |   |   |  |  |     |
|                                                         |                                                                                                                                                                                                                                                                                                                                                               |                                                                                                                                                                                                                                                                                                                                                                                                                                                                                                                                                                                                                                                                                                                                                                                                                                                                                                                                                                                                                                                                                                                                                                                                                                                                                                                                                                                                                                                                                                                                                                                                                                                                                                                                                                                  |                                                                                                                            |                                                                                              |     |                         |     |    |                                |   |   |                   |   |   |                         |   |   |                       |   |   |                         |   |   |                   |   |   |                             |   |   |                   |   |   |                      |   |   |                               |   |   |                                |   |   |                             |   |   |  |  |     |
|                                                         |                                                                                                                                                                                                                                                                                                                                                               |                                                                                                                                                                                                                                                                                                                                                                                                                                                                                                                                                                                                                                                                                                                                                                                                                                                                                                                                                                                                                                                                                                                                                                                                                                                                                                                                                                                                                                                                                                                                                                                                                                                                                                                                                                                  |                                                                                                                            |                                                                                              |     |                         |     |    |                                |   |   |                   |   |   |                         |   |   |                       |   |   |                         |   |   |                   |   |   |                             |   |   |                   |   |   |                      |   |   |                               |   |   |                                |   |   |                             |   |   |  |  |     |
| 402                                                     | Aside from your housework, have you done any work for which you were paid in cash or kind (given something in return) in the last                                                                                                                                                                                                                             | YES 1<br>NO 2                                                                                                                                                                                                                                                                                                                                                                                                                                                                                                                                                                                                                                                                                                                                                                                                                                                                                                                                                                                                                                                                                                                                                                                                                                                                                                                                                                                                                                                                                                                                                                                                                                                                                                                                                                    |                                                                                                                            |                                                                                              | 405 |                         |     |    |                                |   |   |                   |   |   |                         |   |   |                       |   |   |                         |   |   |                   |   |   |                             |   |   |                   |   |   |                      |   |   |                               |   |   |                                |   |   |                             |   |   |  |  |     |
| 403                                                     | As you know, some girls take up jobs for which they are paid in cash or kind. Others sell things, have a small business or work on the family farm or in the family business. Just to be sure, in the <u>last month</u> , have you done any chores or activities for which you got paid or were given something in return (for example food, or other goods)? | YES 1<br>NO 2                                                                                                                                                                                                                                                                                                                                                                                                                                                                                                                                                                                                                                                                                                                                                                                                                                                                                                                                                                                                                                                                                                                                                                                                                                                                                                                                                                                                                                                                                                                                                                                                                                                                                                                                                                    |                                                                                                                            |                                                                                              | 405 |                         |     |    |                                |   |   |                   |   |   |                         |   |   |                       |   |   |                         |   |   |                   |   |   |                             |   |   |                   |   |   |                      |   |   |                               |   |   |                                |   |   |                             |   |   |  |  |     |
| 404                                                     | Aside from your housework, have you done any work or chores or activities for which you were paid in cash or kind in the <u>last one year</u> ?                                                                                                                                                                                                               | YES 1<br>NO 2                                                                                                                                                                                                                                                                                                                                                                                                                                                                                                                                                                                                                                                                                                                                                                                                                                                                                                                                                                                                                                                                                                                                                                                                                                                                                                                                                                                                                                                                                                                                                                                                                                                                                                                                                                    |                                                                                                                            |                                                                                              | 407 |                         |     |    |                                |   |   |                   |   |   |                         |   |   |                       |   |   |                         |   |   |                   |   |   |                             |   |   |                   |   |   |                      |   |   |                               |   |   |                                |   |   |                             |   |   |  |  |     |
| 405                                                     | How old were you the very first time you did any work or activity for pay, whether you were paid in cash or kind?                                                                                                                                                                                                                                             | AGE [4-20]<br>DON'T KNOW AGE                                                                                                                                                                                                                                                                                                                                                                                                                                                                                                                                                                                                                                                                                                                                                                                                                                                                                                                                                                                                                                                                                                                                                                                                                                                                                                                                                                                                                                                                                                                                                                                                                                                                                                                                                     | <table border="1" style="width: 40px; height: 20px;"> <tr><td> </td><td> </td></tr> </table>                               |                                                                                              |     | 88                      | 405 |    |                                |   |   |                   |   |   |                         |   |   |                       |   |   |                         |   |   |                   |   |   |                             |   |   |                   |   |   |                      |   |   |                               |   |   |                                |   |   |                             |   |   |  |  |     |
|                                                         |                                                                                                                                                                                                                                                                                                                                                               |                                                                                                                                                                                                                                                                                                                                                                                                                                                                                                                                                                                                                                                                                                                                                                                                                                                                                                                                                                                                                                                                                                                                                                                                                                                                                                                                                                                                                                                                                                                                                                                                                                                                                                                                                                                  |                                                                                                                            |                                                                                              |     |                         |     |    |                                |   |   |                   |   |   |                         |   |   |                       |   |   |                         |   |   |                   |   |   |                             |   |   |                   |   |   |                      |   |   |                               |   |   |                                |   |   |                             |   |   |  |  |     |
| 406                                                     | Which of the following kinds of activities or work did you do for which you were paid in cash or in kind?<br><br><b>[READ ALL OPTIONS]</b>                                                                                                                                                                                                                    | <table style="width: 100%;"> <thead> <tr> <th></th> <th style="text-align: center;">YES</th> <th style="text-align: center;">NO</th> </tr> </thead> <tbody> <tr><td>a. Domestic work (Maid)</td><td style="text-align: center;">1</td><td style="text-align: center;">2</td></tr> <tr><td>b. Wash clothes/utensils/house</td><td style="text-align: center;">1</td><td style="text-align: center;">2</td></tr> <tr><td>c. Fetching water</td><td style="text-align: center;">1</td><td style="text-align: center;">2</td></tr> <tr><td>d. Plaiting hair/beauty</td><td style="text-align: center;">1</td><td style="text-align: center;">2</td></tr> <tr><td>e. Babysit/child care</td><td style="text-align: center;">1</td><td style="text-align: center;">2</td></tr> <tr><td>f. Work in a restaurant</td><td style="text-align: center;">1</td><td style="text-align: center;">2</td></tr> <tr><td>g. Work in a farm</td><td style="text-align: center;">1</td><td style="text-align: center;">2</td></tr> <tr><td>h. Packaging food or drinks</td><td style="text-align: center;">1</td><td style="text-align: center;">2</td></tr> <tr><td>i. Selling things</td><td style="text-align: center;">1</td><td style="text-align: center;">2</td></tr> <tr><td>j. Work in an office</td><td style="text-align: center;">1</td><td style="text-align: center;">2</td></tr> <tr><td>k. Other type of own business</td><td style="text-align: center;">1</td><td style="text-align: center;">2</td></tr> <tr><td>k. Other type of temporary job</td><td style="text-align: center;">1</td><td style="text-align: center;">2</td></tr> <tr><td>l. Other type of employment</td><td style="text-align: center;">1</td><td style="text-align: center;">2</td></tr> </tbody> </table> |                                                                                                                            | YES                                                                                          | NO  | a. Domestic work (Maid) | 1   | 2  | b. Wash clothes/utensils/house | 1 | 2 | c. Fetching water | 1 | 2 | d. Plaiting hair/beauty | 1 | 2 | e. Babysit/child care | 1 | 2 | f. Work in a restaurant | 1 | 2 | g. Work in a farm | 1 | 2 | h. Packaging food or drinks | 1 | 2 | i. Selling things | 1 | 2 | j. Work in an office | 1 | 2 | k. Other type of own business | 1 | 2 | k. Other type of temporary job | 1 | 2 | l. Other type of employment | 1 | 2 |  |  | 406 |
|                                                         | YES                                                                                                                                                                                                                                                                                                                                                           | NO                                                                                                                                                                                                                                                                                                                                                                                                                                                                                                                                                                                                                                                                                                                                                                                                                                                                                                                                                                                                                                                                                                                                                                                                                                                                                                                                                                                                                                                                                                                                                                                                                                                                                                                                                                               |                                                                                                                            |                                                                                              |     |                         |     |    |                                |   |   |                   |   |   |                         |   |   |                       |   |   |                         |   |   |                   |   |   |                             |   |   |                   |   |   |                      |   |   |                               |   |   |                                |   |   |                             |   |   |  |  |     |
| a. Domestic work (Maid)                                 | 1                                                                                                                                                                                                                                                                                                                                                             | 2                                                                                                                                                                                                                                                                                                                                                                                                                                                                                                                                                                                                                                                                                                                                                                                                                                                                                                                                                                                                                                                                                                                                                                                                                                                                                                                                                                                                                                                                                                                                                                                                                                                                                                                                                                                |                                                                                                                            |                                                                                              |     |                         |     |    |                                |   |   |                   |   |   |                         |   |   |                       |   |   |                         |   |   |                   |   |   |                             |   |   |                   |   |   |                      |   |   |                               |   |   |                                |   |   |                             |   |   |  |  |     |
| b. Wash clothes/utensils/house                          | 1                                                                                                                                                                                                                                                                                                                                                             | 2                                                                                                                                                                                                                                                                                                                                                                                                                                                                                                                                                                                                                                                                                                                                                                                                                                                                                                                                                                                                                                                                                                                                                                                                                                                                                                                                                                                                                                                                                                                                                                                                                                                                                                                                                                                |                                                                                                                            |                                                                                              |     |                         |     |    |                                |   |   |                   |   |   |                         |   |   |                       |   |   |                         |   |   |                   |   |   |                             |   |   |                   |   |   |                      |   |   |                               |   |   |                                |   |   |                             |   |   |  |  |     |
| c. Fetching water                                       | 1                                                                                                                                                                                                                                                                                                                                                             | 2                                                                                                                                                                                                                                                                                                                                                                                                                                                                                                                                                                                                                                                                                                                                                                                                                                                                                                                                                                                                                                                                                                                                                                                                                                                                                                                                                                                                                                                                                                                                                                                                                                                                                                                                                                                |                                                                                                                            |                                                                                              |     |                         |     |    |                                |   |   |                   |   |   |                         |   |   |                       |   |   |                         |   |   |                   |   |   |                             |   |   |                   |   |   |                      |   |   |                               |   |   |                                |   |   |                             |   |   |  |  |     |
| d. Plaiting hair/beauty                                 | 1                                                                                                                                                                                                                                                                                                                                                             | 2                                                                                                                                                                                                                                                                                                                                                                                                                                                                                                                                                                                                                                                                                                                                                                                                                                                                                                                                                                                                                                                                                                                                                                                                                                                                                                                                                                                                                                                                                                                                                                                                                                                                                                                                                                                |                                                                                                                            |                                                                                              |     |                         |     |    |                                |   |   |                   |   |   |                         |   |   |                       |   |   |                         |   |   |                   |   |   |                             |   |   |                   |   |   |                      |   |   |                               |   |   |                                |   |   |                             |   |   |  |  |     |
| e. Babysit/child care                                   | 1                                                                                                                                                                                                                                                                                                                                                             | 2                                                                                                                                                                                                                                                                                                                                                                                                                                                                                                                                                                                                                                                                                                                                                                                                                                                                                                                                                                                                                                                                                                                                                                                                                                                                                                                                                                                                                                                                                                                                                                                                                                                                                                                                                                                |                                                                                                                            |                                                                                              |     |                         |     |    |                                |   |   |                   |   |   |                         |   |   |                       |   |   |                         |   |   |                   |   |   |                             |   |   |                   |   |   |                      |   |   |                               |   |   |                                |   |   |                             |   |   |  |  |     |
| f. Work in a restaurant                                 | 1                                                                                                                                                                                                                                                                                                                                                             | 2                                                                                                                                                                                                                                                                                                                                                                                                                                                                                                                                                                                                                                                                                                                                                                                                                                                                                                                                                                                                                                                                                                                                                                                                                                                                                                                                                                                                                                                                                                                                                                                                                                                                                                                                                                                |                                                                                                                            |                                                                                              |     |                         |     |    |                                |   |   |                   |   |   |                         |   |   |                       |   |   |                         |   |   |                   |   |   |                             |   |   |                   |   |   |                      |   |   |                               |   |   |                                |   |   |                             |   |   |  |  |     |
| g. Work in a farm                                       | 1                                                                                                                                                                                                                                                                                                                                                             | 2                                                                                                                                                                                                                                                                                                                                                                                                                                                                                                                                                                                                                                                                                                                                                                                                                                                                                                                                                                                                                                                                                                                                                                                                                                                                                                                                                                                                                                                                                                                                                                                                                                                                                                                                                                                |                                                                                                                            |                                                                                              |     |                         |     |    |                                |   |   |                   |   |   |                         |   |   |                       |   |   |                         |   |   |                   |   |   |                             |   |   |                   |   |   |                      |   |   |                               |   |   |                                |   |   |                             |   |   |  |  |     |
| h. Packaging food or drinks                             | 1                                                                                                                                                                                                                                                                                                                                                             | 2                                                                                                                                                                                                                                                                                                                                                                                                                                                                                                                                                                                                                                                                                                                                                                                                                                                                                                                                                                                                                                                                                                                                                                                                                                                                                                                                                                                                                                                                                                                                                                                                                                                                                                                                                                                |                                                                                                                            |                                                                                              |     |                         |     |    |                                |   |   |                   |   |   |                         |   |   |                       |   |   |                         |   |   |                   |   |   |                             |   |   |                   |   |   |                      |   |   |                               |   |   |                                |   |   |                             |   |   |  |  |     |
| i. Selling things                                       | 1                                                                                                                                                                                                                                                                                                                                                             | 2                                                                                                                                                                                                                                                                                                                                                                                                                                                                                                                                                                                                                                                                                                                                                                                                                                                                                                                                                                                                                                                                                                                                                                                                                                                                                                                                                                                                                                                                                                                                                                                                                                                                                                                                                                                |                                                                                                                            |                                                                                              |     |                         |     |    |                                |   |   |                   |   |   |                         |   |   |                       |   |   |                         |   |   |                   |   |   |                             |   |   |                   |   |   |                      |   |   |                               |   |   |                                |   |   |                             |   |   |  |  |     |
| j. Work in an office                                    | 1                                                                                                                                                                                                                                                                                                                                                             | 2                                                                                                                                                                                                                                                                                                                                                                                                                                                                                                                                                                                                                                                                                                                                                                                                                                                                                                                                                                                                                                                                                                                                                                                                                                                                                                                                                                                                                                                                                                                                                                                                                                                                                                                                                                                |                                                                                                                            |                                                                                              |     |                         |     |    |                                |   |   |                   |   |   |                         |   |   |                       |   |   |                         |   |   |                   |   |   |                             |   |   |                   |   |   |                      |   |   |                               |   |   |                                |   |   |                             |   |   |  |  |     |
| k. Other type of own business                           | 1                                                                                                                                                                                                                                                                                                                                                             | 2                                                                                                                                                                                                                                                                                                                                                                                                                                                                                                                                                                                                                                                                                                                                                                                                                                                                                                                                                                                                                                                                                                                                                                                                                                                                                                                                                                                                                                                                                                                                                                                                                                                                                                                                                                                |                                                                                                                            |                                                                                              |     |                         |     |    |                                |   |   |                   |   |   |                         |   |   |                       |   |   |                         |   |   |                   |   |   |                             |   |   |                   |   |   |                      |   |   |                               |   |   |                                |   |   |                             |   |   |  |  |     |
| k. Other type of temporary job                          | 1                                                                                                                                                                                                                                                                                                                                                             | 2                                                                                                                                                                                                                                                                                                                                                                                                                                                                                                                                                                                                                                                                                                                                                                                                                                                                                                                                                                                                                                                                                                                                                                                                                                                                                                                                                                                                                                                                                                                                                                                                                                                                                                                                                                                |                                                                                                                            |                                                                                              |     |                         |     |    |                                |   |   |                   |   |   |                         |   |   |                       |   |   |                         |   |   |                   |   |   |                             |   |   |                   |   |   |                      |   |   |                               |   |   |                                |   |   |                             |   |   |  |  |     |
| l. Other type of employment                             | 1                                                                                                                                                                                                                                                                                                                                                             | 2                                                                                                                                                                                                                                                                                                                                                                                                                                                                                                                                                                                                                                                                                                                                                                                                                                                                                                                                                                                                                                                                                                                                                                                                                                                                                                                                                                                                                                                                                                                                                                                                                                                                                                                                                                                |                                                                                                                            |                                                                                              |     |                         |     |    |                                |   |   |                   |   |   |                         |   |   |                       |   |   |                         |   |   |                   |   |   |                             |   |   |                   |   |   |                      |   |   |                               |   |   |                                |   |   |                             |   |   |  |  |     |
| 407                                                     | I want to talk about the items that a person might own. Do you personally own or have these items?<br><br><br><b>[READ LIST; IF 'YES' ASK 408]</b>                                                                                                                                                                                                            | <p style="text-align: center;"><b>408</b></p> Who last gave you [ITEM], gave you money to buy this item, or purchased this item for you?<br><br><u>USE THE FOLLOWING CODES:</u><br>[DO NOT READ LIST]<br>SELF- WITH MONEY EARNED 1<br>MOTHER 2<br>FATHER 3<br>GUARDIAN 4<br>BOYFRIEND 5<br>HUSBAND 6<br>SUGAR DADDY 7<br>MALE FRIEND 8<br>FEMALE FRIEND 9<br>OTHER RELATIVE 10<br>TEACHER 11<br>OTHER (SPECIFY _____) 98                                                                                                                                                                                                                                                                                                                                                                                                                                                                                                                                                                                                                                                                                                                                                                                                                                                                                                                                                                                                                                                                                                                                                                                                                                                                                                                                                         |                                                                                                                            |                                                                                              | 407 |                         |     |    |                                |   |   |                   |   |   |                         |   |   |                       |   |   |                         |   |   |                   |   |   |                             |   |   |                   |   |   |                      |   |   |                               |   |   |                                |   |   |                             |   |   |  |  |     |
|                                                         |                                                                                                                                                                                                                                                                                                                                                               | YES NO                                                                                                                                                                                                                                                                                                                                                                                                                                                                                                                                                                                                                                                                                                                                                                                                                                                                                                                                                                                                                                                                                                                                                                                                                                                                                                                                                                                                                                                                                                                                                                                                                                                                                                                                                                           |                                                                                                                            | CODE                                                                                         |     |                         |     |    |                                |   |   |                   |   |   |                         |   |   |                       |   |   |                         |   |   |                   |   |   |                             |   |   |                   |   |   |                      |   |   |                               |   |   |                                |   |   |                             |   |   |  |  |     |
|                                                         | a. A PAIR OF SHOES                                                                                                                                                                                                                                                                                                                                            | 1 2                                                                                                                                                                                                                                                                                                                                                                                                                                                                                                                                                                                                                                                                                                                                                                                                                                                                                                                                                                                                                                                                                                                                                                                                                                                                                                                                                                                                                                                                                                                                                                                                                                                                                                                                                                              | a. A PAIR OF SHOES                                                                                                         | <table border="1" style="width: 40px; height: 20px;"> <tr><td> </td><td> </td></tr> </table> |     |                         |     |    |                                |   |   |                   |   |   |                         |   |   |                       |   |   |                         |   |   |                   |   |   |                             |   |   |                   |   |   |                      |   |   |                               |   |   |                                |   |   |                             |   |   |  |  |     |
|                                                         |                                                                                                                                                                                                                                                                                                                                                               |                                                                                                                                                                                                                                                                                                                                                                                                                                                                                                                                                                                                                                                                                                                                                                                                                                                                                                                                                                                                                                                                                                                                                                                                                                                                                                                                                                                                                                                                                                                                                                                                                                                                                                                                                                                  |                                                                                                                            |                                                                                              |     |                         |     |    |                                |   |   |                   |   |   |                         |   |   |                       |   |   |                         |   |   |                   |   |   |                             |   |   |                   |   |   |                      |   |   |                               |   |   |                                |   |   |                             |   |   |  |  |     |
|                                                         | b. SCHOOL UNIFORM                                                                                                                                                                                                                                                                                                                                             | 1 2                                                                                                                                                                                                                                                                                                                                                                                                                                                                                                                                                                                                                                                                                                                                                                                                                                                                                                                                                                                                                                                                                                                                                                                                                                                                                                                                                                                                                                                                                                                                                                                                                                                                                                                                                                              | b. SCHOOL UNIFORM                                                                                                          | <table border="1" style="width: 40px; height: 20px;"> <tr><td> </td><td> </td></tr> </table> |     |                         |     |    |                                |   |   |                   |   |   |                         |   |   |                       |   |   |                         |   |   |                   |   |   |                             |   |   |                   |   |   |                      |   |   |                               |   |   |                                |   |   |                             |   |   |  |  |     |
|                                                         |                                                                                                                                                                                                                                                                                                                                                               |                                                                                                                                                                                                                                                                                                                                                                                                                                                                                                                                                                                                                                                                                                                                                                                                                                                                                                                                                                                                                                                                                                                                                                                                                                                                                                                                                                                                                                                                                                                                                                                                                                                                                                                                                                                  |                                                                                                                            |                                                                                              |     |                         |     |    |                                |   |   |                   |   |   |                         |   |   |                       |   |   |                         |   |   |                   |   |   |                             |   |   |                   |   |   |                      |   |   |                               |   |   |                                |   |   |                             |   |   |  |  |     |
|                                                         | c. TWO SETS OF CLOTHES (OTHER THAN UNIFORM)                                                                                                                                                                                                                                                                                                                   | 1 2                                                                                                                                                                                                                                                                                                                                                                                                                                                                                                                                                                                                                                                                                                                                                                                                                                                                                                                                                                                                                                                                                                                                                                                                                                                                                                                                                                                                                                                                                                                                                                                                                                                                                                                                                                              | c. TWO SETS OF CLOTHES (OTHER THAN UNIFORM)                                                                                | <table border="1" style="width: 40px; height: 20px;"> <tr><td> </td><td> </td></tr> </table> |     |                         |     |    |                                |   |   |                   |   |   |                         |   |   |                       |   |   |                         |   |   |                   |   |   |                             |   |   |                   |   |   |                      |   |   |                               |   |   |                                |   |   |                             |   |   |  |  |     |
|                                                         |                                                                                                                                                                                                                                                                                                                                                               |                                                                                                                                                                                                                                                                                                                                                                                                                                                                                                                                                                                                                                                                                                                                                                                                                                                                                                                                                                                                                                                                                                                                                                                                                                                                                                                                                                                                                                                                                                                                                                                                                                                                                                                                                                                  |                                                                                                                            |                                                                                              |     |                         |     |    |                                |   |   |                   |   |   |                         |   |   |                       |   |   |                         |   |   |                   |   |   |                             |   |   |                   |   |   |                      |   |   |                               |   |   |                                |   |   |                             |   |   |  |  |     |
|                                                         | d. TWO UNDERWEARS                                                                                                                                                                                                                                                                                                                                             | 1 2                                                                                                                                                                                                                                                                                                                                                                                                                                                                                                                                                                                                                                                                                                                                                                                                                                                                                                                                                                                                                                                                                                                                                                                                                                                                                                                                                                                                                                                                                                                                                                                                                                                                                                                                                                              | d. TWO UNDERWEARS                                                                                                          | <table border="1" style="width: 40px; height: 20px;"> <tr><td> </td><td> </td></tr> </table> |     |                         |     |    |                                |   |   |                   |   |   |                         |   |   |                       |   |   |                         |   |   |                   |   |   |                             |   |   |                   |   |   |                      |   |   |                               |   |   |                                |   |   |                             |   |   |  |  |     |
|                                                         |                                                                                                                                                                                                                                                                                                                                                               |                                                                                                                                                                                                                                                                                                                                                                                                                                                                                                                                                                                                                                                                                                                                                                                                                                                                                                                                                                                                                                                                                                                                                                                                                                                                                                                                                                                                                                                                                                                                                                                                                                                                                                                                                                                  |                                                                                                                            |                                                                                              |     |                         |     |    |                                |   |   |                   |   |   |                         |   |   |                       |   |   |                         |   |   |                   |   |   |                             |   |   |                   |   |   |                      |   |   |                               |   |   |                                |   |   |                             |   |   |  |  |     |
|                                                         | e. A SCHOOL BAG                                                                                                                                                                                                                                                                                                                                               | 1 2                                                                                                                                                                                                                                                                                                                                                                                                                                                                                                                                                                                                                                                                                                                                                                                                                                                                                                                                                                                                                                                                                                                                                                                                                                                                                                                                                                                                                                                                                                                                                                                                                                                                                                                                                                              | e. A SCHOOL BAG                                                                                                            | <table border="1" style="width: 40px; height: 20px;"> <tr><td> </td><td> </td></tr> </table> |     |                         |     |    |                                |   |   |                   |   |   |                         |   |   |                       |   |   |                         |   |   |                   |   |   |                             |   |   |                   |   |   |                      |   |   |                               |   |   |                                |   |   |                             |   |   |  |  |     |
|                                                         |                                                                                                                                                                                                                                                                                                                                                               |                                                                                                                                                                                                                                                                                                                                                                                                                                                                                                                                                                                                                                                                                                                                                                                                                                                                                                                                                                                                                                                                                                                                                                                                                                                                                                                                                                                                                                                                                                                                                                                                                                                                                                                                                                                  |                                                                                                                            |                                                                                              |     |                         |     |    |                                |   |   |                   |   |   |                         |   |   |                       |   |   |                         |   |   |                   |   |   |                             |   |   |                   |   |   |                      |   |   |                               |   |   |                                |   |   |                             |   |   |  |  |     |

|     |                                                                                                                                                                                                                                                                                                                                        |                                                                                                                                                                                                                                                                                                                    |                                                                                                           |                                                                         |     |
|-----|----------------------------------------------------------------------------------------------------------------------------------------------------------------------------------------------------------------------------------------------------------------------------------------------------------------------------------------|--------------------------------------------------------------------------------------------------------------------------------------------------------------------------------------------------------------------------------------------------------------------------------------------------------------------|-----------------------------------------------------------------------------------------------------------|-------------------------------------------------------------------------|-----|
|     | f. SOME JEWELRY<br>1 2                                                                                                                                                                                                                                                                                                                 |                                                                                                                                                                                                                                                                                                                    | f. SOME JEWELRY                                                                                           | <input type="checkbox"/> <input type="checkbox"/>                       |     |
|     | g. A MOBILE TELEPHONE<br>1 2                                                                                                                                                                                                                                                                                                           |                                                                                                                                                                                                                                                                                                                    | g. A MOBILE TELEPHONE                                                                                     | <input type="checkbox"/> <input type="checkbox"/>                       |     |
|     | Now I am going to ask you several questions about different issues related to your use of any money you earned or money you were given, spending money, and savings. We know that some girls have money to spend and save and others don't. So, there are no <b>right</b> or <b>wrong</b> answers, just answer as honestly as you can. |                                                                                                                                                                                                                                                                                                                    |                                                                                                           |                                                                         |     |
| 409 | In the last one year, did you spend any money on your daily needs, other odds and ends, or other expenses?                                                                                                                                                                                                                             | YES<br>NO                                                                                                                                                                                                                                                                                                          | 1<br>2                                                                                                    | 412                                                                     | 409 |
| 410 | In the last one year, when you spent money on your daily needs, other odds and ends, or other expenses, where did you get that money from?<br><br>[RECORD ALL MENTIONED]                                                                                                                                                               |                                                                                                                                                                                                                                                                                                                    | YES<br>NO                                                                                                 |                                                                         | 410 |
|     |                                                                                                                                                                                                                                                                                                                                        | a. MOTHER<br>b. FATHER<br>c. GUARDIAN YOU LIVE WITH<br>d. OTHER RELATIVES<br>e. FRIEND<br>f. BOYFRIEND<br>g. HUSBAND<br>h. SUGAR DADDY<br>i. STRETCHING MONEY<br>j. OWN SAVINGS<br>k. SAVINGS GROUP/CHAMA<br>l. CASUAL JOBS/CHORES<br>m. STEADY JOB<br>n. CASH TRANSFERS<br>o. SPONSOR<br>p. OTHER (SPECIFY _____) | 1<br>1<br>1<br>1<br>1<br>1<br>1<br>1<br>1<br>1<br>1<br>1<br>1<br>1<br>1<br>1                              | 2<br>2<br>2<br>2<br>2<br>2<br>2<br>2<br>2<br>2<br>2<br>2<br>2<br>2<br>2 |     |
| 411 | In the past month, did you spend money on this item?<br>(READ EACH ITEM ALOUD. ASK YES OR NO)<br><br>(IF NO ON A, GO TO NEXT ITEM, SKIP B, C)<br>NOTE: Clarify if it is a personal spending need or for someone else if it is not clear from the type of expenditure)                                                                  |                                                                                                                                                                                                                                                                                                                    |                                                                                                           |                                                                         | 411 |
|     | A.<br>In the past month, did you spend money on this item?                                                                                                                                                                                                                                                                             | B.<br>About how much did you spend in one MONTH on this item?                                                                                                                                                                                                                                                      | C.<br>Do you decide to buy this item on your own, together with someone, or someone else decides for you? |                                                                         |     |
|     |                                                                                                                                                                                                                                                                                                                                        | Ksh                                                                                                                                                                                                                                                                                                                | 1 = YOU ALONE<br>2 = YOU TOGETHER WITH SOMEONE<br>3 = SOMEONE ELSE                                        |                                                                         |     |
| a   | FOOD, CHIPS, SWEETS, DRINKS/SODA FOR YOURSELF<br>YES 1<br>NO 2                                                                                                                                                                                                                                                                         |                                                                                                                                                                                                                                                                                                                    |                                                                                                           |                                                                         |     |
| b   | FOOD, CHIPS, SWEETS, DRINKS/SODA FOR SOMEONE ELSE<br>YES 1<br>NO 2                                                                                                                                                                                                                                                                     |                                                                                                                                                                                                                                                                                                                    |                                                                                                           |                                                                         |     |
| c   | CLOTHES/SHOES FOR YOURSELF<br>YES 1<br>NO 2                                                                                                                                                                                                                                                                                            |                                                                                                                                                                                                                                                                                                                    |                                                                                                           |                                                                         |     |
| d   | CLOTHES/SHOES FOR SOMEONE ELSE<br>YES 1<br>NO 2                                                                                                                                                                                                                                                                                        |                                                                                                                                                                                                                                                                                                                    |                                                                                                           |                                                                         |     |
| e   | SANITARY PADS<br>YES 1<br>NO 2                                                                                                                                                                                                                                                                                                         |                                                                                                                                                                                                                                                                                                                    |                                                                                                           |                                                                         |     |
| f   | BEAUTY PRODUCTS/SERVICES<br>YES 1<br>NO 2                                                                                                                                                                                                                                                                                              |                                                                                                                                                                                                                                                                                                                    |                                                                                                           |                                                                         |     |
| g   | CREDIT/AIRTIME<br>YES 1<br>NO 2                                                                                                                                                                                                                                                                                                        |                                                                                                                                                                                                                                                                                                                    |                                                                                                           |                                                                         |     |

|                                               | <table border="1"> <tr> <td>h ENTERTAINMENT</td> <td>YES 1</td> <td></td> <td></td> </tr> <tr> <td></td> <td>NO 2</td> <td></td> <td></td> </tr> <tr> <td>i TRANSPORT</td> <td>YES 1</td> <td></td> <td></td> </tr> <tr> <td></td> <td>NO 2</td> <td></td> <td></td> </tr> <tr> <td>j RENT</td> <td>YES 1</td> <td></td> <td></td> </tr> <tr> <td></td> <td>NO 2</td> <td></td> <td></td> </tr> </table> | h ENTERTAINMENT                                                                                                                                                                                                                                                                                                                                                                                                                                                                                                                                                                                                                                                                                                                                                                                                                                                                                                                                                                                                   | YES 1                                                                                                            |     |    |                   | NO 2 |   |                   | i TRANSPORT | YES 1 |                               |   |   | NO 2               |   |   | j RENT                    | YES 1 |   |                           |   | NO 2 |                          |   |   |                    |   |   |                          |   |   |                        |   |   |                              |   |    |                               |     |   |                    |   |   |                         |   |   |  |     |
|-----------------------------------------------|----------------------------------------------------------------------------------------------------------------------------------------------------------------------------------------------------------------------------------------------------------------------------------------------------------------------------------------------------------------------------------------------------------|-------------------------------------------------------------------------------------------------------------------------------------------------------------------------------------------------------------------------------------------------------------------------------------------------------------------------------------------------------------------------------------------------------------------------------------------------------------------------------------------------------------------------------------------------------------------------------------------------------------------------------------------------------------------------------------------------------------------------------------------------------------------------------------------------------------------------------------------------------------------------------------------------------------------------------------------------------------------------------------------------------------------|------------------------------------------------------------------------------------------------------------------|-----|----|-------------------|------|---|-------------------|-------------|-------|-------------------------------|---|---|--------------------|---|---|---------------------------|-------|---|---------------------------|---|------|--------------------------|---|---|--------------------|---|---|--------------------------|---|---|------------------------|---|---|------------------------------|---|----|-------------------------------|-----|---|--------------------|---|---|-------------------------|---|---|--|-----|
| h ENTERTAINMENT                               | YES 1                                                                                                                                                                                                                                                                                                                                                                                                    |                                                                                                                                                                                                                                                                                                                                                                                                                                                                                                                                                                                                                                                                                                                                                                                                                                                                                                                                                                                                                   |                                                                                                                  |     |    |                   |      |   |                   |             |       |                               |   |   |                    |   |   |                           |       |   |                           |   |      |                          |   |   |                    |   |   |                          |   |   |                        |   |   |                              |   |    |                               |     |   |                    |   |   |                         |   |   |  |     |
|                                               | NO 2                                                                                                                                                                                                                                                                                                                                                                                                     |                                                                                                                                                                                                                                                                                                                                                                                                                                                                                                                                                                                                                                                                                                                                                                                                                                                                                                                                                                                                                   |                                                                                                                  |     |    |                   |      |   |                   |             |       |                               |   |   |                    |   |   |                           |       |   |                           |   |      |                          |   |   |                    |   |   |                          |   |   |                        |   |   |                              |   |    |                               |     |   |                    |   |   |                         |   |   |  |     |
| i TRANSPORT                                   | YES 1                                                                                                                                                                                                                                                                                                                                                                                                    |                                                                                                                                                                                                                                                                                                                                                                                                                                                                                                                                                                                                                                                                                                                                                                                                                                                                                                                                                                                                                   |                                                                                                                  |     |    |                   |      |   |                   |             |       |                               |   |   |                    |   |   |                           |       |   |                           |   |      |                          |   |   |                    |   |   |                          |   |   |                        |   |   |                              |   |    |                               |     |   |                    |   |   |                         |   |   |  |     |
|                                               | NO 2                                                                                                                                                                                                                                                                                                                                                                                                     |                                                                                                                                                                                                                                                                                                                                                                                                                                                                                                                                                                                                                                                                                                                                                                                                                                                                                                                                                                                                                   |                                                                                                                  |     |    |                   |      |   |                   |             |       |                               |   |   |                    |   |   |                           |       |   |                           |   |      |                          |   |   |                    |   |   |                          |   |   |                        |   |   |                              |   |    |                               |     |   |                    |   |   |                         |   |   |  |     |
| j RENT                                        | YES 1                                                                                                                                                                                                                                                                                                                                                                                                    |                                                                                                                                                                                                                                                                                                                                                                                                                                                                                                                                                                                                                                                                                                                                                                                                                                                                                                                                                                                                                   |                                                                                                                  |     |    |                   |      |   |                   |             |       |                               |   |   |                    |   |   |                           |       |   |                           |   |      |                          |   |   |                    |   |   |                          |   |   |                        |   |   |                              |   |    |                               |     |   |                    |   |   |                         |   |   |  |     |
|                                               | NO 2                                                                                                                                                                                                                                                                                                                                                                                                     |                                                                                                                                                                                                                                                                                                                                                                                                                                                                                                                                                                                                                                                                                                                                                                                                                                                                                                                                                                                                                   |                                                                                                                  |     |    |                   |      |   |                   |             |       |                               |   |   |                    |   |   |                           |       |   |                           |   |      |                          |   |   |                    |   |   |                          |   |   |                        |   |   |                              |   |    |                               |     |   |                    |   |   |                         |   |   |  |     |
| 412                                           | In the past six months, have you saved, or put money aside to use at a later time?                                                                                                                                                                                                                                                                                                                       | YES 1<br>NO 2                                                                                                                                                                                                                                                                                                                                                                                                                                                                                                                                                                                                                                                                                                                                                                                                                                                                                                                                                                                                     | 417                                                                                                              | 412 |    |                   |      |   |                   |             |       |                               |   |   |                    |   |   |                           |       |   |                           |   |      |                          |   |   |                    |   |   |                          |   |   |                        |   |   |                              |   |    |                               |     |   |                    |   |   |                         |   |   |  |     |
| 413                                           | Would you say that you saved on a WEEKLY BASIS always, usually, sometimes, or never?                                                                                                                                                                                                                                                                                                                     | ALWAYS 1<br>USUALLY 2<br>SOMETIMES 3<br>NEVER 4                                                                                                                                                                                                                                                                                                                                                                                                                                                                                                                                                                                                                                                                                                                                                                                                                                                                                                                                                                   | 417                                                                                                              | 413 |    |                   |      |   |                   |             |       |                               |   |   |                    |   |   |                           |       |   |                           |   |      |                          |   |   |                    |   |   |                          |   |   |                        |   |   |                              |   |    |                               |     |   |                    |   |   |                         |   |   |  |     |
| 414                                           | In total, how many shillings do you currently have saved?                                                                                                                                                                                                                                                                                                                                                | KENYA SHILLINGS<br>DON'T KNOW                                                                                                                                                                                                                                                                                                                                                                                                                                                                                                                                                                                                                                                                                                                                                                                                                                                                                                                                                                                     | <input type="text"/> <input type="text"/> <input type="text"/> <input type="text"/> <input type="text"/><br>8888 | 414 |    |                   |      |   |                   |             |       |                               |   |   |                    |   |   |                           |       |   |                           |   |      |                          |   |   |                    |   |   |                          |   |   |                        |   |   |                              |   |    |                               |     |   |                    |   |   |                         |   |   |  |     |
| 415                                           | What are you saving for?<br><b>[DO NOT READ LIST]</b>                                                                                                                                                                                                                                                                                                                                                    | <p><b>CHECK ALL THAT APPLIES</b></p> <table border="1"> <thead> <tr> <th></th> <th>YES</th> <th>NO</th> </tr> </thead> <tbody> <tr><td>a. EMERGENCIES</td><td>1</td><td>2</td></tr> <tr><td>b. PERSONAL ITEMS</td><td>1</td><td>2</td></tr> <tr><td>c. HOUSEHOLD EXPENSES</td><td>1</td><td>2</td></tr> <tr><td>d. OWN SCHOOL FEES</td><td>1</td><td>2</td></tr> <tr><td>e. SCHOOL FEES FOR OTHERS</td><td>1</td><td>2</td></tr> <tr><td>f. SCHOOL SUPPLIES</td><td>1</td><td>2</td></tr> <tr><td>g. OWN BUSINESS</td><td>1</td><td>2</td></tr> <tr><td>h. FAMILY BUSINESS</td><td>1</td><td>2</td></tr> <tr><td>i. GENERAL FUTURE USE</td><td>1</td><td>2</td></tr> <tr><td>j. AGRICULTURAL INPUTS</td><td>1</td><td>2</td></tr> <tr><td>k. MEDICAL EXPENSES FOR SELF</td><td>1</td><td>2</td></tr> <tr><td>l. MEDICAL EXPENSES FOR OTHER</td><td>1</td><td>2</td></tr> <tr><td>m. TRANSPORT/TRIPS</td><td>1</td><td>2</td></tr> <tr><td>n. OTHER (SPECIFY_____)</td><td>1</td><td>2</td></tr> </tbody> </table> |                                                                                                                  | YES | NO | a. EMERGENCIES    | 1    | 2 | b. PERSONAL ITEMS | 1           | 2     | c. HOUSEHOLD EXPENSES         | 1 | 2 | d. OWN SCHOOL FEES | 1 | 2 | e. SCHOOL FEES FOR OTHERS | 1     | 2 | f. SCHOOL SUPPLIES        | 1 | 2    | g. OWN BUSINESS          | 1 | 2 | h. FAMILY BUSINESS | 1 | 2 | i. GENERAL FUTURE USE    | 1 | 2 | j. AGRICULTURAL INPUTS | 1 | 2 | k. MEDICAL EXPENSES FOR SELF | 1 | 2  | l. MEDICAL EXPENSES FOR OTHER | 1   | 2 | m. TRANSPORT/TRIPS | 1 | 2 | n. OTHER (SPECIFY_____) | 1 | 2 |  | 415 |
|                                               | YES                                                                                                                                                                                                                                                                                                                                                                                                      | NO                                                                                                                                                                                                                                                                                                                                                                                                                                                                                                                                                                                                                                                                                                                                                                                                                                                                                                                                                                                                                |                                                                                                                  |     |    |                   |      |   |                   |             |       |                               |   |   |                    |   |   |                           |       |   |                           |   |      |                          |   |   |                    |   |   |                          |   |   |                        |   |   |                              |   |    |                               |     |   |                    |   |   |                         |   |   |  |     |
| a. EMERGENCIES                                | 1                                                                                                                                                                                                                                                                                                                                                                                                        | 2                                                                                                                                                                                                                                                                                                                                                                                                                                                                                                                                                                                                                                                                                                                                                                                                                                                                                                                                                                                                                 |                                                                                                                  |     |    |                   |      |   |                   |             |       |                               |   |   |                    |   |   |                           |       |   |                           |   |      |                          |   |   |                    |   |   |                          |   |   |                        |   |   |                              |   |    |                               |     |   |                    |   |   |                         |   |   |  |     |
| b. PERSONAL ITEMS                             | 1                                                                                                                                                                                                                                                                                                                                                                                                        | 2                                                                                                                                                                                                                                                                                                                                                                                                                                                                                                                                                                                                                                                                                                                                                                                                                                                                                                                                                                                                                 |                                                                                                                  |     |    |                   |      |   |                   |             |       |                               |   |   |                    |   |   |                           |       |   |                           |   |      |                          |   |   |                    |   |   |                          |   |   |                        |   |   |                              |   |    |                               |     |   |                    |   |   |                         |   |   |  |     |
| c. HOUSEHOLD EXPENSES                         | 1                                                                                                                                                                                                                                                                                                                                                                                                        | 2                                                                                                                                                                                                                                                                                                                                                                                                                                                                                                                                                                                                                                                                                                                                                                                                                                                                                                                                                                                                                 |                                                                                                                  |     |    |                   |      |   |                   |             |       |                               |   |   |                    |   |   |                           |       |   |                           |   |      |                          |   |   |                    |   |   |                          |   |   |                        |   |   |                              |   |    |                               |     |   |                    |   |   |                         |   |   |  |     |
| d. OWN SCHOOL FEES                            | 1                                                                                                                                                                                                                                                                                                                                                                                                        | 2                                                                                                                                                                                                                                                                                                                                                                                                                                                                                                                                                                                                                                                                                                                                                                                                                                                                                                                                                                                                                 |                                                                                                                  |     |    |                   |      |   |                   |             |       |                               |   |   |                    |   |   |                           |       |   |                           |   |      |                          |   |   |                    |   |   |                          |   |   |                        |   |   |                              |   |    |                               |     |   |                    |   |   |                         |   |   |  |     |
| e. SCHOOL FEES FOR OTHERS                     | 1                                                                                                                                                                                                                                                                                                                                                                                                        | 2                                                                                                                                                                                                                                                                                                                                                                                                                                                                                                                                                                                                                                                                                                                                                                                                                                                                                                                                                                                                                 |                                                                                                                  |     |    |                   |      |   |                   |             |       |                               |   |   |                    |   |   |                           |       |   |                           |   |      |                          |   |   |                    |   |   |                          |   |   |                        |   |   |                              |   |    |                               |     |   |                    |   |   |                         |   |   |  |     |
| f. SCHOOL SUPPLIES                            | 1                                                                                                                                                                                                                                                                                                                                                                                                        | 2                                                                                                                                                                                                                                                                                                                                                                                                                                                                                                                                                                                                                                                                                                                                                                                                                                                                                                                                                                                                                 |                                                                                                                  |     |    |                   |      |   |                   |             |       |                               |   |   |                    |   |   |                           |       |   |                           |   |      |                          |   |   |                    |   |   |                          |   |   |                        |   |   |                              |   |    |                               |     |   |                    |   |   |                         |   |   |  |     |
| g. OWN BUSINESS                               | 1                                                                                                                                                                                                                                                                                                                                                                                                        | 2                                                                                                                                                                                                                                                                                                                                                                                                                                                                                                                                                                                                                                                                                                                                                                                                                                                                                                                                                                                                                 |                                                                                                                  |     |    |                   |      |   |                   |             |       |                               |   |   |                    |   |   |                           |       |   |                           |   |      |                          |   |   |                    |   |   |                          |   |   |                        |   |   |                              |   |    |                               |     |   |                    |   |   |                         |   |   |  |     |
| h. FAMILY BUSINESS                            | 1                                                                                                                                                                                                                                                                                                                                                                                                        | 2                                                                                                                                                                                                                                                                                                                                                                                                                                                                                                                                                                                                                                                                                                                                                                                                                                                                                                                                                                                                                 |                                                                                                                  |     |    |                   |      |   |                   |             |       |                               |   |   |                    |   |   |                           |       |   |                           |   |      |                          |   |   |                    |   |   |                          |   |   |                        |   |   |                              |   |    |                               |     |   |                    |   |   |                         |   |   |  |     |
| i. GENERAL FUTURE USE                         | 1                                                                                                                                                                                                                                                                                                                                                                                                        | 2                                                                                                                                                                                                                                                                                                                                                                                                                                                                                                                                                                                                                                                                                                                                                                                                                                                                                                                                                                                                                 |                                                                                                                  |     |    |                   |      |   |                   |             |       |                               |   |   |                    |   |   |                           |       |   |                           |   |      |                          |   |   |                    |   |   |                          |   |   |                        |   |   |                              |   |    |                               |     |   |                    |   |   |                         |   |   |  |     |
| j. AGRICULTURAL INPUTS                        | 1                                                                                                                                                                                                                                                                                                                                                                                                        | 2                                                                                                                                                                                                                                                                                                                                                                                                                                                                                                                                                                                                                                                                                                                                                                                                                                                                                                                                                                                                                 |                                                                                                                  |     |    |                   |      |   |                   |             |       |                               |   |   |                    |   |   |                           |       |   |                           |   |      |                          |   |   |                    |   |   |                          |   |   |                        |   |   |                              |   |    |                               |     |   |                    |   |   |                         |   |   |  |     |
| k. MEDICAL EXPENSES FOR SELF                  | 1                                                                                                                                                                                                                                                                                                                                                                                                        | 2                                                                                                                                                                                                                                                                                                                                                                                                                                                                                                                                                                                                                                                                                                                                                                                                                                                                                                                                                                                                                 |                                                                                                                  |     |    |                   |      |   |                   |             |       |                               |   |   |                    |   |   |                           |       |   |                           |   |      |                          |   |   |                    |   |   |                          |   |   |                        |   |   |                              |   |    |                               |     |   |                    |   |   |                         |   |   |  |     |
| l. MEDICAL EXPENSES FOR OTHER                 | 1                                                                                                                                                                                                                                                                                                                                                                                                        | 2                                                                                                                                                                                                                                                                                                                                                                                                                                                                                                                                                                                                                                                                                                                                                                                                                                                                                                                                                                                                                 |                                                                                                                  |     |    |                   |      |   |                   |             |       |                               |   |   |                    |   |   |                           |       |   |                           |   |      |                          |   |   |                    |   |   |                          |   |   |                        |   |   |                              |   |    |                               |     |   |                    |   |   |                         |   |   |  |     |
| m. TRANSPORT/TRIPS                            | 1                                                                                                                                                                                                                                                                                                                                                                                                        | 2                                                                                                                                                                                                                                                                                                                                                                                                                                                                                                                                                                                                                                                                                                                                                                                                                                                                                                                                                                                                                 |                                                                                                                  |     |    |                   |      |   |                   |             |       |                               |   |   |                    |   |   |                           |       |   |                           |   |      |                          |   |   |                    |   |   |                          |   |   |                        |   |   |                              |   |    |                               |     |   |                    |   |   |                         |   |   |  |     |
| n. OTHER (SPECIFY_____)                       | 1                                                                                                                                                                                                                                                                                                                                                                                                        | 2                                                                                                                                                                                                                                                                                                                                                                                                                                                                                                                                                                                                                                                                                                                                                                                                                                                                                                                                                                                                                 |                                                                                                                  |     |    |                   |      |   |                   |             |       |                               |   |   |                    |   |   |                           |       |   |                           |   |      |                          |   |   |                    |   |   |                          |   |   |                        |   |   |                              |   |    |                               |     |   |                    |   |   |                         |   |   |  |     |
| 416                                           | In the past <u>six months</u> , in which of the following places have you saved your money?                                                                                                                                                                                                                                                                                                              | <p><b>READ ALL OPTIONS</b></p> <table border="1"> <thead> <tr> <th></th> <th>YES</th> <th>NO</th> </tr> </thead> <tbody> <tr><td>BANK/BANK ACCOUNT</td><td>1</td><td>2</td></tr> <tr><td>SAVINGS ACCOUNT</td><td>1</td><td>2</td></tr> <tr><td>HOME/BANK/UNDER MATTRESS/HOLE</td><td>1</td><td>2</td></tr> <tr><td>BOX/CLOSET</td><td>1</td><td>2</td></tr> <tr><td>WITH A FRIEND</td><td>1</td><td>2</td></tr> <tr><td>WITH A PARENT OR GUARDIAN</td><td>1</td><td>2</td></tr> <tr><td>IN A SAVINGS GROUP/CHAMA</td><td>1</td><td>2</td></tr> <tr><td>SHOPKEEPER</td><td>1</td><td>2</td></tr> <tr><td>AGRICULTURAL INVESTMENTS</td><td>1</td><td>2</td></tr> <tr><td>MPESA</td><td>1</td><td>2</td></tr> <tr><td>OTHER (SPECIFY)</td><td></td><td>96</td></tr> </tbody> </table>                                                                                                                                                                                                                                |                                                                                                                  | YES | NO | BANK/BANK ACCOUNT | 1    | 2 | SAVINGS ACCOUNT   | 1           | 2     | HOME/BANK/UNDER MATTRESS/HOLE | 1 | 2 | BOX/CLOSET         | 1 | 2 | WITH A FRIEND             | 1     | 2 | WITH A PARENT OR GUARDIAN | 1 | 2    | IN A SAVINGS GROUP/CHAMA | 1 | 2 | SHOPKEEPER         | 1 | 2 | AGRICULTURAL INVESTMENTS | 1 | 2 | MPESA                  | 1 | 2 | OTHER (SPECIFY)              |   | 96 |                               | 416 |   |                    |   |   |                         |   |   |  |     |
|                                               | YES                                                                                                                                                                                                                                                                                                                                                                                                      | NO                                                                                                                                                                                                                                                                                                                                                                                                                                                                                                                                                                                                                                                                                                                                                                                                                                                                                                                                                                                                                |                                                                                                                  |     |    |                   |      |   |                   |             |       |                               |   |   |                    |   |   |                           |       |   |                           |   |      |                          |   |   |                    |   |   |                          |   |   |                        |   |   |                              |   |    |                               |     |   |                    |   |   |                         |   |   |  |     |
| BANK/BANK ACCOUNT                             | 1                                                                                                                                                                                                                                                                                                                                                                                                        | 2                                                                                                                                                                                                                                                                                                                                                                                                                                                                                                                                                                                                                                                                                                                                                                                                                                                                                                                                                                                                                 |                                                                                                                  |     |    |                   |      |   |                   |             |       |                               |   |   |                    |   |   |                           |       |   |                           |   |      |                          |   |   |                    |   |   |                          |   |   |                        |   |   |                              |   |    |                               |     |   |                    |   |   |                         |   |   |  |     |
| SAVINGS ACCOUNT                               | 1                                                                                                                                                                                                                                                                                                                                                                                                        | 2                                                                                                                                                                                                                                                                                                                                                                                                                                                                                                                                                                                                                                                                                                                                                                                                                                                                                                                                                                                                                 |                                                                                                                  |     |    |                   |      |   |                   |             |       |                               |   |   |                    |   |   |                           |       |   |                           |   |      |                          |   |   |                    |   |   |                          |   |   |                        |   |   |                              |   |    |                               |     |   |                    |   |   |                         |   |   |  |     |
| HOME/BANK/UNDER MATTRESS/HOLE                 | 1                                                                                                                                                                                                                                                                                                                                                                                                        | 2                                                                                                                                                                                                                                                                                                                                                                                                                                                                                                                                                                                                                                                                                                                                                                                                                                                                                                                                                                                                                 |                                                                                                                  |     |    |                   |      |   |                   |             |       |                               |   |   |                    |   |   |                           |       |   |                           |   |      |                          |   |   |                    |   |   |                          |   |   |                        |   |   |                              |   |    |                               |     |   |                    |   |   |                         |   |   |  |     |
| BOX/CLOSET                                    | 1                                                                                                                                                                                                                                                                                                                                                                                                        | 2                                                                                                                                                                                                                                                                                                                                                                                                                                                                                                                                                                                                                                                                                                                                                                                                                                                                                                                                                                                                                 |                                                                                                                  |     |    |                   |      |   |                   |             |       |                               |   |   |                    |   |   |                           |       |   |                           |   |      |                          |   |   |                    |   |   |                          |   |   |                        |   |   |                              |   |    |                               |     |   |                    |   |   |                         |   |   |  |     |
| WITH A FRIEND                                 | 1                                                                                                                                                                                                                                                                                                                                                                                                        | 2                                                                                                                                                                                                                                                                                                                                                                                                                                                                                                                                                                                                                                                                                                                                                                                                                                                                                                                                                                                                                 |                                                                                                                  |     |    |                   |      |   |                   |             |       |                               |   |   |                    |   |   |                           |       |   |                           |   |      |                          |   |   |                    |   |   |                          |   |   |                        |   |   |                              |   |    |                               |     |   |                    |   |   |                         |   |   |  |     |
| WITH A PARENT OR GUARDIAN                     | 1                                                                                                                                                                                                                                                                                                                                                                                                        | 2                                                                                                                                                                                                                                                                                                                                                                                                                                                                                                                                                                                                                                                                                                                                                                                                                                                                                                                                                                                                                 |                                                                                                                  |     |    |                   |      |   |                   |             |       |                               |   |   |                    |   |   |                           |       |   |                           |   |      |                          |   |   |                    |   |   |                          |   |   |                        |   |   |                              |   |    |                               |     |   |                    |   |   |                         |   |   |  |     |
| IN A SAVINGS GROUP/CHAMA                      | 1                                                                                                                                                                                                                                                                                                                                                                                                        | 2                                                                                                                                                                                                                                                                                                                                                                                                                                                                                                                                                                                                                                                                                                                                                                                                                                                                                                                                                                                                                 |                                                                                                                  |     |    |                   |      |   |                   |             |       |                               |   |   |                    |   |   |                           |       |   |                           |   |      |                          |   |   |                    |   |   |                          |   |   |                        |   |   |                              |   |    |                               |     |   |                    |   |   |                         |   |   |  |     |
| SHOPKEEPER                                    | 1                                                                                                                                                                                                                                                                                                                                                                                                        | 2                                                                                                                                                                                                                                                                                                                                                                                                                                                                                                                                                                                                                                                                                                                                                                                                                                                                                                                                                                                                                 |                                                                                                                  |     |    |                   |      |   |                   |             |       |                               |   |   |                    |   |   |                           |       |   |                           |   |      |                          |   |   |                    |   |   |                          |   |   |                        |   |   |                              |   |    |                               |     |   |                    |   |   |                         |   |   |  |     |
| AGRICULTURAL INVESTMENTS                      | 1                                                                                                                                                                                                                                                                                                                                                                                                        | 2                                                                                                                                                                                                                                                                                                                                                                                                                                                                                                                                                                                                                                                                                                                                                                                                                                                                                                                                                                                                                 |                                                                                                                  |     |    |                   |      |   |                   |             |       |                               |   |   |                    |   |   |                           |       |   |                           |   |      |                          |   |   |                    |   |   |                          |   |   |                        |   |   |                              |   |    |                               |     |   |                    |   |   |                         |   |   |  |     |
| MPESA                                         | 1                                                                                                                                                                                                                                                                                                                                                                                                        | 2                                                                                                                                                                                                                                                                                                                                                                                                                                                                                                                                                                                                                                                                                                                                                                                                                                                                                                                                                                                                                 |                                                                                                                  |     |    |                   |      |   |                   |             |       |                               |   |   |                    |   |   |                           |       |   |                           |   |      |                          |   |   |                    |   |   |                          |   |   |                        |   |   |                              |   |    |                               |     |   |                    |   |   |                         |   |   |  |     |
| OTHER (SPECIFY)                               |                                                                                                                                                                                                                                                                                                                                                                                                          | 96                                                                                                                                                                                                                                                                                                                                                                                                                                                                                                                                                                                                                                                                                                                                                                                                                                                                                                                                                                                                                |                                                                                                                  |     |    |                   |      |   |                   |             |       |                               |   |   |                    |   |   |                           |       |   |                           |   |      |                          |   |   |                    |   |   |                          |   |   |                        |   |   |                              |   |    |                               |     |   |                    |   |   |                         |   |   |  |     |
| 417                                           | Do you agree or disagree with the following statement: "Only people with a lot of money can save"?                                                                                                                                                                                                                                                                                                       | AGREE 1<br>DISAGREE 2                                                                                                                                                                                                                                                                                                                                                                                                                                                                                                                                                                                                                                                                                                                                                                                                                                                                                                                                                                                             |                                                                                                                  | 417 |    |                   |      |   |                   |             |       |                               |   |   |                    |   |   |                           |       |   |                           |   |      |                          |   |   |                    |   |   |                          |   |   |                        |   |   |                              |   |    |                               |     |   |                    |   |   |                         |   |   |  |     |
| <b>SECTION 5: SOCIAL CAPITAL AND NETWORKS</b> |                                                                                                                                                                                                                                                                                                                                                                                                          |                                                                                                                                                                                                                                                                                                                                                                                                                                                                                                                                                                                                                                                                                                                                                                                                                                                                                                                                                                                                                   |                                                                                                                  |     |    |                   |      |   |                   |             |       |                               |   |   |                    |   |   |                           |       |   |                           |   |      |                          |   |   |                    |   |   |                          |   |   |                        |   |   |                              |   |    |                               |     |   |                    |   |   |                         |   |   |  |     |
| <b>QUESTIONS</b>                              |                                                                                                                                                                                                                                                                                                                                                                                                          | <b>RESPONSES</b>                                                                                                                                                                                                                                                                                                                                                                                                                                                                                                                                                                                                                                                                                                                                                                                                                                                                                                                                                                                                  |                                                                                                                  |     |    |                   |      |   |                   |             |       |                               |   |   |                    |   |   |                           |       |   |                           |   |      |                          |   |   |                    |   |   |                          |   |   |                        |   |   |                              |   |    |                               |     |   |                    |   |   |                         |   |   |  |     |
| 501                                           | Are you a member of any social groups or clubs that you have attended within the last one year ? For instance, are you a member of                                                                                                                                                                                                                                                                       | 502<br>When is the last time you attended this club?                                                                                                                                                                                                                                                                                                                                                                                                                                                                                                                                                                                                                                                                                                                                                                                                                                                                                                                                                              | 503<br>Was it a girls only club or mixed girls and boys?                                                         | 501 |    |                   |      |   |                   |             |       |                               |   |   |                    |   |   |                           |       |   |                           |   |      |                          |   |   |                    |   |   |                          |   |   |                        |   |   |                              |   |    |                               |     |   |                    |   |   |                         |   |   |  |     |

| [READ LIST; IF 'YES' ASK 502 and 503]                                                                                                                                                                                                                                                                                               |                                                                                   | 1 = Within last 7 days<br>2 = Within the last month<br>3 = Within the last one year |             |            |                      |            |                        |  |
|-------------------------------------------------------------------------------------------------------------------------------------------------------------------------------------------------------------------------------------------------------------------------------------------------------------------------------------|-----------------------------------------------------------------------------------|-------------------------------------------------------------------------------------|-------------|------------|----------------------|------------|------------------------|--|
|                                                                                                                                                                                                                                                                                                                                     | YES                                                                               | NO                                                                                  | LAST 7 DAYS | LAST MONTH | IN THE LAST ONE YEAR | Girls Only | Mixed                  |  |
| a. Gender club                                                                                                                                                                                                                                                                                                                      | 1                                                                                 | 2                                                                                   | a. 1        | 2          | 3                    | a. 1       | 2                      |  |
| b. Child rights/Human rights                                                                                                                                                                                                                                                                                                        | 1                                                                                 | 2                                                                                   | b. 1        | 2          | 3                    | b. 1       | 2                      |  |
| c. HIV&AIDS/Health life skills/ Guidance & counseling club                                                                                                                                                                                                                                                                          | 1                                                                                 | 2                                                                                   | c. 1        | 2          | 3                    | c. 1       | 2                      |  |
| d. Girl guides/scouts                                                                                                                                                                                                                                                                                                               | 1                                                                                 | 2                                                                                   | d. 1        | 2          | 3                    | d. 1       | 2                      |  |
| e. Sports club                                                                                                                                                                                                                                                                                                                      | 1                                                                                 | 2                                                                                   | e. 1        | 2          | 3                    | e. 1       | 2                      |  |
| f. Drama or dancing group                                                                                                                                                                                                                                                                                                           | 1                                                                                 | 2                                                                                   | f. 1        | 2          | 3                    | f. 1       | 2                      |  |
| g. Church group/Muslim group                                                                                                                                                                                                                                                                                                        | 1                                                                                 | 2                                                                                   | g. 1        | 2          | 3                    | g. 1       | 2                      |  |
| h. Any other _____                                                                                                                                                                                                                                                                                                                  | 1                                                                                 | 2                                                                                   | h. 1        | 2          | 3                    | h. 1       | 2                      |  |
| <p><b>[FIRST ASK ALL QUESTIONS FOR MALES AND RECORD ANSWERS IN COLUMN A; THEN RETURN TO ASK ALL QUESTIONS FOR FEMALES AND RECORD ANSWERS IN COLUMN B]</b></p> <p>Now I want to ask about your good friends. What we mean by a good friend is someone you can confide in about personal matters and share important information.</p> |                                                                                   |                                                                                     |             |            |                      |            |                        |  |
| <b>[FRIENDS: 0-80; RECORD 80 IF MORE THAN 80; RECORD 88 IF DON'T KNOW]</b>                                                                                                                                                                                                                                                          |                                                                                   | <b>A. MALES</b>                                                                     |             |            | <b>B. FEMALES</b>    |            |                        |  |
| 504                                                                                                                                                                                                                                                                                                                                 | How many good friends do you have who are (MALE/FEMALE)?                          | <input type="text"/>                                                                |             |            | <input type="text"/> |            | [IF =A= 0 & B=0 → 507] |  |
| 505                                                                                                                                                                                                                                                                                                                                 | How many of these (MALE/FEMALE) friends are currently attending school?           | <input type="text"/>                                                                |             |            | <input type="text"/> |            | [IF = A=0 & B=0 → 507] |  |
| 506                                                                                                                                                                                                                                                                                                                                 | How many of these (MALE/FEMALE) friends are attending your school?                | <input type="text"/>                                                                |             |            | <input type="text"/> |            |                        |  |
| <b>SOCIAL ASSETS AND SAFETY NETS</b>                                                                                                                                                                                                                                                                                                |                                                                                   |                                                                                     |             |            |                      |            |                        |  |
| I am going to read you a few more statements and ask if you agree or disagree with them.                                                                                                                                                                                                                                            |                                                                                   |                                                                                     |             |            |                      |            |                        |  |
| 507                                                                                                                                                                                                                                                                                                                                 | I have many friends in my neighborhood/community                                  | AGREE<br>DISAGREE                                                                   |             |            | 1<br>2               |            |                        |  |
| 508                                                                                                                                                                                                                                                                                                                                 | I feel safe walking around in my neighborhood/community during the day            | AGREE<br>DISAGREE                                                                   |             |            | 1<br>2               |            |                        |  |
| 509                                                                                                                                                                                                                                                                                                                                 | I feel safe walking around in my neighborhood/community after dark                | AGREE<br>DISAGREE                                                                   |             |            | 1<br>2               |            |                        |  |
| 510                                                                                                                                                                                                                                                                                                                                 | People in my neighborhood/community trust one another                             | AGREE<br>DISAGREE                                                                   |             |            | 1<br>2               |            |                        |  |
| 511                                                                                                                                                                                                                                                                                                                                 | Sometimes, in my every day life, I feel scared that I will be raped               | AGREE<br>DISAGREE                                                                   |             |            | 1<br>2               |            |                        |  |
| 512                                                                                                                                                                                                                                                                                                                                 | I have been touched indecently by a boy or man in the past six months             | AGREE<br>DISAGREE                                                                   |             |            | 1<br>2               |            |                        |  |
| 513                                                                                                                                                                                                                                                                                                                                 | I have been robbed in the past six months while in my neighborhood/community      | AGREE<br>DISAGREE                                                                   |             |            | 1<br>2               |            |                        |  |
| 514                                                                                                                                                                                                                                                                                                                                 | I have been robbed in the past six months while outside my neighborhood/community | AGREE<br>DISAGREE                                                                   |             |            | 1<br>2               |            |                        |  |

| 515                 | In my neighborhood/community, boys or men tease me as I go about my day                                                                                                                                                                                                                                                                                                                                                                                                                                                                                                                                                                                                                                                                                                                                                                                                                                                                                                                                                                                                                                                                                                                                                                                                                                                                                                                                                                         | AGREE<br>DISAGREE                                                      | 1<br>2                                                                                                                                                                                                  |             | 515  |                      |                      |      |            |              |                     |   |   |   |   |   |                      |                      |           |   |   |   |   |   |                      |                      |            |   |   |   |   |   |                      |                      |                  |   |   |   |   |   |                      |                      |            |   |   |   |   |   |                      |                      |                     |   |   |   |   |   |                      |                      |          |   |   |   |   |   |                      |                      |           |   |   |   |   |   |                      |                      |  |
|---------------------|-------------------------------------------------------------------------------------------------------------------------------------------------------------------------------------------------------------------------------------------------------------------------------------------------------------------------------------------------------------------------------------------------------------------------------------------------------------------------------------------------------------------------------------------------------------------------------------------------------------------------------------------------------------------------------------------------------------------------------------------------------------------------------------------------------------------------------------------------------------------------------------------------------------------------------------------------------------------------------------------------------------------------------------------------------------------------------------------------------------------------------------------------------------------------------------------------------------------------------------------------------------------------------------------------------------------------------------------------------------------------------------------------------------------------------------------------|------------------------------------------------------------------------|---------------------------------------------------------------------------------------------------------------------------------------------------------------------------------------------------------|-------------|------|----------------------|----------------------|------|------------|--------------|---------------------|---|---|---|---|---|----------------------|----------------------|-----------|---|---|---|---|---|----------------------|----------------------|------------|---|---|---|---|---|----------------------|----------------------|------------------|---|---|---|---|---|----------------------|----------------------|------------|---|---|---|---|---|----------------------|----------------------|---------------------|---|---|---|---|---|----------------------|----------------------|----------|---|---|---|---|---|----------------------|----------------------|-----------|---|---|---|---|---|----------------------|----------------------|--|
| 516                 | I have a good friend in my community who I can turn to for help if I had a serious problem                                                                                                                                                                                                                                                                                                                                                                                                                                                                                                                                                                                                                                                                                                                                                                                                                                                                                                                                                                                                                                                                                                                                                                                                                                                                                                                                                      | AGREE<br>DISAGREE                                                      | 1<br>2                                                                                                                                                                                                  |             | 516  |                      |                      |      |            |              |                     |   |   |   |   |   |                      |                      |           |   |   |   |   |   |                      |                      |            |   |   |   |   |   |                      |                      |                  |   |   |   |   |   |                      |                      |            |   |   |   |   |   |                      |                      |                     |   |   |   |   |   |                      |                      |          |   |   |   |   |   |                      |                      |           |   |   |   |   |   |                      |                      |  |
| 517                 | There is a female adult in my community, other than my parents or teacher, whom I can turn to for help if I had a serious problem                                                                                                                                                                                                                                                                                                                                                                                                                                                                                                                                                                                                                                                                                                                                                                                                                                                                                                                                                                                                                                                                                                                                                                                                                                                                                                               | AGREE<br>DISAGREE                                                      | 1<br>2                                                                                                                                                                                                  |             | 517  |                      |                      |      |            |              |                     |   |   |   |   |   |                      |                      |           |   |   |   |   |   |                      |                      |            |   |   |   |   |   |                      |                      |                  |   |   |   |   |   |                      |                      |            |   |   |   |   |   |                      |                      |                     |   |   |   |   |   |                      |                      |          |   |   |   |   |   |                      |                      |           |   |   |   |   |   |                      |                      |  |
| 518                 | I have a good friend who I meet regularly in my life that I can discuss my problems and joys, and ask questions of.                                                                                                                                                                                                                                                                                                                                                                                                                                                                                                                                                                                                                                                                                                                                                                                                                                                                                                                                                                                                                                                                                                                                                                                                                                                                                                                             | AGREE<br>DISAGREE                                                      | 1<br>2                                                                                                                                                                                                  |             | 518  |                      |                      |      |            |              |                     |   |   |   |   |   |                      |                      |           |   |   |   |   |   |                      |                      |            |   |   |   |   |   |                      |                      |                  |   |   |   |   |   |                      |                      |            |   |   |   |   |   |                      |                      |                     |   |   |   |   |   |                      |                      |          |   |   |   |   |   |                      |                      |           |   |   |   |   |   |                      |                      |  |
| 519                 | There is a female adult, that is not my mother or teacher, who I meet regularly in my life that I can discuss my problems and joys, and ask questions of.                                                                                                                                                                                                                                                                                                                                                                                                                                                                                                                                                                                                                                                                                                                                                                                                                                                                                                                                                                                                                                                                                                                                                                                                                                                                                       | AGREE<br>DISAGREE                                                      | 1<br>2                                                                                                                                                                                                  |             | 519  |                      |                      |      |            |              |                     |   |   |   |   |   |                      |                      |           |   |   |   |   |   |                      |                      |            |   |   |   |   |   |                      |                      |                  |   |   |   |   |   |                      |                      |            |   |   |   |   |   |                      |                      |                     |   |   |   |   |   |                      |                      |          |   |   |   |   |   |                      |                      |           |   |   |   |   |   |                      |                      |  |
| 520                 | <b>Q520A</b><br>Could you count on the following people if you needed money urgently?<br><br><b>[READ THE LIST. IF NO ON Q520A, GO TO NEXT ITEM, SKIP Q520B, Q520C]</b>                                                                                                                                                                                                                                                                                                                                                                                                                                                                                                                                                                                                                                                                                                                                                                                                                                                                                                                                                                                                                                                                                                                                                                                                                                                                         | <b>Q520B</b><br>Sex                                                    | <b>Q520C</b><br>Residence/location (CODE)<br><br>CODES<br>1 Resides in my household<br>2 Resides in this community<br>3 Resides in neighboring community<br>4 Resides upcountry elsewhere/ (rural area) |             | 520  |                      |                      |      |            |              |                     |   |   |   |   |   |                      |                      |           |   |   |   |   |   |                      |                      |            |   |   |   |   |   |                      |                      |                  |   |   |   |   |   |                      |                      |            |   |   |   |   |   |                      |                      |                     |   |   |   |   |   |                      |                      |          |   |   |   |   |   |                      |                      |           |   |   |   |   |   |                      |                      |  |
|                     | <table border="1"> <thead> <tr> <th></th> <th>YES</th> <th>NO</th> <th>Male Only</th> <th>Female Only</th> <th>Both</th> <th>Male CODES</th> <th>Female CODES</th> </tr> </thead> <tbody> <tr> <td>A Parent/guardian</td> <td>1</td> <td>2</td> <td>1</td> <td>2</td> <td>3</td> <td><input type="text"/></td> <td><input type="text"/></td> </tr> <tr> <td>B Sibling</td> <td>1</td> <td>2</td> <td>1</td> <td>2</td> <td>3</td> <td><input type="text"/></td> <td><input type="text"/></td> </tr> <tr> <td>C Relative</td> <td>1</td> <td>2</td> <td>1</td> <td>2</td> <td>3</td> <td><input type="text"/></td> <td><input type="text"/></td> </tr> <tr> <td>D A close friend</td> <td>1</td> <td>2</td> <td>1</td> <td>2</td> <td>3</td> <td><input type="text"/></td> <td><input type="text"/></td> </tr> <tr> <td>E Neighbor</td> <td>1</td> <td>2</td> <td>1</td> <td>2</td> <td>3</td> <td><input type="text"/></td> <td><input type="text"/></td> </tr> <tr> <td>F Boyfriend/husband</td> <td>1</td> <td>2</td> <td>1</td> <td>2</td> <td>3</td> <td><input type="text"/></td> <td><input type="text"/></td> </tr> <tr> <td>G Mentor</td> <td>1</td> <td>2</td> <td>1</td> <td>2</td> <td>3</td> <td><input type="text"/></td> <td><input type="text"/></td> </tr> <tr> <td>H Teacher</td> <td>1</td> <td>2</td> <td>1</td> <td>2</td> <td>3</td> <td><input type="text"/></td> <td><input type="text"/></td> </tr> </tbody> </table>   |                                                                        | YES                                                                                                                                                                                                     | NO          |      | Male Only            | Female Only          | Both | Male CODES | Female CODES | A Parent/guardian   | 1 | 2 | 1 | 2 | 3 | <input type="text"/> | <input type="text"/> | B Sibling | 1 | 2 | 1 | 2 | 3 | <input type="text"/> | <input type="text"/> | C Relative | 1 | 2 | 1 | 2 | 3 | <input type="text"/> | <input type="text"/> | D A close friend | 1 | 2 | 1 | 2 | 3 | <input type="text"/> | <input type="text"/> | E Neighbor | 1 | 2 | 1 | 2 | 3 | <input type="text"/> | <input type="text"/> | F Boyfriend/husband | 1 | 2 | 1 | 2 | 3 | <input type="text"/> | <input type="text"/> | G Mentor | 1 | 2 | 1 | 2 | 3 | <input type="text"/> | <input type="text"/> | H Teacher | 1 | 2 | 1 | 2 | 3 | <input type="text"/> | <input type="text"/> |  |
|                     | YES                                                                                                                                                                                                                                                                                                                                                                                                                                                                                                                                                                                                                                                                                                                                                                                                                                                                                                                                                                                                                                                                                                                                                                                                                                                                                                                                                                                                                                             | NO                                                                     | Male Only                                                                                                                                                                                               | Female Only | Both | Male CODES           | Female CODES         |      |            |              |                     |   |   |   |   |   |                      |                      |           |   |   |   |   |   |                      |                      |            |   |   |   |   |   |                      |                      |                  |   |   |   |   |   |                      |                      |            |   |   |   |   |   |                      |                      |                     |   |   |   |   |   |                      |                      |          |   |   |   |   |   |                      |                      |           |   |   |   |   |   |                      |                      |  |
| A Parent/guardian   | 1                                                                                                                                                                                                                                                                                                                                                                                                                                                                                                                                                                                                                                                                                                                                                                                                                                                                                                                                                                                                                                                                                                                                                                                                                                                                                                                                                                                                                                               | 2                                                                      | 1                                                                                                                                                                                                       | 2           | 3    | <input type="text"/> | <input type="text"/> |      |            |              |                     |   |   |   |   |   |                      |                      |           |   |   |   |   |   |                      |                      |            |   |   |   |   |   |                      |                      |                  |   |   |   |   |   |                      |                      |            |   |   |   |   |   |                      |                      |                     |   |   |   |   |   |                      |                      |          |   |   |   |   |   |                      |                      |           |   |   |   |   |   |                      |                      |  |
| B Sibling           | 1                                                                                                                                                                                                                                                                                                                                                                                                                                                                                                                                                                                                                                                                                                                                                                                                                                                                                                                                                                                                                                                                                                                                                                                                                                                                                                                                                                                                                                               | 2                                                                      | 1                                                                                                                                                                                                       | 2           | 3    | <input type="text"/> | <input type="text"/> |      |            |              |                     |   |   |   |   |   |                      |                      |           |   |   |   |   |   |                      |                      |            |   |   |   |   |   |                      |                      |                  |   |   |   |   |   |                      |                      |            |   |   |   |   |   |                      |                      |                     |   |   |   |   |   |                      |                      |          |   |   |   |   |   |                      |                      |           |   |   |   |   |   |                      |                      |  |
| C Relative          | 1                                                                                                                                                                                                                                                                                                                                                                                                                                                                                                                                                                                                                                                                                                                                                                                                                                                                                                                                                                                                                                                                                                                                                                                                                                                                                                                                                                                                                                               | 2                                                                      | 1                                                                                                                                                                                                       | 2           | 3    | <input type="text"/> | <input type="text"/> |      |            |              |                     |   |   |   |   |   |                      |                      |           |   |   |   |   |   |                      |                      |            |   |   |   |   |   |                      |                      |                  |   |   |   |   |   |                      |                      |            |   |   |   |   |   |                      |                      |                     |   |   |   |   |   |                      |                      |          |   |   |   |   |   |                      |                      |           |   |   |   |   |   |                      |                      |  |
| D A close friend    | 1                                                                                                                                                                                                                                                                                                                                                                                                                                                                                                                                                                                                                                                                                                                                                                                                                                                                                                                                                                                                                                                                                                                                                                                                                                                                                                                                                                                                                                               | 2                                                                      | 1                                                                                                                                                                                                       | 2           | 3    | <input type="text"/> | <input type="text"/> |      |            |              |                     |   |   |   |   |   |                      |                      |           |   |   |   |   |   |                      |                      |            |   |   |   |   |   |                      |                      |                  |   |   |   |   |   |                      |                      |            |   |   |   |   |   |                      |                      |                     |   |   |   |   |   |                      |                      |          |   |   |   |   |   |                      |                      |           |   |   |   |   |   |                      |                      |  |
| E Neighbor          | 1                                                                                                                                                                                                                                                                                                                                                                                                                                                                                                                                                                                                                                                                                                                                                                                                                                                                                                                                                                                                                                                                                                                                                                                                                                                                                                                                                                                                                                               | 2                                                                      | 1                                                                                                                                                                                                       | 2           | 3    | <input type="text"/> | <input type="text"/> |      |            |              |                     |   |   |   |   |   |                      |                      |           |   |   |   |   |   |                      |                      |            |   |   |   |   |   |                      |                      |                  |   |   |   |   |   |                      |                      |            |   |   |   |   |   |                      |                      |                     |   |   |   |   |   |                      |                      |          |   |   |   |   |   |                      |                      |           |   |   |   |   |   |                      |                      |  |
| F Boyfriend/husband | 1                                                                                                                                                                                                                                                                                                                                                                                                                                                                                                                                                                                                                                                                                                                                                                                                                                                                                                                                                                                                                                                                                                                                                                                                                                                                                                                                                                                                                                               | 2                                                                      | 1                                                                                                                                                                                                       | 2           | 3    | <input type="text"/> | <input type="text"/> |      |            |              |                     |   |   |   |   |   |                      |                      |           |   |   |   |   |   |                      |                      |            |   |   |   |   |   |                      |                      |                  |   |   |   |   |   |                      |                      |            |   |   |   |   |   |                      |                      |                     |   |   |   |   |   |                      |                      |          |   |   |   |   |   |                      |                      |           |   |   |   |   |   |                      |                      |  |
| G Mentor            | 1                                                                                                                                                                                                                                                                                                                                                                                                                                                                                                                                                                                                                                                                                                                                                                                                                                                                                                                                                                                                                                                                                                                                                                                                                                                                                                                                                                                                                                               | 2                                                                      | 1                                                                                                                                                                                                       | 2           | 3    | <input type="text"/> | <input type="text"/> |      |            |              |                     |   |   |   |   |   |                      |                      |           |   |   |   |   |   |                      |                      |            |   |   |   |   |   |                      |                      |                  |   |   |   |   |   |                      |                      |            |   |   |   |   |   |                      |                      |                     |   |   |   |   |   |                      |                      |          |   |   |   |   |   |                      |                      |           |   |   |   |   |   |                      |                      |  |
| H Teacher           | 1                                                                                                                                                                                                                                                                                                                                                                                                                                                                                                                                                                                                                                                                                                                                                                                                                                                                                                                                                                                                                                                                                                                                                                                                                                                                                                                                                                                                                                               | 2                                                                      | 1                                                                                                                                                                                                       | 2           | 3    | <input type="text"/> | <input type="text"/> |      |            |              |                     |   |   |   |   |   |                      |                      |           |   |   |   |   |   |                      |                      |            |   |   |   |   |   |                      |                      |                  |   |   |   |   |   |                      |                      |            |   |   |   |   |   |                      |                      |                     |   |   |   |   |   |                      |                      |          |   |   |   |   |   |                      |                      |           |   |   |   |   |   |                      |                      |  |
| 521                 | <b>Q521A</b><br>Would you go to any of the following people if you had a question about your health or your body?<br><br><b>[READ THE LIST. IF NO ON Q521A, GO TO NEXT ITEM, SKIP Q521B, Q521C]</b>                                                                                                                                                                                                                                                                                                                                                                                                                                                                                                                                                                                                                                                                                                                                                                                                                                                                                                                                                                                                                                                                                                                                                                                                                                             | <b>Q521B</b><br>Sex                                                    | <b>Q521C</b><br>Residence/location (CODE)<br><br>1 Resides in my household<br>2 Resides in this community<br>3 Resides in neighboring community<br>4 Resides elsewhere/ upcountry (rural area)          |             | 521  |                      |                      |      |            |              |                     |   |   |   |   |   |                      |                      |           |   |   |   |   |   |                      |                      |            |   |   |   |   |   |                      |                      |                  |   |   |   |   |   |                      |                      |            |   |   |   |   |   |                      |                      |                     |   |   |   |   |   |                      |                      |          |   |   |   |   |   |                      |                      |           |   |   |   |   |   |                      |                      |  |
|                     | <table border="1"> <thead> <tr> <th></th> <th>YES</th> <th>NO</th> <th>Male Only</th> <th>Female Only</th> <th>Both</th> <th>Male CODES</th> <th>Female CODES</th> </tr> </thead> <tbody> <tr> <td>A Parent / Guardian</td> <td>1</td> <td>2</td> <td>1</td> <td>2</td> <td>3</td> <td><input type="text"/></td> <td><input type="text"/></td> </tr> <tr> <td>B Sibling</td> <td>1</td> <td>2</td> <td>1</td> <td>2</td> <td>3</td> <td><input type="text"/></td> <td><input type="text"/></td> </tr> <tr> <td>C Relative</td> <td>1</td> <td>2</td> <td>1</td> <td>2</td> <td>3</td> <td><input type="text"/></td> <td><input type="text"/></td> </tr> <tr> <td>D A close friend</td> <td>1</td> <td>2</td> <td>1</td> <td>2</td> <td>3</td> <td><input type="text"/></td> <td><input type="text"/></td> </tr> <tr> <td>E Neighbor</td> <td>1</td> <td>2</td> <td>1</td> <td>2</td> <td>3</td> <td><input type="text"/></td> <td><input type="text"/></td> </tr> <tr> <td>F Boyfriend/husband</td> <td>1</td> <td>2</td> <td>1</td> <td>2</td> <td>3</td> <td><input type="text"/></td> <td><input type="text"/></td> </tr> <tr> <td>G Mentor</td> <td>1</td> <td>2</td> <td>1</td> <td>2</td> <td>3</td> <td><input type="text"/></td> <td><input type="text"/></td> </tr> <tr> <td>H Teacher</td> <td>1</td> <td>2</td> <td>1</td> <td>2</td> <td>3</td> <td><input type="text"/></td> <td><input type="text"/></td> </tr> </tbody> </table> |                                                                        | YES                                                                                                                                                                                                     | NO          |      | Male Only            | Female Only          | Both | Male CODES | Female CODES | A Parent / Guardian | 1 | 2 | 1 | 2 | 3 | <input type="text"/> | <input type="text"/> | B Sibling | 1 | 2 | 1 | 2 | 3 | <input type="text"/> | <input type="text"/> | C Relative | 1 | 2 | 1 | 2 | 3 | <input type="text"/> | <input type="text"/> | D A close friend | 1 | 2 | 1 | 2 | 3 | <input type="text"/> | <input type="text"/> | E Neighbor | 1 | 2 | 1 | 2 | 3 | <input type="text"/> | <input type="text"/> | F Boyfriend/husband | 1 | 2 | 1 | 2 | 3 | <input type="text"/> | <input type="text"/> | G Mentor | 1 | 2 | 1 | 2 | 3 | <input type="text"/> | <input type="text"/> | H Teacher | 1 | 2 | 1 | 2 | 3 | <input type="text"/> | <input type="text"/> |  |
|                     | YES                                                                                                                                                                                                                                                                                                                                                                                                                                                                                                                                                                                                                                                                                                                                                                                                                                                                                                                                                                                                                                                                                                                                                                                                                                                                                                                                                                                                                                             | NO                                                                     | Male Only                                                                                                                                                                                               | Female Only | Both | Male CODES           | Female CODES         |      |            |              |                     |   |   |   |   |   |                      |                      |           |   |   |   |   |   |                      |                      |            |   |   |   |   |   |                      |                      |                  |   |   |   |   |   |                      |                      |            |   |   |   |   |   |                      |                      |                     |   |   |   |   |   |                      |                      |          |   |   |   |   |   |                      |                      |           |   |   |   |   |   |                      |                      |  |
| A Parent / Guardian | 1                                                                                                                                                                                                                                                                                                                                                                                                                                                                                                                                                                                                                                                                                                                                                                                                                                                                                                                                                                                                                                                                                                                                                                                                                                                                                                                                                                                                                                               | 2                                                                      | 1                                                                                                                                                                                                       | 2           | 3    | <input type="text"/> | <input type="text"/> |      |            |              |                     |   |   |   |   |   |                      |                      |           |   |   |   |   |   |                      |                      |            |   |   |   |   |   |                      |                      |                  |   |   |   |   |   |                      |                      |            |   |   |   |   |   |                      |                      |                     |   |   |   |   |   |                      |                      |          |   |   |   |   |   |                      |                      |           |   |   |   |   |   |                      |                      |  |
| B Sibling           | 1                                                                                                                                                                                                                                                                                                                                                                                                                                                                                                                                                                                                                                                                                                                                                                                                                                                                                                                                                                                                                                                                                                                                                                                                                                                                                                                                                                                                                                               | 2                                                                      | 1                                                                                                                                                                                                       | 2           | 3    | <input type="text"/> | <input type="text"/> |      |            |              |                     |   |   |   |   |   |                      |                      |           |   |   |   |   |   |                      |                      |            |   |   |   |   |   |                      |                      |                  |   |   |   |   |   |                      |                      |            |   |   |   |   |   |                      |                      |                     |   |   |   |   |   |                      |                      |          |   |   |   |   |   |                      |                      |           |   |   |   |   |   |                      |                      |  |
| C Relative          | 1                                                                                                                                                                                                                                                                                                                                                                                                                                                                                                                                                                                                                                                                                                                                                                                                                                                                                                                                                                                                                                                                                                                                                                                                                                                                                                                                                                                                                                               | 2                                                                      | 1                                                                                                                                                                                                       | 2           | 3    | <input type="text"/> | <input type="text"/> |      |            |              |                     |   |   |   |   |   |                      |                      |           |   |   |   |   |   |                      |                      |            |   |   |   |   |   |                      |                      |                  |   |   |   |   |   |                      |                      |            |   |   |   |   |   |                      |                      |                     |   |   |   |   |   |                      |                      |          |   |   |   |   |   |                      |                      |           |   |   |   |   |   |                      |                      |  |
| D A close friend    | 1                                                                                                                                                                                                                                                                                                                                                                                                                                                                                                                                                                                                                                                                                                                                                                                                                                                                                                                                                                                                                                                                                                                                                                                                                                                                                                                                                                                                                                               | 2                                                                      | 1                                                                                                                                                                                                       | 2           | 3    | <input type="text"/> | <input type="text"/> |      |            |              |                     |   |   |   |   |   |                      |                      |           |   |   |   |   |   |                      |                      |            |   |   |   |   |   |                      |                      |                  |   |   |   |   |   |                      |                      |            |   |   |   |   |   |                      |                      |                     |   |   |   |   |   |                      |                      |          |   |   |   |   |   |                      |                      |           |   |   |   |   |   |                      |                      |  |
| E Neighbor          | 1                                                                                                                                                                                                                                                                                                                                                                                                                                                                                                                                                                                                                                                                                                                                                                                                                                                                                                                                                                                                                                                                                                                                                                                                                                                                                                                                                                                                                                               | 2                                                                      | 1                                                                                                                                                                                                       | 2           | 3    | <input type="text"/> | <input type="text"/> |      |            |              |                     |   |   |   |   |   |                      |                      |           |   |   |   |   |   |                      |                      |            |   |   |   |   |   |                      |                      |                  |   |   |   |   |   |                      |                      |            |   |   |   |   |   |                      |                      |                     |   |   |   |   |   |                      |                      |          |   |   |   |   |   |                      |                      |           |   |   |   |   |   |                      |                      |  |
| F Boyfriend/husband | 1                                                                                                                                                                                                                                                                                                                                                                                                                                                                                                                                                                                                                                                                                                                                                                                                                                                                                                                                                                                                                                                                                                                                                                                                                                                                                                                                                                                                                                               | 2                                                                      | 1                                                                                                                                                                                                       | 2           | 3    | <input type="text"/> | <input type="text"/> |      |            |              |                     |   |   |   |   |   |                      |                      |           |   |   |   |   |   |                      |                      |            |   |   |   |   |   |                      |                      |                  |   |   |   |   |   |                      |                      |            |   |   |   |   |   |                      |                      |                     |   |   |   |   |   |                      |                      |          |   |   |   |   |   |                      |                      |           |   |   |   |   |   |                      |                      |  |
| G Mentor            | 1                                                                                                                                                                                                                                                                                                                                                                                                                                                                                                                                                                                                                                                                                                                                                                                                                                                                                                                                                                                                                                                                                                                                                                                                                                                                                                                                                                                                                                               | 2                                                                      | 1                                                                                                                                                                                                       | 2           | 3    | <input type="text"/> | <input type="text"/> |      |            |              |                     |   |   |   |   |   |                      |                      |           |   |   |   |   |   |                      |                      |            |   |   |   |   |   |                      |                      |                  |   |   |   |   |   |                      |                      |            |   |   |   |   |   |                      |                      |                     |   |   |   |   |   |                      |                      |          |   |   |   |   |   |                      |                      |           |   |   |   |   |   |                      |                      |  |
| H Teacher           | 1                                                                                                                                                                                                                                                                                                                                                                                                                                                                                                                                                                                                                                                                                                                                                                                                                                                                                                                                                                                                                                                                                                                                                                                                                                                                                                                                                                                                                                               | 2                                                                      | 1                                                                                                                                                                                                       | 2           | 3    | <input type="text"/> | <input type="text"/> |      |            |              |                     |   |   |   |   |   |                      |                      |           |   |   |   |   |   |                      |                      |            |   |   |   |   |   |                      |                      |                  |   |   |   |   |   |                      |                      |            |   |   |   |   |   |                      |                      |                     |   |   |   |   |   |                      |                      |          |   |   |   |   |   |                      |                      |           |   |   |   |   |   |                      |                      |  |
|                     | For each of the following places, please tell me whether you are usually permitted to go to them on your own, only if someone accompanies you, or not at all                                                                                                                                                                                                                                                                                                                                                                                                                                                                                                                                                                                                                                                                                                                                                                                                                                                                                                                                                                                                                                                                                                                                                                                                                                                                                    |                                                                        |                                                                                                                                                                                                         |             |      |                      |                      |      |            |              |                     |   |   |   |   |   |                      |                      |           |   |   |   |   |   |                      |                      |            |   |   |   |   |   |                      |                      |                  |   |   |   |   |   |                      |                      |            |   |   |   |   |   |                      |                      |                     |   |   |   |   |   |                      |                      |          |   |   |   |   |   |                      |                      |           |   |   |   |   |   |                      |                      |  |
| 522                 | Local Health Clinic                                                                                                                                                                                                                                                                                                                                                                                                                                                                                                                                                                                                                                                                                                                                                                                                                                                                                                                                                                                                                                                                                                                                                                                                                                                                                                                                                                                                                             | ON MY OWN<br>IF SOMEONE ACCOMPANIES ME<br>NOT AT ALL<br>NEVER GO THERE | 1<br>2<br>3<br>9                                                                                                                                                                                        |             | 522  |                      |                      |      |            |              |                     |   |   |   |   |   |                      |                      |           |   |   |   |   |   |                      |                      |            |   |   |   |   |   |                      |                      |                  |   |   |   |   |   |                      |                      |            |   |   |   |   |   |                      |                      |                     |   |   |   |   |   |                      |                      |          |   |   |   |   |   |                      |                      |           |   |   |   |   |   |                      |                      |  |
| 523                 | Homes of friends in my neighborhood                                                                                                                                                                                                                                                                                                                                                                                                                                                                                                                                                                                                                                                                                                                                                                                                                                                                                                                                                                                                                                                                                                                                                                                                                                                                                                                                                                                                             | ON MY OWN<br>IF SOMEONE ACCOMPANIES ME                                 | 1<br>2                                                                                                                                                                                                  |             | 523  |                      |                      |      |            |              |                     |   |   |   |   |   |                      |                      |           |   |   |   |   |   |                      |                      |            |   |   |   |   |   |                      |                      |                  |   |   |   |   |   |                      |                      |            |   |   |   |   |   |                      |                      |                     |   |   |   |   |   |                      |                      |          |   |   |   |   |   |                      |                      |           |   |   |   |   |   |                      |                      |  |

|     |                                                                                                                                                                                                                                                                                                                                                                                                                              |                                                                                                                                                                                                                                                                                                                                                                                                                                                                                          |                                                                               |     |     |
|-----|------------------------------------------------------------------------------------------------------------------------------------------------------------------------------------------------------------------------------------------------------------------------------------------------------------------------------------------------------------------------------------------------------------------------------|------------------------------------------------------------------------------------------------------------------------------------------------------------------------------------------------------------------------------------------------------------------------------------------------------------------------------------------------------------------------------------------------------------------------------------------------------------------------------------------|-------------------------------------------------------------------------------|-----|-----|
|     |                                                                                                                                                                                                                                                                                                                                                                                                                              | NOT AT ALL<br>NEVER GO THERE                                                                                                                                                                                                                                                                                                                                                                                                                                                             | 3<br>9                                                                        |     |     |
| 524 | Youth Group/Girls Group                                                                                                                                                                                                                                                                                                                                                                                                      | ON MY OWN<br>IF SOMEONE ACCOMPANIES ME<br>NOT AT ALL<br>NEVER GO THERE                                                                                                                                                                                                                                                                                                                                                                                                                   | 1<br>2<br>3<br>9                                                              |     | 524 |
| 525 | Many different factors can prevent girls from getting medical advice or treatment for themselves. When you are sick and want to get medical advice or treatment, is each of the following a big problem or not?<br><br><b>[READ THE LIST]</b>                                                                                                                                                                                |                                                                                                                                                                                                                                                                                                                                                                                                                                                                                          |                                                                               |     | 525 |
|     |                                                                                                                                                                                                                                                                                                                                                                                                                              |                                                                                                                                                                                                                                                                                                                                                                                                                                                                                          | <b>BIG PROBLEM</b><br>YES NO                                                  |     |     |
|     | a. Getting permission to go?                                                                                                                                                                                                                                                                                                                                                                                                 | a. PERMISSION                                                                                                                                                                                                                                                                                                                                                                                                                                                                            | 1 2                                                                           |     |     |
|     | b. Getting money needed for treatment?                                                                                                                                                                                                                                                                                                                                                                                       | b. MONEY                                                                                                                                                                                                                                                                                                                                                                                                                                                                                 | 1 2                                                                           |     |     |
|     | c. The distance to the health facility?                                                                                                                                                                                                                                                                                                                                                                                      | c. DISTANCE                                                                                                                                                                                                                                                                                                                                                                                                                                                                              | 1 2                                                                           |     |     |
|     | d. Having to take transport?                                                                                                                                                                                                                                                                                                                                                                                                 | d. TRANSPORT                                                                                                                                                                                                                                                                                                                                                                                                                                                                             | 1 2                                                                           |     |     |
|     | e. Not wanting to go alone?                                                                                                                                                                                                                                                                                                                                                                                                  | e. GO ALONE                                                                                                                                                                                                                                                                                                                                                                                                                                                                              | 1 2                                                                           |     |     |
|     | f. Concern that there may not be a female health provider?                                                                                                                                                                                                                                                                                                                                                                   | f. NO FEMALE PROVIDER                                                                                                                                                                                                                                                                                                                                                                                                                                                                    | 1 2                                                                           |     |     |
|     | g. Concern that there may not be any health provider?                                                                                                                                                                                                                                                                                                                                                                        | g. NO PROVIDER                                                                                                                                                                                                                                                                                                                                                                                                                                                                           | 1 2                                                                           |     |     |
|     | h. Concern that there may be no drugs available?                                                                                                                                                                                                                                                                                                                                                                             | h. NO DRUGS                                                                                                                                                                                                                                                                                                                                                                                                                                                                              | 1 2                                                                           |     |     |
|     | i. Concern about lack of privacy/confidentiality                                                                                                                                                                                                                                                                                                                                                                             | i. LACK OF PRIVACY/CONFIDENTIALITY                                                                                                                                                                                                                                                                                                                                                                                                                                                       | 1 2                                                                           |     |     |
|     | j. Fear of judgement from the health provider                                                                                                                                                                                                                                                                                                                                                                                | j. JUDGEMENT BY PROVIDER                                                                                                                                                                                                                                                                                                                                                                                                                                                                 | 1 2                                                                           |     |     |
|     | k. Embarrassed to discuss the health issue                                                                                                                                                                                                                                                                                                                                                                                   | k. EMBARRASSMENT                                                                                                                                                                                                                                                                                                                                                                                                                                                                         | 1 2                                                                           |     |     |
| 526 | In the past six months, did you go to a health facility to get any type of health services?                                                                                                                                                                                                                                                                                                                                  | YES<br>NO                                                                                                                                                                                                                                                                                                                                                                                                                                                                                | 1<br>2                                                                        | 529 | 526 |
| 527 | Which of the following health facilities did you visit in the past six months?<br><br><b>[Read the list, Check all that apply]</b>                                                                                                                                                                                                                                                                                           | PRIVATE CLINIC<br>PUBLIC HOSPITAL<br>PUBLIC HEALTH CENTER/CLINIC<br>DISPENSARY<br>CHEMIST/PHARMACY<br>MOBILE/OUTREACH SERVICE<br>NGO FACILITY<br>OTHER (SPECIFY) .....                                                                                                                                                                                                                                                                                                                   | 1<br>2<br>3<br>4<br>5<br>6<br>7<br>98                                         |     | 527 |
| 528 | Please tell me which health services you received during those visits?<br><br><b>[RECORD ALL MENTIONED]</b>                                                                                                                                                                                                                                                                                                                  | <b>SERVICE CODES</b><br>a. GENERAL HEALTH/ SICKNESS (e.g. malaria, diarrhea, cold)<br>b. FAMILY PLANNING<br>c. PREGNANCY TEST<br>d. ANTENATAL CARE<br>e. HIV TESTING<br>f. HIV CARE/TREATMENT<br>g. STI TESTING (NON-HIV)<br>h. STI CARE/TREATMENT ( NON-HIV)<br>i. CHILD HEALTH/SICKNESS<br>j. DELIVERY<br>k. POSTNATAL CARE<br>l. URINARY TRACT INFECTIONS (UTIs) CARE/TREATMENT<br>I. OTHER REPRODUCTIVE HEALTH SERVICES<br>m. PHARMACY/VITAMINS/MEDICINE<br>o. OTHER (SPECIFY _____) | 1<br>2<br>3<br>4<br>5<br>6<br>7<br>8<br>9<br>10<br>11<br>12<br>13<br>14<br>98 |     | 528 |
| 529 | I want you to think about your most recent weekday, from Monday through Friday, that was not a public holiday or a school holiday and try to recall the different activities you did on that day. Tell me about the different activities you did and how long you spent on them.<br><br><b>[RECORD HOW MANY HOURS SHE SPENT ON VARIOUS ACTIVITIES DURING THE LAST COMPLETE WEEKDAY - NOT SATURDAY OR SUNDAY OR HOLIDAY.]</b> | <b>ACTIVITY</b>                                                                                                                                                                                                                                                                                                                                                                                                                                                                          | <b>NUMBER OF MINUTES</b>                                                      |     | 529 |
|     |                                                                                                                                                                                                                                                                                                                                                                                                                              | a. In school                                                                                                                                                                                                                                                                                                                                                                                                                                                                             | <input type="text"/>                                                          |     |     |
|     |                                                                                                                                                                                                                                                                                                                                                                                                                              | b. Unpaid work at home (e.g. cooking, cleaning, washing clothes)                                                                                                                                                                                                                                                                                                                                                                                                                         | <input type="text"/>                                                          |     |     |
|     |                                                                                                                                                                                                                                                                                                                                                                                                                              | c. Unpaid work outside the home (e.g. going to the market, fetching water)                                                                                                                                                                                                                                                                                                                                                                                                               | <input type="text"/>                                                          |     |     |
|     |                                                                                                                                                                                                                                                                                                                                                                                                                              | d. Paid wage work/ paid work for others/In own business                                                                                                                                                                                                                                                                                                                                                                                                                                  | <input type="text"/>                                                          |     |     |

|                                                                         |                                                                                                                                                                                  |                                                                                                             |                           |                          |                             |
|-------------------------------------------------------------------------|----------------------------------------------------------------------------------------------------------------------------------------------------------------------------------|-------------------------------------------------------------------------------------------------------------|---------------------------|--------------------------|-----------------------------|
|                                                                         |                                                                                                                                                                                  | e. Leisure time (chatting with friends, drinking tea/coffee with friends, watching TV, reading novels, etc) | <input type="text"/>      |                          |                             |
|                                                                         |                                                                                                                                                                                  | f. Church/mosque/praying/duksi/madrassa                                                                     | <input type="text"/>      |                          |                             |
|                                                                         |                                                                                                                                                                                  | g. Studying/homework                                                                                        | <input type="text"/>      |                          |                             |
|                                                                         |                                                                                                                                                                                  | h. Travelling to and from school                                                                            | <input type="text"/>      |                          |                             |
|                                                                         |                                                                                                                                                                                  | i. Sleeping                                                                                                 | <input type="text"/>      |                          |                             |
|                                                                         |                                                                                                                                                                                  | TOTAL MINUTES [CHECK NOT MORE THAN 1440]                                                                    | <input type="text"/>      |                          |                             |
| <b>SECTION 6: SELF-EFFICACY, LOCUS OF CONTROL, AND GENDER ATTITUDES</b> |                                                                                                                                                                                  |                                                                                                             |                           |                          |                             |
|                                                                         | <b>QUESTIONS</b>                                                                                                                                                                 |                                                                                                             |                           |                          | <b>RESPONSES</b>            |
|                                                                         | <b>Generalized Self Efficacy</b>                                                                                                                                                 |                                                                                                             |                           |                          |                             |
| 601                                                                     | Now, I am going to read you some statements, please tell me if you agree or disagree with them.                                                                                  |                                                                                                             |                           |                          |                             |
|                                                                         |                                                                                                                                                                                  |                                                                                                             | <b>AGREE</b>              | <b>DISAGREE</b>          | <b>DON'T KNOW</b>           |
|                                                                         | a. You always manage to solve difficult problems if you try hard enough.                                                                                                         |                                                                                                             | 1                         | 2                        | 88                          |
|                                                                         | b. If someone is against you, you can still find ways to get what you want.                                                                                                      |                                                                                                             | 1                         | 2                        | 88                          |
|                                                                         | c. It is easy for you to focus on your aims and accomplish your goals                                                                                                            |                                                                                                             | 1                         | 2                        | 88                          |
|                                                                         | d. You are confident that you could handle unexpected events very well                                                                                                           |                                                                                                             | 1                         | 2                        | 88                          |
|                                                                         | e. Because of the help you can get, you know how to manage unexpected situations.                                                                                                |                                                                                                             | 1                         | 2                        | 88                          |
|                                                                         | f. You can solve most problems if you make the necessary effort.                                                                                                                 |                                                                                                             | 1                         | 2                        | 88                          |
|                                                                         | g. You can remain calm when facing difficulties because you can rely on your own abilities.                                                                                      |                                                                                                             | 1                         | 2                        | 88                          |
|                                                                         | h. When you face a problem, you can usually find more than one solution.                                                                                                         |                                                                                                             | 1                         | 2                        | 88                          |
|                                                                         | i. If you are in trouble, you can usually think of a solution.                                                                                                                   |                                                                                                             | 1                         | 2                        | 88                          |
|                                                                         | j. You can usually handle any situation that comes your way.                                                                                                                     |                                                                                                             | 1                         | 2                        | 88                          |
| 602                                                                     | <b>Self-Efficacy (India Transition Study)</b>                                                                                                                                    |                                                                                                             |                           |                          |                             |
|                                                                         | Do you express your opinion to elders in your family? Would you say often, sometimes or never?                                                                                   | OFTEN<br>SOMETIMES<br>NEVER                                                                                 |                           |                          | 1<br>2<br>3                 |
| 603                                                                     | If you disagree with someone, do you usually tell that person that you disagree with him/her? Would you say you always confront, sometimes give a response or always stay quiet? | ALWAYS CONFRONT<br>SOMETIMES GIVE RESPONSE<br>ALWAYS,STAY QUIET                                             |                           |                          | 1<br>2<br>3                 |
| 604                                                                     | Suppose, a boy or man tries to touch you on your private parts, when you did not want. Would you be able to say 'NO' to that person?                                             | YES<br>NO                                                                                                   |                           |                          | 1<br>2                      |
| 605                                                                     | Do you feel confident about speaking in front of a group of people of your age? Would you say always, sometimes or never?                                                        | ALWAYS<br>SOMETIMES<br>NEVER                                                                                |                           |                          | 1<br>2<br>3                 |
| 606                                                                     | <b>For each of the following statements, please tell me if you AGREE A LOT, AGREE ALITTLE, DISAGREE ALITTLE OR DISAGREE A LOT</b>                                                |                                                                                                             |                           |                          |                             |
|                                                                         | <b>Locus of Control</b>                                                                                                                                                          |                                                                                                             | <b>AGREE<br/>A LOT</b>    | <b>AGREE<br/>ALITTLE</b> | <b>DISAGREE<br/>ALITTLE</b> |
|                                                                         |                                                                                                                                                                                  |                                                                                                             | <b>DISAGREE<br/>A LOT</b> |                          | <b>DON'T KNOW</b>           |
|                                                                         | a. To a great extent, the important things that happen in my life happen by chance (reverse scored).                                                                             |                                                                                                             | 1                         | 2                        | 3                           |
|                                                                         |                                                                                                                                                                                  |                                                                                                             |                           | 4                        | 88                          |
|                                                                         | b. My success so far in my life is due to my ability and hard work.                                                                                                              |                                                                                                             | 1                         | 2                        | 3                           |
|                                                                         |                                                                                                                                                                                  |                                                                                                             |                           | 4                        | 88                          |
|                                                                         | c. Whether or not I succeed in the KCPE exam will depend on my actions and what I do.                                                                                            |                                                                                                             | 1                         | 2                        | 3                           |
|                                                                         |                                                                                                                                                                                  |                                                                                                             |                           | 4                        | 88                          |
|                                                                         | d. When I succeed it is often due to luck and when I fail it is often due to how powerful other people are (reverse scored).                                                     |                                                                                                             | 1                         | 2                        | 3                           |
|                                                                         |                                                                                                                                                                                  |                                                                                                             |                           | 4                        | 88                          |
|                                                                         | e. If I succeed in achieving my goals in life it will be because of how well I prepared myself.                                                                                  |                                                                                                             | 1                         | 2                        | 3                           |
|                                                                         |                                                                                                                                                                                  |                                                                                                             |                           | 4                        | 88                          |
|                                                                         | f. Most of my problems will go away if I just ignore them (reverse scored)                                                                                                       |                                                                                                             | 1                         | 2                        | 3                           |
|                                                                         |                                                                                                                                                                                  |                                                                                                             |                           | 4                        | 88                          |



| GENDER NORMS (GEAS)                                                                                                        |                                                                                                 |                                                                                    |                  |                     |                   |                                         |     |
|----------------------------------------------------------------------------------------------------------------------------|-------------------------------------------------------------------------------------------------|------------------------------------------------------------------------------------|------------------|---------------------|-------------------|-----------------------------------------|-----|
| For each of the following statements, please tell me if you AGREE A LOT, AGREE ALITTLE, DISAGREE ALITTLE OR DISAGREE A LOT |                                                                                                 |                                                                                    |                  |                     |                   |                                         |     |
| 607                                                                                                                        |                                                                                                 | AGREE<br>A LOT                                                                     | AGREE<br>ALITTLE | DISAGREE<br>ALITTLE | DISAGREE<br>A LOT | DON'T KNOW                              | 607 |
|                                                                                                                            | <b>Girls Freedom Versus Lack of Independence</b>                                                |                                                                                    |                  |                     |                   |                                         |     |
|                                                                                                                            | a. Girls should be as independent as boys                                                       | 1                                                                                  | 2                | 3                   | 4                 | 88                                      |     |
|                                                                                                                            | b. Girls should not go out with their friends unless an adult is present                        | 1                                                                                  | 2                | 3                   | 4                 | 88                                      |     |
|                                                                                                                            | c. Girls feel they are more limited in what they can do and where they can go than boys         | 1                                                                                  | 2                | 3                   | 4                 | 88                                      |     |
|                                                                                                                            | d. Girls should have the same chances/opportunities as boys                                     | 1                                                                                  | 2                | 3                   | 4                 | 88                                      |     |
|                                                                                                                            | e. Girls should be able to move about as freely as boys                                         | 1                                                                                  | 2                | 3                   | 4                 | 88                                      |     |
|                                                                                                                            | <b>Girls Responsibilities</b>                                                                   |                                                                                    |                  |                     |                   |                                         |     |
|                                                                                                                            | f. It is as important for girls to do well in school as it is for boys                          | 1                                                                                  | 2                | 3                   | 4                 | 88                                      |     |
|                                                                                                                            | g. Boys and girls should be equally responsible for household chores                            | 1                                                                                  | 2                | 3                   | 4                 | 88                                      |     |
|                                                                                                                            | <b>Deference/Proper/Composed</b>                                                                |                                                                                    |                  |                     |                   |                                         |     |
|                                                                                                                            | h. Girls should keep their thoughts to themselves and not say what they think in public         | 1                                                                                  | 2                | 3                   | 4                 | 88                                      |     |
|                                                                                                                            | i. Girls are expected to be humble                                                              | 1                                                                                  | 2                | 3                   | 4                 | 88                                      |     |
|                                                                                                                            | j. Girls should not make too many demands on others                                             | 1                                                                                  | 2                | 3                   | 4                 | 88                                      |     |
|                                                                                                                            | k. A girl should say what she thinks even if it hurts someone's feelings                        | 1                                                                                  | 2                | 3                   | 4                 | 88                                      |     |
|                                                                                                                            | l. Girls who argue with their friends in public do not behave as                                | 1                                                                                  | 2                | 3                   | 4                 | 88                                      |     |
|                                                                                                                            | <b>Girls are Responsible for Arousing Boys</b>                                                  |                                                                                    |                  |                     |                   |                                         |     |
|                                                                                                                            | m. Girls should cover up or they will attract unwanted sexual attention                         | 1                                                                                  | 2                | 3                   | 4                 | 88                                      |     |
|                                                                                                                            | n. Girls should be careful about the way they look so they are not seen as trying to seduce men | 1                                                                                  | 2                | 3                   | 4                 | 88                                      |     |
|                                                                                                                            | o. It's a girl's fault if boys come onto them                                                   | 1                                                                                  | 2                | 3                   | 4                 | 88                                      |     |
|                                                                                                                            | p. Girls wear short dresses to get boys' attention                                              | 1                                                                                  | 2                | 3                   | 4                 | 88                                      |     |
|                                                                                                                            | q. Girls should be free to dress as they want                                                   | 1                                                                                  | 2                | 3                   | 4                 | 88                                      |     |
| <b>SECTION 7. MARRIAGE &amp; SEXUAL BEHAVIOR</b>                                                                           |                                                                                                 |                                                                                    |                  |                     |                   |                                         |     |
| <b>QUESTIONS</b>                                                                                                           |                                                                                                 | <b>RESPONSES</b>                                                                   |                  |                     |                   |                                         |     |
| 701                                                                                                                        | Have you ever been married?                                                                     | YES<br>NO                                                                          |                  |                     |                   | 1<br>2                                  | 703 |
| 702                                                                                                                        | At what age do you expect to get married?                                                       | AGE<br>[10-50]<br>DON'T KNOW<br>DON'T EXPECT TO GET MARRIED                        |                  |                     |                   | <input type="text"/><br>88<br>98<br>ALL | 705 |
| 703                                                                                                                        | At what age did you get married?                                                                | AGE<br>[10-20]<br>DON'T KNOW                                                       |                  |                     |                   | <input type="text"/><br>88              | 703 |
| 704                                                                                                                        | Are you currently married, separated, divorced or widowed?                                      | MARRIED/LIVING WITH PARTNER<br>SEPARATED<br>DIVORCED<br>WIDOWED                    |                  |                     |                   | 1<br>2<br>3<br>4                        | 704 |
| 705                                                                                                                        | Have you ever lived with a boyfriend?                                                           | YES<br>NO                                                                          |                  |                     |                   | 1<br>2                                  | 707 |
| 706                                                                                                                        | At what age did you first start living with a boyfriend?                                        | AGE<br>[10-20]<br>DON'T KNOW                                                       |                  |                     |                   | <input type="text"/><br>88              | 706 |
| 707                                                                                                                        | How old were you when you had sexual intercourse for the very first time?                       | NEVER HAD SEXUAL INTERCOURSE<br>BELOW 7 YEARS<br>AGE IN YEARS [7-20]<br>DON'T KNOW |                  |                     |                   | 0<br>1<br><input type="text"/><br>88    | 801 |

|        |                                                                                                                                                                     |                                                                                                                                 |                   |        |
|--------|---------------------------------------------------------------------------------------------------------------------------------------------------------------------|---------------------------------------------------------------------------------------------------------------------------------|-------------------|--------|
| 708    | What was your relationship to the first person with whom you had sexual intercourse?<br><br>[DO NOT READ OPTIONS]                                                   | HUSBAND 1<br>BOYFRIEND 2<br>"SUGAR DADDY" 3<br>CASUAL ACQUAINTANCE 4<br>RELATIVE 5<br>TEACHER 6<br>STRANGER 7<br>SOMEONE ELSE 8 |                   | 708    |
| 709    | Was the person you <u>first</u> had sexual intercourse with older than you, younger than you, or about the same age as you?                                         | OLDER 1<br>YOUNGER 2<br>ABOUT THE SAME AGE 3<br>DON'T KNOW/DON'T REMEMBER 88                                                    | 711<br>711<br>711 | 709    |
| 710    | How many years older than you was this person?                                                                                                                      | NUMBER OF YEARS OLDER <input type="text"/> <input type="text"/><br>DON'T KNOW 88                                                |                   | 710    |
| 711    | The <u>first</u> time you had sexual intercourse, was a condom used?                                                                                                | YES 1<br>NO 2<br>DON'T KNOW/DON'T REMEMBER 88                                                                                   |                   | 711    |
| 712    | The first time you had sex did you want to have sex, not want to have sex, or you were unsure if you wanted to have sex?                                            | WANTED TO HAVE SEX 1<br>DID NOT WANT TO HAVE SEX 2<br>UNSURE 3                                                                  |                   | 712    |
| 713    | Now I would like to ask you some questions about your recent sexual activity. When was the <u>last</u> time you had sexual intercourse?                             | TODAY/LESS THAN A WEEK AGO 1<br>A WEEK OR MORE AGO 2<br>A MONTH OR MORE AGO 3<br>A YEAR OR MORE AGO 4                           | 716<br>716<br>716 | 713    |
| 714    | In the last week, how many times did you have sex?                                                                                                                  | TIMES HAD SEX [1-35] <input type="text"/> <input type="text"/><br>DON'T KNOW 88                                                 |                   | 714    |
| 715    | Of those times you had sex in the last week, how many times did you use a condom?<br><br>[Consistency check: Maximum = previous question]                           | TIMES USED CONDOM [1-35] <input type="text"/> <input type="text"/><br>DID NOT USE CONDOM 77<br>DON'T KNOW 88                    |                   | 715    |
| 716    | What was your relationship to the <u>last</u> person with whom you had sexual intercourse?                                                                          | HUSBAND 1<br>BOYFRIEND 2<br>"SUGAR DADDY" 3<br>CASUAL ACQUAINTANCE 4<br>RELATIVE 5<br>TEACHER 6<br>STRANGER 7<br>SOMEONE ELSE 8 |                   | 716    |
| 717    | Was the person you <u>last</u> had sexual intercourse with older than you, younger than you, or about the same age as you?                                          | OLDER 1<br>YOUNGER 2<br>ABOUT THE SAME AGE 3<br>DON'T KNOW/DON'T REMEMBER 88                                                    | 720<br>720<br>720 | 717    |
| 718    | How many years older than you was this person?                                                                                                                      | NUMBER OF YEARS OLDER <input type="text"/> <input type="text"/><br>DON'T KNOW 88                                                |                   | 718    |
| 719    | The <u>last</u> time you had sex did you want to have sex, not want to have sex, or you were unsure if you wanted to have sex?                                      | WANTED TO HAVE SEX 1<br>DID NOT WANT TO HAVE SEX 2<br>UNSURE 3                                                                  |                   | 719    |
| 720    | The <u>last</u> time you had sexual intercourse, was a condom used?                                                                                                 | YES 1<br>NO 2<br>DON'T KNOW/DON'T REMEMBER 88                                                                                   |                   | 720    |
| 721    | On average, how often did you use a condom every time you had sexual intercourse with this person in the last one year? Would you say always, sometimes or never?   | ALWAYS 1<br>SOMETIMES 2<br>NEVER 3                                                                                              |                   | 721    |
| 722    | If you were interested in obtaining family planning, do you feel it would be easy, difficult or not possible to go to a place where you can obtain family planning? | EASY 1<br>DIFFICULT 2<br>NOT POSSIBLE 3<br>DON'T KNOW 88                                                                        |                   | 722    |
| FILTER | [SKIP Q728 IF Q713 IS A YEAR OR MORE AGO]                                                                                                                           |                                                                                                                                 |                   | FILTER |
| 723    | In total, with how many different people have you had sexual                                                                                                        | NUMBER OF PARTNERS IN LAST 6 MONTHS [1-35] <input type="text"/> <input type="text"/>                                            |                   | 723    |

|                                             |                                                                                                                                                                  |                                                                                                                                                                                                                                        |                                                       |                                                      |              |     |
|---------------------------------------------|------------------------------------------------------------------------------------------------------------------------------------------------------------------|----------------------------------------------------------------------------------------------------------------------------------------------------------------------------------------------------------------------------------------|-------------------------------------------------------|------------------------------------------------------|--------------|-----|
|                                             | intercourse in the last six months?                                                                                                                              | DON'T KNOW                                                                                                                                                                                                                             | <input type="checkbox"/>                              | <input type="checkbox"/>                             | 88           |     |
| 724                                         | I will now read a list of different profiles of people and I want you to tell me if you have had sex with such a person in the past year.<br><br>[READ THE LIST] | A. A TOURIST OR FOREIGNER<br>B. AN EMPLOYER OF YOURS<br>C. A PERSON 10 OR MORE YEARS OLDER THAN YOU<br>D. A TEACHER OF YOURS<br>E. A PERSON WHO PAID YOU FOR SEX<br>F. A PERSON WHO IS MARRIED TO SOMEONE ELSE<br>G. NONE OF THE ABOVE | YES<br>1<br>1<br>1<br>1<br>1<br>1                     | NO<br>2<br>2<br>2<br>2<br>2<br>2                     |              | 724 |
|                                             | For the following questions, please think about your own experiences and tell me if you agree or disagree with the following about yourself.                     |                                                                                                                                                                                                                                        |                                                       |                                                      |              |     |
| 725                                         | You have not always been able to use condoms when you wanted to.                                                                                                 | AGREE<br>DISAGREE                                                                                                                                                                                                                      |                                                       |                                                      | 1<br>2       | 725 |
| 726                                         | You have had sex with a person in exchange for him paying rent for you.                                                                                          | AGREE<br>DISAGREE                                                                                                                                                                                                                      |                                                       |                                                      | 1<br>2       | 726 |
| 727                                         | You have had sex at times when you did not want to.                                                                                                              | AGREE<br>DISAGREE                                                                                                                                                                                                                      |                                                       |                                                      | 1<br>2       | 727 |
| 728                                         | In the past six months, have you had sex with someone because you needed or thought you would get any of the following?                                          | a. Food<br>b. Shelter/a place to stay<br>c. School fees<br>d. Sanitary pads<br>e. Money for something else<br>f. Anything else                                                                                                         | YES<br>1<br>1<br>1<br>1<br>1                          | NO<br>2<br>2<br>2<br>2<br>2                          |              | 728 |
|                                             | Money for something else, (SPECIFY) _____                                                                                                                        |                                                                                                                                                                                                                                        |                                                       |                                                      |              |     |
|                                             | Anything else, (SPECIFY) _____                                                                                                                                   |                                                                                                                                                                                                                                        |                                                       |                                                      |              |     |
| <b>SECTION 8: MENSTRUATION</b>              |                                                                                                                                                                  |                                                                                                                                                                                                                                        |                                                       |                                                      |              |     |
| <b>QUESTIONS</b>                            |                                                                                                                                                                  |                                                                                                                                                                                                                                        | <b>RESPONSES</b>                                      |                                                      |              |     |
| 801                                         | Have you ever heard of menstruation or the monthly period, which is also known as "getting visitors", 'leaking', or 'kuvudza/kuvuja'?                            | YES<br>NO                                                                                                                                                                                                                              |                                                       |                                                      | 1<br>2       | 901 |
| 802                                         | From whom or where did you <b>FIRST</b> get information on menstruation?<br><br><b>MORE THAN ONE ANSWER POSSIBLE. CIRCLE ALL THAT APPLY</b>                      | MOTHER<br>GRANDMOTHER<br>SISTER<br>AUNT<br>FRIEND<br>TEACHER<br>OTHER FAMILY MEMBER<br>NGO/CBO<br>HEALTH WORKER/CLINICIAN/DOCTOR<br>MEDIA<br>OTHER (SPECIFY _____)                                                                     | YES<br>1<br>1<br>1<br>1<br>1<br>1<br>1<br>1<br>1<br>1 | NO<br>2<br>2<br>2<br>2<br>2<br>2<br>2<br>2<br>2<br>2 |              | 802 |
|                                             | If you said other, please specify _____                                                                                                                          |                                                                                                                                                                                                                                        |                                                       |                                                      |              |     |
| 803                                         | Have you ever menstruated or gotten your monthly period?                                                                                                         | YES<br>NO                                                                                                                                                                                                                              |                                                       |                                                      | 1<br>2       | 901 |
| 804                                         | Did you know about menstruation before experiencing it <b>for the first time</b> ?                                                                               | YES<br>NO<br>NO ANSWER                                                                                                                                                                                                                 |                                                       |                                                      | 1<br>2<br>96 | 804 |
| 805                                         | At what age did you begin getting your menstrual period?                                                                                                         | AGE<br>[4-20]<br>DON'T KNOW                                                                                                                                                                                                            | <input type="checkbox"/>                              | <input type="checkbox"/>                             | 88           | 805 |
| <b>[CONSISTENCY CHECK WITH CURRENT AGE]</b> |                                                                                                                                                                  |                                                                                                                                                                                                                                        |                                                       |                                                      |              |     |
| 806                                         | When you first got your period, did you tell anyone about it?                                                                                                    | YES<br>NO                                                                                                                                                                                                                              |                                                       |                                                      | 1<br>2       | 808 |
| 807                                         | Who did you tell?                                                                                                                                                | MOTHER<br>GRANDMOTHER                                                                                                                                                                                                                  | YES<br>1<br>1                                         | NO<br>2<br>2                                         |              | 807 |

|            |                                                                                                                                              |                                                                                                                                                                                                         |                                                                                     |                                                                                     |                                                                                                                            |            |
|------------|----------------------------------------------------------------------------------------------------------------------------------------------|---------------------------------------------------------------------------------------------------------------------------------------------------------------------------------------------------------|-------------------------------------------------------------------------------------|-------------------------------------------------------------------------------------|----------------------------------------------------------------------------------------------------------------------------|------------|
|            | <b>MORE THAN ONE ANSWER POSSIBLE. CIRCLE ALL THAT APPLY</b>                                                                                  | SISTER<br>AUNT<br>FRIEND<br>TEACHER<br>HEALTH FPROFESSIONAL<br>OTHER (SPECIFY_____)                                                                                                                     | 1<br>1<br>1<br>1<br>1<br>1                                                          | 2<br>2<br>2<br>2<br>2<br>98                                                         |                                                                                                                            |            |
| <b>808</b> | What is the main method that you <b>currently</b> use to manage yourself during your period at home, and at school?                          |                                                                                                                                                                                                         | <b>AT SCHOOL</b>                                                                    | <b>AT HOME</b>                                                                      |                                                                                                                            | <b>808</b> |
|            |                                                                                                                                              | Sanitary pads (disposable)<br>Tampon<br>Tissue paper/ other paper<br>Cotton wool<br>Old pieces of cloth<br>New peieces of cloth<br>Sanitary pads (reusable)<br>Matress pieces<br>Other (SPECIFY_____)   | 1<br>2<br>3<br>4<br>5<br>6<br>7<br>8<br>98                                          | 1<br>2<br>3<br>4<br>5<br>6<br>7<br>8<br>98                                          |                                                                                                                            |            |
| <b>809</b> | Where do you usually get the materials you just mentioned?<br><br>[CHECK ALL THAT APPLY]                                                     | I BUY THEM<br>FROM MY HOME<br>GIVEN BY MOTHER<br>GIVEN BY OTHER RELATIVE<br>FROM SCHOOL<br>FROM FRIENDS<br>GIVEN BY AN NGO/CBO<br>BOYFRIEND<br>OTHER (SPECIFY_____)                                     | <b>YES</b><br>1<br>1<br>1<br>1<br>1<br>1<br>1<br>1                                  | <b>NO</b><br>2<br>2<br>2<br>2<br>2<br>2<br>2<br>2<br>98                             | <b>811</b><br><b>811</b><br><b>811</b><br><b>811</b><br><b>811</b><br><b>811</b><br><b>811</b><br><b>811</b><br><b>811</b> | <b>809</b> |
|            | If you said other, please specify                                                                                                            | _____                                                                                                                                                                                                   |                                                                                     |                                                                                     |                                                                                                                            |            |
| <b>810</b> | Where do you get the money?<br><br>[CHECK ALL THAT APPLY]                                                                                    | From parents<br>Job (specify job)<br>Own savings<br>Boyfriend<br>Other family member<br>Other (SPECIFY_____)                                                                                            | <b>YES</b><br>1<br>1<br>1<br>1<br>1<br>1                                            | <b>NO</b><br>2<br>2<br>2<br>2<br>2<br>2                                             |                                                                                                                            | <b>810</b> |
|            | If you said other, please specify                                                                                                            | _____                                                                                                                                                                                                   |                                                                                     |                                                                                     |                                                                                                                            |            |
| <b>811</b> | Apart from the main method you mentioned, what other methods do you use to manage yourself during your period?<br><br>[CHECK ALL THAT APPLY] | Sanitary pads (disposable)<br>Tampon<br>Tissue paper/ other paper<br>Cotton wool<br>Old pieces of cloth<br>New pieces of cloth<br>Sanitary towel (reusable)<br>Mattress pieces<br>Other (SPECIFY_____)  | <b>YES</b><br>1<br>1<br>1<br>1<br>1<br>1<br>1<br>1                                  | <b>NO</b><br>2<br>2<br>2<br>2<br>2<br>2<br>2<br>2<br>98                             | <b>IF NO ON ALL, SKIP 813</b>                                                                                              | <b>811</b> |
|            | If you said other, please specify                                                                                                            | _____                                                                                                                                                                                                   |                                                                                     |                                                                                     |                                                                                                                            |            |
| <b>812</b> | Of the methods you currently use, which do you prefer the most?                                                                              | Sanitary towel (disposable)<br>Tampon<br>Tissue paper/ other paper<br>Cotton wool<br>Old pieces of cloth<br>New pieces of cloth<br>Sanitary towel (reusable)<br>Mattress pieces<br>Other (SPECIFY_____) |                                                                                     | 1<br>2<br>3<br>4<br>5<br>6<br>7<br>8<br>98                                          |                                                                                                                            | <b>812</b> |
|            | I am now going to ask several more questions about how you manage your period at school, and how you manage your period at home.             |                                                                                                                                                                                                         |                                                                                     |                                                                                     |                                                                                                                            |            |
| <b>813</b> | How do you usually deal with pain or cramps during your period?<br><br>[Check all that apply]                                                |                                                                                                                                                                                                         | <b>AT SCHOOL</b>                                                                    | <b>AT HOME</b>                                                                      |                                                                                                                            | <b>813</b> |
|            |                                                                                                                                              | Does not do anything<br>Takes pain medication<br>Goes home/does not go to school<br>Goes to hospital<br>Uses alternative method. (SPECIFY_____)<br>Does not have pain/cramps                            | <b>YES</b><br>1<br>1<br>1<br>1<br>1<br>1<br><b>NO</b><br>2<br>2<br>2<br>2<br>2<br>2 | <b>YES</b><br>1<br>1<br>1<br>1<br>1<br>1<br><b>NO</b><br>2<br>2<br>2<br>2<br>2<br>2 |                                                                                                                            |            |
| <b>814</b> | Do you ever change your pad/other materials?<br><br>[If never used pads ask about other materials used]                                      | YES<br>NO<br>N/A                                                                                                                                                                                        | <b>AT SCHOOL</b><br>1<br>2<br>97                                                    | <b>AT HOME</b><br>1<br>2<br>97                                                      |                                                                                                                            | <b>814</b> |
|            |                                                                                                                                              |                                                                                                                                                                                                         | [IF NO FOR BOTH]                                                                    | <b>821</b>                                                                          |                                                                                                                            |            |
| <b>815</b> | How often are you able to change your pad/other materials in private? Would you say always, sometimes, rarely, or never?                     | Always<br>Sometimes                                                                                                                                                                                     | <b>AT SCHOOL</b><br>1<br>2                                                          | <b>AT HOME</b><br>1<br>2                                                            |                                                                                                                            | <b>815</b> |

|               |                                                                                                                        |                                                                                                                                                                                                                  |                                                             |                                                                                        |               |               |
|---------------|------------------------------------------------------------------------------------------------------------------------|------------------------------------------------------------------------------------------------------------------------------------------------------------------------------------------------------------------|-------------------------------------------------------------|----------------------------------------------------------------------------------------|---------------|---------------|
|               |                                                                                                                        | Rarely<br>Never<br>You did not need to change                                                                                                                                                                    | 3<br>4<br>8                                                 | 3<br>4<br>8                                                                            |               |               |
| 816           | Where do you usually change your pad/other material?                                                                   | <b>AT SCHOOL</b><br>Toilet<br>Classroom/room at home<br>Changed outside<br>Other (SPECIFY _____)<br>Not Applicable                                                                                               | 1<br>2<br>3<br>98<br>97                                     | <b>AT HOME</b><br>1<br>2<br>3<br>98<br>97                                              |               | 816           |
| 817           | Are you able to clean your hands after changing?                                                                       | <b>AT SCHOOL</b><br>YES<br>NO<br><b>[IF NO FOR BOTH]</b>                                                                                                                                                         | 1<br>2                                                      | <b>AT HOME</b><br>1<br>2                                                               | 819           | 817           |
| 818           | What do you use to clean your hands after changing?                                                                    | <b>AT SCHOOL</b><br><b>YES NO</b><br>Soapy water<br>Soap<br>Water<br>Wet cloth<br>Dry cloth<br>Other<br>None                                                                                                     | 1 2<br>1 2<br>1 2<br>1 2<br>1 2<br>1 2<br>1 2               | <b>AT HOME</b><br><b>YES NO</b><br>1 2<br>1 2<br>1 2<br>1 2<br>1 2<br>1 2              |               | 818           |
| 819           | How often are you able to dispose of your dirty pads/other material? Would you say always, sometimes, rarely or never? | <b>AT SCHOOL</b><br>ALWAYS<br>SOMETIMES<br>NEVER<br>RARELY<br>N/A                                                                                                                                                | 1<br>2<br>3<br>4<br>8                                       | <b>AT HOME</b><br>2<br>2<br>3<br>4<br>8                                                |               | 819           |
| 820           | Where do you dispose your dirty pads/other material?<br><b>[Check all that apply]</b>                                  | <b>AT SCHOOL</b><br><b>YES NO</b><br>INSIDE LATRINE<br>LATRINE FLOOR<br>BIN<br>DROP IN FIELD<br>BURN IN FIELD<br>TAKE TO SCHOOL/HOME<br>DROP ON WAY TO SCHOOL/HOME<br>RIVER, LAKE, POND<br>OTHER (SPECIFY _____) | 1 2<br>1 2<br>1 2<br>1 2<br>1 2<br>1 2<br>1 2<br>1 2<br>1 2 | <b>AT HOME</b><br><b>YES NO</b><br>1 2<br>1 2<br>1 2<br>1 2<br>1 2<br>1 2<br>1 2<br>98 |               | 820           |
| 821           | Did you have a monthly period every month for the past three months?                                                   | YES<br>NO                                                                                                                                                                                                        |                                                             | 1<br>2                                                                                 |               | 821           |
| 822           | What was your date of your last monthly period?                                                                        | Date of period<br><b>Note: First date when it started</b>                                                                                                                                                        |                                                             | <input type="text"/>                                                                   |               | 822           |
| 823           | How many days did your recent period last?                                                                             | Total days                                                                                                                                                                                                       |                                                             | <input type="text"/>                                                                   |               | 823           |
| 824           | Did you have pain or cramps in this recent period?                                                                     | YES<br>NO                                                                                                                                                                                                        |                                                             | 1<br>2                                                                                 |               | 824           |
| 825           | Have you ever had any blood leak onto your body or clothes when you were at school?                                    | YES<br>NO                                                                                                                                                                                                        |                                                             | 1<br>2                                                                                 | <b>FILTER</b> | 825           |
| 826           | If so, how often have you experienced this?<br><b>READ LIST</b>                                                        | ALWAYS (EVERY PERIOD)<br>SOMETIMES<br>RARELY (ONCE OR TWICE)<br>NEVER                                                                                                                                            |                                                             | 1<br>2<br>3<br>4                                                                       |               | 826           |
| 827           | What did you use at school to wash/clean off the blood ?                                                               | SOAPY WATER<br>SOAP AND WATER<br>WATER<br>WET CLOTH<br>DRY CLOTH<br>NONE<br>OTHER (SPECIFY _____)                                                                                                                |                                                             | 1<br>2<br>3<br>4<br>5<br>6<br>98                                                       |               | 827           |
| <b>FILTER</b> | <b>[IF USED PADS IN Q808 OR Q811, SKIP TO 829]</b>                                                                     |                                                                                                                                                                                                                  |                                                             |                                                                                        | 829           | <b>FILTER</b> |
| 828           | Have you ever used sanitary pads?                                                                                      | YES<br>NO                                                                                                                                                                                                        |                                                             | 1<br>2                                                                                 | 834           | 828           |
| 829           | On average, how many pads do you use per month when you have your period?                                              | Total number                                                                                                                                                                                                     |                                                             | <input type="text"/>                                                                   |               | 829           |

|     |                                                                                                                                                              |                                                                                                                                                                                                                    |                                                                       |                 |                   |
|-----|--------------------------------------------------------------------------------------------------------------------------------------------------------------|--------------------------------------------------------------------------------------------------------------------------------------------------------------------------------------------------------------------|-----------------------------------------------------------------------|-----------------|-------------------|
| 830 | If you have some remaining, do you sometimes share the pads with anyone else?                                                                                | YES<br>NO                                                                                                                                                                                                          | 1<br>2                                                                | 832             | 830               |
| 831 | If you share, who do you share with?<br><br>[Check all that apply]                                                                                           | MOTHER<br>SISTER<br>CLASSMATES<br>FRIENDS WHO ARE NOT CLASSMATES<br>OTHER RELATIVE<br>TEACHER<br>OTHER (SPECIFY _____)                                                                                             | YES<br>NO<br>1<br>2<br>1<br>2<br>1<br>2<br>1<br>2<br>1<br>2           |                 | 831               |
|     | If you said other, please specify                                                                                                                            |                                                                                                                                                                                                                    |                                                                       |                 |                   |
| 832 | Do you feel like you have enough pads to manage your period comfortably?                                                                                     | YES<br>NO                                                                                                                                                                                                          | 1<br>2                                                                |                 | 832               |
| 833 | About how frequently do you change your pads in a day/24hours?                                                                                               | Once a day<br>Twice a day (Once every 12hours)<br>Three times a day (Once every 8hours)<br>More than three times a day / Once every 7hours or less<br>None<br>Other (SPECIFY _____)                                | 1<br>2<br>3<br>4<br>5<br>98                                           |                 | 833               |
| 834 | Did you receive sanitary pads at school during this/the last school term?                                                                                    | YES<br>NO                                                                                                                                                                                                          | 1<br>2                                                                | 838             | 834               |
| 835 | If yes, were you just given the pads or did you have to ask for them?                                                                                        | Just given<br>Asked for them                                                                                                                                                                                       | 1<br>2                                                                |                 | 835               |
| 836 | The last time you received sanitary pads at school, did you receive three or more packets, two packets, one packet or less than a                            | Three or more packets<br>Two packets<br>One packet<br>Less than a packet                                                                                                                                           | 1<br>2<br>3<br>4                                                      |                 | 836               |
| 837 | How often did you receive pads at school during the last school term?                                                                                        | Once or twice per term<br>Three or more times per term                                                                                                                                                             | 1<br>2                                                                |                 | 837               |
| 838 | Tell me how much you think the following statements are true for you? For each statement below, please check whether you Agree, Disagree or you're Not Sure. |                                                                                                                                                                                                                    |                                                                       |                 | 838               |
|     |                                                                                                                                                              | <b>Agree</b>                                                                                                                                                                                                       | <b>Disagree</b>                                                       | <b>Not sure</b> | <b>Don't know</b> |
|     | a. I feel ashamed of my body when I have my period                                                                                                           | 1                                                                                                                                                                                                                  | 2                                                                     | 3               | 88                |
|     | b. I'm uncomfortable in my body when I have my period                                                                                                        | 1                                                                                                                                                                                                                  | 2                                                                     | 3               | 88                |
|     | c. It's important that I keep my period secret from anyone                                                                                                   | 1                                                                                                                                                                                                                  | 2                                                                     | 3               | 88                |
|     | d. I feel proud that I have my periods                                                                                                                       | 1                                                                                                                                                                                                                  | 2                                                                     | 3               | 88                |
|     | e. I wish I could never have periods                                                                                                                         | 1                                                                                                                                                                                                                  | 2                                                                     | 3               | 88                |
|     | f. A girl can engage in sports activities during her periods                                                                                                 | 1                                                                                                                                                                                                                  | 2                                                                     | 3               | 88                |
|     | g. It is easy to concentrate in class while on my periods                                                                                                    | 1                                                                                                                                                                                                                  | 2                                                                     | 3               | 88                |
|     | h. Periods are an illness                                                                                                                                    | 1                                                                                                                                                                                                                  | 2                                                                     | 3               | 88                |
|     | i. A girl is unclean when she is on her period                                                                                                               | 1                                                                                                                                                                                                                  | 2                                                                     | 3               | 88                |
|     | j. Boys can tell when girls are having their periods                                                                                                         | 1                                                                                                                                                                                                                  | 2                                                                     | 3               | 88                |
|     | k. Menstruation is a normal process for girls                                                                                                                | 1                                                                                                                                                                                                                  | 2                                                                     | 3               | 88                |
|     | l. One should not bathe during menstruation                                                                                                                  | 1                                                                                                                                                                                                                  | 2                                                                     | 3               | 88                |
|     | m. All girls who have ever had a period are at risk of becoming pregnant if they have sex                                                                    | 1                                                                                                                                                                                                                  | 2                                                                     | 3               | 88                |
|     | n. A girl should not feel embarrassed if she stains her dress at school when on her periods                                                                  | 1                                                                                                                                                                                                                  | 2                                                                     | 3               | 88                |
| 839 | Are there any activities that you are forbidden by anyone to engage in during your periods?                                                                  | Yes<br>No                                                                                                                                                                                                          | 1<br>2                                                                | 841             | 839               |
| 840 | If yes, what activities?<br><br>[CHECK ALL THAT APPLY]                                                                                                       | Going to school<br>Going to church/mosque<br>Going to market<br>Cooking for the family<br>Interacting with other family members<br>Interacting with neighbors<br>Interacting with men/boys<br>Playing games/sports | YES<br>NO<br>1<br>2<br>1<br>2<br>1<br>2<br>1<br>2<br>1<br>2<br>1<br>2 |                 | 840               |

|                                                                   |                                                                                                                                                                                          |                                                                                                                                                                                                                                                        |                                                       |                                                       |            |     |
|-------------------------------------------------------------------|------------------------------------------------------------------------------------------------------------------------------------------------------------------------------------------|--------------------------------------------------------------------------------------------------------------------------------------------------------------------------------------------------------------------------------------------------------|-------------------------------------------------------|-------------------------------------------------------|------------|-----|
|                                                                   |                                                                                                                                                                                          | Fasting<br>Other (SPECIFY _____)                                                                                                                                                                                                                       | 1<br>1                                                | 2<br>2                                                |            |     |
|                                                                   | If you said other, please specify                                                                                                                                                        |                                                                                                                                                                                                                                                        |                                                       |                                                       |            |     |
| 841                                                               | Are there any activities that you <b>choose</b> not to engage in during your periods?                                                                                                    | YES<br>NO                                                                                                                                                                                                                                              |                                                       | 1<br>2                                                | 843        | 841 |
| 842                                                               | If yes, what activities?<br><br>[CHECK ALL THAT APPLY]                                                                                                                                   | Going to school<br>Going to church/mosque<br>Going to market<br>Cooking for the family<br>Interacting with other family members<br>Interacting with neighbors<br>Interacting with men/boys<br>Playing games/sports<br>Fasting<br>Other (SPECIFY _____) | YES<br>1<br>1<br>1<br>1<br>1<br>1<br>1<br>1<br>1      | NO<br>2<br>2<br>2<br>2<br>2<br>2<br>2<br>2<br>2<br>98 |            | 842 |
|                                                                   | If you said other, please specify                                                                                                                                                        | If you said other, please specify                                                                                                                                                                                                                      |                                                       |                                                       |            |     |
| 843                                                               | Within the past year, has anyone teased you about your period?                                                                                                                           | Yes<br>No                                                                                                                                                                                                                                              |                                                       |                                                       | 901        | 843 |
| 844                                                               | Who has teased you about your period?<br><br>[CHECK ALL THAT APPLY]                                                                                                                      | Brother<br>Sister<br>Other male relative<br>Other female relative<br>Male school mate<br>Female school mate<br>Other male friend<br>Other female friend<br>Teacher<br>Other (SPECIFY _____)                                                            | YES<br>1<br>1<br>1<br>1<br>1<br>1<br>1<br>1<br>1<br>1 | NO<br>2<br>2<br>2<br>2<br>2<br>2<br>2<br>2<br>2<br>2  |            | 844 |
|                                                                   | If you said other, please specify                                                                                                                                                        |                                                                                                                                                                                                                                                        |                                                       |                                                       |            |     |
| <b>SECTION 9: REPRODUCTIVE HEALTH KNOWLEDGE AND CONTRACEPTION</b> |                                                                                                                                                                                          |                                                                                                                                                                                                                                                        |                                                       |                                                       |            |     |
| 901                                                               | <b>Please tell me if the following statements are true or false?</b><br>Can pregnancy occur after kissing or hugging?                                                                    | TRUE<br>FALSE<br>DON'T KNOW<br>NO RESPONSE                                                                                                                                                                                                             |                                                       | 1<br>2<br>88<br>96                                    |            | 901 |
| 902                                                               | Is it possible for a woman get pregnant on the very <b>first time</b> she has sexual intercourse?                                                                                        | TRUE<br>FALSE<br>DON'T KNOW<br>NO RESPONSE                                                                                                                                                                                                             |                                                       | 1<br>2<br>88<br>96                                    |            | 902 |
| 903                                                               | Girls undergo pubertal changes. Can you please tell me, what are the physical changes that a girl experiences in transition from childhood to adolescence?<br><br>[CHECK ALL THAT APPLY] | Hair grows in different parts of body<br>Breasts develop<br>Acne appears<br>Menstruation starts<br>Rapid physical development<br>Voice Changes<br><br>Don't know                                                                                       | YES<br>1<br>1<br>1<br>1<br>1<br>1                     | NO<br>2<br>2<br>2<br>2<br>2<br>2<br><br>88            |            | 903 |
| 904                                                               | From one menstrual period to the next, are there certain days when a woman is more likely to become pregnant if she has sexual intercourse?                                              | YES<br>NO<br>DON'T KNOW                                                                                                                                                                                                                                |                                                       | 1<br>2<br>88                                          | 906<br>906 | 904 |
| 905                                                               | Is this time just before her period begins, during her period, right after her period has ended, or two weeks after her period?                                                          | JUST BEFORE HER PERIOD BEGINS<br>DURING HER PERIOD<br>RIGHT AFTER HER PERIOD ENDS<br>HALFWAY BETWEEN TWO PERIODS<br>OTHER(SPECIFY _____)                                                                                                               |                                                       | 1<br>2<br>3<br>4<br>98                                |            | 905 |
| 906                                                               | <b>Please tell me if the following statements are true or false?</b><br>Menstruation typically occurs once a month?                                                                      | TRUE<br>FALSE<br>DON'T KNOW                                                                                                                                                                                                                            |                                                       | 1<br>2<br>88                                          |            | 906 |
| 907                                                               | It is healthy to have some variation in vaginal discharge throughout your menstrual cycle                                                                                                | TRUE<br>FALSE<br>DON'T KNOW                                                                                                                                                                                                                            |                                                       | 1<br>2<br>88                                          |            | 907 |

|                                                                                                               |                                                                                                                                                                                                                                                                                                                     |                                                                                                                                                                                                                                                                                                                                                                                                                                                                                                                                                                                                                                                                                                                                                                                                                                                                                                                                                                                                                                                                                                                                             |                            |                                                                                |          |                        |                                                                              |   |                           |    |                                                            |                                            |   |    |                                                                         |   |   |                                     |                                             |   |                              |    |                                                                 |                        |   |    |                                                               |   |    |    |                                                                               |     |   |    |                                                                                                               |   |   |    |  |  |
|---------------------------------------------------------------------------------------------------------------|---------------------------------------------------------------------------------------------------------------------------------------------------------------------------------------------------------------------------------------------------------------------------------------------------------------------|---------------------------------------------------------------------------------------------------------------------------------------------------------------------------------------------------------------------------------------------------------------------------------------------------------------------------------------------------------------------------------------------------------------------------------------------------------------------------------------------------------------------------------------------------------------------------------------------------------------------------------------------------------------------------------------------------------------------------------------------------------------------------------------------------------------------------------------------------------------------------------------------------------------------------------------------------------------------------------------------------------------------------------------------------------------------------------------------------------------------------------------------|----------------------------|--------------------------------------------------------------------------------|----------|------------------------|------------------------------------------------------------------------------|---|---------------------------|----|------------------------------------------------------------|--------------------------------------------|---|----|-------------------------------------------------------------------------|---|---|-------------------------------------|---------------------------------------------|---|------------------------------|----|-----------------------------------------------------------------|------------------------|---|----|---------------------------------------------------------------|---|----|----|-------------------------------------------------------------------------------|-----|---|----|---------------------------------------------------------------------------------------------------------------|---|---|----|--|--|
| 908                                                                                                           | Women and girls can get vaginal infections even if they have never had sex                                                                                                                                                                                                                                          | TRUE<br>FALSE<br>DON'T KNOW                                                                                                                                                                                                                                                                                                                                                                                                                                                                                                                                                                                                                                                                                                                                                                                                                                                                                                                                                                                                                                                                                                                 | 1<br>2<br>88               |                                                                                | 908      |                        |                                                                              |   |                           |    |                                                            |                                            |   |    |                                                                         |   |   |                                     |                                             |   |                              |    |                                                                 |                        |   |    |                                                               |   |    |    |                                                                               |     |   |    |                                                                                                               |   |   |    |  |  |
| 909                                                                                                           | Women and girls can prevent vaginal infections by wiping their private area from the front to the back.                                                                                                                                                                                                             | TRUE<br>FALSE<br>DON'T KNOW                                                                                                                                                                                                                                                                                                                                                                                                                                                                                                                                                                                                                                                                                                                                                                                                                                                                                                                                                                                                                                                                                                                 | 1<br>2<br>88               |                                                                                | 909      |                        |                                                                              |   |                           |    |                                                            |                                            |   |    |                                                                         |   |   |                                     |                                             |   |                              |    |                                                                 |                        |   |    |                                                               |   |    |    |                                                                               |     |   |    |                                                                                                               |   |   |    |  |  |
| 910                                                                                                           | If a girl gets pregnant in her teenage years, what are the potential issues she might have to face?<br><br>[CHECK ALL THAT APPLY]                                                                                                                                                                                   | <table border="0"> <tr> <td></td> <td>YES</td> <td>NO</td> </tr> <tr> <td>No problem</td> <td>1</td> <td>2</td> </tr> <tr> <td>Health risk to mother</td> <td>1</td> <td>2</td> </tr> <tr> <td>Health risk to baby</td> <td>1</td> <td>2</td> </tr> <tr> <td>Education might get stopped</td> <td>1</td> <td>2</td> </tr> <tr> <td>May not be able to continue working</td> <td>1</td> <td>2</td> </tr> <tr> <td>May be forced to get married</td> <td>1</td> <td>2</td> </tr> <tr> <td>Others (SPECIFY _____)</td> <td>1</td> <td>2</td> </tr> <tr> <td>Don't know</td> <td>1</td> <td>2</td> </tr> </table>                                                                                                                                                                                                                                                                                                                                                                                                                                                                                                                               |                            | YES                                                                            | NO       | No problem             | 1                                                                            | 2 | Health risk to mother     | 1  | 2                                                          | Health risk to baby                        | 1 | 2  | Education might get stopped                                             | 1 | 2 | May not be able to continue working | 1                                           | 2 | May be forced to get married | 1  | 2                                                               | Others (SPECIFY _____) | 1 | 2  | Don't know                                                    | 1 | 2  |    |                                                                               | 910 |   |    |                                                                                                               |   |   |    |  |  |
|                                                                                                               | YES                                                                                                                                                                                                                                                                                                                 | NO                                                                                                                                                                                                                                                                                                                                                                                                                                                                                                                                                                                                                                                                                                                                                                                                                                                                                                                                                                                                                                                                                                                                          |                            |                                                                                |          |                        |                                                                              |   |                           |    |                                                            |                                            |   |    |                                                                         |   |   |                                     |                                             |   |                              |    |                                                                 |                        |   |    |                                                               |   |    |    |                                                                               |     |   |    |                                                                                                               |   |   |    |  |  |
| No problem                                                                                                    | 1                                                                                                                                                                                                                                                                                                                   | 2                                                                                                                                                                                                                                                                                                                                                                                                                                                                                                                                                                                                                                                                                                                                                                                                                                                                                                                                                                                                                                                                                                                                           |                            |                                                                                |          |                        |                                                                              |   |                           |    |                                                            |                                            |   |    |                                                                         |   |   |                                     |                                             |   |                              |    |                                                                 |                        |   |    |                                                               |   |    |    |                                                                               |     |   |    |                                                                                                               |   |   |    |  |  |
| Health risk to mother                                                                                         | 1                                                                                                                                                                                                                                                                                                                   | 2                                                                                                                                                                                                                                                                                                                                                                                                                                                                                                                                                                                                                                                                                                                                                                                                                                                                                                                                                                                                                                                                                                                                           |                            |                                                                                |          |                        |                                                                              |   |                           |    |                                                            |                                            |   |    |                                                                         |   |   |                                     |                                             |   |                              |    |                                                                 |                        |   |    |                                                               |   |    |    |                                                                               |     |   |    |                                                                                                               |   |   |    |  |  |
| Health risk to baby                                                                                           | 1                                                                                                                                                                                                                                                                                                                   | 2                                                                                                                                                                                                                                                                                                                                                                                                                                                                                                                                                                                                                                                                                                                                                                                                                                                                                                                                                                                                                                                                                                                                           |                            |                                                                                |          |                        |                                                                              |   |                           |    |                                                            |                                            |   |    |                                                                         |   |   |                                     |                                             |   |                              |    |                                                                 |                        |   |    |                                                               |   |    |    |                                                                               |     |   |    |                                                                                                               |   |   |    |  |  |
| Education might get stopped                                                                                   | 1                                                                                                                                                                                                                                                                                                                   | 2                                                                                                                                                                                                                                                                                                                                                                                                                                                                                                                                                                                                                                                                                                                                                                                                                                                                                                                                                                                                                                                                                                                                           |                            |                                                                                |          |                        |                                                                              |   |                           |    |                                                            |                                            |   |    |                                                                         |   |   |                                     |                                             |   |                              |    |                                                                 |                        |   |    |                                                               |   |    |    |                                                                               |     |   |    |                                                                                                               |   |   |    |  |  |
| May not be able to continue working                                                                           | 1                                                                                                                                                                                                                                                                                                                   | 2                                                                                                                                                                                                                                                                                                                                                                                                                                                                                                                                                                                                                                                                                                                                                                                                                                                                                                                                                                                                                                                                                                                                           |                            |                                                                                |          |                        |                                                                              |   |                           |    |                                                            |                                            |   |    |                                                                         |   |   |                                     |                                             |   |                              |    |                                                                 |                        |   |    |                                                               |   |    |    |                                                                               |     |   |    |                                                                                                               |   |   |    |  |  |
| May be forced to get married                                                                                  | 1                                                                                                                                                                                                                                                                                                                   | 2                                                                                                                                                                                                                                                                                                                                                                                                                                                                                                                                                                                                                                                                                                                                                                                                                                                                                                                                                                                                                                                                                                                                           |                            |                                                                                |          |                        |                                                                              |   |                           |    |                                                            |                                            |   |    |                                                                         |   |   |                                     |                                             |   |                              |    |                                                                 |                        |   |    |                                                               |   |    |    |                                                                               |     |   |    |                                                                                                               |   |   |    |  |  |
| Others (SPECIFY _____)                                                                                        | 1                                                                                                                                                                                                                                                                                                                   | 2                                                                                                                                                                                                                                                                                                                                                                                                                                                                                                                                                                                                                                                                                                                                                                                                                                                                                                                                                                                                                                                                                                                                           |                            |                                                                                |          |                        |                                                                              |   |                           |    |                                                            |                                            |   |    |                                                                         |   |   |                                     |                                             |   |                              |    |                                                                 |                        |   |    |                                                               |   |    |    |                                                                               |     |   |    |                                                                                                               |   |   |    |  |  |
| Don't know                                                                                                    | 1                                                                                                                                                                                                                                                                                                                   | 2                                                                                                                                                                                                                                                                                                                                                                                                                                                                                                                                                                                                                                                                                                                                                                                                                                                                                                                                                                                                                                                                                                                                           |                            |                                                                                |          |                        |                                                                              |   |                           |    |                                                            |                                            |   |    |                                                                         |   |   |                                     |                                             |   |                              |    |                                                                 |                        |   |    |                                                               |   |    |    |                                                                               |     |   |    |                                                                                                               |   |   |    |  |  |
|                                                                                                               | If you said other, please specify                                                                                                                                                                                                                                                                                   |                                                                                                                                                                                                                                                                                                                                                                                                                                                                                                                                                                                                                                                                                                                                                                                                                                                                                                                                                                                                                                                                                                                                             |                            |                                                                                |          |                        |                                                                              |   |                           |    |                                                            |                                            |   |    |                                                                         |   |   |                                     |                                             |   |                              |    |                                                                 |                        |   |    |                                                               |   |    |    |                                                                               |     |   |    |                                                                                                               |   |   |    |  |  |
| 911                                                                                                           | What is the legal age for a girl to get married in Kenya?                                                                                                                                                                                                                                                           | At age<br>Don't Know                                                                                                                                                                                                                                                                                                                                                                                                                                                                                                                                                                                                                                                                                                                                                                                                                                                                                                                                                                                                                                                                                                                        | <input type="text"/><br>88 |                                                                                | 911      |                        |                                                                              |   |                           |    |                                                            |                                            |   |    |                                                                         |   |   |                                     |                                             |   |                              |    |                                                                 |                        |   |    |                                                               |   |    |    |                                                                               |     |   |    |                                                                                                               |   |   |    |  |  |
| 912                                                                                                           | What are the disadvantages of marrying at an early age (before age 18) for girls?<br><br>[CHECK ALL THAT APPLY]                                                                                                                                                                                                     | <table border="0"> <tr> <td></td> <td>YES</td> <td>NO</td> </tr> <tr> <td>Risk to child at birth</td> <td>1</td> <td>2</td> </tr> <tr> <td>Risk to Mother at deliver</td> <td>1</td> <td>2</td> </tr> <tr> <td>Immature and incapable of raising children</td> <td>1</td> <td>2</td> </tr> <tr> <td>Immature and incapable of running household</td> <td>1</td> <td>2</td> </tr> <tr> <td>Unable to complete education</td> <td>1</td> <td>2</td> </tr> <tr> <td>Ill health/Depression</td> <td>1</td> <td>2</td> </tr> <tr> <td>Other</td> <td>1</td> <td>2</td> </tr> <tr> <td>Don't know</td> <td></td> <td>88</td> </tr> </table>                                                                                                                                                                                                                                                                                                                                                                                                                                                                                                       |                            | YES                                                                            | NO       | Risk to child at birth | 1                                                                            | 2 | Risk to Mother at deliver | 1  | 2                                                          | Immature and incapable of raising children | 1 | 2  | Immature and incapable of running household                             | 1 | 2 | Unable to complete education        | 1                                           | 2 | Ill health/Depression        | 1  | 2                                                               | Other                  | 1 | 2  | Don't know                                                    |   | 88 |    |                                                                               | 912 |   |    |                                                                                                               |   |   |    |  |  |
|                                                                                                               | YES                                                                                                                                                                                                                                                                                                                 | NO                                                                                                                                                                                                                                                                                                                                                                                                                                                                                                                                                                                                                                                                                                                                                                                                                                                                                                                                                                                                                                                                                                                                          |                            |                                                                                |          |                        |                                                                              |   |                           |    |                                                            |                                            |   |    |                                                                         |   |   |                                     |                                             |   |                              |    |                                                                 |                        |   |    |                                                               |   |    |    |                                                                               |     |   |    |                                                                                                               |   |   |    |  |  |
| Risk to child at birth                                                                                        | 1                                                                                                                                                                                                                                                                                                                   | 2                                                                                                                                                                                                                                                                                                                                                                                                                                                                                                                                                                                                                                                                                                                                                                                                                                                                                                                                                                                                                                                                                                                                           |                            |                                                                                |          |                        |                                                                              |   |                           |    |                                                            |                                            |   |    |                                                                         |   |   |                                     |                                             |   |                              |    |                                                                 |                        |   |    |                                                               |   |    |    |                                                                               |     |   |    |                                                                                                               |   |   |    |  |  |
| Risk to Mother at deliver                                                                                     | 1                                                                                                                                                                                                                                                                                                                   | 2                                                                                                                                                                                                                                                                                                                                                                                                                                                                                                                                                                                                                                                                                                                                                                                                                                                                                                                                                                                                                                                                                                                                           |                            |                                                                                |          |                        |                                                                              |   |                           |    |                                                            |                                            |   |    |                                                                         |   |   |                                     |                                             |   |                              |    |                                                                 |                        |   |    |                                                               |   |    |    |                                                                               |     |   |    |                                                                                                               |   |   |    |  |  |
| Immature and incapable of raising children                                                                    | 1                                                                                                                                                                                                                                                                                                                   | 2                                                                                                                                                                                                                                                                                                                                                                                                                                                                                                                                                                                                                                                                                                                                                                                                                                                                                                                                                                                                                                                                                                                                           |                            |                                                                                |          |                        |                                                                              |   |                           |    |                                                            |                                            |   |    |                                                                         |   |   |                                     |                                             |   |                              |    |                                                                 |                        |   |    |                                                               |   |    |    |                                                                               |     |   |    |                                                                                                               |   |   |    |  |  |
| Immature and incapable of running household                                                                   | 1                                                                                                                                                                                                                                                                                                                   | 2                                                                                                                                                                                                                                                                                                                                                                                                                                                                                                                                                                                                                                                                                                                                                                                                                                                                                                                                                                                                                                                                                                                                           |                            |                                                                                |          |                        |                                                                              |   |                           |    |                                                            |                                            |   |    |                                                                         |   |   |                                     |                                             |   |                              |    |                                                                 |                        |   |    |                                                               |   |    |    |                                                                               |     |   |    |                                                                                                               |   |   |    |  |  |
| Unable to complete education                                                                                  | 1                                                                                                                                                                                                                                                                                                                   | 2                                                                                                                                                                                                                                                                                                                                                                                                                                                                                                                                                                                                                                                                                                                                                                                                                                                                                                                                                                                                                                                                                                                                           |                            |                                                                                |          |                        |                                                                              |   |                           |    |                                                            |                                            |   |    |                                                                         |   |   |                                     |                                             |   |                              |    |                                                                 |                        |   |    |                                                               |   |    |    |                                                                               |     |   |    |                                                                                                               |   |   |    |  |  |
| Ill health/Depression                                                                                         | 1                                                                                                                                                                                                                                                                                                                   | 2                                                                                                                                                                                                                                                                                                                                                                                                                                                                                                                                                                                                                                                                                                                                                                                                                                                                                                                                                                                                                                                                                                                                           |                            |                                                                                |          |                        |                                                                              |   |                           |    |                                                            |                                            |   |    |                                                                         |   |   |                                     |                                             |   |                              |    |                                                                 |                        |   |    |                                                               |   |    |    |                                                                               |     |   |    |                                                                                                               |   |   |    |  |  |
| Other                                                                                                         | 1                                                                                                                                                                                                                                                                                                                   | 2                                                                                                                                                                                                                                                                                                                                                                                                                                                                                                                                                                                                                                                                                                                                                                                                                                                                                                                                                                                                                                                                                                                                           |                            |                                                                                |          |                        |                                                                              |   |                           |    |                                                            |                                            |   |    |                                                                         |   |   |                                     |                                             |   |                              |    |                                                                 |                        |   |    |                                                               |   |    |    |                                                                               |     |   |    |                                                                                                               |   |   |    |  |  |
| Don't know                                                                                                    |                                                                                                                                                                                                                                                                                                                     | 88                                                                                                                                                                                                                                                                                                                                                                                                                                                                                                                                                                                                                                                                                                                                                                                                                                                                                                                                                                                                                                                                                                                                          |                            |                                                                                |          |                        |                                                                              |   |                           |    |                                                            |                                            |   |    |                                                                         |   |   |                                     |                                             |   |                              |    |                                                                 |                        |   |    |                                                               |   |    |    |                                                                               |     |   |    |                                                                                                               |   |   |    |  |  |
|                                                                                                               | If you said other, please specify _____                                                                                                                                                                                                                                                                             |                                                                                                                                                                                                                                                                                                                                                                                                                                                                                                                                                                                                                                                                                                                                                                                                                                                                                                                                                                                                                                                                                                                                             |                            |                                                                                |          |                        |                                                                              |   |                           |    |                                                            |                                            |   |    |                                                                         |   |   |                                     |                                             |   |                              |    |                                                                 |                        |   |    |                                                               |   |    |    |                                                                               |     |   |    |                                                                                                               |   |   |    |  |  |
| 913                                                                                                           | Now, I am going to read you some statements, please tell me if you agree or disagree with them.                                                                                                                                                                                                                     |                                                                                                                                                                                                                                                                                                                                                                                                                                                                                                                                                                                                                                                                                                                                                                                                                                                                                                                                                                                                                                                                                                                                             |                            |                                                                                | 913      |                        |                                                                              |   |                           |    |                                                            |                                            |   |    |                                                                         |   |   |                                     |                                             |   |                              |    |                                                                 |                        |   |    |                                                               |   |    |    |                                                                               |     |   |    |                                                                                                               |   |   |    |  |  |
|                                                                                                               |                                                                                                                                                                                                                                                                                                                     | <table border="0"> <tr> <td></td> <td>AGREE</td> <td>DISAGREE</td> <td>DON'T KNOW</td> </tr> <tr> <td>a. A girl has the right to seek and receive information related to sexuality</td> <td>1</td> <td>2</td> <td>88</td> </tr> <tr> <td>b. A girl/woman has the right to choose who she will marry</td> <td>1</td> <td>2</td> <td>88</td> </tr> <tr> <td>c. A girl/woman has the right to decide whether or not to have children</td> <td>1</td> <td>2</td> <td>88</td> </tr> <tr> <td>d. A girl has a right to refuse to have sex</td> <td>1</td> <td>2</td> <td>88</td> </tr> <tr> <td>e. A girl has a right to refuse to enter into a forced marriage</td> <td>1</td> <td>2</td> <td>88</td> </tr> <tr> <td>f. A girl/woman has the right to decide when to have children</td> <td>1</td> <td>2</td> <td>88</td> </tr> <tr> <td>g. A girl my age has a right to know about family planning and contraceptives</td> <td>1</td> <td>2</td> <td>88</td> </tr> <tr> <td>h. A girl/woman has the right to insist on the use of contraceptives/family planning with her husband/partner</td> <td>1</td> <td>2</td> <td>88</td> </tr> </table> |                            | AGREE                                                                          | DISAGREE | DON'T KNOW             | a. A girl has the right to seek and receive information related to sexuality | 1 | 2                         | 88 | b. A girl/woman has the right to choose who she will marry | 1                                          | 2 | 88 | c. A girl/woman has the right to decide whether or not to have children | 1 | 2 | 88                                  | d. A girl has a right to refuse to have sex | 1 | 2                            | 88 | e. A girl has a right to refuse to enter into a forced marriage | 1                      | 2 | 88 | f. A girl/woman has the right to decide when to have children | 1 | 2  | 88 | g. A girl my age has a right to know about family planning and contraceptives | 1   | 2 | 88 | h. A girl/woman has the right to insist on the use of contraceptives/family planning with her husband/partner | 1 | 2 | 88 |  |  |
|                                                                                                               | AGREE                                                                                                                                                                                                                                                                                                               | DISAGREE                                                                                                                                                                                                                                                                                                                                                                                                                                                                                                                                                                                                                                                                                                                                                                                                                                                                                                                                                                                                                                                                                                                                    | DON'T KNOW                 |                                                                                |          |                        |                                                                              |   |                           |    |                                                            |                                            |   |    |                                                                         |   |   |                                     |                                             |   |                              |    |                                                                 |                        |   |    |                                                               |   |    |    |                                                                               |     |   |    |                                                                                                               |   |   |    |  |  |
| a. A girl has the right to seek and receive information related to sexuality                                  | 1                                                                                                                                                                                                                                                                                                                   | 2                                                                                                                                                                                                                                                                                                                                                                                                                                                                                                                                                                                                                                                                                                                                                                                                                                                                                                                                                                                                                                                                                                                                           | 88                         |                                                                                |          |                        |                                                                              |   |                           |    |                                                            |                                            |   |    |                                                                         |   |   |                                     |                                             |   |                              |    |                                                                 |                        |   |    |                                                               |   |    |    |                                                                               |     |   |    |                                                                                                               |   |   |    |  |  |
| b. A girl/woman has the right to choose who she will marry                                                    | 1                                                                                                                                                                                                                                                                                                                   | 2                                                                                                                                                                                                                                                                                                                                                                                                                                                                                                                                                                                                                                                                                                                                                                                                                                                                                                                                                                                                                                                                                                                                           | 88                         |                                                                                |          |                        |                                                                              |   |                           |    |                                                            |                                            |   |    |                                                                         |   |   |                                     |                                             |   |                              |    |                                                                 |                        |   |    |                                                               |   |    |    |                                                                               |     |   |    |                                                                                                               |   |   |    |  |  |
| c. A girl/woman has the right to decide whether or not to have children                                       | 1                                                                                                                                                                                                                                                                                                                   | 2                                                                                                                                                                                                                                                                                                                                                                                                                                                                                                                                                                                                                                                                                                                                                                                                                                                                                                                                                                                                                                                                                                                                           | 88                         |                                                                                |          |                        |                                                                              |   |                           |    |                                                            |                                            |   |    |                                                                         |   |   |                                     |                                             |   |                              |    |                                                                 |                        |   |    |                                                               |   |    |    |                                                                               |     |   |    |                                                                                                               |   |   |    |  |  |
| d. A girl has a right to refuse to have sex                                                                   | 1                                                                                                                                                                                                                                                                                                                   | 2                                                                                                                                                                                                                                                                                                                                                                                                                                                                                                                                                                                                                                                                                                                                                                                                                                                                                                                                                                                                                                                                                                                                           | 88                         |                                                                                |          |                        |                                                                              |   |                           |    |                                                            |                                            |   |    |                                                                         |   |   |                                     |                                             |   |                              |    |                                                                 |                        |   |    |                                                               |   |    |    |                                                                               |     |   |    |                                                                                                               |   |   |    |  |  |
| e. A girl has a right to refuse to enter into a forced marriage                                               | 1                                                                                                                                                                                                                                                                                                                   | 2                                                                                                                                                                                                                                                                                                                                                                                                                                                                                                                                                                                                                                                                                                                                                                                                                                                                                                                                                                                                                                                                                                                                           | 88                         |                                                                                |          |                        |                                                                              |   |                           |    |                                                            |                                            |   |    |                                                                         |   |   |                                     |                                             |   |                              |    |                                                                 |                        |   |    |                                                               |   |    |    |                                                                               |     |   |    |                                                                                                               |   |   |    |  |  |
| f. A girl/woman has the right to decide when to have children                                                 | 1                                                                                                                                                                                                                                                                                                                   | 2                                                                                                                                                                                                                                                                                                                                                                                                                                                                                                                                                                                                                                                                                                                                                                                                                                                                                                                                                                                                                                                                                                                                           | 88                         |                                                                                |          |                        |                                                                              |   |                           |    |                                                            |                                            |   |    |                                                                         |   |   |                                     |                                             |   |                              |    |                                                                 |                        |   |    |                                                               |   |    |    |                                                                               |     |   |    |                                                                                                               |   |   |    |  |  |
| g. A girl my age has a right to know about family planning and contraceptives                                 | 1                                                                                                                                                                                                                                                                                                                   | 2                                                                                                                                                                                                                                                                                                                                                                                                                                                                                                                                                                                                                                                                                                                                                                                                                                                                                                                                                                                                                                                                                                                                           | 88                         |                                                                                |          |                        |                                                                              |   |                           |    |                                                            |                                            |   |    |                                                                         |   |   |                                     |                                             |   |                              |    |                                                                 |                        |   |    |                                                               |   |    |    |                                                                               |     |   |    |                                                                                                               |   |   |    |  |  |
| h. A girl/woman has the right to insist on the use of contraceptives/family planning with her husband/partner | 1                                                                                                                                                                                                                                                                                                                   | 2                                                                                                                                                                                                                                                                                                                                                                                                                                                                                                                                                                                                                                                                                                                                                                                                                                                                                                                                                                                                                                                                                                                                           | 88                         |                                                                                |          |                        |                                                                              |   |                           |    |                                                            |                                            |   |    |                                                                         |   |   |                                     |                                             |   |                              |    |                                                                 |                        |   |    |                                                               |   |    |    |                                                                               |     |   |    |                                                                                                               |   |   |    |  |  |
| 914                                                                                                           | Now I would like to talk about family planning – the various ways or methods that a couple can use to delay or avoid a pregnancy.<br><br>Which ways or methods have you heard about?<br><b>[FOR METHODS NOT MENTIONED SPONTANEOUSLY, ASK: Have you heard of (METHOD)?]</b><br><br>If NO to 914 (a - i), skip to 915 |                                                                                                                                                                                                                                                                                                                                                                                                                                                                                                                                                                                                                                                                                                                                                                                                                                                                                                                                                                                                                                                                                                                                             |                            | <p style="text-align: center;"><b>915</b><br/>Have you ever used [METHOD]?</p> | 914      |                        |                                                                              |   |                           |    |                                                            |                                            |   |    |                                                                         |   |   |                                     |                                             |   |                              |    |                                                                 |                        |   |    |                                                               |   |    |    |                                                                               |     |   |    |                                                                                                               |   |   |    |  |  |
|                                                                                                               | a. PILL: Women can take a pill every day to avoid becoming pregnant.                                                                                                                                                                                                                                                | YES, SPONT<br>YES, RECOG<br>NO                                                                                                                                                                                                                                                                                                                                                                                                                                                                                                                                                                                                                                                                                                                                                                                                                                                                                                                                                                                                                                                                                                              | 1<br>2<br>3                | YES<br>NO                                                                      | 1<br>2   |                        |                                                                              |   |                           |    |                                                            |                                            |   |    |                                                                         |   |   |                                     |                                             |   |                              |    |                                                                 |                        |   |    |                                                               |   |    |    |                                                                               |     |   |    |                                                                                                               |   |   |    |  |  |
|                                                                                                               | b. IUD: Women can have a loop or coil placed inside them by a doctor or a nurse.                                                                                                                                                                                                                                    | YES, SPONT<br>YES, RECOG<br>NO                                                                                                                                                                                                                                                                                                                                                                                                                                                                                                                                                                                                                                                                                                                                                                                                                                                                                                                                                                                                                                                                                                              | 1<br>2<br>3                | YES<br>NO                                                                      | 1<br>2   |                        |                                                                              |   |                           |    |                                                            |                                            |   |    |                                                                         |   |   |                                     |                                             |   |                              |    |                                                                 |                        |   |    |                                                               |   |    |    |                                                                               |     |   |    |                                                                                                               |   |   |    |  |  |
|                                                                                                               | c. INJECTABLES: Women can have an injection by a health provider that stops them from becoming pregnant for one or more months.                                                                                                                                                                                     | YES, SPONT<br>YES, RECOG<br>NO                                                                                                                                                                                                                                                                                                                                                                                                                                                                                                                                                                                                                                                                                                                                                                                                                                                                                                                                                                                                                                                                                                              | 1<br>2<br>3                | YES<br>NO                                                                      | 1<br>2   |                        |                                                                              |   |                           |    |                                                            |                                            |   |    |                                                                         |   |   |                                     |                                             |   |                              |    |                                                                 |                        |   |    |                                                               |   |    |    |                                                                               |     |   |    |                                                                                                               |   |   |    |  |  |
|                                                                                                               | d. IMPLANTS: Women can have several small rods placed in their upper arm by a doctor or nurse which can prevent                                                                                                                                                                                                     | YES, SPONT<br>YES, RECOG                                                                                                                                                                                                                                                                                                                                                                                                                                                                                                                                                                                                                                                                                                                                                                                                                                                                                                                                                                                                                                                                                                                    | 1<br>2                     | YES<br>NO                                                                      | 1<br>2   |                        |                                                                              |   |                           |    |                                                            |                                            |   |    |                                                                         |   |   |                                     |                                             |   |                              |    |                                                                 |                        |   |    |                                                               |   |    |    |                                                                               |     |   |    |                                                                                                               |   |   |    |  |  |



|               |                                                                                                                                                                                                       |                                                                                                                                                                                                                                                       |             |                                                                                  |                                                      |
|---------------|-------------------------------------------------------------------------------------------------------------------------------------------------------------------------------------------------------|-------------------------------------------------------------------------------------------------------------------------------------------------------------------------------------------------------------------------------------------------------|-------------|----------------------------------------------------------------------------------|------------------------------------------------------|
|               | their upper arm by a doctor or nurse which can prevent pregnancy for one or more years.                                                                                                               | NO                                                                                                                                                                                                                                                    | 3           |                                                                                  |                                                      |
|               | e. MALE CONDOM: Men can put a rubber sheath on their erect penis before sexual intercourse.                                                                                                           | YES, SPONT<br>YES, RECOG<br>NO                                                                                                                                                                                                                        | 1<br>2<br>3 | YES<br>NO                                                                        | 1<br>2                                               |
|               | f. FEMALE CONDOM: Women can place a thin, transparent rubber in their vagina before sexual intercourse.                                                                                               | YES, SPONT<br>YES, RECOG<br>NO                                                                                                                                                                                                                        | 1<br>2<br>3 | YES<br>NO                                                                        | 1<br>2                                               |
|               | g. RHYTHM METHOD: Every month that a woman is sexually active she can avoid pregnancy by not having sexual intercourse on the days of the month she is most likely to get pregnant.                   | YES, SPONT<br>YES, RECOG<br>NO                                                                                                                                                                                                                        | 1<br>2<br>3 | YES<br>NO                                                                        | 1<br>2                                               |
|               | h. WITHDRAWAL: Men can pull out their penis from the vagina before ejaculation.                                                                                                                       | YES, SPONT<br>YES, RECOG<br>NO                                                                                                                                                                                                                        | 1<br>2<br>3 | YES<br>NO                                                                        | 1<br>2                                               |
|               | i. EMERGENCY CONTRACEPTION: As an emergency measure, women can take pills up to three days after having unprotected sex to avoid getting pregnant. These pills are also called "morning-after pills". | YES, SPONT<br>YES, RECOG<br>NO                                                                                                                                                                                                                        | 1<br>2<br>3 | YES<br>NO                                                                        | 1<br>2                                               |
| <b>FILTER</b> | <b>CHECK Q707. IF NEVER HAD SEX, SKIP TO 922</b>                                                                                                                                                      |                                                                                                                                                                                                                                                       |             |                                                                                  | <b>FILTER</b>                                        |
| <b>916</b>    | Are you currently doing something or using any method to delay or avoid getting pregnant?                                                                                                             | YES<br>NO<br>CURRENTLY PREGNANT                                                                                                                                                                                                                       |             |                                                                                  | 1<br>2<br>3<br><b>919</b><br><b>919</b>              |
| <b>917</b>    | Which method are you using?<br><br>[RECORD ALL MENTIONED]                                                                                                                                             |                                                                                                                                                                                                                                                       |             | YES NO                                                                           |                                                      |
|               |                                                                                                                                                                                                       | a. PILL<br>b. IUD<br>c. INJECTABLES<br>d. IMPLANTS<br>e. MALE CONDOM<br>f. FEMALE CONDOM<br>g. RHYTHM METHOD<br>h. WITHDRAWAL<br>i. BREASTFEEDING/ LACTATIONAL AMENORRHEA<br>j. EMERGENCY CONTRACEPTIVES<br>k. ABSTINENCE<br>l. OTHER (SPECIFY _____) |             | 1 2<br>1 2 | <b>919</b><br><b>919</b><br><b>919</b><br><b>919</b> |
| <b>918</b>    | [ASK IF ANSWER YES TO PILL, IUD, INJECTABLES, IMPLANTS, MALE CONDOM, EMERGENCY CONTRACEPTIVES OR FEMALE CONDOM IN 723]<br><br>Where did you obtain [CURRENT METHOD] the last time?                    | PRIVATE CLINIC<br>PUBLIC HOSPITAL<br>PUBLIC HEALTH CENTER/CLINIC<br>DISPENSARY<br>CHEMIST/PHARMACY<br>MOBILE/OUTREACH SERVICE<br>NGO FACILITY<br>OTHER (SPECIFY) .....                                                                                |             | 1<br>2<br>3<br>4<br>5<br>6<br>7<br>98                                            | <u>ALL</u><br><b>922</b>                             |
| <b>919</b>    | Do you know of a place where you can obtain a method of family planning?                                                                                                                              | YES<br>NO                                                                                                                                                                                                                                             |             | 1<br>2                                                                           | <b>922</b>                                           |
| <b>920</b>    | Where is that?<br>Any other place?<br><br>[RECORD ALL MENTIONED]                                                                                                                                      |                                                                                                                                                                                                                                                       |             | 1<br>2<br>3<br>4<br>5<br>6<br>7<br>98                                            | <b>920</b>                                           |
| <b>922</b>    | Have you talked about reproductive/sexual health issues with your MOTHER/FEMALE GUARDIAN in the last 6 months?                                                                                        | NO<br>YES<br>N/A                                                                                                                                                                                                                                      |             | 1<br>2<br>9                                                                      | <b>925</b><br><b>925</b>                             |
| <b>923</b>    | Which of the following reproductive/sexual health issues have you discussed?<br><br>[READ LIST; CHECK ALL THAT APPLY]                                                                                 | COMMUNICATION<br>SELF-ESTEEM<br>PREGNANCY<br>PUBERTY/HOW BOYS AND GIRLS MATURE<br>HIV/AIDS<br>MARRIED LIFE/ROLES IN FAMILY                                                                                                                            |             | YES NO<br>1 2<br>1 2<br>1 2<br>1 2<br>1 2<br>1 2                                 | <b>923</b>                                           |

|                                         |                                                                                                                                                                                                 |                                                                                                                                                                                                                               |                                                  |                                                 |                                                          |        |
|-----------------------------------------|-------------------------------------------------------------------------------------------------------------------------------------------------------------------------------------------------|-------------------------------------------------------------------------------------------------------------------------------------------------------------------------------------------------------------------------------|--------------------------------------------------|-------------------------------------------------|----------------------------------------------------------|--------|
|                                         |                                                                                                                                                                                                 | MENSTRUATION<br>CONTRACEPTIVES/FAMILY PLANNING<br>ABSTINENCE/AVOIDING SEX<br>HEALTH AND HYGIENE                                                                                                                               | 1<br>1<br>1<br>1                                 | 2<br>2<br>2<br>2                                |                                                          |        |
| 924                                     | Which other reproductive/sexual health issue did you discuss? (SPECIFY)                                                                                                                         | _____ NONE=                                                                                                                                                                                                                   |                                                  | 0                                               |                                                          | 924    |
| 925                                     | Have you talked about reproductive/sexual health issues with your FATHER /MALE GUARDIAN in the last 6 months?                                                                                   | NO<br>YES<br>N/A                                                                                                                                                                                                              |                                                  | 1<br>2<br>9                                     | 928<br>928                                               | 925    |
| 926                                     | Which of the following reproductive/sexual health issues have you discussed?<br><br>[READ LIST; CHECK ALL THAT APPLY]                                                                           | COMMUNICATION<br>SELF-ESTEEM<br>PREGNANCY<br>PUBERTY/HOW BOYS AND GIRLS MATURE<br>HIV/AIDS<br>MARRIED LIFE/ROLES IN FAMILY<br>MENSTRUATION<br>CONTRACEPTIVES/FAMILY PLANNING<br>ABSTINENCE/AVOIDING SEX<br>HEALTH AND HYGIENE | YES<br>1<br>1<br>1<br>1<br>1<br>1<br>1<br>1<br>1 | NO<br>2<br>2<br>2<br>2<br>2<br>2<br>2<br>2<br>2 |                                                          | 926    |
| 927                                     | Which other reproductive/sexual health issue did you discuss? (SPECIFY)                                                                                                                         | _____ NONE=                                                                                                                                                                                                                   |                                                  | 0                                               |                                                          | 927    |
| 928                                     | Sometimes women experience a bad smelling abnormal genital discharge. During the last 12 months, have you had a bad smelling abnormal genital discharge?                                        | YES<br>NO<br>DON'T KNOW                                                                                                                                                                                                       |                                                  | 1<br>2<br>88                                    |                                                          | 928    |
| 929                                     | Sometimes women experience pain when urinating, together with a frequent need to urinate. During the last 12 months, have you had pain when urinating together with a frequent need to urinate? | YES<br>NO<br>DON'T KNOW                                                                                                                                                                                                       |                                                  | 1<br>2<br>88                                    |                                                          | 929    |
| 930                                     | Sometimes women have a genital sore or genital ulcer. During the last 12 months, have you had a genital sore or genital ulcer?                                                                  | YES<br>NO<br>DON'T KNOW                                                                                                                                                                                                       |                                                  | 1<br>2<br>88                                    |                                                          | 930    |
|                                         | <b>Check 922, 923 &amp; 924. IF NO SYMPTOMS, GO TO FILTER</b>                                                                                                                                   |                                                                                                                                                                                                                               |                                                  |                                                 | FILTER                                                   |        |
| 931                                     | Did you seek treatment for these symptoms?                                                                                                                                                      | YES<br>NO                                                                                                                                                                                                                     |                                                  | 1<br>2                                          | 933                                                      | 931    |
| 932                                     | Why didn't you seek treatment for these symptoms?                                                                                                                                               | 1 = Didn't know where to go<br>2 = No money for treatment<br>3 = Facility too far<br>4 = Symptoms cleared up by themselves<br>5 = Unfriendly staff<br>6 = Other (SPECIFY _____)                                               |                                                  | 1<br>2<br>3<br>4<br>5<br>98                     | FILTER<br>FILTER<br>FILTER<br>FILTER<br>FILTER<br>FILTER | 932    |
| 933                                     | From where did you seek advice or treatment the last time you had these symptoms?                                                                                                               | PRIVATE CLINIC/HOSPITAL<br>PUBLIC HOSPITAL<br>PUBLIC HEALTH CENTER/CLINIC<br>DISPENSARY<br>CHEMIST/PHARMACY<br>MOBILE/OUTREACH SERVICE<br>NGO FACILITY<br>OTHER (SPECIFY) .....                                               |                                                  | 1<br>2<br>3<br>4<br>5<br>6<br>7<br>98           |                                                          | 933    |
| <b>SECTION 10: PREGNANCY AND BIRTHS</b> |                                                                                                                                                                                                 |                                                                                                                                                                                                                               |                                                  |                                                 |                                                          |        |
| FILTER                                  | [IF NEVER HAD SEX) → Q1012]                                                                                                                                                                     |                                                                                                                                                                                                                               |                                                  |                                                 | 1012                                                     | FILTER |
| <b>QUESTIONS</b>                        |                                                                                                                                                                                                 | <b>RESPONSES</b>                                                                                                                                                                                                              |                                                  |                                                 |                                                          |        |
| 1001                                    | Now I would like to ask you about all the births you have had during your life. Have you ever given birth?                                                                                      | YES<br>NO                                                                                                                                                                                                                     |                                                  | 1<br>2                                          | 1003                                                     | 1001   |
| 1002                                    | Have you ever given birth to a boy or girl who was born alive but later died?                                                                                                                   | YES<br>NO                                                                                                                                                                                                                     |                                                  | 1<br>2                                          | 1005                                                     | 1002   |
| 1003                                    | How many births have you had <u>in total</u> during your life?                                                                                                                                  | TOTAL BIRTHS<br>[1-5]                                                                                                                                                                                                         |                                                  | <input type="text"/>                            |                                                          | 1003   |

|                                            |                                                                                                                                                                                 |                                                                           |                                      |          |      |
|--------------------------------------------|---------------------------------------------------------------------------------------------------------------------------------------------------------------------------------|---------------------------------------------------------------------------|--------------------------------------|----------|------|
| 1005                                       | How old were you when you first gave birth/had a miscarriage/still birth                                                                                                        | Age<br>Don't Know                                                         | <input type="text"/><br>88<br>[1-19] |          | 1005 |
| 1004                                       | Have you ever had a pregnancy that miscarried, or ended in a still birth?                                                                                                       | YES<br>NO                                                                 | 1<br>2<br>88<br>[1-19]               |          | 1004 |
| 1006                                       | Are you pregnant now?                                                                                                                                                           | YES<br>NO<br>UNSURE/DON'T KNOW                                            | 1<br>2<br>88                         | F3<br>F3 | 1006 |
| 1007                                       | How many months pregnant are you?<br>[RECORD NUMBER OF COMPLETED MONTHS]                                                                                                        | MONTHS<br>[0-10]<br>DON'T KNOW                                            | <input type="text"/><br>88           |          | 1007 |
| F3                                         | [IF ALL OF 1001, 1002, 1005, AND 1006 = NO → 1012]                                                                                                                              |                                                                           |                                      |          | F3   |
| 1008                                       | When you found out you were pregnant for the very first time, were you still attending school?                                                                                  | YES<br>NO                                                                 | 1<br>2                               |          | 1008 |
| 1009                                       | When you found out you were pregnant for the very first time, were you single, engaged or married?                                                                              | SINGLE<br>ENGAGED<br>MARRIED                                              | 1<br>2<br>3                          |          | 1009 |
| 1010                                       | At the time you first became pregnant, did you want to become pregnant <u>then</u> , did you want to wait until <u>later</u> , or did you <u>not want</u> the pregnancy at all? | THEN<br>ONE TO TWO YEARS LATER<br>THREE OR MORE YEARS LATER<br>NOT AT ALL | 1<br>2<br>3<br>4                     |          | 1010 |
| 1011                                       | Sometimes a girl becomes pregnant when she does not want to be. Have you ever been pregnant when you did not want to be?                                                        | YES<br>NO                                                                 | 1<br>2                               |          | 1011 |
| 1012                                       | Now I have a question about the future. Would you like to have (a/another) child, or would you prefer not to have any (more) children?                                          | YES<br>NO<br>DON'T KNOW                                                   | 1<br>2<br>88                         | 1014     | 1012 |
| 1013                                       | At what age would you like to have (a/another) child?                                                                                                                           | Age<br>Don't Know                                                         | <input type="text"/><br>88<br>[1-50] |          | 1013 |
| 1014                                       | If you became pregnant now, how happy would you be? Would you say, very happy, somewhat happy, or not happy at all?                                                             | VERY HAPPY<br>SOMEWHAT HAPPY<br>NOT HAPPY AT ALL                          | 1<br>2<br>3                          |          | 1014 |
| <b>SECTION 11: HIV/AIDS AND OTHER STIs</b> |                                                                                                                                                                                 |                                                                           |                                      |          |      |
| <b>QUESTIONS</b>                           |                                                                                                                                                                                 |                                                                           | <b>RESPONSES</b>                     |          |      |
| 1101                                       | Now I would like to talk about something else. Have you ever heard of an illness called AIDS?                                                                                   | YES<br>NO                                                                 | 1<br>2                               | 1117     | 1101 |
| 1102                                       | Can people reduce their chances of getting the AIDS virus by having just one uninfected sex partner who has no other sex partners?                                              | YES<br>NO<br>DON'T KNOW                                                   | 1<br>2<br>88                         |          | 1102 |
| 1103                                       | Can people get the AIDS virus from mosquito bites?                                                                                                                              | YES<br>NO<br>DON'T KNOW                                                   | 1<br>2<br>88                         |          | 1103 |
| 1104                                       | Can people reduce their chance of getting the AIDS virus by using a condom every time they have sex?                                                                            | YES<br>NO<br>DON'T KNOW                                                   | 1<br>2<br>88                         |          | 1104 |
| 1105                                       | Can people get the AIDS virus by sharing food with a person who has AIDS?                                                                                                       | YES<br>NO<br>DON'T KNOW                                                   | 1<br>2<br>88                         |          | 1105 |
| 1106                                       | Can people reduce their chance of getting the AIDS virus by not having sexual intercourse at all?                                                                               | YES<br>NO<br>DON'T KNOW                                                   | 1<br>2<br>88                         |          | 1106 |
| 1107                                       | Can people get the AIDS virus because of witchcraft or other supernatural means?                                                                                                | YES<br>NO<br>DON'T KNOW                                                   | 1<br>2<br>88                         |          | 1107 |
| 1108                                       | Is it possible for a healthy-looking person to have the AIDS virus?                                                                                                             | YES                                                                       | 1                                    |          | 1108 |

|                                                 |                                                                                                                                                     |                                                                                                                                                                                                                                                                                                                                                                     |                                                                                            |              |      |
|-------------------------------------------------|-----------------------------------------------------------------------------------------------------------------------------------------------------|---------------------------------------------------------------------------------------------------------------------------------------------------------------------------------------------------------------------------------------------------------------------------------------------------------------------------------------------------------------------|--------------------------------------------------------------------------------------------|--------------|------|
|                                                 | is it possible for a healthy-looking person to have the AIDS virus:                                                                                 | NO<br>DON'T KNOW                                                                                                                                                                                                                                                                                                                                                    | 2<br>88                                                                                    |              |      |
| 1109                                            | Can the virus that causes AIDS be transmitted from a mother to her baby:<br><br>a. During pregnancy?<br>b. During delivery?<br>c. By breastfeeding? | a. DURING PREGNANCY<br>b. DURING DELIVERY<br>c. BREASTFEEDING                                                                                                                                                                                                                                                                                                       | YES NO DK<br>1 2 88<br>1 2 88<br>1 2 88                                                    |              | 1109 |
| 1110                                            | Do you think your risk of getting infected with HIV is low, medium or high, or do you have no risk at all?                                          | LOW<br>MEDIUM<br>HIGH<br>NO RISK<br>ALREADY INFECTED<br>DON'T KNOW                                                                                                                                                                                                                                                                                                  | 1<br>2<br>3<br>4<br>5<br>88                                                                | 1115         | 1110 |
| 1111                                            | I don't want to know the results, so please do not tell me, but have you ever been tested to see if you have the AIDS virus?                        | YES<br>NO                                                                                                                                                                                                                                                                                                                                                           | 1<br>2                                                                                     | 1115         | 1111 |
| 1112                                            | When was the last time you were tested?                                                                                                             | LESS THAN 6 MONTHS AGO<br>LESS THAN 12 MONTHS AGO<br>12 - 23 MONTHS AGO<br>2 OR MORE YEARS AGO                                                                                                                                                                                                                                                                      | 1<br>2<br>3<br>4                                                                           |              | 1112 |
| 1113                                            | The last time you had the test, did you yourself ask for the test, was it offered to you and you accepted, or was it required?                      | ASKED FOR THE TEST<br>OFFERED AND ACCEPTED<br>REQUIRED                                                                                                                                                                                                                                                                                                              | 1<br>2<br>3                                                                                |              | 1113 |
| 1114                                            | I don't want to know the results, so please don't tell me, but did you get the results of the test?                                                 | YES<br>NO                                                                                                                                                                                                                                                                                                                                                           | 1<br>2                                                                                     | 1116<br>1116 | 1114 |
| 1115                                            | Do you know of a place where people can go to get tested for the AIDS virus?                                                                        | YES<br>NO                                                                                                                                                                                                                                                                                                                                                           | 1<br>2                                                                                     |              | 1115 |
| 1116                                            | Do you personally know someone who has or is suspected to have the AIDS virus?                                                                      | YES<br>NO                                                                                                                                                                                                                                                                                                                                                           | 1<br>2                                                                                     |              | 1116 |
| <b>Sexually Transmitted Infections/Diseases</b> |                                                                                                                                                     |                                                                                                                                                                                                                                                                                                                                                                     |                                                                                            |              |      |
| 1117                                            | Besides HIV, do you know of any other diseases that can be transmitted through sexual intercourse?                                                  | YES<br>NO<br>NO RESPONSE                                                                                                                                                                                                                                                                                                                                            | 1<br>2<br>96                                                                               | 1201<br>1201 | 1117 |
| 1118                                            | Can you describe any symptoms of STIs in women?<br><br><b>DO NOT READ THE LIST. MORE THAN ONE ANSWER IS POSSIBLE. CIRCLE ALL THAT APPLY</b>         | A. Abdominal pain<br>B. Genital discharge<br>C. Foul-smelling discharge<br>D. Burning pain on urination<br>E. Genital ulcers/sores<br>F. Genital warts<br>G. Swellings in the groin area<br>H. Itching<br>I. Other (SPECIFY) _____<br>J. Don't know                                                                                                                 | YES NO<br>1 2<br>1 2<br>1 2<br>1 2<br>1 2<br>1 2<br>1 2<br>1 2<br>1 2<br>1 2               |              | 1118 |
| 1119                                            | Can you describe any symptoms of STIs in men?<br><br><b>DO NOT READ THE LIST. MORE THAN ONE ANSWER IS POSSIBLE. CIRCLE ALL THAT APPLY.</b>          | A. Discharge from the penis<br>B. Discharge from the anus<br>C. Burning pain on urination<br>D. Genital ulcers/sores<br>E. Swellings in the groin area<br>F. Can't retract the foreskin<br>G. Ulcer/sores on the anus<br>H. Ulcers/sores on the penis<br>I. Ulcers/sores in the throat<br>J. Lower abdominal pain<br>K. Other (SPECIFY)..... _____<br>L. Don't know | YES NO<br>1 2<br>1 2 |              | 1119 |
| 1120                                            | Now I will read you some statements about STIs/STDs and I will want you to tell me whether you Agree or Disagree with each of them.                 |                                                                                                                                                                                                                                                                                                                                                                     |                                                                                            |              | 1120 |
|                                                 | One can have STD/STIs without showing any symptoms                                                                                                  | AGREE<br>DISAGREE<br>DON'T KNOW                                                                                                                                                                                                                                                                                                                                     | 1<br>2<br>88                                                                               |              |      |
|                                                 | All STIs/STDs can only be transmitted via sexual intercourse                                                                                        | AGREE<br>DISAGREE<br>DON'T KNOW                                                                                                                                                                                                                                                                                                                                     | 1<br>2<br>88                                                                               |              |      |

|                                          |                                                                                                                                                                                                                                                   |                                                                                                                                                                                                       |                                       |                  |      |
|------------------------------------------|---------------------------------------------------------------------------------------------------------------------------------------------------------------------------------------------------------------------------------------------------|-------------------------------------------------------------------------------------------------------------------------------------------------------------------------------------------------------|---------------------------------------|------------------|------|
|                                          | Condoms protect against most STDs/STIs                                                                                                                                                                                                            | AGREE<br>DISAGREE<br>DON'T KNOW                                                                                                                                                                       | 1<br>2<br>88                          |                  |      |
| 1121                                     | Have you had or suspected that you had an STI in the past 6 months?                                                                                                                                                                               | YES<br>NO<br>NO RESPONSE                                                                                                                                                                              | 1<br>2<br>96                          | 1201<br>1201     | 1121 |
| 1122                                     | Did you seek treatment for the STI?                                                                                                                                                                                                               | YES<br>NO                                                                                                                                                                                             | 1<br>2                                | 1124             | 1122 |
| 1123                                     | Why didn't you seek treatment for the STI?                                                                                                                                                                                                        | 1 = Didn't know where to go<br>2 = No money for treatment<br>3 = Facility too far<br>4 = Symptoms cleared up by themselves<br>5 = Unfriendly staff<br>6 = Self medicated<br>7 = Other (SPECIFY _____) | 1<br>2<br>3<br>4<br>5<br>6<br>98      | ALL<br>1201      | 1123 |
| 1124                                     | From where did you seek advice or treatment the last time you had the STI?                                                                                                                                                                        | PRIVATE CLINIC<br>PUBLIC HOSPITAL<br>PUBLIC HEALTH CENTER/CLINIC<br>DISPENSARY<br>CHEMIST/PHARMACY<br>MOBILE/OUTREACH SERVICE<br>NGO FACILITY<br>OTHER (SPECIFY) .....                                | 1<br>2<br>3<br>4<br>5<br>6<br>7<br>98 |                  | 1124 |
| <b>SECTION 12: GBV/DOMESTIC VIOLENCE</b> |                                                                                                                                                                                                                                                   |                                                                                                                                                                                                       |                                       |                  |      |
| <b>QUESTIONS</b>                         |                                                                                                                                                                                                                                                   |                                                                                                                                                                                                       | <b>RESPONSES</b>                      |                  |      |
| 1201                                     | I am going to read a series of statements about marriage and I want you to tell me if you agree or disagree with the statement.                                                                                                                   |                                                                                                                                                                                                       |                                       |                  | 1201 |
|                                          | a. If a young woman in this community were age 25 and unmarried, people would respect her.                                                                                                                                                        | AGREE<br>1                                                                                                                                                                                            | DISAGREE<br>2                         | DON'T KNOW<br>88 |      |
|                                          | b. It is OK for a man to cook for his family.                                                                                                                                                                                                     | 1                                                                                                                                                                                                     | 2                                     | 88               |      |
|                                          | c. Polygamous marriages are part of your culture, so they should continue.                                                                                                                                                                        | 1                                                                                                                                                                                                     | 2                                     | 88               |      |
|                                          | d. It is better if a girls' family arranges her marriage, than her choosing herself.                                                                                                                                                              | 1                                                                                                                                                                                                     | 2                                     | 88               |      |
|                                          | e. If a man doesn't hit his wife, it means he doesn't love her.                                                                                                                                                                                   | 1                                                                                                                                                                                                     | 2                                     | 88               |      |
|                                          | f. It is a man's right to have sex with his wife whenever he wants.                                                                                                                                                                               | 1                                                                                                                                                                                                     | 2                                     | 88               |      |
|                                          | g. A wife should be able to refuse her husband sex.                                                                                                                                                                                               | 1                                                                                                                                                                                                     | 2                                     | 88               |      |
|                                          | h. If a husband and wife disagree on using family planning, the husband's opinion should come first                                                                                                                                               | 1                                                                                                                                                                                                     | 2                                     | 88               |      |
|                                          | i. Girls my age would become promiscuous if they knew where to get family planning                                                                                                                                                                | 1                                                                                                                                                                                                     | 2                                     | 88               |      |
| 1202                                     | <b>ATTITUDES TOWARDS GENDER VIOLENCE</b>                                                                                                                                                                                                          |                                                                                                                                                                                                       |                                       |                  |      |
|                                          | I am now going to ask you to think about several situations involving a husband and a wife. When you think about these questions, please keep in mind that we are asking for your opinion about each situation, not your own personal experience. |                                                                                                                                                                                                       |                                       |                  |      |
|                                          | Sometimes a husband is annoyed or angered by things that his wife does. In your opinion, is a husband justified in hitting or beating his wife in the following situations:                                                                       |                                                                                                                                                                                                       |                                       |                  |      |
|                                          | a. If she goes out without telling him?                                                                                                                                                                                                           | a. GOES OUT                                                                                                                                                                                           | YES<br>1                              | NO<br>2          |      |
|                                          | b. If she neglects the children?                                                                                                                                                                                                                  | b. NEGLECT CHILDREN                                                                                                                                                                                   | 1                                     | 2                |      |
|                                          | c. If she argues with him?                                                                                                                                                                                                                        | c. ARGUES                                                                                                                                                                                             | 1                                     | 2                |      |
|                                          | d. If she refuses to have sex with him?                                                                                                                                                                                                           | d. REFUSES SEX                                                                                                                                                                                        | 1                                     | 2                |      |
|                                          | e. If she burns the food?                                                                                                                                                                                                                         | e. BURNS FOOD                                                                                                                                                                                         | 1                                     | 2                |      |
| 1203                                     | Sometimes children feel unsafe or threatened while at school, or                                                                                                                                                                                  | Often                                                                                                                                                                                                 |                                       | 1                | 1203 |

|      |                                                                                                                                                                                        |                                                                                                                                                                                                                                                           |                                                                                                                                                  |                      |                  |              |                      |
|------|----------------------------------------------------------------------------------------------------------------------------------------------------------------------------------------|-----------------------------------------------------------------------------------------------------------------------------------------------------------------------------------------------------------------------------------------------------------|--------------------------------------------------------------------------------------------------------------------------------------------------|----------------------|------------------|--------------|----------------------|
|      | when they are going to or from school. For example, afraid of being attacked, bullied or abused. How often has this happened to you; often, sometimes or never?                        | Sometimes<br>Never<br>Don't know<br>Refused                                                                                                                                                                                                               | 2<br>3<br>88<br>96                                                                                                                               | 1206<br>1206<br>1206 |                  |              |                      |
| 1204 | Who makes you feel unsafe or threatened at school or when going to/from school (you do not have to say their name)?<br><br>(CHECK ALL THAT APPLY)                                      | A male teacher<br>A female teacher<br>A male students<br>A female students<br>A male who is not a student at your school<br>Other adults (SPECIFY)<br>Other things (example: dogs, other animals)                                                         | YES<br>1<br>1<br>1<br>1<br>1<br>1<br>1<br>NO<br>2<br>2<br>2<br>2<br>2<br>2<br>2                                                                  |                      | 1204             |              |                      |
|      | Other: What adults do you feel threatened by? _____                                                                                                                                    |                                                                                                                                                                                                                                                           |                                                                                                                                                  |                      |                  |              |                      |
|      | Other: What other things do you feel threatened by? _____                                                                                                                              |                                                                                                                                                                                                                                                           |                                                                                                                                                  |                      |                  |              |                      |
| 1205 | Can you tell me where you feel unsafe or threatened while at school or when going to/from school? (CHECK ALL THAT APPLY)                                                               | On the way to or from school<br>In the school yard<br>In the classroom<br>In the school toilet or latrine<br>Refused<br>On the playing field<br>Other (SPECIFY) _____                                                                                     | YES<br>1<br>1<br>1<br>1<br>1<br>1<br>1<br>NO<br>2<br>2<br>2<br>2<br>2<br>2                                                                       |                      | 1205             |              |                      |
| 1206 | Is there a person who you would go to for help if you felt threatened or unsafe at school or when going to/from school?                                                                | YES<br>NO<br>DON'T KNOW                                                                                                                                                                                                                                   | 1<br>2<br>88                                                                                                                                     | 1208<br>1208         | 1206             |              |                      |
| 1207 | Who are the people you would go to for help if you felt unsafe or threatened while at school or when going to/from school? (CHECK ALL THAT APPLY)                                      | Mother<br>Father<br>Brother<br>Sister<br>Male friend<br>Female friend<br>Boyfriend<br>Female teacher<br>Male teacher<br>Female mentor or coach<br>Male mentor or coach<br>Religious leader<br>Local administration<br>Other relative<br>Other nonrelative | YES<br>1<br>1<br>1<br>1<br>1<br>1<br>1<br>1<br>1<br>1<br>1<br>1<br>1<br>1<br>1<br>1<br>NO<br>2<br>2<br>2<br>2<br>2<br>2<br>2<br>2<br>2<br>2<br>2 |                      | 1207             |              |                      |
| 1208 | Has any MALE ever done any of the following things to you, if so, when is the last time it happened: in the last month, in the last 6 months in the last year or more than a year ago? |                                                                                                                                                                                                                                                           |                                                                                                                                                  |                      | 1208             |              |                      |
|      |                                                                                                                                                                                        | 1208a                                                                                                                                                                                                                                                     | 1208b                                                                                                                                            | 1208c                |                  |              |                      |
|      |                                                                                                                                                                                        | Ever Happen                                                                                                                                                                                                                                               | Relation to Male                                                                                                                                 | WHEN HAPPENED        |                  |              |                      |
|      |                                                                                                                                                                                        | YES NO                                                                                                                                                                                                                                                    | Codes Below                                                                                                                                      | IN THE LAST MONTH    | IN LAST 6 MONTHS | IN LAST YEAR | MORE THAN 1 YEAR AGO |
|      | A. Say or do something to humiliate you in front of others?                                                                                                                            | 1 2                                                                                                                                                                                                                                                       |                                                                                                                                                  | 1                    | 2                | 3            | 4                    |
|      | B. Threaten to hurt or harm you or someone close to you?                                                                                                                               | 1 2                                                                                                                                                                                                                                                       |                                                                                                                                                  | 1                    | 2                | 3            | 4                    |
|      | C. Insult you or make you feel bad about yourself?                                                                                                                                     | 1 2                                                                                                                                                                                                                                                       |                                                                                                                                                  | 1                    | 2                | 3            | 4                    |
|      | D. Push you, shake you, or throw something at you                                                                                                                                      | 1 2                                                                                                                                                                                                                                                       |                                                                                                                                                  | 1                    | 2                | 3            | 4                    |
|      | E. Slap you                                                                                                                                                                            | 1 2                                                                                                                                                                                                                                                       |                                                                                                                                                  | 1                    | 2                | 3            | 4                    |
|      | F. Twist your arm or pull your hair                                                                                                                                                    | 1 2                                                                                                                                                                                                                                                       |                                                                                                                                                  | 1                    | 2                | 3            | 4                    |
|      | G. Punch you with his fist or something that could hurt you                                                                                                                            | 1 2                                                                                                                                                                                                                                                       |                                                                                                                                                  | 1                    | 2                | 3            | 4                    |
|      | H. Kick you, drag you, or beat you up                                                                                                                                                  | 1 2                                                                                                                                                                                                                                                       |                                                                                                                                                  | 1                    | 2                | 3            | 4                    |
|      | I. Try to choke you or burn you on purpose                                                                                                                                             | 1 2                                                                                                                                                                                                                                                       |                                                                                                                                                  | 1                    | 2                | 3            | 4                    |
|      | J. Threatened to attack you with a knife or other weapon                                                                                                                               | 1 2                                                                                                                                                                                                                                                       |                                                                                                                                                  | 1                    | 2                | 3            | 4                    |
|      | K. Attacked you with a weapon                                                                                                                                                          | 1 2                                                                                                                                                                                                                                                       |                                                                                                                                                  | 1                    | 2                | 3            | 4                    |
|      | L. Touched you in a sexual way (e.g. kissing, grabbing, or fondling), when you did not want them to                                                                                    | 1 2                                                                                                                                                                                                                                                       |                                                                                                                                                  | 1                    | 2                | 3            | 4                    |
|      | M. Try to have sexual intercourse with you when you did not want                                                                                                                       | 1 2                                                                                                                                                                                                                                                       |                                                                                                                                                  | 1                    | 2                | 3            | 4                    |
|      | N. Physically forced you to have sexual intercourse even when                                                                                                                          | 1 2                                                                                                                                                                                                                                                       |                                                                                                                                                  | 1                    | 2                | 3            | 4                    |
|      | O. Forced you to perform sexual acts when you did not want to                                                                                                                          | 1 2                                                                                                                                                                                                                                                       |                                                                                                                                                  | 1                    | 2                | 3            | 4                    |
|      |                                                                                                                                                                                        | RELATIONSHIP CODES FOR 1208b<br>1 = Husband                      6 = Neighbor                      11 = Co-worker                                                                                                                                         |                                                                                                                                                  |                      |                  |              |                      |

|                                                                                                                                                                                                                                                                                                                                                                                           |                                                                                                                                                                                                 | 2 = Boyfriend<br>3 = Fiancé<br>4 = Friend, acquaintance<br>5 = Relative                                                                                                                                                                                                                                                                                                                                                                                                                                                                                                                                                                                                                                                                                                                                                                                                                                                                                                                                                                                                                                                                                                                                                                                                                                                                                                                                                                                                                                                                                                                                                                                                                                                                                                                                                                                                                                                                                                                                                                                                                                                                                                                                                                                                                       | 7 = Fellow student<br>8 = Teacher<br>9 = Foreigner/tourist<br>10 = Employer | 12 = Parent/Guardian<br>13 = House guard<br>14 = House boy<br>15 = Stranger/unknown person<br>16 = Other ..... |           |              |            |        |                                                            |   |   |                                    |    |    |                                                           |   |   |        |    |    |                                                      |   |   |                  |    |    |                                                                                                          |   |   |        |    |    |                                                      |   |   |                             |    |    |                                             |   |   |         |    |    |                                          |   |   |               |    |    |      |
|-------------------------------------------------------------------------------------------------------------------------------------------------------------------------------------------------------------------------------------------------------------------------------------------------------------------------------------------------------------------------------------------|-------------------------------------------------------------------------------------------------------------------------------------------------------------------------------------------------|-----------------------------------------------------------------------------------------------------------------------------------------------------------------------------------------------------------------------------------------------------------------------------------------------------------------------------------------------------------------------------------------------------------------------------------------------------------------------------------------------------------------------------------------------------------------------------------------------------------------------------------------------------------------------------------------------------------------------------------------------------------------------------------------------------------------------------------------------------------------------------------------------------------------------------------------------------------------------------------------------------------------------------------------------------------------------------------------------------------------------------------------------------------------------------------------------------------------------------------------------------------------------------------------------------------------------------------------------------------------------------------------------------------------------------------------------------------------------------------------------------------------------------------------------------------------------------------------------------------------------------------------------------------------------------------------------------------------------------------------------------------------------------------------------------------------------------------------------------------------------------------------------------------------------------------------------------------------------------------------------------------------------------------------------------------------------------------------------------------------------------------------------------------------------------------------------------------------------------------------------------------------------------------------------|-----------------------------------------------------------------------------|----------------------------------------------------------------------------------------------------------------|-----------|--------------|------------|--------|------------------------------------------------------------|---|---|------------------------------------|----|----|-----------------------------------------------------------|---|---|--------|----|----|------------------------------------------------------|---|---|------------------|----|----|----------------------------------------------------------------------------------------------------------|---|---|--------|----|----|------------------------------------------------------|---|---|-----------------------------|----|----|---------------------------------------------|---|---|---------|----|----|------------------------------------------|---|---|---------------|----|----|------|
| 1209                                                                                                                                                                                                                                                                                                                                                                                      | Thinking about what you have experienced among the different things we have been talking about, have you ever tried to seek help to stop them/the/those person(s) from doing this to you again? | YES 1<br>NO 2                                                                                                                                                                                                                                                                                                                                                                                                                                                                                                                                                                                                                                                                                                                                                                                                                                                                                                                                                                                                                                                                                                                                                                                                                                                                                                                                                                                                                                                                                                                                                                                                                                                                                                                                                                                                                                                                                                                                                                                                                                                                                                                                                                                                                                                                                 | 1212                                                                        | 1209                                                                                                           |           |              |            |        |                                                            |   |   |                                    |    |    |                                                           |   |   |        |    |    |                                                      |   |   |                  |    |    |                                                                                                          |   |   |        |    |    |                                                      |   |   |                             |    |    |                                             |   |   |         |    |    |                                          |   |   |               |    |    |      |
| 1210                                                                                                                                                                                                                                                                                                                                                                                      | From whom have you sought help?<br><br>Any one else?<br><br>[RECORD ALL MENTIONED]                                                                                                              | <table style="width:100%; border-collapse: collapse;"> <tr> <td></td> <td style="text-align: center;">YES</td> <td style="text-align: center;">NO</td> </tr> <tr> <td>OWN FAMILY</td> <td style="text-align: center;">1</td> <td style="text-align: center;">2</td> </tr> <tr> <td>HUSBAND/PARTNER'S FAMILY</td> <td style="text-align: center;">1</td> <td style="text-align: center;">2</td> </tr> <tr> <td>CURRENT/LAST/LATE HUSBAND/ PARTNER</td> <td style="text-align: center;">1</td> <td style="text-align: center;">2</td> </tr> <tr> <td>CURRENT/FORMER BOYFRIEND</td> <td style="text-align: center;">1</td> <td style="text-align: center;">2</td> </tr> <tr> <td>FRIEND</td> <td style="text-align: center;">1</td> <td style="text-align: center;">2</td> </tr> <tr> <td>NEIGHBOR</td> <td style="text-align: center;">1</td> <td style="text-align: center;">2</td> </tr> <tr> <td>RELIGIOUS LEADER</td> <td style="text-align: center;">1</td> <td style="text-align: center;">2</td> </tr> <tr> <td>DOCTOR/MEDICAL PERSONNEL</td> <td style="text-align: center;">1</td> <td style="text-align: center;">2</td> </tr> <tr> <td>POLICE</td> <td style="text-align: center;">1</td> <td style="text-align: center;">2</td> </tr> <tr> <td>LAWYER</td> <td style="text-align: center;">1</td> <td style="text-align: center;">2</td> </tr> <tr> <td>SOCIAL SERVICE ORGANIZATION</td> <td style="text-align: center;">1</td> <td style="text-align: center;">2</td> </tr> <tr> <td>COMMUNITYLEADER/LOCAL ADMN L</td> <td style="text-align: center;">1</td> <td style="text-align: center;">2</td> </tr> <tr> <td>TEACHER</td> <td style="text-align: center;">1</td> <td style="text-align: center;">2</td> </tr> <tr> <td>OTHER</td> <td style="text-align: center;">1</td> <td style="text-align: center;">2</td> </tr> <tr> <td style="text-align: center;">SPECIFY _____</td> <td></td> <td></td> </tr> </table>                                                                                                                                                                                                                                                                                                                                                            |                                                                             | YES                                                                                                            | NO        | OWN FAMILY   | 1          | 2      | HUSBAND/PARTNER'S FAMILY                                   | 1 | 2 | CURRENT/LAST/LATE HUSBAND/ PARTNER | 1  | 2  | CURRENT/FORMER BOYFRIEND                                  | 1 | 2 | FRIEND | 1  | 2  | NEIGHBOR                                             | 1 | 2 | RELIGIOUS LEADER | 1  | 2  | DOCTOR/MEDICAL PERSONNEL                                                                                 | 1 | 2 | POLICE | 1  | 2  | LAWYER                                               | 1 | 2 | SOCIAL SERVICE ORGANIZATION | 1  | 2  | COMMUNITYLEADER/LOCAL ADMN L                | 1 | 2 | TEACHER | 1  | 2  | OTHER                                    | 1 | 2 | SPECIFY _____ |    |    | 1210 |
|                                                                                                                                                                                                                                                                                                                                                                                           | YES                                                                                                                                                                                             | NO                                                                                                                                                                                                                                                                                                                                                                                                                                                                                                                                                                                                                                                                                                                                                                                                                                                                                                                                                                                                                                                                                                                                                                                                                                                                                                                                                                                                                                                                                                                                                                                                                                                                                                                                                                                                                                                                                                                                                                                                                                                                                                                                                                                                                                                                                            |                                                                             |                                                                                                                |           |              |            |        |                                                            |   |   |                                    |    |    |                                                           |   |   |        |    |    |                                                      |   |   |                  |    |    |                                                                                                          |   |   |        |    |    |                                                      |   |   |                             |    |    |                                             |   |   |         |    |    |                                          |   |   |               |    |    |      |
| OWN FAMILY                                                                                                                                                                                                                                                                                                                                                                                | 1                                                                                                                                                                                               | 2                                                                                                                                                                                                                                                                                                                                                                                                                                                                                                                                                                                                                                                                                                                                                                                                                                                                                                                                                                                                                                                                                                                                                                                                                                                                                                                                                                                                                                                                                                                                                                                                                                                                                                                                                                                                                                                                                                                                                                                                                                                                                                                                                                                                                                                                                             |                                                                             |                                                                                                                |           |              |            |        |                                                            |   |   |                                    |    |    |                                                           |   |   |        |    |    |                                                      |   |   |                  |    |    |                                                                                                          |   |   |        |    |    |                                                      |   |   |                             |    |    |                                             |   |   |         |    |    |                                          |   |   |               |    |    |      |
| HUSBAND/PARTNER'S FAMILY                                                                                                                                                                                                                                                                                                                                                                  | 1                                                                                                                                                                                               | 2                                                                                                                                                                                                                                                                                                                                                                                                                                                                                                                                                                                                                                                                                                                                                                                                                                                                                                                                                                                                                                                                                                                                                                                                                                                                                                                                                                                                                                                                                                                                                                                                                                                                                                                                                                                                                                                                                                                                                                                                                                                                                                                                                                                                                                                                                             |                                                                             |                                                                                                                |           |              |            |        |                                                            |   |   |                                    |    |    |                                                           |   |   |        |    |    |                                                      |   |   |                  |    |    |                                                                                                          |   |   |        |    |    |                                                      |   |   |                             |    |    |                                             |   |   |         |    |    |                                          |   |   |               |    |    |      |
| CURRENT/LAST/LATE HUSBAND/ PARTNER                                                                                                                                                                                                                                                                                                                                                        | 1                                                                                                                                                                                               | 2                                                                                                                                                                                                                                                                                                                                                                                                                                                                                                                                                                                                                                                                                                                                                                                                                                                                                                                                                                                                                                                                                                                                                                                                                                                                                                                                                                                                                                                                                                                                                                                                                                                                                                                                                                                                                                                                                                                                                                                                                                                                                                                                                                                                                                                                                             |                                                                             |                                                                                                                |           |              |            |        |                                                            |   |   |                                    |    |    |                                                           |   |   |        |    |    |                                                      |   |   |                  |    |    |                                                                                                          |   |   |        |    |    |                                                      |   |   |                             |    |    |                                             |   |   |         |    |    |                                          |   |   |               |    |    |      |
| CURRENT/FORMER BOYFRIEND                                                                                                                                                                                                                                                                                                                                                                  | 1                                                                                                                                                                                               | 2                                                                                                                                                                                                                                                                                                                                                                                                                                                                                                                                                                                                                                                                                                                                                                                                                                                                                                                                                                                                                                                                                                                                                                                                                                                                                                                                                                                                                                                                                                                                                                                                                                                                                                                                                                                                                                                                                                                                                                                                                                                                                                                                                                                                                                                                                             |                                                                             |                                                                                                                |           |              |            |        |                                                            |   |   |                                    |    |    |                                                           |   |   |        |    |    |                                                      |   |   |                  |    |    |                                                                                                          |   |   |        |    |    |                                                      |   |   |                             |    |    |                                             |   |   |         |    |    |                                          |   |   |               |    |    |      |
| FRIEND                                                                                                                                                                                                                                                                                                                                                                                    | 1                                                                                                                                                                                               | 2                                                                                                                                                                                                                                                                                                                                                                                                                                                                                                                                                                                                                                                                                                                                                                                                                                                                                                                                                                                                                                                                                                                                                                                                                                                                                                                                                                                                                                                                                                                                                                                                                                                                                                                                                                                                                                                                                                                                                                                                                                                                                                                                                                                                                                                                                             |                                                                             |                                                                                                                |           |              |            |        |                                                            |   |   |                                    |    |    |                                                           |   |   |        |    |    |                                                      |   |   |                  |    |    |                                                                                                          |   |   |        |    |    |                                                      |   |   |                             |    |    |                                             |   |   |         |    |    |                                          |   |   |               |    |    |      |
| NEIGHBOR                                                                                                                                                                                                                                                                                                                                                                                  | 1                                                                                                                                                                                               | 2                                                                                                                                                                                                                                                                                                                                                                                                                                                                                                                                                                                                                                                                                                                                                                                                                                                                                                                                                                                                                                                                                                                                                                                                                                                                                                                                                                                                                                                                                                                                                                                                                                                                                                                                                                                                                                                                                                                                                                                                                                                                                                                                                                                                                                                                                             |                                                                             |                                                                                                                |           |              |            |        |                                                            |   |   |                                    |    |    |                                                           |   |   |        |    |    |                                                      |   |   |                  |    |    |                                                                                                          |   |   |        |    |    |                                                      |   |   |                             |    |    |                                             |   |   |         |    |    |                                          |   |   |               |    |    |      |
| RELIGIOUS LEADER                                                                                                                                                                                                                                                                                                                                                                          | 1                                                                                                                                                                                               | 2                                                                                                                                                                                                                                                                                                                                                                                                                                                                                                                                                                                                                                                                                                                                                                                                                                                                                                                                                                                                                                                                                                                                                                                                                                                                                                                                                                                                                                                                                                                                                                                                                                                                                                                                                                                                                                                                                                                                                                                                                                                                                                                                                                                                                                                                                             |                                                                             |                                                                                                                |           |              |            |        |                                                            |   |   |                                    |    |    |                                                           |   |   |        |    |    |                                                      |   |   |                  |    |    |                                                                                                          |   |   |        |    |    |                                                      |   |   |                             |    |    |                                             |   |   |         |    |    |                                          |   |   |               |    |    |      |
| DOCTOR/MEDICAL PERSONNEL                                                                                                                                                                                                                                                                                                                                                                  | 1                                                                                                                                                                                               | 2                                                                                                                                                                                                                                                                                                                                                                                                                                                                                                                                                                                                                                                                                                                                                                                                                                                                                                                                                                                                                                                                                                                                                                                                                                                                                                                                                                                                                                                                                                                                                                                                                                                                                                                                                                                                                                                                                                                                                                                                                                                                                                                                                                                                                                                                                             |                                                                             |                                                                                                                |           |              |            |        |                                                            |   |   |                                    |    |    |                                                           |   |   |        |    |    |                                                      |   |   |                  |    |    |                                                                                                          |   |   |        |    |    |                                                      |   |   |                             |    |    |                                             |   |   |         |    |    |                                          |   |   |               |    |    |      |
| POLICE                                                                                                                                                                                                                                                                                                                                                                                    | 1                                                                                                                                                                                               | 2                                                                                                                                                                                                                                                                                                                                                                                                                                                                                                                                                                                                                                                                                                                                                                                                                                                                                                                                                                                                                                                                                                                                                                                                                                                                                                                                                                                                                                                                                                                                                                                                                                                                                                                                                                                                                                                                                                                                                                                                                                                                                                                                                                                                                                                                                             |                                                                             |                                                                                                                |           |              |            |        |                                                            |   |   |                                    |    |    |                                                           |   |   |        |    |    |                                                      |   |   |                  |    |    |                                                                                                          |   |   |        |    |    |                                                      |   |   |                             |    |    |                                             |   |   |         |    |    |                                          |   |   |               |    |    |      |
| LAWYER                                                                                                                                                                                                                                                                                                                                                                                    | 1                                                                                                                                                                                               | 2                                                                                                                                                                                                                                                                                                                                                                                                                                                                                                                                                                                                                                                                                                                                                                                                                                                                                                                                                                                                                                                                                                                                                                                                                                                                                                                                                                                                                                                                                                                                                                                                                                                                                                                                                                                                                                                                                                                                                                                                                                                                                                                                                                                                                                                                                             |                                                                             |                                                                                                                |           |              |            |        |                                                            |   |   |                                    |    |    |                                                           |   |   |        |    |    |                                                      |   |   |                  |    |    |                                                                                                          |   |   |        |    |    |                                                      |   |   |                             |    |    |                                             |   |   |         |    |    |                                          |   |   |               |    |    |      |
| SOCIAL SERVICE ORGANIZATION                                                                                                                                                                                                                                                                                                                                                               | 1                                                                                                                                                                                               | 2                                                                                                                                                                                                                                                                                                                                                                                                                                                                                                                                                                                                                                                                                                                                                                                                                                                                                                                                                                                                                                                                                                                                                                                                                                                                                                                                                                                                                                                                                                                                                                                                                                                                                                                                                                                                                                                                                                                                                                                                                                                                                                                                                                                                                                                                                             |                                                                             |                                                                                                                |           |              |            |        |                                                            |   |   |                                    |    |    |                                                           |   |   |        |    |    |                                                      |   |   |                  |    |    |                                                                                                          |   |   |        |    |    |                                                      |   |   |                             |    |    |                                             |   |   |         |    |    |                                          |   |   |               |    |    |      |
| COMMUNITYLEADER/LOCAL ADMN L                                                                                                                                                                                                                                                                                                                                                              | 1                                                                                                                                                                                               | 2                                                                                                                                                                                                                                                                                                                                                                                                                                                                                                                                                                                                                                                                                                                                                                                                                                                                                                                                                                                                                                                                                                                                                                                                                                                                                                                                                                                                                                                                                                                                                                                                                                                                                                                                                                                                                                                                                                                                                                                                                                                                                                                                                                                                                                                                                             |                                                                             |                                                                                                                |           |              |            |        |                                                            |   |   |                                    |    |    |                                                           |   |   |        |    |    |                                                      |   |   |                  |    |    |                                                                                                          |   |   |        |    |    |                                                      |   |   |                             |    |    |                                             |   |   |         |    |    |                                          |   |   |               |    |    |      |
| TEACHER                                                                                                                                                                                                                                                                                                                                                                                   | 1                                                                                                                                                                                               | 2                                                                                                                                                                                                                                                                                                                                                                                                                                                                                                                                                                                                                                                                                                                                                                                                                                                                                                                                                                                                                                                                                                                                                                                                                                                                                                                                                                                                                                                                                                                                                                                                                                                                                                                                                                                                                                                                                                                                                                                                                                                                                                                                                                                                                                                                                             |                                                                             |                                                                                                                |           |              |            |        |                                                            |   |   |                                    |    |    |                                                           |   |   |        |    |    |                                                      |   |   |                  |    |    |                                                                                                          |   |   |        |    |    |                                                      |   |   |                             |    |    |                                             |   |   |         |    |    |                                          |   |   |               |    |    |      |
| OTHER                                                                                                                                                                                                                                                                                                                                                                                     | 1                                                                                                                                                                                               | 2                                                                                                                                                                                                                                                                                                                                                                                                                                                                                                                                                                                                                                                                                                                                                                                                                                                                                                                                                                                                                                                                                                                                                                                                                                                                                                                                                                                                                                                                                                                                                                                                                                                                                                                                                                                                                                                                                                                                                                                                                                                                                                                                                                                                                                                                                             |                                                                             |                                                                                                                |           |              |            |        |                                                            |   |   |                                    |    |    |                                                           |   |   |        |    |    |                                                      |   |   |                  |    |    |                                                                                                          |   |   |        |    |    |                                                      |   |   |                             |    |    |                                             |   |   |         |    |    |                                          |   |   |               |    |    |      |
| SPECIFY _____                                                                                                                                                                                                                                                                                                                                                                             |                                                                                                                                                                                                 |                                                                                                                                                                                                                                                                                                                                                                                                                                                                                                                                                                                                                                                                                                                                                                                                                                                                                                                                                                                                                                                                                                                                                                                                                                                                                                                                                                                                                                                                                                                                                                                                                                                                                                                                                                                                                                                                                                                                                                                                                                                                                                                                                                                                                                                                                               |                                                                             |                                                                                                                |           |              |            |        |                                                            |   |   |                                    |    |    |                                                           |   |   |        |    |    |                                                      |   |   |                  |    |    |                                                                                                          |   |   |        |    |    |                                                      |   |   |                             |    |    |                                             |   |   |         |    |    |                                          |   |   |               |    |    |      |
| 1211                                                                                                                                                                                                                                                                                                                                                                                      | Have you ever told any one else about this?                                                                                                                                                     | YES 1<br>NO 2                                                                                                                                                                                                                                                                                                                                                                                                                                                                                                                                                                                                                                                                                                                                                                                                                                                                                                                                                                                                                                                                                                                                                                                                                                                                                                                                                                                                                                                                                                                                                                                                                                                                                                                                                                                                                                                                                                                                                                                                                                                                                                                                                                                                                                                                                 | 1211                                                                        |                                                                                                                |           |              |            |        |                                                            |   |   |                                    |    |    |                                                           |   |   |        |    |    |                                                      |   |   |                  |    |    |                                                                                                          |   |   |        |    |    |                                                      |   |   |                             |    |    |                                             |   |   |         |    |    |                                          |   |   |               |    |    |      |
| 1212                                                                                                                                                                                                                                                                                                                                                                                      | As far as you know, did your father/guardian ever beat your mother/guardian?                                                                                                                    | YES 1<br>NO 2<br>DONT KNOW 88                                                                                                                                                                                                                                                                                                                                                                                                                                                                                                                                                                                                                                                                                                                                                                                                                                                                                                                                                                                                                                                                                                                                                                                                                                                                                                                                                                                                                                                                                                                                                                                                                                                                                                                                                                                                                                                                                                                                                                                                                                                                                                                                                                                                                                                                 | 1212                                                                        |                                                                                                                |           |              |            |        |                                                            |   |   |                                    |    |    |                                                           |   |   |        |    |    |                                                      |   |   |                  |    |    |                                                                                                          |   |   |        |    |    |                                                      |   |   |                             |    |    |                                             |   |   |         |    |    |                                          |   |   |               |    |    |      |
| <b>SECTION 13: Decision Making</b>                                                                                                                                                                                                                                                                                                                                                        |                                                                                                                                                                                                 |                                                                                                                                                                                                                                                                                                                                                                                                                                                                                                                                                                                                                                                                                                                                                                                                                                                                                                                                                                                                                                                                                                                                                                                                                                                                                                                                                                                                                                                                                                                                                                                                                                                                                                                                                                                                                                                                                                                                                                                                                                                                                                                                                                                                                                                                                               |                                                                             |                                                                                                                |           |              |            |        |                                                            |   |   |                                    |    |    |                                                           |   |   |        |    |    |                                                      |   |   |                  |    |    |                                                                                                          |   |   |        |    |    |                                                      |   |   |                             |    |    |                                             |   |   |         |    |    |                                          |   |   |               |    |    |      |
| 1301                                                                                                                                                                                                                                                                                                                                                                                      | How often are the following statements true for you?                                                                                                                                            | <table border="1" style="width:100%; border-collapse: collapse;"> <thead> <tr> <th></th> <th style="text-align: center;">Often</th> <th style="text-align: center;">Sometimes</th> <th style="text-align: center;">Never/Rarely</th> <th style="text-align: center;">Don't know</th> <th style="text-align: center;">Refuse</th> </tr> </thead> <tbody> <tr> <td>A. My parents or guardians ask for my opinion on things</td> <td style="text-align: center;">1</td> <td style="text-align: center;">2</td> <td style="text-align: center;">3</td> <td style="text-align: center;">88</td> <td style="text-align: center;">99</td> </tr> <tr> <td>B. My parents or guardians listen when I share my opinion</td> <td style="text-align: center;">1</td> <td style="text-align: center;">2</td> <td style="text-align: center;">3</td> <td style="text-align: center;">88</td> <td style="text-align: center;">99</td> </tr> <tr> <td>C. My friends ask my advice when they have a problem</td> <td style="text-align: center;">1</td> <td style="text-align: center;">2</td> <td style="text-align: center;">3</td> <td style="text-align: center;">88</td> <td style="text-align: center;">99</td> </tr> <tr> <td>D. If I see something wrong in school or the neighborhood I feel I can tell someone and they will listen</td> <td style="text-align: center;">1</td> <td style="text-align: center;">2</td> <td style="text-align: center;">3</td> <td style="text-align: center;">88</td> <td style="text-align: center;">99</td> </tr> <tr> <td>E. I can speak up when I see someone else being hurt</td> <td style="text-align: center;">1</td> <td style="text-align: center;">2</td> <td style="text-align: center;">3</td> <td style="text-align: center;">88</td> <td style="text-align: center;">99</td> </tr> <tr> <td>F. I can ask adults for help when I need it</td> <td style="text-align: center;">1</td> <td style="text-align: center;">2</td> <td style="text-align: center;">3</td> <td style="text-align: center;">88</td> <td style="text-align: center;">99</td> </tr> </tbody> </table>                                                                                                                                                                              |                                                                             | Often                                                                                                          | Sometimes | Never/Rarely | Don't know | Refuse | A. My parents or guardians ask for my opinion on things    | 1 | 2 | 3                                  | 88 | 99 | B. My parents or guardians listen when I share my opinion | 1 | 2 | 3      | 88 | 99 | C. My friends ask my advice when they have a problem | 1 | 2 | 3                | 88 | 99 | D. If I see something wrong in school or the neighborhood I feel I can tell someone and they will listen | 1 | 2 | 3      | 88 | 99 | E. I can speak up when I see someone else being hurt | 1 | 2 | 3                           | 88 | 99 | F. I can ask adults for help when I need it | 1 | 2 | 3       | 88 | 99 | 1301                                     |   |   |               |    |    |      |
|                                                                                                                                                                                                                                                                                                                                                                                           | Often                                                                                                                                                                                           | Sometimes                                                                                                                                                                                                                                                                                                                                                                                                                                                                                                                                                                                                                                                                                                                                                                                                                                                                                                                                                                                                                                                                                                                                                                                                                                                                                                                                                                                                                                                                                                                                                                                                                                                                                                                                                                                                                                                                                                                                                                                                                                                                                                                                                                                                                                                                                     | Never/Rarely                                                                | Don't know                                                                                                     | Refuse    |              |            |        |                                                            |   |   |                                    |    |    |                                                           |   |   |        |    |    |                                                      |   |   |                  |    |    |                                                                                                          |   |   |        |    |    |                                                      |   |   |                             |    |    |                                             |   |   |         |    |    |                                          |   |   |               |    |    |      |
| A. My parents or guardians ask for my opinion on things                                                                                                                                                                                                                                                                                                                                   | 1                                                                                                                                                                                               | 2                                                                                                                                                                                                                                                                                                                                                                                                                                                                                                                                                                                                                                                                                                                                                                                                                                                                                                                                                                                                                                                                                                                                                                                                                                                                                                                                                                                                                                                                                                                                                                                                                                                                                                                                                                                                                                                                                                                                                                                                                                                                                                                                                                                                                                                                                             | 3                                                                           | 88                                                                                                             | 99        |              |            |        |                                                            |   |   |                                    |    |    |                                                           |   |   |        |    |    |                                                      |   |   |                  |    |    |                                                                                                          |   |   |        |    |    |                                                      |   |   |                             |    |    |                                             |   |   |         |    |    |                                          |   |   |               |    |    |      |
| B. My parents or guardians listen when I share my opinion                                                                                                                                                                                                                                                                                                                                 | 1                                                                                                                                                                                               | 2                                                                                                                                                                                                                                                                                                                                                                                                                                                                                                                                                                                                                                                                                                                                                                                                                                                                                                                                                                                                                                                                                                                                                                                                                                                                                                                                                                                                                                                                                                                                                                                                                                                                                                                                                                                                                                                                                                                                                                                                                                                                                                                                                                                                                                                                                             | 3                                                                           | 88                                                                                                             | 99        |              |            |        |                                                            |   |   |                                    |    |    |                                                           |   |   |        |    |    |                                                      |   |   |                  |    |    |                                                                                                          |   |   |        |    |    |                                                      |   |   |                             |    |    |                                             |   |   |         |    |    |                                          |   |   |               |    |    |      |
| C. My friends ask my advice when they have a problem                                                                                                                                                                                                                                                                                                                                      | 1                                                                                                                                                                                               | 2                                                                                                                                                                                                                                                                                                                                                                                                                                                                                                                                                                                                                                                                                                                                                                                                                                                                                                                                                                                                                                                                                                                                                                                                                                                                                                                                                                                                                                                                                                                                                                                                                                                                                                                                                                                                                                                                                                                                                                                                                                                                                                                                                                                                                                                                                             | 3                                                                           | 88                                                                                                             | 99        |              |            |        |                                                            |   |   |                                    |    |    |                                                           |   |   |        |    |    |                                                      |   |   |                  |    |    |                                                                                                          |   |   |        |    |    |                                                      |   |   |                             |    |    |                                             |   |   |         |    |    |                                          |   |   |               |    |    |      |
| D. If I see something wrong in school or the neighborhood I feel I can tell someone and they will listen                                                                                                                                                                                                                                                                                  | 1                                                                                                                                                                                               | 2                                                                                                                                                                                                                                                                                                                                                                                                                                                                                                                                                                                                                                                                                                                                                                                                                                                                                                                                                                                                                                                                                                                                                                                                                                                                                                                                                                                                                                                                                                                                                                                                                                                                                                                                                                                                                                                                                                                                                                                                                                                                                                                                                                                                                                                                                             | 3                                                                           | 88                                                                                                             | 99        |              |            |        |                                                            |   |   |                                    |    |    |                                                           |   |   |        |    |    |                                                      |   |   |                  |    |    |                                                                                                          |   |   |        |    |    |                                                      |   |   |                             |    |    |                                             |   |   |         |    |    |                                          |   |   |               |    |    |      |
| E. I can speak up when I see someone else being hurt                                                                                                                                                                                                                                                                                                                                      | 1                                                                                                                                                                                               | 2                                                                                                                                                                                                                                                                                                                                                                                                                                                                                                                                                                                                                                                                                                                                                                                                                                                                                                                                                                                                                                                                                                                                                                                                                                                                                                                                                                                                                                                                                                                                                                                                                                                                                                                                                                                                                                                                                                                                                                                                                                                                                                                                                                                                                                                                                             | 3                                                                           | 88                                                                                                             | 99        |              |            |        |                                                            |   |   |                                    |    |    |                                                           |   |   |        |    |    |                                                      |   |   |                  |    |    |                                                                                                          |   |   |        |    |    |                                                      |   |   |                             |    |    |                                             |   |   |         |    |    |                                          |   |   |               |    |    |      |
| F. I can ask adults for help when I need it                                                                                                                                                                                                                                                                                                                                               | 1                                                                                                                                                                                               | 2                                                                                                                                                                                                                                                                                                                                                                                                                                                                                                                                                                                                                                                                                                                                                                                                                                                                                                                                                                                                                                                                                                                                                                                                                                                                                                                                                                                                                                                                                                                                                                                                                                                                                                                                                                                                                                                                                                                                                                                                                                                                                                                                                                                                                                                                                             | 3                                                                           | 88                                                                                                             | 99        |              |            |        |                                                            |   |   |                                    |    |    |                                                           |   |   |        |    |    |                                                      |   |   |                  |    |    |                                                                                                          |   |   |        |    |    |                                                      |   |   |                             |    |    |                                             |   |   |         |    |    |                                          |   |   |               |    |    |      |
| 1302                                                                                                                                                                                                                                                                                                                                                                                      | How often are you able to make each of the following decisions on your own, without an adult?                                                                                                   | <table border="1" style="width:100%; border-collapse: collapse;"> <thead> <tr> <th></th> <th style="text-align: center;">Often</th> <th style="text-align: center;">Sometimes</th> <th style="text-align: center;">Never/Rarely</th> <th style="text-align: center;">Don't know</th> <th style="text-align: center;">Refuse</th> </tr> </thead> <tbody> <tr> <td>A. What clothes to wear when you are not in school/working</td> <td style="text-align: center;">1</td> <td style="text-align: center;">2</td> <td style="text-align: center;">3</td> <td style="text-align: center;">88</td> <td style="text-align: center;">99</td> </tr> <tr> <td>B. What to do in your free time</td> <td style="text-align: center;">1</td> <td style="text-align: center;">2</td> <td style="text-align: center;">3</td> <td style="text-align: center;">88</td> <td style="text-align: center;">99</td> </tr> <tr> <td>C. What to eat when you are not at home</td> <td style="text-align: center;">1</td> <td style="text-align: center;">2</td> <td style="text-align: center;">3</td> <td style="text-align: center;">88</td> <td style="text-align: center;">99</td> </tr> <tr> <td>D. How much education you will get (e.g. Complete secondary school, Go to university)</td> <td style="text-align: center;">1</td> <td style="text-align: center;">2</td> <td style="text-align: center;">3</td> <td style="text-align: center;">88</td> <td style="text-align: center;">99</td> </tr> <tr> <td>E. Who you can have as friends</td> <td style="text-align: center;">1</td> <td style="text-align: center;">2</td> <td style="text-align: center;">3</td> <td style="text-align: center;">88</td> <td style="text-align: center;">99</td> </tr> <tr> <td>F. Decide when to marry on your own</td> <td style="text-align: center;">1</td> <td style="text-align: center;">2</td> <td style="text-align: center;">3</td> <td style="text-align: center;">88</td> <td style="text-align: center;">99</td> </tr> <tr> <td>G. Decide who you will marry on your own</td> <td style="text-align: center;">1</td> <td style="text-align: center;">2</td> <td style="text-align: center;">3</td> <td style="text-align: center;">88</td> <td style="text-align: center;">99</td> </tr> </tbody> </table> |                                                                             | Often                                                                                                          | Sometimes | Never/Rarely | Don't know | Refuse | A. What clothes to wear when you are not in school/working | 1 | 2 | 3                                  | 88 | 99 | B. What to do in your free time                           | 1 | 2 | 3      | 88 | 99 | C. What to eat when you are not at home              | 1 | 2 | 3                | 88 | 99 | D. How much education you will get (e.g. Complete secondary school, Go to university)                    | 1 | 2 | 3      | 88 | 99 | E. Who you can have as friends                       | 1 | 2 | 3                           | 88 | 99 | F. Decide when to marry on your own         | 1 | 2 | 3       | 88 | 99 | G. Decide who you will marry on your own | 1 | 2 | 3             | 88 | 99 | 1302 |
|                                                                                                                                                                                                                                                                                                                                                                                           | Often                                                                                                                                                                                           | Sometimes                                                                                                                                                                                                                                                                                                                                                                                                                                                                                                                                                                                                                                                                                                                                                                                                                                                                                                                                                                                                                                                                                                                                                                                                                                                                                                                                                                                                                                                                                                                                                                                                                                                                                                                                                                                                                                                                                                                                                                                                                                                                                                                                                                                                                                                                                     | Never/Rarely                                                                | Don't know                                                                                                     | Refuse    |              |            |        |                                                            |   |   |                                    |    |    |                                                           |   |   |        |    |    |                                                      |   |   |                  |    |    |                                                                                                          |   |   |        |    |    |                                                      |   |   |                             |    |    |                                             |   |   |         |    |    |                                          |   |   |               |    |    |      |
| A. What clothes to wear when you are not in school/working                                                                                                                                                                                                                                                                                                                                | 1                                                                                                                                                                                               | 2                                                                                                                                                                                                                                                                                                                                                                                                                                                                                                                                                                                                                                                                                                                                                                                                                                                                                                                                                                                                                                                                                                                                                                                                                                                                                                                                                                                                                                                                                                                                                                                                                                                                                                                                                                                                                                                                                                                                                                                                                                                                                                                                                                                                                                                                                             | 3                                                                           | 88                                                                                                             | 99        |              |            |        |                                                            |   |   |                                    |    |    |                                                           |   |   |        |    |    |                                                      |   |   |                  |    |    |                                                                                                          |   |   |        |    |    |                                                      |   |   |                             |    |    |                                             |   |   |         |    |    |                                          |   |   |               |    |    |      |
| B. What to do in your free time                                                                                                                                                                                                                                                                                                                                                           | 1                                                                                                                                                                                               | 2                                                                                                                                                                                                                                                                                                                                                                                                                                                                                                                                                                                                                                                                                                                                                                                                                                                                                                                                                                                                                                                                                                                                                                                                                                                                                                                                                                                                                                                                                                                                                                                                                                                                                                                                                                                                                                                                                                                                                                                                                                                                                                                                                                                                                                                                                             | 3                                                                           | 88                                                                                                             | 99        |              |            |        |                                                            |   |   |                                    |    |    |                                                           |   |   |        |    |    |                                                      |   |   |                  |    |    |                                                                                                          |   |   |        |    |    |                                                      |   |   |                             |    |    |                                             |   |   |         |    |    |                                          |   |   |               |    |    |      |
| C. What to eat when you are not at home                                                                                                                                                                                                                                                                                                                                                   | 1                                                                                                                                                                                               | 2                                                                                                                                                                                                                                                                                                                                                                                                                                                                                                                                                                                                                                                                                                                                                                                                                                                                                                                                                                                                                                                                                                                                                                                                                                                                                                                                                                                                                                                                                                                                                                                                                                                                                                                                                                                                                                                                                                                                                                                                                                                                                                                                                                                                                                                                                             | 3                                                                           | 88                                                                                                             | 99        |              |            |        |                                                            |   |   |                                    |    |    |                                                           |   |   |        |    |    |                                                      |   |   |                  |    |    |                                                                                                          |   |   |        |    |    |                                                      |   |   |                             |    |    |                                             |   |   |         |    |    |                                          |   |   |               |    |    |      |
| D. How much education you will get (e.g. Complete secondary school, Go to university)                                                                                                                                                                                                                                                                                                     | 1                                                                                                                                                                                               | 2                                                                                                                                                                                                                                                                                                                                                                                                                                                                                                                                                                                                                                                                                                                                                                                                                                                                                                                                                                                                                                                                                                                                                                                                                                                                                                                                                                                                                                                                                                                                                                                                                                                                                                                                                                                                                                                                                                                                                                                                                                                                                                                                                                                                                                                                                             | 3                                                                           | 88                                                                                                             | 99        |              |            |        |                                                            |   |   |                                    |    |    |                                                           |   |   |        |    |    |                                                      |   |   |                  |    |    |                                                                                                          |   |   |        |    |    |                                                      |   |   |                             |    |    |                                             |   |   |         |    |    |                                          |   |   |               |    |    |      |
| E. Who you can have as friends                                                                                                                                                                                                                                                                                                                                                            | 1                                                                                                                                                                                               | 2                                                                                                                                                                                                                                                                                                                                                                                                                                                                                                                                                                                                                                                                                                                                                                                                                                                                                                                                                                                                                                                                                                                                                                                                                                                                                                                                                                                                                                                                                                                                                                                                                                                                                                                                                                                                                                                                                                                                                                                                                                                                                                                                                                                                                                                                                             | 3                                                                           | 88                                                                                                             | 99        |              |            |        |                                                            |   |   |                                    |    |    |                                                           |   |   |        |    |    |                                                      |   |   |                  |    |    |                                                                                                          |   |   |        |    |    |                                                      |   |   |                             |    |    |                                             |   |   |         |    |    |                                          |   |   |               |    |    |      |
| F. Decide when to marry on your own                                                                                                                                                                                                                                                                                                                                                       | 1                                                                                                                                                                                               | 2                                                                                                                                                                                                                                                                                                                                                                                                                                                                                                                                                                                                                                                                                                                                                                                                                                                                                                                                                                                                                                                                                                                                                                                                                                                                                                                                                                                                                                                                                                                                                                                                                                                                                                                                                                                                                                                                                                                                                                                                                                                                                                                                                                                                                                                                                             | 3                                                                           | 88                                                                                                             | 99        |              |            |        |                                                            |   |   |                                    |    |    |                                                           |   |   |        |    |    |                                                      |   |   |                  |    |    |                                                                                                          |   |   |        |    |    |                                                      |   |   |                             |    |    |                                             |   |   |         |    |    |                                          |   |   |               |    |    |      |
| G. Decide who you will marry on your own                                                                                                                                                                                                                                                                                                                                                  | 1                                                                                                                                                                                               | 2                                                                                                                                                                                                                                                                                                                                                                                                                                                                                                                                                                                                                                                                                                                                                                                                                                                                                                                                                                                                                                                                                                                                                                                                                                                                                                                                                                                                                                                                                                                                                                                                                                                                                                                                                                                                                                                                                                                                                                                                                                                                                                                                                                                                                                                                                             | 3                                                                           | 88                                                                                                             | 99        |              |            |        |                                                            |   |   |                                    |    |    |                                                           |   |   |        |    |    |                                                      |   |   |                  |    |    |                                                                                                          |   |   |        |    |    |                                                      |   |   |                             |    |    |                                             |   |   |         |    |    |                                          |   |   |               |    |    |      |
| 1303                                                                                                                                                                                                                                                                                                                                                                                      | Do you think you will be able to decide on your own when to marry?<br><br>IF MARRIED, ASK: Were you able to decide on your own when to marry?                                                   | YES 1<br>NO 2<br>DONT KNOW 88                                                                                                                                                                                                                                                                                                                                                                                                                                                                                                                                                                                                                                                                                                                                                                                                                                                                                                                                                                                                                                                                                                                                                                                                                                                                                                                                                                                                                                                                                                                                                                                                                                                                                                                                                                                                                                                                                                                                                                                                                                                                                                                                                                                                                                                                 | 1303                                                                        |                                                                                                                |           |              |            |        |                                                            |   |   |                                    |    |    |                                                           |   |   |        |    |    |                                                      |   |   |                  |    |    |                                                                                                          |   |   |        |    |    |                                                      |   |   |                             |    |    |                                             |   |   |         |    |    |                                          |   |   |               |    |    |      |
| 1304                                                                                                                                                                                                                                                                                                                                                                                      | Do you think you will be able to decide who you will marry on your own?<br><br>IF MARRIED, ASK: Were you able to decide who you would marry? On your own?                                       | YES 1<br>NO 2<br>DONT KNOW 88                                                                                                                                                                                                                                                                                                                                                                                                                                                                                                                                                                                                                                                                                                                                                                                                                                                                                                                                                                                                                                                                                                                                                                                                                                                                                                                                                                                                                                                                                                                                                                                                                                                                                                                                                                                                                                                                                                                                                                                                                                                                                                                                                                                                                                                                 | 1304                                                                        |                                                                                                                |           |              |            |        |                                                            |   |   |                                    |    |    |                                                           |   |   |        |    |    |                                                      |   |   |                  |    |    |                                                                                                          |   |   |        |    |    |                                                      |   |   |                             |    |    |                                             |   |   |         |    |    |                                          |   |   |               |    |    |      |
| <p><b>END CAPI:</b> If you would like to discuss any of the questions or issues raised in this survey, please feel free to discuss this with the interviewer. The interviewer can provide information to contact a social welfare officer to discuss your concerns, or can contact the social welfare officer for you. Thank you very much for participating in this important study.</p> |                                                                                                                                                                                                 |                                                                                                                                                                                                                                                                                                                                                                                                                                                                                                                                                                                                                                                                                                                                                                                                                                                                                                                                                                                                                                                                                                                                                                                                                                                                                                                                                                                                                                                                                                                                                                                                                                                                                                                                                                                                                                                                                                                                                                                                                                                                                                                                                                                                                                                                                               |                                                                             |                                                                                                                |           |              |            |        |                                                            |   |   |                                    |    |    |                                                           |   |   |        |    |    |                                                      |   |   |                  |    |    |                                                                                                          |   |   |        |    |    |                                                      |   |   |                             |    |    |                                             |   |   |         |    |    |                                          |   |   |               |    |    |      |

SWAHILI

SECTION 1: RESPONDENT'S BACKGROUND

| QUESTIONS                                                                                                                                     | RESPONSES                                                                                                                                                                                                                                                                                                                                                                                                                                                                                                                                                                                                                                                                                                                                                                                                                                                                                                                                                                                                                                                                                                                                                                                                                                                                                                                                                                                                                                      | SKIP TO                   |     |    |                 |   |   |                       |   |   |                           |   |   |                                                  |   |   |                         |   |   |                                                                   |   |   |                |   |   |                            |   |   |                                            |   |   |                                       |   |   |                                        |   |   |                         |   |   |                         |   |   |                                              |   |   |                                                      |   |   |                    |   |   |                                                     |   |   |                  |  |    |  |
|-----------------------------------------------------------------------------------------------------------------------------------------------|------------------------------------------------------------------------------------------------------------------------------------------------------------------------------------------------------------------------------------------------------------------------------------------------------------------------------------------------------------------------------------------------------------------------------------------------------------------------------------------------------------------------------------------------------------------------------------------------------------------------------------------------------------------------------------------------------------------------------------------------------------------------------------------------------------------------------------------------------------------------------------------------------------------------------------------------------------------------------------------------------------------------------------------------------------------------------------------------------------------------------------------------------------------------------------------------------------------------------------------------------------------------------------------------------------------------------------------------------------------------------------------------------------------------------------------------|---------------------------|-----|----|-----------------|---|---|-----------------------|---|---|---------------------------|---|---|--------------------------------------------------|---|---|-------------------------|---|---|-------------------------------------------------------------------|---|---|----------------|---|---|----------------------------|---|---|--------------------------------------------|---|---|---------------------------------------|---|---|----------------------------------------|---|---|-------------------------|---|---|-------------------------|---|---|----------------------------------------------|---|---|------------------------------------------------------|---|---|--------------------|---|---|-----------------------------------------------------|---|---|------------------|--|----|--|
| [RECORD THE TIME INTERVIEW BEGINS<br>USE 24 HOUR TIME]                                                                                        | a. HOUR [6-20]<br>b. MINUTES [0-59]                                                                                                                                                                                                                                                                                                                                                                                                                                                                                                                                                                                                                                                                                                                                                                                                                                                                                                                                                                                                                                                                                                                                                                                                                                                                                                                                                                                                            |                           |     |    |                 |   |   |                       |   |   |                           |   |   |                                                  |   |   |                         |   |   |                                                                   |   |   |                |   |   |                            |   |   |                                            |   |   |                                       |   |   |                                        |   |   |                         |   |   |                         |   |   |                                              |   |   |                                                      |   |   |                    |   |   |                                                     |   |   |                  |  |    |  |
| Je, ulizaliwa katika mwezi na mwaka gani?                                                                                                     | a. MONTH [1-12]<br>DON'T KNOW MONTH 88<br>b. YEAR [1996-2007]<br>DON'T KNOW YEAR 8888                                                                                                                                                                                                                                                                                                                                                                                                                                                                                                                                                                                                                                                                                                                                                                                                                                                                                                                                                                                                                                                                                                                                                                                                                                                                                                                                                          |                           |     |    |                 |   |   |                       |   |   |                           |   |   |                                                  |   |   |                         |   |   |                                                                   |   |   |                |   |   |                            |   |   |                                            |   |   |                                       |   |   |                                        |   |   |                         |   |   |                         |   |   |                                              |   |   |                                                      |   |   |                    |   |   |                                                     |   |   |                  |  |    |  |
| Ulikuwa na umri wa miaka mingapi katika adhimisho la mwisho la siku yako ya kuzaliwa?<br>[COMPARE AND CORRECT 102 AND/OR 103 IF INCONSISTENT] | AGE IN COMPLETED YEARS [10-20]                                                                                                                                                                                                                                                                                                                                                                                                                                                                                                                                                                                                                                                                                                                                                                                                                                                                                                                                                                                                                                                                                                                                                                                                                                                                                                                                                                                                                 |                           |     |    |                 |   |   |                       |   |   |                           |   |   |                                                  |   |   |                         |   |   |                                                                   |   |   |                |   |   |                            |   |   |                                            |   |   |                                       |   |   |                                        |   |   |                         |   |   |                         |   |   |                                              |   |   |                                                      |   |   |                    |   |   |                                                     |   |   |                  |  |    |  |
| Uko darasa la ngapi kwa sasa?                                                                                                                 | STANDARD [1-8]                                                                                                                                                                                                                                                                                                                                                                                                                                                                                                                                                                                                                                                                                                                                                                                                                                                                                                                                                                                                                                                                                                                                                                                                                                                                                                                                                                                                                                 |                           |     |    |                 |   |   |                       |   |   |                           |   |   |                                                  |   |   |                         |   |   |                                                                   |   |   |                |   |   |                            |   |   |                                            |   |   |                                       |   |   |                                        |   |   |                         |   |   |                         |   |   |                                              |   |   |                                                      |   |   |                    |   |   |                                                     |   |   |                  |  |    |  |
| Ulizaliwa katika jimbo gani?                                                                                                                  | COUNTY CODE [01-49]<br>BORN IN SOMALIA 66<br>BORN IN ETHIOPIA 77<br>DON'T KNOW 88<br>BORN IN OTHER COUNTRY 98<br>SPECIFY _____                                                                                                                                                                                                                                                                                                                                                                                                                                                                                                                                                                                                                                                                                                                                                                                                                                                                                                                                                                                                                                                                                                                                                                                                                                                                                                                 | IF NOT CLASS 7<br>END INT |     |    |                 |   |   |                       |   |   |                           |   |   |                                                  |   |   |                         |   |   |                                                                   |   |   |                |   |   |                            |   |   |                                            |   |   |                                       |   |   |                                        |   |   |                         |   |   |                         |   |   |                                              |   |   |                                                      |   |   |                    |   |   |                                                     |   |   |                  |  |    |  |
| Mahali unapoishi sasa panaitwaje?<br><br>Note: Pre-populated list                                                                             | _____                                                                                                                                                                                                                                                                                                                                                                                                                                                                                                                                                                                                                                                                                                                                                                                                                                                                                                                                                                                                                                                                                                                                                                                                                                                                                                                                                                                                                                          |                           |     |    |                 |   |   |                       |   |   |                           |   |   |                                                  |   |   |                         |   |   |                                                                   |   |   |                |   |   |                            |   |   |                                            |   |   |                                       |   |   |                                        |   |   |                         |   |   |                         |   |   |                                              |   |   |                                                      |   |   |                    |   |   |                                                     |   |   |                  |  |    |  |
| Kwa mfululizo umekua ukiishi [name of current place of residence] kwa muda gani?<br>[IF LESS THAN ONE YEAR, RECORD '0' YEARS]                 | YEARS [0-20]<br>ALWAYS (SINCE BIRTH) 77<br>DON'T KNOW 88                                                                                                                                                                                                                                                                                                                                                                                                                                                                                                                                                                                                                                                                                                                                                                                                                                                                                                                                                                                                                                                                                                                                                                                                                                                                                                                                                                                       | 109                       |     |    |                 |   |   |                       |   |   |                           |   |   |                                                  |   |   |                         |   |   |                                                                   |   |   |                |   |   |                            |   |   |                                            |   |   |                                       |   |   |                                        |   |   |                         |   |   |                         |   |   |                                              |   |   |                                                      |   |   |                    |   |   |                                                     |   |   |                  |  |    |  |
| Ukifikiria mahali ulipokua ukiishi kabla ya kuhamia hapa, ilikuwa mji, jiji au kijiji?                                                        | TOWN / URBAN AREA 1<br>VILLAGE / RURAL AREA 2                                                                                                                                                                                                                                                                                                                                                                                                                                                                                                                                                                                                                                                                                                                                                                                                                                                                                                                                                                                                                                                                                                                                                                                                                                                                                                                                                                                                  |                           |     |    |                 |   |   |                       |   |   |                           |   |   |                                                  |   |   |                         |   |   |                                                                   |   |   |                |   |   |                            |   |   |                                            |   |   |                                       |   |   |                                        |   |   |                         |   |   |                         |   |   |                                              |   |   |                                                      |   |   |                    |   |   |                                                     |   |   |                  |  |    |  |
| Katika mwaka mmoja uliopita, umesafiri na kulala mbali na nyumbani kwako mara ngapi tofauti tofauti?                                          | NUMBER OF TRIPS [1-80]<br>NONE 0<br>DON'T KNOW 88                                                                                                                                                                                                                                                                                                                                                                                                                                                                                                                                                                                                                                                                                                                                                                                                                                                                                                                                                                                                                                                                                                                                                                                                                                                                                                                                                                                              | 110                       |     |    |                 |   |   |                       |   |   |                           |   |   |                                                  |   |   |                         |   |   |                                                                   |   |   |                |   |   |                            |   |   |                                            |   |   |                                       |   |   |                                        |   |   |                         |   |   |                         |   |   |                                              |   |   |                                                      |   |   |                    |   |   |                                                     |   |   |                  |  |    |  |
| a. Katika muhula wa shule uliopita (kati ya Septemba na Oktoba mwaka jana), ulikuwa mbali na nyumbani kwenu kwa jumla ya siku ngapi?          | NUMBER OF DAYS [1-70]<br>NONE                                                                                                                                                                                                                                                                                                                                                                                                                                                                                                                                                                                                                                                                                                                                                                                                                                                                                                                                                                                                                                                                                                                                                                                                                                                                                                                                                                                                                  | 110                       |     |    |                 |   |   |                       |   |   |                           |   |   |                                                  |   |   |                         |   |   |                                                                   |   |   |                |   |   |                            |   |   |                                            |   |   |                                       |   |   |                                        |   |   |                         |   |   |                         |   |   |                                              |   |   |                                                      |   |   |                    |   |   |                                                     |   |   |                  |  |    |  |
| b. Ni sababu zipi zilizokufanya uwe mbali kwa siku ulizotaja?<br><br>[READ ALL OPTIONS]                                                       | <table border="0"> <thead> <tr> <th></th> <th>YES</th> <th>NO</th> </tr> </thead> <tbody> <tr><td>a. Kufunga ndoa</td><td>1</td><td>2</td></tr> <tr><td>b. Kwa ajili ya shule</td><td>1</td><td>2</td></tr> <tr><td>c. Kwa sababu ya matibabu</td><td>1</td><td>2</td></tr> <tr><td>d. Singeweza kujimudu kimaisha mahali nilipokuwa</td><td>1</td><td>2</td></tr> <tr><td>e. Kuandmana na familia</td><td>1</td><td>2</td></tr> <tr><td>f. Matatizo ya kibnafsi nyumbani (mgogoro wa familia, unyanyapaa)</td><td>1</td><td>2</td></tr> <tr><td>g. Kuenda kazi</td><td>1</td><td>2</td></tr> <tr><td>h. Kutoroka ndoa za mapema</td><td>1</td><td>2</td></tr> <tr><td>i. Kutengana au kutalakiana na mume/mwenzi</td><td>1</td><td>2</td></tr> <tr><td>j. Kifo cha mzazi au cha wazazi/mlezi</td><td>1</td><td>2</td></tr> <tr><td>k. Kutengana au kutalakiana kwa wazazi</td><td>1</td><td>2</td></tr> <tr><td>l. Kifo cha mume/mwenzi</td><td>1</td><td>2</td></tr> <tr><td>m. Machafuko ya kisiasa</td><td>1</td><td>2</td></tr> <tr><td>n. Ukame au umasikini katika maeneo uliotoka</td><td>1</td><td>2</td></tr> <tr><td>o. Fedheha (unyanyapaa) kwa sababu ya hali ya ukimwi</td><td>1</td><td>2</td></tr> <tr><td>p. Ukosefu wa karo</td><td>1</td><td>2</td></tr> <tr><td>q. Aina nyinginezo za fedheha (unyanyapaa) /ubaguzi</td><td>1</td><td>2</td></tr> <tr><td>r. Nyingine taja</td><td></td><td>98</td></tr> </tbody> </table> |                           | YES | NO | a. Kufunga ndoa | 1 | 2 | b. Kwa ajili ya shule | 1 | 2 | c. Kwa sababu ya matibabu | 1 | 2 | d. Singeweza kujimudu kimaisha mahali nilipokuwa | 1 | 2 | e. Kuandmana na familia | 1 | 2 | f. Matatizo ya kibnafsi nyumbani (mgogoro wa familia, unyanyapaa) | 1 | 2 | g. Kuenda kazi | 1 | 2 | h. Kutoroka ndoa za mapema | 1 | 2 | i. Kutengana au kutalakiana na mume/mwenzi | 1 | 2 | j. Kifo cha mzazi au cha wazazi/mlezi | 1 | 2 | k. Kutengana au kutalakiana kwa wazazi | 1 | 2 | l. Kifo cha mume/mwenzi | 1 | 2 | m. Machafuko ya kisiasa | 1 | 2 | n. Ukame au umasikini katika maeneo uliotoka | 1 | 2 | o. Fedheha (unyanyapaa) kwa sababu ya hali ya ukimwi | 1 | 2 | p. Ukosefu wa karo | 1 | 2 | q. Aina nyinginezo za fedheha (unyanyapaa) /ubaguzi | 1 | 2 | r. Nyingine taja |  | 98 |  |
|                                                                                                                                               | YES                                                                                                                                                                                                                                                                                                                                                                                                                                                                                                                                                                                                                                                                                                                                                                                                                                                                                                                                                                                                                                                                                                                                                                                                                                                                                                                                                                                                                                            | NO                        |     |    |                 |   |   |                       |   |   |                           |   |   |                                                  |   |   |                         |   |   |                                                                   |   |   |                |   |   |                            |   |   |                                            |   |   |                                       |   |   |                                        |   |   |                         |   |   |                         |   |   |                                              |   |   |                                                      |   |   |                    |   |   |                                                     |   |   |                  |  |    |  |
| a. Kufunga ndoa                                                                                                                               | 1                                                                                                                                                                                                                                                                                                                                                                                                                                                                                                                                                                                                                                                                                                                                                                                                                                                                                                                                                                                                                                                                                                                                                                                                                                                                                                                                                                                                                                              | 2                         |     |    |                 |   |   |                       |   |   |                           |   |   |                                                  |   |   |                         |   |   |                                                                   |   |   |                |   |   |                            |   |   |                                            |   |   |                                       |   |   |                                        |   |   |                         |   |   |                         |   |   |                                              |   |   |                                                      |   |   |                    |   |   |                                                     |   |   |                  |  |    |  |
| b. Kwa ajili ya shule                                                                                                                         | 1                                                                                                                                                                                                                                                                                                                                                                                                                                                                                                                                                                                                                                                                                                                                                                                                                                                                                                                                                                                                                                                                                                                                                                                                                                                                                                                                                                                                                                              | 2                         |     |    |                 |   |   |                       |   |   |                           |   |   |                                                  |   |   |                         |   |   |                                                                   |   |   |                |   |   |                            |   |   |                                            |   |   |                                       |   |   |                                        |   |   |                         |   |   |                         |   |   |                                              |   |   |                                                      |   |   |                    |   |   |                                                     |   |   |                  |  |    |  |
| c. Kwa sababu ya matibabu                                                                                                                     | 1                                                                                                                                                                                                                                                                                                                                                                                                                                                                                                                                                                                                                                                                                                                                                                                                                                                                                                                                                                                                                                                                                                                                                                                                                                                                                                                                                                                                                                              | 2                         |     |    |                 |   |   |                       |   |   |                           |   |   |                                                  |   |   |                         |   |   |                                                                   |   |   |                |   |   |                            |   |   |                                            |   |   |                                       |   |   |                                        |   |   |                         |   |   |                         |   |   |                                              |   |   |                                                      |   |   |                    |   |   |                                                     |   |   |                  |  |    |  |
| d. Singeweza kujimudu kimaisha mahali nilipokuwa                                                                                              | 1                                                                                                                                                                                                                                                                                                                                                                                                                                                                                                                                                                                                                                                                                                                                                                                                                                                                                                                                                                                                                                                                                                                                                                                                                                                                                                                                                                                                                                              | 2                         |     |    |                 |   |   |                       |   |   |                           |   |   |                                                  |   |   |                         |   |   |                                                                   |   |   |                |   |   |                            |   |   |                                            |   |   |                                       |   |   |                                        |   |   |                         |   |   |                         |   |   |                                              |   |   |                                                      |   |   |                    |   |   |                                                     |   |   |                  |  |    |  |
| e. Kuandmana na familia                                                                                                                       | 1                                                                                                                                                                                                                                                                                                                                                                                                                                                                                                                                                                                                                                                                                                                                                                                                                                                                                                                                                                                                                                                                                                                                                                                                                                                                                                                                                                                                                                              | 2                         |     |    |                 |   |   |                       |   |   |                           |   |   |                                                  |   |   |                         |   |   |                                                                   |   |   |                |   |   |                            |   |   |                                            |   |   |                                       |   |   |                                        |   |   |                         |   |   |                         |   |   |                                              |   |   |                                                      |   |   |                    |   |   |                                                     |   |   |                  |  |    |  |
| f. Matatizo ya kibnafsi nyumbani (mgogoro wa familia, unyanyapaa)                                                                             | 1                                                                                                                                                                                                                                                                                                                                                                                                                                                                                                                                                                                                                                                                                                                                                                                                                                                                                                                                                                                                                                                                                                                                                                                                                                                                                                                                                                                                                                              | 2                         |     |    |                 |   |   |                       |   |   |                           |   |   |                                                  |   |   |                         |   |   |                                                                   |   |   |                |   |   |                            |   |   |                                            |   |   |                                       |   |   |                                        |   |   |                         |   |   |                         |   |   |                                              |   |   |                                                      |   |   |                    |   |   |                                                     |   |   |                  |  |    |  |
| g. Kuenda kazi                                                                                                                                | 1                                                                                                                                                                                                                                                                                                                                                                                                                                                                                                                                                                                                                                                                                                                                                                                                                                                                                                                                                                                                                                                                                                                                                                                                                                                                                                                                                                                                                                              | 2                         |     |    |                 |   |   |                       |   |   |                           |   |   |                                                  |   |   |                         |   |   |                                                                   |   |   |                |   |   |                            |   |   |                                            |   |   |                                       |   |   |                                        |   |   |                         |   |   |                         |   |   |                                              |   |   |                                                      |   |   |                    |   |   |                                                     |   |   |                  |  |    |  |
| h. Kutoroka ndoa za mapema                                                                                                                    | 1                                                                                                                                                                                                                                                                                                                                                                                                                                                                                                                                                                                                                                                                                                                                                                                                                                                                                                                                                                                                                                                                                                                                                                                                                                                                                                                                                                                                                                              | 2                         |     |    |                 |   |   |                       |   |   |                           |   |   |                                                  |   |   |                         |   |   |                                                                   |   |   |                |   |   |                            |   |   |                                            |   |   |                                       |   |   |                                        |   |   |                         |   |   |                         |   |   |                                              |   |   |                                                      |   |   |                    |   |   |                                                     |   |   |                  |  |    |  |
| i. Kutengana au kutalakiana na mume/mwenzi                                                                                                    | 1                                                                                                                                                                                                                                                                                                                                                                                                                                                                                                                                                                                                                                                                                                                                                                                                                                                                                                                                                                                                                                                                                                                                                                                                                                                                                                                                                                                                                                              | 2                         |     |    |                 |   |   |                       |   |   |                           |   |   |                                                  |   |   |                         |   |   |                                                                   |   |   |                |   |   |                            |   |   |                                            |   |   |                                       |   |   |                                        |   |   |                         |   |   |                         |   |   |                                              |   |   |                                                      |   |   |                    |   |   |                                                     |   |   |                  |  |    |  |
| j. Kifo cha mzazi au cha wazazi/mlezi                                                                                                         | 1                                                                                                                                                                                                                                                                                                                                                                                                                                                                                                                                                                                                                                                                                                                                                                                                                                                                                                                                                                                                                                                                                                                                                                                                                                                                                                                                                                                                                                              | 2                         |     |    |                 |   |   |                       |   |   |                           |   |   |                                                  |   |   |                         |   |   |                                                                   |   |   |                |   |   |                            |   |   |                                            |   |   |                                       |   |   |                                        |   |   |                         |   |   |                         |   |   |                                              |   |   |                                                      |   |   |                    |   |   |                                                     |   |   |                  |  |    |  |
| k. Kutengana au kutalakiana kwa wazazi                                                                                                        | 1                                                                                                                                                                                                                                                                                                                                                                                                                                                                                                                                                                                                                                                                                                                                                                                                                                                                                                                                                                                                                                                                                                                                                                                                                                                                                                                                                                                                                                              | 2                         |     |    |                 |   |   |                       |   |   |                           |   |   |                                                  |   |   |                         |   |   |                                                                   |   |   |                |   |   |                            |   |   |                                            |   |   |                                       |   |   |                                        |   |   |                         |   |   |                         |   |   |                                              |   |   |                                                      |   |   |                    |   |   |                                                     |   |   |                  |  |    |  |
| l. Kifo cha mume/mwenzi                                                                                                                       | 1                                                                                                                                                                                                                                                                                                                                                                                                                                                                                                                                                                                                                                                                                                                                                                                                                                                                                                                                                                                                                                                                                                                                                                                                                                                                                                                                                                                                                                              | 2                         |     |    |                 |   |   |                       |   |   |                           |   |   |                                                  |   |   |                         |   |   |                                                                   |   |   |                |   |   |                            |   |   |                                            |   |   |                                       |   |   |                                        |   |   |                         |   |   |                         |   |   |                                              |   |   |                                                      |   |   |                    |   |   |                                                     |   |   |                  |  |    |  |
| m. Machafuko ya kisiasa                                                                                                                       | 1                                                                                                                                                                                                                                                                                                                                                                                                                                                                                                                                                                                                                                                                                                                                                                                                                                                                                                                                                                                                                                                                                                                                                                                                                                                                                                                                                                                                                                              | 2                         |     |    |                 |   |   |                       |   |   |                           |   |   |                                                  |   |   |                         |   |   |                                                                   |   |   |                |   |   |                            |   |   |                                            |   |   |                                       |   |   |                                        |   |   |                         |   |   |                         |   |   |                                              |   |   |                                                      |   |   |                    |   |   |                                                     |   |   |                  |  |    |  |
| n. Ukame au umasikini katika maeneo uliotoka                                                                                                  | 1                                                                                                                                                                                                                                                                                                                                                                                                                                                                                                                                                                                                                                                                                                                                                                                                                                                                                                                                                                                                                                                                                                                                                                                                                                                                                                                                                                                                                                              | 2                         |     |    |                 |   |   |                       |   |   |                           |   |   |                                                  |   |   |                         |   |   |                                                                   |   |   |                |   |   |                            |   |   |                                            |   |   |                                       |   |   |                                        |   |   |                         |   |   |                         |   |   |                                              |   |   |                                                      |   |   |                    |   |   |                                                     |   |   |                  |  |    |  |
| o. Fedheha (unyanyapaa) kwa sababu ya hali ya ukimwi                                                                                          | 1                                                                                                                                                                                                                                                                                                                                                                                                                                                                                                                                                                                                                                                                                                                                                                                                                                                                                                                                                                                                                                                                                                                                                                                                                                                                                                                                                                                                                                              | 2                         |     |    |                 |   |   |                       |   |   |                           |   |   |                                                  |   |   |                         |   |   |                                                                   |   |   |                |   |   |                            |   |   |                                            |   |   |                                       |   |   |                                        |   |   |                         |   |   |                         |   |   |                                              |   |   |                                                      |   |   |                    |   |   |                                                     |   |   |                  |  |    |  |
| p. Ukosefu wa karo                                                                                                                            | 1                                                                                                                                                                                                                                                                                                                                                                                                                                                                                                                                                                                                                                                                                                                                                                                                                                                                                                                                                                                                                                                                                                                                                                                                                                                                                                                                                                                                                                              | 2                         |     |    |                 |   |   |                       |   |   |                           |   |   |                                                  |   |   |                         |   |   |                                                                   |   |   |                |   |   |                            |   |   |                                            |   |   |                                       |   |   |                                        |   |   |                         |   |   |                         |   |   |                                              |   |   |                                                      |   |   |                    |   |   |                                                     |   |   |                  |  |    |  |
| q. Aina nyinginezo za fedheha (unyanyapaa) /ubaguzi                                                                                           | 1                                                                                                                                                                                                                                                                                                                                                                                                                                                                                                                                                                                                                                                                                                                                                                                                                                                                                                                                                                                                                                                                                                                                                                                                                                                                                                                                                                                                                                              | 2                         |     |    |                 |   |   |                       |   |   |                           |   |   |                                                  |   |   |                         |   |   |                                                                   |   |   |                |   |   |                            |   |   |                                            |   |   |                                       |   |   |                                        |   |   |                         |   |   |                         |   |   |                                              |   |   |                                                      |   |   |                    |   |   |                                                     |   |   |                  |  |    |  |
| r. Nyingine taja                                                                                                                              |                                                                                                                                                                                                                                                                                                                                                                                                                                                                                                                                                                                                                                                                                                                                                                                                                                                                                                                                                                                                                                                                                                                                                                                                                                                                                                                                                                                                                                                | 98                        |     |    |                 |   |   |                       |   |   |                           |   |   |                                                  |   |   |                         |   |   |                                                                   |   |   |                |   |   |                            |   |   |                                            |   |   |                                       |   |   |                                        |   |   |                         |   |   |                         |   |   |                                              |   |   |                                                      |   |   |                    |   |   |                                                     |   |   |                  |  |    |  |
|                                                                                                                                               | YES 1                                                                                                                                                                                                                                                                                                                                                                                                                                                                                                                                                                                                                                                                                                                                                                                                                                                                                                                                                                                                                                                                                                                                                                                                                                                                                                                                                                                                                                          | 112                       |     |    |                 |   |   |                       |   |   |                           |   |   |                                                  |   |   |                         |   |   |                                                                   |   |   |                |   |   |                            |   |   |                                            |   |   |                                       |   |   |                                        |   |   |                         |   |   |                         |   |   |                                              |   |   |                                                      |   |   |                    |   |   |                                                     |   |   |                  |  |    |  |



| Je, mama mzazi yungali hai?                                                                                             | NO 2<br>DON'T KNOW 88                                                                                                                                                                                                                                                                                                                                                                                                                                                                                                                                                                                                                                                                                                                                                                                                                                                                                                                                                                                                                                                                                                                                                                                                                                                                                             | 112        |     |    |         |   |   |             |   |   |          |   |   |           |   |   |          |   |   |          |   |   |        |   |   |          |   |   |         |   |   |                   |   |   |           |   |   |             |   |   |              |   |   |            |   |   |             |   |   |           |   |   |          |   |   |           |   |   |          |   |   |         |   |   |          |   |   |           |   |   |         |   |   |                          |   |   |  |
|-------------------------------------------------------------------------------------------------------------------------|-------------------------------------------------------------------------------------------------------------------------------------------------------------------------------------------------------------------------------------------------------------------------------------------------------------------------------------------------------------------------------------------------------------------------------------------------------------------------------------------------------------------------------------------------------------------------------------------------------------------------------------------------------------------------------------------------------------------------------------------------------------------------------------------------------------------------------------------------------------------------------------------------------------------------------------------------------------------------------------------------------------------------------------------------------------------------------------------------------------------------------------------------------------------------------------------------------------------------------------------------------------------------------------------------------------------|------------|-----|----|---------|---|---|-------------|---|---|----------|---|---|-----------|---|---|----------|---|---|----------|---|---|--------|---|---|----------|---|---|---------|---|---|-------------------|---|---|-----------|---|---|-------------|---|---|--------------|---|---|------------|---|---|-------------|---|---|-----------|---|---|----------|---|---|-----------|---|---|----------|---|---|---------|---|---|----------|---|---|-----------|---|---|---------|---|---|--------------------------|---|---|--|
| Je, ulikuwa na umri gani mama yako alipofariki?                                                                         | AGE IN YEARS <input type="text"/><br><br>DON'T KNOW 88                                                                                                                                                                                                                                                                                                                                                                                                                                                                                                                                                                                                                                                                                                                                                                                                                                                                                                                                                                                                                                                                                                                                                                                                                                                            |            |     |    |         |   |   |             |   |   |          |   |   |           |   |   |          |   |   |          |   |   |        |   |   |          |   |   |         |   |   |                   |   |   |           |   |   |             |   |   |              |   |   |            |   |   |             |   |   |           |   |   |          |   |   |           |   |   |          |   |   |         |   |   |          |   |   |           |   |   |         |   |   |                          |   |   |  |
| Je, mama yako alisoma mpaka kiwango kipi cha juu zaidi cha elimu?                                                       | NO EDUCATION 1<br>NURSERY SCHOOL 2<br>SOME PRIMARY SCHOOL 3<br>COMPLETED PRIMARY SCHOOL 4<br>SOME SECONDARY SCHOOL 5<br>COMPLETED SECONDARY SCHOOL 6<br>PRE-SECONDARY SCHOOL VOCATIONAL/TECHNICAL TRAINING 7<br>POST- SECONDARY SCHOOL VOCATIONAL/TECHNICAL TRAINING 8<br>COLLEGE/UNIVERSITY 9<br>DON'T KNOW 88                                                                                                                                                                                                                                                                                                                                                                                                                                                                                                                                                                                                                                                                                                                                                                                                                                                                                                                                                                                                   |            |     |    |         |   |   |             |   |   |          |   |   |           |   |   |          |   |   |          |   |   |        |   |   |          |   |   |         |   |   |                   |   |   |           |   |   |             |   |   |              |   |   |            |   |   |             |   |   |           |   |   |          |   |   |           |   |   |          |   |   |         |   |   |          |   |   |           |   |   |         |   |   |                          |   |   |  |
| Je, baba yako yungali hai?                                                                                              | YES 1<br>NO 2<br>DON'T KNOW 88                                                                                                                                                                                                                                                                                                                                                                                                                                                                                                                                                                                                                                                                                                                                                                                                                                                                                                                                                                                                                                                                                                                                                                                                                                                                                    | 115<br>115 |     |    |         |   |   |             |   |   |          |   |   |           |   |   |          |   |   |          |   |   |        |   |   |          |   |   |         |   |   |                   |   |   |           |   |   |             |   |   |              |   |   |            |   |   |             |   |   |           |   |   |          |   |   |           |   |   |          |   |   |         |   |   |          |   |   |           |   |   |         |   |   |                          |   |   |  |
| Je, ulikuwa na umri gani baba yako alipofariki?                                                                         | AGE IN YEARS <input type="text"/><br><br>DON'T KNOW 88                                                                                                                                                                                                                                                                                                                                                                                                                                                                                                                                                                                                                                                                                                                                                                                                                                                                                                                                                                                                                                                                                                                                                                                                                                                            |            |     |    |         |   |   |             |   |   |          |   |   |           |   |   |          |   |   |          |   |   |        |   |   |          |   |   |         |   |   |                   |   |   |           |   |   |             |   |   |              |   |   |            |   |   |             |   |   |           |   |   |          |   |   |           |   |   |          |   |   |         |   |   |          |   |   |           |   |   |         |   |   |                          |   |   |  |
| Je, baba yako alisoma hadi kiwango kipi cha juu zaidi cha elimu?                                                        | NO EDUCATION 1<br>NURSERY SCHOOL 2<br>SOME PRIMARY SCHOOL 3<br>CLASS 8 4<br>SOME SECONDARY SCHOOL 5<br>FORM 4 6<br>PRE-SECONDARY SCHOOL VOCATIONAL/TECHNICAL TRAINING 7<br>POST- SECONDARY SCHOOL VOCATIONAL/TECHNICAL TRAINING 8<br>COLLEGE/UNIVERSITY 9<br>DON'T KNOW 88                                                                                                                                                                                                                                                                                                                                                                                                                                                                                                                                                                                                                                                                                                                                                                                                                                                                                                                                                                                                                                        |            |     |    |         |   |   |             |   |   |          |   |   |           |   |   |          |   |   |          |   |   |        |   |   |          |   |   |         |   |   |                   |   |   |           |   |   |             |   |   |              |   |   |            |   |   |             |   |   |           |   |   |          |   |   |           |   |   |          |   |   |         |   |   |          |   |   |           |   |   |         |   |   |                          |   |   |  |
| Kabila lako ni gani?<br><br>[RECORD ALL MENTIONED]                                                                      | <table border="0"> <thead> <tr> <th></th> <th>YES</th> <th>NO</th> </tr> </thead> <tbody> <tr><td>EMBU</td><td>1</td><td>2</td></tr> <tr><td>KALENJIN</td><td>1</td><td>2</td></tr> <tr><td>KAMBA</td><td>1</td><td>2</td></tr> <tr><td>KIKUYU</td><td>1</td><td>2</td></tr> <tr><td>KISII</td><td>1</td><td>2</td></tr> <tr><td>LUHYA</td><td>1</td><td>2</td></tr> <tr><td>LUO</td><td>1</td><td>2</td></tr> <tr><td>MASAI</td><td>1</td><td>2</td></tr> <tr><td>MERU</td><td>1</td><td>2</td></tr> <tr><td>MIJIKENDA/SWAHILI</td><td>1</td><td>2</td></tr> <tr><td>SOMALI</td><td>1</td><td>2</td></tr> <tr><td>BORANA</td><td>1</td><td>2</td></tr> <tr><td>TAITA/TAVETA</td><td>1</td><td>2</td></tr> <tr><td>NUBIAN</td><td>1</td><td>2</td></tr> <tr><td>OTHER _____</td><td>1</td><td>2</td></tr> </tbody> </table>                                                                                                                                                                                                                                                                                                                                                                                                                                                                                       |            | YES | NO | EMBU    | 1 | 2 | KALENJIN    | 1 | 2 | KAMBA    | 1 | 2 | KIKUYU    | 1 | 2 | KISII    | 1 | 2 | LUHYA    | 1 | 2 | LUO    | 1 | 2 | MASAI    | 1 | 2 | MERU    | 1 | 2 | MIJIKENDA/SWAHILI | 1 | 2 | SOMALI    | 1 | 2 | BORANA      | 1 | 2 | TAITA/TAVETA | 1 | 2 | NUBIAN     | 1 | 2 | OTHER _____ | 1 | 2 |           |   |   |          |   |   |           |   |   |          |   |   |         |   |   |          |   |   |           |   |   |         |   |   |                          |   |   |  |
|                                                                                                                         | YES                                                                                                                                                                                                                                                                                                                                                                                                                                                                                                                                                                                                                                                                                                                                                                                                                                                                                                                                                                                                                                                                                                                                                                                                                                                                                                               | NO         |     |    |         |   |   |             |   |   |          |   |   |           |   |   |          |   |   |          |   |   |        |   |   |          |   |   |         |   |   |                   |   |   |           |   |   |             |   |   |              |   |   |            |   |   |             |   |   |           |   |   |          |   |   |           |   |   |          |   |   |         |   |   |          |   |   |           |   |   |         |   |   |                          |   |   |  |
| EMBU                                                                                                                    | 1                                                                                                                                                                                                                                                                                                                                                                                                                                                                                                                                                                                                                                                                                                                                                                                                                                                                                                                                                                                                                                                                                                                                                                                                                                                                                                                 | 2          |     |    |         |   |   |             |   |   |          |   |   |           |   |   |          |   |   |          |   |   |        |   |   |          |   |   |         |   |   |                   |   |   |           |   |   |             |   |   |              |   |   |            |   |   |             |   |   |           |   |   |          |   |   |           |   |   |          |   |   |         |   |   |          |   |   |           |   |   |         |   |   |                          |   |   |  |
| KALENJIN                                                                                                                | 1                                                                                                                                                                                                                                                                                                                                                                                                                                                                                                                                                                                                                                                                                                                                                                                                                                                                                                                                                                                                                                                                                                                                                                                                                                                                                                                 | 2          |     |    |         |   |   |             |   |   |          |   |   |           |   |   |          |   |   |          |   |   |        |   |   |          |   |   |         |   |   |                   |   |   |           |   |   |             |   |   |              |   |   |            |   |   |             |   |   |           |   |   |          |   |   |           |   |   |          |   |   |         |   |   |          |   |   |           |   |   |         |   |   |                          |   |   |  |
| KAMBA                                                                                                                   | 1                                                                                                                                                                                                                                                                                                                                                                                                                                                                                                                                                                                                                                                                                                                                                                                                                                                                                                                                                                                                                                                                                                                                                                                                                                                                                                                 | 2          |     |    |         |   |   |             |   |   |          |   |   |           |   |   |          |   |   |          |   |   |        |   |   |          |   |   |         |   |   |                   |   |   |           |   |   |             |   |   |              |   |   |            |   |   |             |   |   |           |   |   |          |   |   |           |   |   |          |   |   |         |   |   |          |   |   |           |   |   |         |   |   |                          |   |   |  |
| KIKUYU                                                                                                                  | 1                                                                                                                                                                                                                                                                                                                                                                                                                                                                                                                                                                                                                                                                                                                                                                                                                                                                                                                                                                                                                                                                                                                                                                                                                                                                                                                 | 2          |     |    |         |   |   |             |   |   |          |   |   |           |   |   |          |   |   |          |   |   |        |   |   |          |   |   |         |   |   |                   |   |   |           |   |   |             |   |   |              |   |   |            |   |   |             |   |   |           |   |   |          |   |   |           |   |   |          |   |   |         |   |   |          |   |   |           |   |   |         |   |   |                          |   |   |  |
| KISII                                                                                                                   | 1                                                                                                                                                                                                                                                                                                                                                                                                                                                                                                                                                                                                                                                                                                                                                                                                                                                                                                                                                                                                                                                                                                                                                                                                                                                                                                                 | 2          |     |    |         |   |   |             |   |   |          |   |   |           |   |   |          |   |   |          |   |   |        |   |   |          |   |   |         |   |   |                   |   |   |           |   |   |             |   |   |              |   |   |            |   |   |             |   |   |           |   |   |          |   |   |           |   |   |          |   |   |         |   |   |          |   |   |           |   |   |         |   |   |                          |   |   |  |
| LUHYA                                                                                                                   | 1                                                                                                                                                                                                                                                                                                                                                                                                                                                                                                                                                                                                                                                                                                                                                                                                                                                                                                                                                                                                                                                                                                                                                                                                                                                                                                                 | 2          |     |    |         |   |   |             |   |   |          |   |   |           |   |   |          |   |   |          |   |   |        |   |   |          |   |   |         |   |   |                   |   |   |           |   |   |             |   |   |              |   |   |            |   |   |             |   |   |           |   |   |          |   |   |           |   |   |          |   |   |         |   |   |          |   |   |           |   |   |         |   |   |                          |   |   |  |
| LUO                                                                                                                     | 1                                                                                                                                                                                                                                                                                                                                                                                                                                                                                                                                                                                                                                                                                                                                                                                                                                                                                                                                                                                                                                                                                                                                                                                                                                                                                                                 | 2          |     |    |         |   |   |             |   |   |          |   |   |           |   |   |          |   |   |          |   |   |        |   |   |          |   |   |         |   |   |                   |   |   |           |   |   |             |   |   |              |   |   |            |   |   |             |   |   |           |   |   |          |   |   |           |   |   |          |   |   |         |   |   |          |   |   |           |   |   |         |   |   |                          |   |   |  |
| MASAI                                                                                                                   | 1                                                                                                                                                                                                                                                                                                                                                                                                                                                                                                                                                                                                                                                                                                                                                                                                                                                                                                                                                                                                                                                                                                                                                                                                                                                                                                                 | 2          |     |    |         |   |   |             |   |   |          |   |   |           |   |   |          |   |   |          |   |   |        |   |   |          |   |   |         |   |   |                   |   |   |           |   |   |             |   |   |              |   |   |            |   |   |             |   |   |           |   |   |          |   |   |           |   |   |          |   |   |         |   |   |          |   |   |           |   |   |         |   |   |                          |   |   |  |
| MERU                                                                                                                    | 1                                                                                                                                                                                                                                                                                                                                                                                                                                                                                                                                                                                                                                                                                                                                                                                                                                                                                                                                                                                                                                                                                                                                                                                                                                                                                                                 | 2          |     |    |         |   |   |             |   |   |          |   |   |           |   |   |          |   |   |          |   |   |        |   |   |          |   |   |         |   |   |                   |   |   |           |   |   |             |   |   |              |   |   |            |   |   |             |   |   |           |   |   |          |   |   |           |   |   |          |   |   |         |   |   |          |   |   |           |   |   |         |   |   |                          |   |   |  |
| MIJIKENDA/SWAHILI                                                                                                       | 1                                                                                                                                                                                                                                                                                                                                                                                                                                                                                                                                                                                                                                                                                                                                                                                                                                                                                                                                                                                                                                                                                                                                                                                                                                                                                                                 | 2          |     |    |         |   |   |             |   |   |          |   |   |           |   |   |          |   |   |          |   |   |        |   |   |          |   |   |         |   |   |                   |   |   |           |   |   |             |   |   |              |   |   |            |   |   |             |   |   |           |   |   |          |   |   |           |   |   |          |   |   |         |   |   |          |   |   |           |   |   |         |   |   |                          |   |   |  |
| SOMALI                                                                                                                  | 1                                                                                                                                                                                                                                                                                                                                                                                                                                                                                                                                                                                                                                                                                                                                                                                                                                                                                                                                                                                                                                                                                                                                                                                                                                                                                                                 | 2          |     |    |         |   |   |             |   |   |          |   |   |           |   |   |          |   |   |          |   |   |        |   |   |          |   |   |         |   |   |                   |   |   |           |   |   |             |   |   |              |   |   |            |   |   |             |   |   |           |   |   |          |   |   |           |   |   |          |   |   |         |   |   |          |   |   |           |   |   |         |   |   |                          |   |   |  |
| BORANA                                                                                                                  | 1                                                                                                                                                                                                                                                                                                                                                                                                                                                                                                                                                                                                                                                                                                                                                                                                                                                                                                                                                                                                                                                                                                                                                                                                                                                                                                                 | 2          |     |    |         |   |   |             |   |   |          |   |   |           |   |   |          |   |   |          |   |   |        |   |   |          |   |   |         |   |   |                   |   |   |           |   |   |             |   |   |              |   |   |            |   |   |             |   |   |           |   |   |          |   |   |           |   |   |          |   |   |         |   |   |          |   |   |           |   |   |         |   |   |                          |   |   |  |
| TAITA/TAVETA                                                                                                            | 1                                                                                                                                                                                                                                                                                                                                                                                                                                                                                                                                                                                                                                                                                                                                                                                                                                                                                                                                                                                                                                                                                                                                                                                                                                                                                                                 | 2          |     |    |         |   |   |             |   |   |          |   |   |           |   |   |          |   |   |          |   |   |        |   |   |          |   |   |         |   |   |                   |   |   |           |   |   |             |   |   |              |   |   |            |   |   |             |   |   |           |   |   |          |   |   |           |   |   |          |   |   |         |   |   |          |   |   |           |   |   |         |   |   |                          |   |   |  |
| NUBIAN                                                                                                                  | 1                                                                                                                                                                                                                                                                                                                                                                                                                                                                                                                                                                                                                                                                                                                                                                                                                                                                                                                                                                                                                                                                                                                                                                                                                                                                                                                 | 2          |     |    |         |   |   |             |   |   |          |   |   |           |   |   |          |   |   |          |   |   |        |   |   |          |   |   |         |   |   |                   |   |   |           |   |   |             |   |   |              |   |   |            |   |   |             |   |   |           |   |   |          |   |   |           |   |   |          |   |   |         |   |   |          |   |   |           |   |   |         |   |   |                          |   |   |  |
| OTHER _____                                                                                                             | 1                                                                                                                                                                                                                                                                                                                                                                                                                                                                                                                                                                                                                                                                                                                                                                                                                                                                                                                                                                                                                                                                                                                                                                                                                                                                                                                 | 2          |     |    |         |   |   |             |   |   |          |   |   |           |   |   |          |   |   |          |   |   |        |   |   |          |   |   |         |   |   |                   |   |   |           |   |   |             |   |   |              |   |   |            |   |   |             |   |   |           |   |   |          |   |   |           |   |   |          |   |   |         |   |   |          |   |   |           |   |   |         |   |   |                          |   |   |  |
| Wewe huongea lugha gani nyumbani?<br><br>[RECORD ALL MENTIONED]<br><br>Note: Update with additional Mijikenda languages | <table border="0"> <thead> <tr> <th></th> <th>YES</th> <th>NO</th> </tr> </thead> <tbody> <tr><td>a. EMBU</td><td>1</td><td>2</td></tr> <tr><td>b. KALENJIN</td><td>1</td><td>2</td></tr> <tr><td>c. KAMBA</td><td>1</td><td>2</td></tr> <tr><td>d. KIKUYU</td><td>1</td><td>2</td></tr> <tr><td>e. KISII</td><td>1</td><td>2</td></tr> <tr><td>f. LUHYA</td><td>1</td><td>2</td></tr> <tr><td>g. LUO</td><td>1</td><td>2</td></tr> <tr><td>h. MASAI</td><td>1</td><td>2</td></tr> <tr><td>i. MERU</td><td>1</td><td>2</td></tr> <tr><td>j. GIRIAMA</td><td>1</td><td>2</td></tr> <tr><td>k. SOMALI</td><td>1</td><td>2</td></tr> <tr><td>l. KIBORANA</td><td>1</td><td>2</td></tr> <tr><td>m. KISWAHILI</td><td>1</td><td>2</td></tr> <tr><td>n. ENGLISH</td><td>1</td><td>2</td></tr> <tr><td>o. NUBIAN</td><td>1</td><td>2</td></tr> <tr><td>p. CHONYI</td><td>1</td><td>2</td></tr> <tr><td>q. RABAI</td><td>1</td><td>2</td></tr> <tr><td>r. DURUMA</td><td>1</td><td>2</td></tr> <tr><td>s. KAUMA</td><td>1</td><td>2</td></tr> <tr><td>t. DIGO</td><td>1</td><td>2</td></tr> <tr><td>u. KAMBE</td><td>1</td><td>2</td></tr> <tr><td>v. JIBANA</td><td>1</td><td>2</td></tr> <tr><td>w. RIBE</td><td>1</td><td>2</td></tr> <tr><td>x. OTHER (SPECIFY) _____</td><td>1</td><td>2</td></tr> </tbody> </table> |            | YES | NO | a. EMBU | 1 | 2 | b. KALENJIN | 1 | 2 | c. KAMBA | 1 | 2 | d. KIKUYU | 1 | 2 | e. KISII | 1 | 2 | f. LUHYA | 1 | 2 | g. LUO | 1 | 2 | h. MASAI | 1 | 2 | i. MERU | 1 | 2 | j. GIRIAMA        | 1 | 2 | k. SOMALI | 1 | 2 | l. KIBORANA | 1 | 2 | m. KISWAHILI | 1 | 2 | n. ENGLISH | 1 | 2 | o. NUBIAN   | 1 | 2 | p. CHONYI | 1 | 2 | q. RABAI | 1 | 2 | r. DURUMA | 1 | 2 | s. KAUMA | 1 | 2 | t. DIGO | 1 | 2 | u. KAMBE | 1 | 2 | v. JIBANA | 1 | 2 | w. RIBE | 1 | 2 | x. OTHER (SPECIFY) _____ | 1 | 2 |  |
|                                                                                                                         | YES                                                                                                                                                                                                                                                                                                                                                                                                                                                                                                                                                                                                                                                                                                                                                                                                                                                                                                                                                                                                                                                                                                                                                                                                                                                                                                               | NO         |     |    |         |   |   |             |   |   |          |   |   |           |   |   |          |   |   |          |   |   |        |   |   |          |   |   |         |   |   |                   |   |   |           |   |   |             |   |   |              |   |   |            |   |   |             |   |   |           |   |   |          |   |   |           |   |   |          |   |   |         |   |   |          |   |   |           |   |   |         |   |   |                          |   |   |  |
| a. EMBU                                                                                                                 | 1                                                                                                                                                                                                                                                                                                                                                                                                                                                                                                                                                                                                                                                                                                                                                                                                                                                                                                                                                                                                                                                                                                                                                                                                                                                                                                                 | 2          |     |    |         |   |   |             |   |   |          |   |   |           |   |   |          |   |   |          |   |   |        |   |   |          |   |   |         |   |   |                   |   |   |           |   |   |             |   |   |              |   |   |            |   |   |             |   |   |           |   |   |          |   |   |           |   |   |          |   |   |         |   |   |          |   |   |           |   |   |         |   |   |                          |   |   |  |
| b. KALENJIN                                                                                                             | 1                                                                                                                                                                                                                                                                                                                                                                                                                                                                                                                                                                                                                                                                                                                                                                                                                                                                                                                                                                                                                                                                                                                                                                                                                                                                                                                 | 2          |     |    |         |   |   |             |   |   |          |   |   |           |   |   |          |   |   |          |   |   |        |   |   |          |   |   |         |   |   |                   |   |   |           |   |   |             |   |   |              |   |   |            |   |   |             |   |   |           |   |   |          |   |   |           |   |   |          |   |   |         |   |   |          |   |   |           |   |   |         |   |   |                          |   |   |  |
| c. KAMBA                                                                                                                | 1                                                                                                                                                                                                                                                                                                                                                                                                                                                                                                                                                                                                                                                                                                                                                                                                                                                                                                                                                                                                                                                                                                                                                                                                                                                                                                                 | 2          |     |    |         |   |   |             |   |   |          |   |   |           |   |   |          |   |   |          |   |   |        |   |   |          |   |   |         |   |   |                   |   |   |           |   |   |             |   |   |              |   |   |            |   |   |             |   |   |           |   |   |          |   |   |           |   |   |          |   |   |         |   |   |          |   |   |           |   |   |         |   |   |                          |   |   |  |
| d. KIKUYU                                                                                                               | 1                                                                                                                                                                                                                                                                                                                                                                                                                                                                                                                                                                                                                                                                                                                                                                                                                                                                                                                                                                                                                                                                                                                                                                                                                                                                                                                 | 2          |     |    |         |   |   |             |   |   |          |   |   |           |   |   |          |   |   |          |   |   |        |   |   |          |   |   |         |   |   |                   |   |   |           |   |   |             |   |   |              |   |   |            |   |   |             |   |   |           |   |   |          |   |   |           |   |   |          |   |   |         |   |   |          |   |   |           |   |   |         |   |   |                          |   |   |  |
| e. KISII                                                                                                                | 1                                                                                                                                                                                                                                                                                                                                                                                                                                                                                                                                                                                                                                                                                                                                                                                                                                                                                                                                                                                                                                                                                                                                                                                                                                                                                                                 | 2          |     |    |         |   |   |             |   |   |          |   |   |           |   |   |          |   |   |          |   |   |        |   |   |          |   |   |         |   |   |                   |   |   |           |   |   |             |   |   |              |   |   |            |   |   |             |   |   |           |   |   |          |   |   |           |   |   |          |   |   |         |   |   |          |   |   |           |   |   |         |   |   |                          |   |   |  |
| f. LUHYA                                                                                                                | 1                                                                                                                                                                                                                                                                                                                                                                                                                                                                                                                                                                                                                                                                                                                                                                                                                                                                                                                                                                                                                                                                                                                                                                                                                                                                                                                 | 2          |     |    |         |   |   |             |   |   |          |   |   |           |   |   |          |   |   |          |   |   |        |   |   |          |   |   |         |   |   |                   |   |   |           |   |   |             |   |   |              |   |   |            |   |   |             |   |   |           |   |   |          |   |   |           |   |   |          |   |   |         |   |   |          |   |   |           |   |   |         |   |   |                          |   |   |  |
| g. LUO                                                                                                                  | 1                                                                                                                                                                                                                                                                                                                                                                                                                                                                                                                                                                                                                                                                                                                                                                                                                                                                                                                                                                                                                                                                                                                                                                                                                                                                                                                 | 2          |     |    |         |   |   |             |   |   |          |   |   |           |   |   |          |   |   |          |   |   |        |   |   |          |   |   |         |   |   |                   |   |   |           |   |   |             |   |   |              |   |   |            |   |   |             |   |   |           |   |   |          |   |   |           |   |   |          |   |   |         |   |   |          |   |   |           |   |   |         |   |   |                          |   |   |  |
| h. MASAI                                                                                                                | 1                                                                                                                                                                                                                                                                                                                                                                                                                                                                                                                                                                                                                                                                                                                                                                                                                                                                                                                                                                                                                                                                                                                                                                                                                                                                                                                 | 2          |     |    |         |   |   |             |   |   |          |   |   |           |   |   |          |   |   |          |   |   |        |   |   |          |   |   |         |   |   |                   |   |   |           |   |   |             |   |   |              |   |   |            |   |   |             |   |   |           |   |   |          |   |   |           |   |   |          |   |   |         |   |   |          |   |   |           |   |   |         |   |   |                          |   |   |  |
| i. MERU                                                                                                                 | 1                                                                                                                                                                                                                                                                                                                                                                                                                                                                                                                                                                                                                                                                                                                                                                                                                                                                                                                                                                                                                                                                                                                                                                                                                                                                                                                 | 2          |     |    |         |   |   |             |   |   |          |   |   |           |   |   |          |   |   |          |   |   |        |   |   |          |   |   |         |   |   |                   |   |   |           |   |   |             |   |   |              |   |   |            |   |   |             |   |   |           |   |   |          |   |   |           |   |   |          |   |   |         |   |   |          |   |   |           |   |   |         |   |   |                          |   |   |  |
| j. GIRIAMA                                                                                                              | 1                                                                                                                                                                                                                                                                                                                                                                                                                                                                                                                                                                                                                                                                                                                                                                                                                                                                                                                                                                                                                                                                                                                                                                                                                                                                                                                 | 2          |     |    |         |   |   |             |   |   |          |   |   |           |   |   |          |   |   |          |   |   |        |   |   |          |   |   |         |   |   |                   |   |   |           |   |   |             |   |   |              |   |   |            |   |   |             |   |   |           |   |   |          |   |   |           |   |   |          |   |   |         |   |   |          |   |   |           |   |   |         |   |   |                          |   |   |  |
| k. SOMALI                                                                                                               | 1                                                                                                                                                                                                                                                                                                                                                                                                                                                                                                                                                                                                                                                                                                                                                                                                                                                                                                                                                                                                                                                                                                                                                                                                                                                                                                                 | 2          |     |    |         |   |   |             |   |   |          |   |   |           |   |   |          |   |   |          |   |   |        |   |   |          |   |   |         |   |   |                   |   |   |           |   |   |             |   |   |              |   |   |            |   |   |             |   |   |           |   |   |          |   |   |           |   |   |          |   |   |         |   |   |          |   |   |           |   |   |         |   |   |                          |   |   |  |
| l. KIBORANA                                                                                                             | 1                                                                                                                                                                                                                                                                                                                                                                                                                                                                                                                                                                                                                                                                                                                                                                                                                                                                                                                                                                                                                                                                                                                                                                                                                                                                                                                 | 2          |     |    |         |   |   |             |   |   |          |   |   |           |   |   |          |   |   |          |   |   |        |   |   |          |   |   |         |   |   |                   |   |   |           |   |   |             |   |   |              |   |   |            |   |   |             |   |   |           |   |   |          |   |   |           |   |   |          |   |   |         |   |   |          |   |   |           |   |   |         |   |   |                          |   |   |  |
| m. KISWAHILI                                                                                                            | 1                                                                                                                                                                                                                                                                                                                                                                                                                                                                                                                                                                                                                                                                                                                                                                                                                                                                                                                                                                                                                                                                                                                                                                                                                                                                                                                 | 2          |     |    |         |   |   |             |   |   |          |   |   |           |   |   |          |   |   |          |   |   |        |   |   |          |   |   |         |   |   |                   |   |   |           |   |   |             |   |   |              |   |   |            |   |   |             |   |   |           |   |   |          |   |   |           |   |   |          |   |   |         |   |   |          |   |   |           |   |   |         |   |   |                          |   |   |  |
| n. ENGLISH                                                                                                              | 1                                                                                                                                                                                                                                                                                                                                                                                                                                                                                                                                                                                                                                                                                                                                                                                                                                                                                                                                                                                                                                                                                                                                                                                                                                                                                                                 | 2          |     |    |         |   |   |             |   |   |          |   |   |           |   |   |          |   |   |          |   |   |        |   |   |          |   |   |         |   |   |                   |   |   |           |   |   |             |   |   |              |   |   |            |   |   |             |   |   |           |   |   |          |   |   |           |   |   |          |   |   |         |   |   |          |   |   |           |   |   |         |   |   |                          |   |   |  |
| o. NUBIAN                                                                                                               | 1                                                                                                                                                                                                                                                                                                                                                                                                                                                                                                                                                                                                                                                                                                                                                                                                                                                                                                                                                                                                                                                                                                                                                                                                                                                                                                                 | 2          |     |    |         |   |   |             |   |   |          |   |   |           |   |   |          |   |   |          |   |   |        |   |   |          |   |   |         |   |   |                   |   |   |           |   |   |             |   |   |              |   |   |            |   |   |             |   |   |           |   |   |          |   |   |           |   |   |          |   |   |         |   |   |          |   |   |           |   |   |         |   |   |                          |   |   |  |
| p. CHONYI                                                                                                               | 1                                                                                                                                                                                                                                                                                                                                                                                                                                                                                                                                                                                                                                                                                                                                                                                                                                                                                                                                                                                                                                                                                                                                                                                                                                                                                                                 | 2          |     |    |         |   |   |             |   |   |          |   |   |           |   |   |          |   |   |          |   |   |        |   |   |          |   |   |         |   |   |                   |   |   |           |   |   |             |   |   |              |   |   |            |   |   |             |   |   |           |   |   |          |   |   |           |   |   |          |   |   |         |   |   |          |   |   |           |   |   |         |   |   |                          |   |   |  |
| q. RABAI                                                                                                                | 1                                                                                                                                                                                                                                                                                                                                                                                                                                                                                                                                                                                                                                                                                                                                                                                                                                                                                                                                                                                                                                                                                                                                                                                                                                                                                                                 | 2          |     |    |         |   |   |             |   |   |          |   |   |           |   |   |          |   |   |          |   |   |        |   |   |          |   |   |         |   |   |                   |   |   |           |   |   |             |   |   |              |   |   |            |   |   |             |   |   |           |   |   |          |   |   |           |   |   |          |   |   |         |   |   |          |   |   |           |   |   |         |   |   |                          |   |   |  |
| r. DURUMA                                                                                                               | 1                                                                                                                                                                                                                                                                                                                                                                                                                                                                                                                                                                                                                                                                                                                                                                                                                                                                                                                                                                                                                                                                                                                                                                                                                                                                                                                 | 2          |     |    |         |   |   |             |   |   |          |   |   |           |   |   |          |   |   |          |   |   |        |   |   |          |   |   |         |   |   |                   |   |   |           |   |   |             |   |   |              |   |   |            |   |   |             |   |   |           |   |   |          |   |   |           |   |   |          |   |   |         |   |   |          |   |   |           |   |   |         |   |   |                          |   |   |  |
| s. KAUMA                                                                                                                | 1                                                                                                                                                                                                                                                                                                                                                                                                                                                                                                                                                                                                                                                                                                                                                                                                                                                                                                                                                                                                                                                                                                                                                                                                                                                                                                                 | 2          |     |    |         |   |   |             |   |   |          |   |   |           |   |   |          |   |   |          |   |   |        |   |   |          |   |   |         |   |   |                   |   |   |           |   |   |             |   |   |              |   |   |            |   |   |             |   |   |           |   |   |          |   |   |           |   |   |          |   |   |         |   |   |          |   |   |           |   |   |         |   |   |                          |   |   |  |
| t. DIGO                                                                                                                 | 1                                                                                                                                                                                                                                                                                                                                                                                                                                                                                                                                                                                                                                                                                                                                                                                                                                                                                                                                                                                                                                                                                                                                                                                                                                                                                                                 | 2          |     |    |         |   |   |             |   |   |          |   |   |           |   |   |          |   |   |          |   |   |        |   |   |          |   |   |         |   |   |                   |   |   |           |   |   |             |   |   |              |   |   |            |   |   |             |   |   |           |   |   |          |   |   |           |   |   |          |   |   |         |   |   |          |   |   |           |   |   |         |   |   |                          |   |   |  |
| u. KAMBE                                                                                                                | 1                                                                                                                                                                                                                                                                                                                                                                                                                                                                                                                                                                                                                                                                                                                                                                                                                                                                                                                                                                                                                                                                                                                                                                                                                                                                                                                 | 2          |     |    |         |   |   |             |   |   |          |   |   |           |   |   |          |   |   |          |   |   |        |   |   |          |   |   |         |   |   |                   |   |   |           |   |   |             |   |   |              |   |   |            |   |   |             |   |   |           |   |   |          |   |   |           |   |   |          |   |   |         |   |   |          |   |   |           |   |   |         |   |   |                          |   |   |  |
| v. JIBANA                                                                                                               | 1                                                                                                                                                                                                                                                                                                                                                                                                                                                                                                                                                                                                                                                                                                                                                                                                                                                                                                                                                                                                                                                                                                                                                                                                                                                                                                                 | 2          |     |    |         |   |   |             |   |   |          |   |   |           |   |   |          |   |   |          |   |   |        |   |   |          |   |   |         |   |   |                   |   |   |           |   |   |             |   |   |              |   |   |            |   |   |             |   |   |           |   |   |          |   |   |           |   |   |          |   |   |         |   |   |          |   |   |           |   |   |         |   |   |                          |   |   |  |
| w. RIBE                                                                                                                 | 1                                                                                                                                                                                                                                                                                                                                                                                                                                                                                                                                                                                                                                                                                                                                                                                                                                                                                                                                                                                                                                                                                                                                                                                                                                                                                                                 | 2          |     |    |         |   |   |             |   |   |          |   |   |           |   |   |          |   |   |          |   |   |        |   |   |          |   |   |         |   |   |                   |   |   |           |   |   |             |   |   |              |   |   |            |   |   |             |   |   |           |   |   |          |   |   |           |   |   |          |   |   |         |   |   |          |   |   |           |   |   |         |   |   |                          |   |   |  |
| x. OTHER (SPECIFY) _____                                                                                                | 1                                                                                                                                                                                                                                                                                                                                                                                                                                                                                                                                                                                                                                                                                                                                                                                                                                                                                                                                                                                                                                                                                                                                                                                                                                                                                                                 | 2          |     |    |         |   |   |             |   |   |          |   |   |           |   |   |          |   |   |          |   |   |        |   |   |          |   |   |         |   |   |                   |   |   |           |   |   |             |   |   |              |   |   |            |   |   |             |   |   |           |   |   |          |   |   |           |   |   |          |   |   |         |   |   |          |   |   |           |   |   |         |   |   |                          |   |   |  |
| Je, waweza kuongea lugha nyingineyo vizuri kiasi cha kuweza kuendeleza mazungumzo? [IF YES, ASK:] Lugha gani/zipi?      | <table border="0"> <thead> <tr> <th></th> <th>YES</th> <th>NO</th> </tr> </thead> <tbody> <tr><td>a. EMBU</td><td>1</td><td>2</td></tr> <tr><td>b. KALENJIN</td><td>1</td><td>2</td></tr> </tbody> </table>                                                                                                                                                                                                                                                                                                                                                                                                                                                                                                                                                                                                                                                                                                                                                                                                                                                                                                                                                                                                                                                                                                       |            | YES | NO | a. EMBU | 1 | 2 | b. KALENJIN | 1 | 2 |          |   |   |           |   |   |          |   |   |          |   |   |        |   |   |          |   |   |         |   |   |                   |   |   |           |   |   |             |   |   |              |   |   |            |   |   |             |   |   |           |   |   |          |   |   |           |   |   |          |   |   |         |   |   |          |   |   |           |   |   |         |   |   |                          |   |   |  |
|                                                                                                                         | YES                                                                                                                                                                                                                                                                                                                                                                                                                                                                                                                                                                                                                                                                                                                                                                                                                                                                                                                                                                                                                                                                                                                                                                                                                                                                                                               | NO         |     |    |         |   |   |             |   |   |          |   |   |           |   |   |          |   |   |          |   |   |        |   |   |          |   |   |         |   |   |                   |   |   |           |   |   |             |   |   |              |   |   |            |   |   |             |   |   |           |   |   |          |   |   |           |   |   |          |   |   |         |   |   |          |   |   |           |   |   |         |   |   |                          |   |   |  |
| a. EMBU                                                                                                                 | 1                                                                                                                                                                                                                                                                                                                                                                                                                                                                                                                                                                                                                                                                                                                                                                                                                                                                                                                                                                                                                                                                                                                                                                                                                                                                                                                 | 2          |     |    |         |   |   |             |   |   |          |   |   |           |   |   |          |   |   |          |   |   |        |   |   |          |   |   |         |   |   |                   |   |   |           |   |   |             |   |   |              |   |   |            |   |   |             |   |   |           |   |   |          |   |   |           |   |   |          |   |   |         |   |   |          |   |   |           |   |   |         |   |   |                          |   |   |  |
| b. KALENJIN                                                                                                             | 1                                                                                                                                                                                                                                                                                                                                                                                                                                                                                                                                                                                                                                                                                                                                                                                                                                                                                                                                                                                                                                                                                                                                                                                                                                                                                                                 | 2          |     |    |         |   |   |             |   |   |          |   |   |           |   |   |          |   |   |          |   |   |        |   |   |          |   |   |         |   |   |                   |   |   |           |   |   |             |   |   |              |   |   |            |   |   |             |   |   |           |   |   |          |   |   |           |   |   |          |   |   |         |   |   |          |   |   |           |   |   |         |   |   |                          |   |   |  |

|                                                                                                                                                                                                                                                                                                                                                         |                                                                                                                  |                                                                                                                                                                                                                                                                                                                                                                                  |             |                                                                                                                              |                               |                                                                               |  |                                                                                                                                                        |
|---------------------------------------------------------------------------------------------------------------------------------------------------------------------------------------------------------------------------------------------------------------------------------------------------------------------------------------------------------|------------------------------------------------------------------------------------------------------------------|----------------------------------------------------------------------------------------------------------------------------------------------------------------------------------------------------------------------------------------------------------------------------------------------------------------------------------------------------------------------------------|-------------|------------------------------------------------------------------------------------------------------------------------------|-------------------------------|-------------------------------------------------------------------------------|--|--------------------------------------------------------------------------------------------------------------------------------------------------------|
| [RECORD ALL MENTIONED]                                                                                                                                                                                                                                                                                                                                  |                                                                                                                  | c. KAMBA 1 2<br>d. KIKUYU 1 2<br>e. KISII 1 2<br>f. LUHYA 1 2<br>g. LUO 1 2<br>h. MASAI 1 2<br>i. MERU 1 2<br>j. GIRIAMA 1 2<br>k. SOMALI 1 2<br>l. KIBORANA 1 2<br>m. KISWAHILI 1 2<br>n. ENGLISH 1 2<br>o. NUBIAN 1 2<br>p. CHONYI 1 2<br>q. RABAI 1 2<br>r. DURUMA 1 2<br>s. KAUMA 1 2<br>t. DIGO 1 2<br>u. KAMBE 1 2<br>v. JIBANA 1 2<br>w. RIBE 1 2<br>p. OTHER SPECIFY 1 2 |             |                                                                                                                              |                               |                                                                               |  |                                                                                                                                                        |
| Dini yako ni gani?                                                                                                                                                                                                                                                                                                                                      | CATHOLIC 1<br>PROTESTANT 2<br>ISLAM 3<br>TRADITIONAL 4<br>NO RELIGION 5<br>OTHER (SPECIFY____) 96                |                                                                                                                                                                                                                                                                                                                                                                                  |             |                                                                                                                              |                               |                                                                               |  |                                                                                                                                                        |
| Je, dini ni muhimu kwako kwa kiasi gani?                                                                                                                                                                                                                                                                                                                | <b>READ OUT OPTIONS</b><br>MUHIMU SANA 1<br>MUHIMU KIASI 2<br>SIO MUHIMU 3                                       |                                                                                                                                                                                                                                                                                                                                                                                  |             |                                                                                                                              |                               |                                                                               |  |                                                                                                                                                        |
| Sasa, ningependa kukuuliza maswali machache kuhusu watu wengine mnaoishi nao. Nitauliza kuhusu elimu na kazi ya kila mtu ambaye unaishi naye. Kando na wewe, ni watu wangapi wengine wanaishi ndani ya nyumba yenu?                                                                                                                                     | NAMBARI YA WATU <input type="text"/><br>NONE 0                                                                   |                                                                                                                                                                                                                                                                                                                                                                                  | 123         |                                                                                                                              |                               |                                                                               |  |                                                                                                                                                        |
| <b>EXCLUDING RESPONDENT</b>                                                                                                                                                                                                                                                                                                                             |                                                                                                                  |                                                                                                                                                                                                                                                                                                                                                                                  |             |                                                                                                                              |                               |                                                                               |  |                                                                                                                                                        |
| START BY ASKING WHO THEY LIVE WITH, CONTINUE TO PROBE ABOUT OTHERS WHO LIVE IN THE HOUSEHOLD UNTIL ALL WHO LIVE WITH THE RESPONDENT HAVE BEEN IDENTIFIED. HOUSEHOLD MEMBER IS DEFINED AS SOMEONE WHO REPORTS TO THE SAME HOUSEHOLD HEAD AND EATS FROM THE SAME POT. . ASK SCHOOL/WORK QUESTIONS – 122e & 122f and 122g– ONLY OF PERSONS AGE 5 AND ABOVE |                                                                                                                  |                                                                                                                                                                                                                                                                                                                                                                                  |             |                                                                                                                              |                               |                                                                               |  |                                                                                                                                                        |
| <b>122a</b>                                                                                                                                                                                                                                                                                                                                             | <b>122b</b>                                                                                                      | <b>122c</b>                                                                                                                                                                                                                                                                                                                                                                      | <b>122d</b> | <b>122e</b>                                                                                                                  | <b>122f</b>                   | <b>122g</b>                                                                   |  |                                                                                                                                                        |
| Jina                                                                                                                                                                                                                                                                                                                                                    | Umri/<br>8888=DK                                                                                                 | Jinsia                                                                                                                                                                                                                                                                                                                                                                           | Uhusiano    | Kiwango cha juu cha elimu alichofikia                                                                                        | Je, anasoma?<br>[If < age 21] | Je, wamefanya kazi kwa ajili ya kulipwa,mwezi ulio pita? [If parent/guardian] |  |                                                                                                                                                        |
|                                                                                                                                                                                                                                                                                                                                                         |                                                                                                                  | F M<br>1 2                                                                                                                                                                                                                                                                                                                                                                       |             |                                                                                                                              | YES NO<br>1 2                 | YES NO DON'T KNOW<br>1 2 88                                                   |  |                                                                                                                                                        |
|                                                                                                                                                                                                                                                                                                                                                         |                                                                                                                  | 1 2                                                                                                                                                                                                                                                                                                                                                                              |             |                                                                                                                              | 1 2                           | 1 2 88                                                                        |  |                                                                                                                                                        |
|                                                                                                                                                                                                                                                                                                                                                         |                                                                                                                  | 1 2                                                                                                                                                                                                                                                                                                                                                                              |             |                                                                                                                              | 1 2                           | 1 2 88                                                                        |  |                                                                                                                                                        |
|                                                                                                                                                                                                                                                                                                                                                         |                                                                                                                  | 1 2                                                                                                                                                                                                                                                                                                                                                                              |             |                                                                                                                              | 1 2                           | 1 2 88                                                                        |  |                                                                                                                                                        |
|                                                                                                                                                                                                                                                                                                                                                         |                                                                                                                  | 1 2                                                                                                                                                                                                                                                                                                                                                                              |             |                                                                                                                              | 1 2                           | 1 2 88                                                                        |  |                                                                                                                                                        |
|                                                                                                                                                                                                                                                                                                                                                         |                                                                                                                  | 1 2                                                                                                                                                                                                                                                                                                                                                                              |             |                                                                                                                              | 1 2                           | 1 2 88                                                                        |  |                                                                                                                                                        |
|                                                                                                                                                                                                                                                                                                                                                         |                                                                                                                  | 1 2                                                                                                                                                                                                                                                                                                                                                                              |             |                                                                                                                              | 1 2                           | 1 2 88                                                                        |  |                                                                                                                                                        |
|                                                                                                                                                                                                                                                                                                                                                         |                                                                                                                  | 1 2                                                                                                                                                                                                                                                                                                                                                                              |             |                                                                                                                              | 1 2                           | 1 2 88                                                                        |  |                                                                                                                                                        |
| <b>CODES 122e</b><br>1 NO EDUCATION<br>2 NURSERY SCHOOL<br>3 PRIMARY SCHOOL<br>4 SECONDARY SCHOOL<br>5 VOCATIONAL/TECHNICAL TRAINING<br>6 COLLEGE/ UNIVERSITY<br>7 NON-FORMAL SCHOOL<br># DON'T KNOW                                                                                                                                                    |                                                                                                                  |                                                                                                                                                                                                                                                                                                                                                                                  |             | <b>CODES 122d:</b><br>0 Mother<br>1 Father<br>2 Brother<br>3 Sister<br>4 Grandmother<br>5 Grandfather<br>6 Cousin<br>88 Aunt |                               |                                                                               |  | 8 Uncle<br>9 Friend<br>10 Boyfriend/Husband<br>11 Own Child<br>12 Employer<br>13 Guardian<br>14 Niece/Nephew<br>15 Other relative<br>96 Other(SPECIFY) |
| Je, KUTA za nje za nyumba unayoishi zimejengwa na vifaa gani?                                                                                                                                                                                                                                                                                           | Matope 1<br>Simiti 2<br>Mabati 3<br>Mbao 4<br>MAWE 5<br>MATOFALI 6<br>Nyasi/Makuti 7<br>NYINGINE (TAJA) _____ 96 |                                                                                                                                                                                                                                                                                                                                                                                  |             |                                                                                                                              |                               |                                                                               |  |                                                                                                                                                        |
| Je, PAA ya nyumba unayoishi imejengwa na vifaa gani?                                                                                                                                                                                                                                                                                                    | Mabati 1<br>Plastiki 2                                                                                           |                                                                                                                                                                                                                                                                                                                                                                                  |             |                                                                                                                              |                               |                                                                               |  |                                                                                                                                                        |

|                                                                                                                                                                          | Mbao<br>Vigae<br>Makuti/Nyasi<br>NYINGINE (TAJA) _____                                                                                                                                                                                                             | 3<br>4<br>5<br>96                                                                                                                                                                                                                                                                                                                                                                                                                                                                                                                                                                                                                                                                                                                                                                                                                                                                                                                            |                                            |    |     |          |   |   |          |   |   |               |   |   |         |   |   |           |   |   |            |   |   |            |   |   |             |   |   |         |   |   |                     |   |   |           |   |   |                                    |   |   |                                        |   |   |          |   |   |                           |   |   |  |
|--------------------------------------------------------------------------------------------------------------------------------------------------------------------------|--------------------------------------------------------------------------------------------------------------------------------------------------------------------------------------------------------------------------------------------------------------------|----------------------------------------------------------------------------------------------------------------------------------------------------------------------------------------------------------------------------------------------------------------------------------------------------------------------------------------------------------------------------------------------------------------------------------------------------------------------------------------------------------------------------------------------------------------------------------------------------------------------------------------------------------------------------------------------------------------------------------------------------------------------------------------------------------------------------------------------------------------------------------------------------------------------------------------------|--------------------------------------------|----|-----|----------|---|---|----------|---|---|---------------|---|---|---------|---|---|-----------|---|---|------------|---|---|------------|---|---|-------------|---|---|---------|---|---|---------------------|---|---|-----------|---|---|------------------------------------|---|---|----------------------------------------|---|---|----------|---|---|---------------------------|---|---|--|
| Je, SAKAFU ya nyumba unayoishi imejengwa na nini?                                                                                                                        | Matope<br>Simiti<br>Mbao / simiti na imefunikwa<br>NYINGINE (TAJA) _____                                                                                                                                                                                           | 1<br>2<br>3<br>96                                                                                                                                                                                                                                                                                                                                                                                                                                                                                                                                                                                                                                                                                                                                                                                                                                                                                                                            |                                            |    |     |          |   |   |          |   |   |               |   |   |         |   |   |           |   |   |            |   |   |            |   |   |             |   |   |         |   |   |                     |   |   |           |   |   |                                    |   |   |                                        |   |   |          |   |   |                           |   |   |  |
| Je, maji mnyokunywa nyumbani kwenu yanatoka wapi?                                                                                                                        | Maji hadi kwa ploti / nyumbani<br>Mfereji wa maji ya bure<br>Maji ya mfereji yanayouzwa<br>Maji ya kisima yanayouzwa<br>Kisima kwenye ploti / nyumbani<br>Kisima cha kila mtu<br>Mto / Kijito / Ziwa la maji<br>Maji ya mvua<br>Mchuuzi wa maji<br>NYINGINE (TAJA) | 1<br>2<br>3<br>4<br>5<br>6<br>7<br>8<br>96                                                                                                                                                                                                                                                                                                                                                                                                                                                                                                                                                                                                                                                                                                                                                                                                                                                                                                   | 130<br><br><br><br><br><br><br><br><br>130 |    |     |          |   |   |          |   |   |               |   |   |         |   |   |           |   |   |            |   |   |            |   |   |             |   |   |         |   |   |                     |   |   |           |   |   |                                    |   |   |                                        |   |   |          |   |   |                           |   |   |  |
| Maji hupatikana wapi?                                                                                                                                                    | Translate options to swahili<br>IN OWN DWELLING<br>IN OWN YARD/PLOT<br>ELSEWHERE                                                                                                                                                                                   | 1<br>2<br>3                                                                                                                                                                                                                                                                                                                                                                                                                                                                                                                                                                                                                                                                                                                                                                                                                                                                                                                                  | 130<br>130                                 |    |     |          |   |   |          |   |   |               |   |   |         |   |   |           |   |   |            |   |   |            |   |   |             |   |   |         |   |   |                     |   |   |           |   |   |                                    |   |   |                                        |   |   |          |   |   |                           |   |   |  |
| Je, inachukuwa muda gani kwenda na kurudi kutoka mahali pa kuteka maji?                                                                                                  | a. HOURS [0-8] <input type="text"/><br>b. MINUTES [0-480] <input type="text"/><br>DON'T KNOW                                                                                                                                                                       | <br><br>88                                                                                                                                                                                                                                                                                                                                                                                                                                                                                                                                                                                                                                                                                                                                                                                                                                                                                                                                   |                                            |    |     |          |   |   |          |   |   |               |   |   |         |   |   |           |   |   |            |   |   |            |   |   |             |   |   |         |   |   |                     |   |   |           |   |   |                                    |   |   |                                        |   |   |          |   |   |                           |   |   |  |
| Kwa kawaida ni nani huenda kuwachotea maji watu wa nyumbani kwenu?                                                                                                       | SELF<br>ADULT WOMAN<br>ADULT MAN<br>OTHER FEMALE CHILD UNDER 15 YEARS OLD<br>MALE CHILD UNDER 15 YEARS OLD<br>OTHER _____<br>SPECIFY                                                                                                                               | 1<br>2<br>3<br>4<br>5<br>96                                                                                                                                                                                                                                                                                                                                                                                                                                                                                                                                                                                                                                                                                                                                                                                                                                                                                                                  |                                            |    |     |          |   |   |          |   |   |               |   |   |         |   |   |           |   |   |            |   |   |            |   |   |             |   |   |         |   |   |                     |   |   |           |   |   |                                    |   |   |                                        |   |   |          |   |   |                           |   |   |  |
| Je, kwenu nyumbani kuna choo aina gani?                                                                                                                                  | FLUSH TOILET<br>VENTILATED PIT LATRINE<br>UNVENTILATED PIT LATRINE<br>NO FACILITY/BUSH/FIELD<br>POUR FLUSH<br>OTHER _____<br>SPECIFY                                                                                                                               | 1<br>2<br>3<br>4<br>5<br>98                                                                                                                                                                                                                                                                                                                                                                                                                                                                                                                                                                                                                                                                                                                                                                                                                                                                                                                  | 133                                        |    |     |          |   |   |          |   |   |               |   |   |         |   |   |           |   |   |            |   |   |            |   |   |             |   |   |         |   |   |                     |   |   |           |   |   |                                    |   |   |                                        |   |   |          |   |   |                           |   |   |  |
| Je mnatumia choo moja na nyumba nyinginezo?                                                                                                                              | YES<br>NO                                                                                                                                                                                                                                                          | 1<br>2                                                                                                                                                                                                                                                                                                                                                                                                                                                                                                                                                                                                                                                                                                                                                                                                                                                                                                                                       | 133                                        |    |     |          |   |   |          |   |   |               |   |   |         |   |   |           |   |   |            |   |   |            |   |   |             |   |   |         |   |   |                     |   |   |           |   |   |                                    |   |   |                                        |   |   |          |   |   |                           |   |   |  |
| Ni nyumba ngapi hutumia choo hiki?                                                                                                                                       | NO. OF HOUSEHOLDS<br>IF LESS THAN 10 <input type="text"/><br>10 OR MORE HOUSEHOLDS<br>DON'T KNOW                                                                                                                                                                   | 95<br>88                                                                                                                                                                                                                                                                                                                                                                                                                                                                                                                                                                                                                                                                                                                                                                                                                                                                                                                                     |                                            |    |     |          |   |   |          |   |   |               |   |   |         |   |   |           |   |   |            |   |   |            |   |   |             |   |   |         |   |   |                     |   |   |           |   |   |                                    |   |   |                                        |   |   |          |   |   |                           |   |   |  |
| Je, kuna vyumba vingapi vinavyo tumika kwa kulala katika nyumba yenu?                                                                                                    | NUMBER OF ROOMS <input type="text"/>                                                                                                                                                                                                                               |                                                                                                                                                                                                                                                                                                                                                                                                                                                                                                                                                                                                                                                                                                                                                                                                                                                                                                                                              |                                            |    |     |          |   |   |          |   |   |               |   |   |         |   |   |           |   |   |            |   |   |            |   |   |             |   |   |         |   |   |                     |   |   |           |   |   |                                    |   |   |                                        |   |   |          |   |   |                           |   |   |  |
| Kando na wewe, ni watu wangapi wengine, mnalala chumba kimoja?                                                                                                           | NUMBER OF MALES<br>NUMBER OF FEMALES <input type="text"/>                                                                                                                                                                                                          |                                                                                                                                                                                                                                                                                                                                                                                                                                                                                                                                                                                                                                                                                                                                                                                                                                                                                                                                              |                                            |    |     |          |   |   |          |   |   |               |   |   |         |   |   |           |   |   |            |   |   |            |   |   |             |   |   |         |   |   |                     |   |   |           |   |   |                                    |   |   |                                        |   |   |          |   |   |                           |   |   |  |
| Katika mwezi mmoja uliopita, je, kuna siku yoyote ambapo ulikosa chakula kwa sababu hakukuwa na chakula cha kutosha nyumbani?                                            | YES<br>NO                                                                                                                                                                                                                                                          | 1<br>2                                                                                                                                                                                                                                                                                                                                                                                                                                                                                                                                                                                                                                                                                                                                                                                                                                                                                                                                       |                                            |    |     |          |   |   |          |   |   |               |   |   |         |   |   |           |   |   |            |   |   |            |   |   |             |   |   |         |   |   |                     |   |   |           |   |   |                                    |   |   |                                        |   |   |          |   |   |                           |   |   |  |
| <b>READ RESPONSE OPTIONS</b><br>Sasa, nataka nikuulize kuhusu vitu ambavyo mnaweza kuwa navyo au msiwenavyo katika nyumba yenu.<br>Je, watu mnaoishi nao wana vitu hivi? |                                                                                                                                                                                                                                                                    | <table border="1"> <thead> <tr> <th></th> <th>NO</th> <th>YES</th> </tr> </thead> <tbody> <tr><td>A. STIMA</td><td>1</td><td>2</td></tr> <tr><td>B. RADIO</td><td>1</td><td>2</td></tr> <tr><td>C. RUNINGA/TV</td><td>1</td><td>2</td></tr> <tr><td>D. SIMU</td><td>1</td><td>2</td></tr> <tr><td>E. TAA YA</td><td>1</td><td>2</td></tr> <tr><td>F. KITANDA</td><td>1</td><td>2</td></tr> <tr><td>G. BAIKELI</td><td>1</td><td>2</td></tr> <tr><td>H. PIKIPIKI</td><td>1</td><td>2</td></tr> <tr><td>I. GARI</td><td>1</td><td>2</td></tr> <tr><td>J. NYUMBA UNAYOISHI</td><td>1</td><td>2</td></tr> <tr><td>K. SHAMBA</td><td>1</td><td>2</td></tr> <tr><td>L. MIFUGO NDOGO (I.E. KUKU, MBUZI)</td><td>1</td><td>2</td></tr> <tr><td>M. MIFUGO KUBWA (I.E. NGOMBE, NGURUWE)</td><td>1</td><td>2</td></tr> <tr><td>N. FRIJI</td><td>1</td><td>2</td></tr> <tr><td>O. MITAMBO YA KULETA PESA</td><td>1</td><td>2</td></tr> </tbody> </table> |                                            | NO | YES | A. STIMA | 1 | 2 | B. RADIO | 1 | 2 | C. RUNINGA/TV | 1 | 2 | D. SIMU | 1 | 2 | E. TAA YA | 1 | 2 | F. KITANDA | 1 | 2 | G. BAIKELI | 1 | 2 | H. PIKIPIKI | 1 | 2 | I. GARI | 1 | 2 | J. NYUMBA UNAYOISHI | 1 | 2 | K. SHAMBA | 1 | 2 | L. MIFUGO NDOGO (I.E. KUKU, MBUZI) | 1 | 2 | M. MIFUGO KUBWA (I.E. NGOMBE, NGURUWE) | 1 | 2 | N. FRIJI | 1 | 2 | O. MITAMBO YA KULETA PESA | 1 | 2 |  |
|                                                                                                                                                                          | NO                                                                                                                                                                                                                                                                 | YES                                                                                                                                                                                                                                                                                                                                                                                                                                                                                                                                                                                                                                                                                                                                                                                                                                                                                                                                          |                                            |    |     |          |   |   |          |   |   |               |   |   |         |   |   |           |   |   |            |   |   |            |   |   |             |   |   |         |   |   |                     |   |   |           |   |   |                                    |   |   |                                        |   |   |          |   |   |                           |   |   |  |
| A. STIMA                                                                                                                                                                 | 1                                                                                                                                                                                                                                                                  | 2                                                                                                                                                                                                                                                                                                                                                                                                                                                                                                                                                                                                                                                                                                                                                                                                                                                                                                                                            |                                            |    |     |          |   |   |          |   |   |               |   |   |         |   |   |           |   |   |            |   |   |            |   |   |             |   |   |         |   |   |                     |   |   |           |   |   |                                    |   |   |                                        |   |   |          |   |   |                           |   |   |  |
| B. RADIO                                                                                                                                                                 | 1                                                                                                                                                                                                                                                                  | 2                                                                                                                                                                                                                                                                                                                                                                                                                                                                                                                                                                                                                                                                                                                                                                                                                                                                                                                                            |                                            |    |     |          |   |   |          |   |   |               |   |   |         |   |   |           |   |   |            |   |   |            |   |   |             |   |   |         |   |   |                     |   |   |           |   |   |                                    |   |   |                                        |   |   |          |   |   |                           |   |   |  |
| C. RUNINGA/TV                                                                                                                                                            | 1                                                                                                                                                                                                                                                                  | 2                                                                                                                                                                                                                                                                                                                                                                                                                                                                                                                                                                                                                                                                                                                                                                                                                                                                                                                                            |                                            |    |     |          |   |   |          |   |   |               |   |   |         |   |   |           |   |   |            |   |   |            |   |   |             |   |   |         |   |   |                     |   |   |           |   |   |                                    |   |   |                                        |   |   |          |   |   |                           |   |   |  |
| D. SIMU                                                                                                                                                                  | 1                                                                                                                                                                                                                                                                  | 2                                                                                                                                                                                                                                                                                                                                                                                                                                                                                                                                                                                                                                                                                                                                                                                                                                                                                                                                            |                                            |    |     |          |   |   |          |   |   |               |   |   |         |   |   |           |   |   |            |   |   |            |   |   |             |   |   |         |   |   |                     |   |   |           |   |   |                                    |   |   |                                        |   |   |          |   |   |                           |   |   |  |
| E. TAA YA                                                                                                                                                                | 1                                                                                                                                                                                                                                                                  | 2                                                                                                                                                                                                                                                                                                                                                                                                                                                                                                                                                                                                                                                                                                                                                                                                                                                                                                                                            |                                            |    |     |          |   |   |          |   |   |               |   |   |         |   |   |           |   |   |            |   |   |            |   |   |             |   |   |         |   |   |                     |   |   |           |   |   |                                    |   |   |                                        |   |   |          |   |   |                           |   |   |  |
| F. KITANDA                                                                                                                                                               | 1                                                                                                                                                                                                                                                                  | 2                                                                                                                                                                                                                                                                                                                                                                                                                                                                                                                                                                                                                                                                                                                                                                                                                                                                                                                                            |                                            |    |     |          |   |   |          |   |   |               |   |   |         |   |   |           |   |   |            |   |   |            |   |   |             |   |   |         |   |   |                     |   |   |           |   |   |                                    |   |   |                                        |   |   |          |   |   |                           |   |   |  |
| G. BAIKELI                                                                                                                                                               | 1                                                                                                                                                                                                                                                                  | 2                                                                                                                                                                                                                                                                                                                                                                                                                                                                                                                                                                                                                                                                                                                                                                                                                                                                                                                                            |                                            |    |     |          |   |   |          |   |   |               |   |   |         |   |   |           |   |   |            |   |   |            |   |   |             |   |   |         |   |   |                     |   |   |           |   |   |                                    |   |   |                                        |   |   |          |   |   |                           |   |   |  |
| H. PIKIPIKI                                                                                                                                                              | 1                                                                                                                                                                                                                                                                  | 2                                                                                                                                                                                                                                                                                                                                                                                                                                                                                                                                                                                                                                                                                                                                                                                                                                                                                                                                            |                                            |    |     |          |   |   |          |   |   |               |   |   |         |   |   |           |   |   |            |   |   |            |   |   |             |   |   |         |   |   |                     |   |   |           |   |   |                                    |   |   |                                        |   |   |          |   |   |                           |   |   |  |
| I. GARI                                                                                                                                                                  | 1                                                                                                                                                                                                                                                                  | 2                                                                                                                                                                                                                                                                                                                                                                                                                                                                                                                                                                                                                                                                                                                                                                                                                                                                                                                                            |                                            |    |     |          |   |   |          |   |   |               |   |   |         |   |   |           |   |   |            |   |   |            |   |   |             |   |   |         |   |   |                     |   |   |           |   |   |                                    |   |   |                                        |   |   |          |   |   |                           |   |   |  |
| J. NYUMBA UNAYOISHI                                                                                                                                                      | 1                                                                                                                                                                                                                                                                  | 2                                                                                                                                                                                                                                                                                                                                                                                                                                                                                                                                                                                                                                                                                                                                                                                                                                                                                                                                            |                                            |    |     |          |   |   |          |   |   |               |   |   |         |   |   |           |   |   |            |   |   |            |   |   |             |   |   |         |   |   |                     |   |   |           |   |   |                                    |   |   |                                        |   |   |          |   |   |                           |   |   |  |
| K. SHAMBA                                                                                                                                                                | 1                                                                                                                                                                                                                                                                  | 2                                                                                                                                                                                                                                                                                                                                                                                                                                                                                                                                                                                                                                                                                                                                                                                                                                                                                                                                            |                                            |    |     |          |   |   |          |   |   |               |   |   |         |   |   |           |   |   |            |   |   |            |   |   |             |   |   |         |   |   |                     |   |   |           |   |   |                                    |   |   |                                        |   |   |          |   |   |                           |   |   |  |
| L. MIFUGO NDOGO (I.E. KUKU, MBUZI)                                                                                                                                       | 1                                                                                                                                                                                                                                                                  | 2                                                                                                                                                                                                                                                                                                                                                                                                                                                                                                                                                                                                                                                                                                                                                                                                                                                                                                                                            |                                            |    |     |          |   |   |          |   |   |               |   |   |         |   |   |           |   |   |            |   |   |            |   |   |             |   |   |         |   |   |                     |   |   |           |   |   |                                    |   |   |                                        |   |   |          |   |   |                           |   |   |  |
| M. MIFUGO KUBWA (I.E. NGOMBE, NGURUWE)                                                                                                                                   | 1                                                                                                                                                                                                                                                                  | 2                                                                                                                                                                                                                                                                                                                                                                                                                                                                                                                                                                                                                                                                                                                                                                                                                                                                                                                                            |                                            |    |     |          |   |   |          |   |   |               |   |   |         |   |   |           |   |   |            |   |   |            |   |   |             |   |   |         |   |   |                     |   |   |           |   |   |                                    |   |   |                                        |   |   |          |   |   |                           |   |   |  |
| N. FRIJI                                                                                                                                                                 | 1                                                                                                                                                                                                                                                                  | 2                                                                                                                                                                                                                                                                                                                                                                                                                                                                                                                                                                                                                                                                                                                                                                                                                                                                                                                                            |                                            |    |     |          |   |   |          |   |   |               |   |   |         |   |   |           |   |   |            |   |   |            |   |   |             |   |   |         |   |   |                     |   |   |           |   |   |                                    |   |   |                                        |   |   |          |   |   |                           |   |   |  |
| O. MITAMBO YA KULETA PESA                                                                                                                                                | 1                                                                                                                                                                                                                                                                  | 2                                                                                                                                                                                                                                                                                                                                                                                                                                                                                                                                                                                                                                                                                                                                                                                                                                                                                                                                            |                                            |    |     |          |   |   |          |   |   |               |   |   |         |   |   |           |   |   |            |   |   |            |   |   |             |   |   |         |   |   |                     |   |   |           |   |   |                                    |   |   |                                        |   |   |          |   |   |                           |   |   |  |

| P. PETE, USHANGA                                                                                                                                        |                                                                                                                                                                            | 1                           | 2                                                                                                                                                                                                                                                                                                                                                                    |                          |
|---------------------------------------------------------------------------------------------------------------------------------------------------------|----------------------------------------------------------------------------------------------------------------------------------------------------------------------------|-----------------------------|----------------------------------------------------------------------------------------------------------------------------------------------------------------------------------------------------------------------------------------------------------------------------------------------------------------------------------------------------------------------|--------------------------|
| <b>SECTION 2: USE OF SKILLS</b>                                                                                                                         |                                                                                                                                                                            |                             |                                                                                                                                                                                                                                                                                                                                                                      |                          |
| Katika maisha yako ya kila siku, wewe husoma mara nyingi kiasi gani kikawaida habari nyinginezo zilizoandikwa? Magazeti,<br><br>[READ RESPONSE OPTIONS] | KARIBU KILA SIKU<br>ANGALAU MARA MOJA KWA WIKI<br>ANGALAU MARA MOJA KWA MWEZI<br>CHINI YA MARA MOJA KWA MWEZI<br>KAMWE                                                     | 1<br>2<br>3<br>4<br>5       |                                                                                                                                                                                                                                                                                                                                                                      |                          |
| Kwa kawaida katika maisha yako ya kila siku, wewe huandika chochote kiasi gani ?<br><br>[READ RESPONSE OPTIONS]                                         | KARIBU KILA SIKU<br>ANGALAU MARA MOJA KWA WIKI<br>ANGALAU MARA MOJA KWA MWEZI<br>CHINI YA MARA MOJA KWA MWEZI<br>KAMWE                                                     | 1<br>2<br>3<br>4<br>5       |                                                                                                                                                                                                                                                                                                                                                                      |                          |
| Katika maisha yako ya kila siku, kwa kawaida wewe huisikiliza redio mara nyingi kiasi gani ?<br><br>[READ RESPONSE OPTIONS]                             | KARIBU KILA SIKU<br>ANGALAU MARA MOJA KWA WIKI<br>ANGALAU MARA MOJA KWA MWEZI<br>CHINI YA MARA MOJA KWA MWEZI<br>HAPANA                                                    | 1<br>2<br>3<br>4<br>5       |                                                                                                                                                                                                                                                                                                                                                                      |                          |
| Katika maisha yako ya kila siku, kwa kawaida wewe hutazama televisheni mara nyingi kiasi gani ?<br><br>[READ RESPONSE OPTIONS]                          | KARIBU KILA SIKU<br>ANGALAU MARA MOJA KWA WIKI<br>ANGALAU MARA MOJA KWA MWEZI<br>CHINI YA MARA MOJA KWA MWEZI<br>HAPANA                                                    | 1<br>2<br>3<br>4<br>5       |                                                                                                                                                                                                                                                                                                                                                                      |                          |
| <b>SECTION 3: RESPONDENT'S SCHOOLING</b>                                                                                                                |                                                                                                                                                                            |                             |                                                                                                                                                                                                                                                                                                                                                                      |                          |
| <b>QUESTIONS</b>                                                                                                                                        |                                                                                                                                                                            | <b>RESPONSES</b>            |                                                                                                                                                                                                                                                                                                                                                                      |                          |
| Ulianza darasa la kwanza ukiwa na umri gani?                                                                                                            | AGE<br>[4-14]<br>DON'T KNOW                                                                                                                                                |                             | <input type="text"/> <input type="text"/>                                                                                                                                                                                                                                                                                                                            | 88                       |
| Je, umewahi kurudia darasa lolote shuleni?                                                                                                              | YES<br>NO                                                                                                                                                                  | 1<br>2                      |                                                                                                                                                                                                                                                                                                                                                                      | 304                      |
| Tafadhali niambie ulirudia darasa lipi na mara ngapi?<br><br>[READ RESPONSE OPTIONS]                                                                    | CLASS 1<br>CLASS 2<br>CLASS 3<br>CLASS 4<br>CLASS 5<br>CLASS 6<br>CLASS 7                                                                                                  |                             | Number of times Repeated<br><input type="text"/> <input type="text"/><br><input type="text"/> <input type="text"/><br>[1-5]<br>NONE | 88                       |
| Shule unayoenda inaitwaje?<br><br>Note: Pre-populated list                                                                                              | _____                                                                                                                                                                      |                             |                                                                                                                                                                                                                                                                                                                                                                      |                          |
| Je, wewe unaishi nyumbani au kwingineko kwenda shuleni?                                                                                                 | LIVE AT HOME<br>LIVE SOMEWHERE ELSE                                                                                                                                        | 1<br>2                      |                                                                                                                                                                                                                                                                                                                                                                      |                          |
| Kwa kawaida ni mbinu gani huwa unatumia kufika shuleni?                                                                                                 | BY FOOT / WALKING<br>OWN BICYCLE/HOUSEHOLD BICYCLE<br>HIRED BICYCLE TAXI/BODA BODA<br>BUS/MATATU/MINIBUS/OTHER PUBLIC TRANSPORT<br>PRIVATE VEHICLE<br>OTHER (SPECIFY_____) | 1<br>2<br>3<br>4<br>5<br>98 |                                                                                                                                                                                                                                                                                                                                                                      | 308<br>308<br>308<br>308 |
| Kwa kawaida, wewe hulipa pesa ngapi kwa jumla kuenda shule na kurudi?                                                                                   | a. PER DAY<br>PER MONTH<br>PER TERM<br><br>b. KENYA SHILLINGS                                                                                                              | 1<br>2<br>3                 | <input type="text"/> <input type="text"/> <input type="text"/> <input type="text"/> <input type="text"/>                                                                                                                                                                                                                                                             |                          |



|                                                                                                                                                                                                                              |                                                                                                                                                                                                                                                                                                                                                     |                     |                               |
|------------------------------------------------------------------------------------------------------------------------------------------------------------------------------------------------------------------------------|-----------------------------------------------------------------------------------------------------------------------------------------------------------------------------------------------------------------------------------------------------------------------------------------------------------------------------------------------------|---------------------|-------------------------------|
|                                                                                                                                                                                                                              | <p>WAS SENT SOMEWHERE BY PARENTS/GUARDIAN 1 2</p> <p>UNIFORM DIRTY 1 2</p> <p>PROBLEMS WITH/AFRAID OF OTHER STUDENTS 1 2</p> <p>PROBLEMS WITH/AFRAID OF TEACHER 1 2</p> <p>MENSTRUATION 1 2</p> <p>WOULD RATHER DO SOMETHING ELSE 1 2</p> <p>WENT TO SEE/WAS WITH BOYFRIEND 1 2</p> <p>BEREAVEMENT/FUNERAL 1 2</p> <p>OTHER (SPECIFY _____) 1 2</p> |                     |                               |
| Kama nyingine, tafadhali eleza _____                                                                                                                                                                                         |                                                                                                                                                                                                                                                                                                                                                     |                     |                               |
| <p><b>School Engagement and Participation</b> Sasa ningependa kukuuliza kuhusu kushiriki kwako na kuwa na haja na shule. Katika maswali haya tungependa utueleze kama unakubaliana au haukubaliani na taarifa zifuatazo.</p> |                                                                                                                                                                                                                                                                                                                                                     |                     |                               |
| <b>[Read options 1 and 2 only]</b>                                                                                                                                                                                           | <b>UNAKUBALIANA</b>                                                                                                                                                                                                                                                                                                                                 | <b>HAUKUBALIANI</b> | <b>NO OPINION /DON'T KNOW</b> |
| a. Wewe huendi shuleni mara kwa mara. Je wewe.....                                                                                                                                                                           | 1                                                                                                                                                                                                                                                                                                                                                   | 2                   | 88                            |
| b. Wewe huwa makini darasani. Je wewe.....                                                                                                                                                                                   | 1                                                                                                                                                                                                                                                                                                                                                   | 2                   | 88                            |
| c. Ni nadra kwako kumaliza kazi unayopewa darasani. Je wewe.....                                                                                                                                                             | 1                                                                                                                                                                                                                                                                                                                                                   | 2                   | 88                            |
| d. Elimu sio muhimu kwako. Je wewe.....                                                                                                                                                                                      | 1                                                                                                                                                                                                                                                                                                                                                   | 2                   | 88                            |
| e. Wewe huwa unawaheshimu walimu wako. Je wewe.....                                                                                                                                                                          | 1                                                                                                                                                                                                                                                                                                                                                   | 2                   | 88                            |
| f. Hakuna mtu mzima shuleni ambaye unaweza kuzungumza naye ukiwa na shida. Je wewe.....                                                                                                                                      | 1                                                                                                                                                                                                                                                                                                                                                   | 2                   | 88                            |
| g. Wewe husoma nyumbani hata kama huna mtihani. Je wewe.....                                                                                                                                                                 | 1                                                                                                                                                                                                                                                                                                                                                   | 2                   | 88                            |
| h. Mwalimu wako hawezi tambua/kujua ukiwa hujenda shuleni. Je wewe.....                                                                                                                                                      | 1                                                                                                                                                                                                                                                                                                                                                   | 2                   | 88                            |
| i. Mara mingi huwa unahisi kuwa shule haifurahishi/inaboesha                                                                                                                                                                 | 1                                                                                                                                                                                                                                                                                                                                                   | 2                   | 88                            |
| <b>Schooling Competence</b>                                                                                                                                                                                                  |                                                                                                                                                                                                                                                                                                                                                     |                     |                               |
| j. Una kipaji cha kuelewa masomo yako vyema . Je wewe.....                                                                                                                                                                   | 1                                                                                                                                                                                                                                                                                                                                                   | 2                   | 88                            |
| k. Mara nyingi huwa huelewi mafunzo darasani. Je wewe.....                                                                                                                                                                   | 1                                                                                                                                                                                                                                                                                                                                                   | 2                   | 88                            |
| l. Ni vigumu kwako kumaliza kazi yako ya shule. Je wewe.....                                                                                                                                                                 | 1                                                                                                                                                                                                                                                                                                                                                   | 2                   | 88                            |
| m. Unajihisi sawa kushiriki darasani                                                                                                                                                                                         | 1                                                                                                                                                                                                                                                                                                                                                   | 2                   | 88                            |
| n. Huwa haujamini unapojibu maswali darasani                                                                                                                                                                                 | 1                                                                                                                                                                                                                                                                                                                                                   | 2                   | 88                            |
| o. Mara nyingi huwa ni vigumu kwako kuwa makini darasani                                                                                                                                                                     | 1                                                                                                                                                                                                                                                                                                                                                   | 2                   | 88                            |
| p. Wewe huwa unamaliza kazi yako ya shule kila mara                                                                                                                                                                          | 1                                                                                                                                                                                                                                                                                                                                                   | 2                   | 88                            |
| q. Unaamini ya kwamba unao uwezo wa kufanya vyema shuli                                                                                                                                                                      | 1                                                                                                                                                                                                                                                                                                                                                   | 2                   | 88                            |
| <b>Self Esteem</b>                                                                                                                                                                                                           |                                                                                                                                                                                                                                                                                                                                                     |                     |                               |
| r. Unaweza kufanya mambo mengi vizuri kama au kuliko wengine wa umri wako. Je wewe.....(-)                                                                                                                                   | 1                                                                                                                                                                                                                                                                                                                                                   | 2                   | 88                            |
| s. Maoni yako yanathaminiwa nyumbani kwenyu. Je wewe....                                                                                                                                                                     | 1                                                                                                                                                                                                                                                                                                                                                   | 2                   | 88                            |
| t. Watu hufikiria kwamba una sifa nyingi nzuri. Je wewe... (+)                                                                                                                                                               | 1                                                                                                                                                                                                                                                                                                                                                   | 2                   | 88                            |
| u. Huwezi kushughulikia au kufaulu kwa mambo mengi unayoyafanya. Je wewe... (-)                                                                                                                                              | 1                                                                                                                                                                                                                                                                                                                                                   | 2                   | 88                            |
| Je, mara nyingi mafanikio shuleni huletwa na nini? Talanta, bahati ama kufanya kazi kwa bidii?                                                                                                                               | <p>TALENT 1</p> <p>LUCK 2</p> <p>HARDWORK 3</p> <p>COMBINATION 4</p> <p>NO OPINION/DON'T KNOW 88</p>                                                                                                                                                                                                                                                |                     |                               |
| <b>Education and Schooling Experience</b>                                                                                                                                                                                    |                                                                                                                                                                                                                                                                                                                                                     |                     |                               |
| Nitasoma baadhi ya taarifa kuhusu elimu na masomo. Nataka uniambie ikiwa unakubaliana au hukubaliani na taarifa hiyo.                                                                                                        |                                                                                                                                                                                                                                                                                                                                                     |                     |                               |
|                                                                                                                                                                                                                              | DISAGREE                                                                                                                                                                                                                                                                                                                                            | 2                   |                               |
| a.Ni jambo muhimu kwa wasichana kumaliza shule ya upili sawa na lilivyo kwa wavulana kumaliza.                                                                                                                               | <p>AGREE 1</p> <p>DISAGREE 2</p>                                                                                                                                                                                                                                                                                                                    |                     |                               |
| b.Familia isipoweza kupeleka watoto wote shuleni, ni bora zaidi kuwapeleka wavulana kuliko wasichana.                                                                                                                        | <p>AGREE 1</p> <p>DISAGREE 2</p>                                                                                                                                                                                                                                                                                                                    |                     |                               |

|                                                                                                                                                                                                                                  |                                                                                                                                                                                                                                       |                                                              |                                                                                                  |
|----------------------------------------------------------------------------------------------------------------------------------------------------------------------------------------------------------------------------------|---------------------------------------------------------------------------------------------------------------------------------------------------------------------------------------------------------------------------------------|--------------------------------------------------------------|--------------------------------------------------------------------------------------------------|
| c. Msichana wa miaka 16 anapaswa aolewe akipata mwenzi afaaye, hata akiwa bado anakwenda shuleni.                                                                                                                                | AGREE<br>DISAGREE                                                                                                                                                                                                                     | 1<br>2                                                       |                                                                                                  |
| Sasa nitasoma baadhi ya taarifa kuhusu unayoyapitia kwa sasa kimasomo. Nataka uniambie ikiwa taarifa hiyo inakuhusu au inahusu yale unayoyapitia.                                                                                |                                                                                                                                                                                                                                       |                                                              |                                                                                                  |
|                                                                                                                                                                                                                                  |                                                                                                                                                                                                                                       | <b>YES</b>                                                   | <b>NO</b>                                                                                        |
| a. Walimu wako wengi wanawapendelea wavulana zaidi ya wasichana darasani                                                                                                                                                         |                                                                                                                                                                                                                                       | 1                                                            | 2 8                                                                                              |
| b. Kunaye na mwalimu wa kike shule ambaye anakuhimiza kufanye vyema shuleni.                                                                                                                                                     |                                                                                                                                                                                                                                       | 1                                                            | 2 8                                                                                              |
| c. Baba yako anakubali kwamba unastahili kwenda shule.                                                                                                                                                                           |                                                                                                                                                                                                                                       | 1                                                            | 2 8                                                                                              |
| d. Mama yako anakubali kwamba unastahili kwenda shule.                                                                                                                                                                           |                                                                                                                                                                                                                                       | 1                                                            | 2 8                                                                                              |
| e. Wakati mwingine una kazi nyingi za nyumbani hadi unakosa kumaliza kazi ya shule.                                                                                                                                              |                                                                                                                                                                                                                                       | 1                                                            | 2 8                                                                                              |
| Je, ni wakina nani huwa wanapokea maoni mengi mazuri kutoka kwa mwalimu wako wa darasa: wavulana, wasichana, au wanapokea maoni sawa?                                                                                            | NO POSITIVE COMMENTS MADE.....<br>BOYS.....<br>GIRLS.....<br>ABOUT THE SAME.....<br>DON'T KNOW.....                                                                                                                                   |                                                              | 0<br>1<br>2<br>3<br>88                                                                           |
| Je, ni wakina nani huwa wanapokea maoni mengi mabaya kutoka kwa mwalimu wako wa darasa: wavulana, wasichana, au wanapokea maoni sawa?                                                                                            | NO NEGATIVE COMMENTS MADE.....<br>BOYS.....<br>GIRLS.....<br>ABOUT THE SAME.....<br>DON'T KNOW.....                                                                                                                                   |                                                              | 0<br>1<br>2<br>3<br>88                                                                           |
| Je, umewahi kujifunza mafunzo ya kujikimu kimaisha /somo la maisha ya kijamii shuleni mwenu?                                                                                                                                     |                                                                                                                                                                                                                                       | Yes<br>No                                                    | 1<br>2<br><b>327</b>                                                                             |
| Katika mwaka uliopita (2016), kuna mwalimu wenu yeyote aliyewafunza masomo yoyote kati ya haya darasani?                                                                                                                         | MAWASILIANO<br>HADHI/KUJIAMI<br>UJAUZITO<br>KUBALEHE/JINSI WAVULANA NA WASICHANA WANAVY<br>HIV/AIDS<br>MAISHA YA NDOA/MAJUKUMU KATIKA FAMILIA<br>HEDHI<br>MPANGO WA UZAZI<br>KUEPUKANA NA NGONO<br>AFYA NA USAFI<br>INGINE (ELEZA)    | <b>YES</b><br>1<br>1<br>1<br>1<br>1<br>1<br>1<br>1<br>1<br>1 | <b>NO</b><br>2<br>2<br>2<br>2<br>2<br>2<br>2<br>2<br>2<br>2<br>98<br><b>If all 'NO':<br/>325</b> |
| Je, ni nani aliyefunza masomo hayo?<br><b>[READ LIST, CHECK ALL THAT APPLY]</b>                                                                                                                                                  | Mwalimu wa kiume<br>Mwalimu wa kike<br>Mshauri<br>INGINE (ELEZA)                                                                                                                                                                      | 1<br>1<br>1                                                  | 1<br>2<br>3<br>98                                                                                |
| Katika mwaka uliopita (2016), kando na walimu wenu, kuna mtu (mtu kutoka nje au shirika lisilo la kiserikali au shirika la kijamii) aliyewafunza masomo yoyote kati ya haya shuleni?<br><b>[READ LIST; CHECK ALL THAT APPLY]</b> | MAWASILIANO<br>HADHI/KUJIAMINI<br>UJAUZITO<br>KUBALEGHE/JINSI WAVULANA NA WASICHANA WANAVY<br>HIV/AIDS<br>MAISHA YA NDOA/MAJUKUMU KATIKA FAMILIA<br>HEDHI<br>MPANGO WA UZAZI<br>KUEPUKANA NA NGONO<br>AFYA NA USAFI<br>INGINE (ELEZA) | <b>YES</b><br>1<br>1<br>1<br>1<br>1<br>1<br>1<br>1<br>1      | <b>NO</b><br>2<br>2<br>2<br>2<br>2<br>2<br>2<br>2<br>2<br>98<br><b>If all 'NO':<br/>327</b>      |
| Je, waliwafunza masomo haya mara ngapi?                                                                                                                                                                                          | KILA WIKI<br>ANGALAU MARA MBILI KWA MWEZI<br>MARAJOJA AU MBILI KWA MUHULA<br>MARACHACHE                                                                                                                                               |                                                              | 1<br>2<br>4<br>5                                                                                 |
| Je, ungependa kusoma hadi kiwango kipi cha juu zaidi?                                                                                                                                                                            | <b>DO NOT READ LIST</b><br>PRIMARY SCHOOL<br>SECONDARY SCHOOL<br>PRE - SECONDARY VOCATIONAL/TECHNICAL TRAINING<br>POST-SECONDARY VOCATIONAL/TECHNICAL TRAINING<br>COLLEGE/UNIVERSITY                                                  |                                                              | 1<br>2<br>3<br>4<br>5                                                                            |
| Wakati mwingine watu huwa hawawezi kufika mbali kimasomo jinsi wangependa kwasababu nyingi. Je, unatarajia kusoma hadi kiwango kipi?                                                                                             | <b>DO NOT READ LIST</b><br>PRIMARY SCHOOL<br>SECONDARY SCHOOL<br>PRE - SECONDARY VOCATIONAL/TECHNICAL TRAINING<br>POST-SECONDARY VOCATIONAL/TECHNICAL TRAINING<br>COLLEGE/UNIVERSITY                                                  |                                                              | 1<br>2<br>3<br>4<br>5<br><b>401<br/>401<br/>401</b>                                              |
| Je, nini sababu kuu inayokufanya ufikirie kuwa hutamaliza shule ya t                                                                                                                                                             | <b>DO NOT READ LIST</b><br>EXPECT TO GET MARRIED<br>CURRENTLY PREGNANT                                                                                                                                                                |                                                              | 1<br>2                                                                                           |

|                                                         |                                                                                                                                                                                                                                                                                                                                                                                                     |                                                                                                               |                                          |     |                                          |      |
|---------------------------------------------------------|-----------------------------------------------------------------------------------------------------------------------------------------------------------------------------------------------------------------------------------------------------------------------------------------------------------------------------------------------------------------------------------------------------|---------------------------------------------------------------------------------------------------------------|------------------------------------------|-----|------------------------------------------|------|
|                                                         |                                                                                                                                                                                                                                                                                                                                                                                                     |                                                                                                               |                                          |     |                                          |      |
|                                                         |                                                                                                                                                                                                                                                                                                                                                                                                     |                                                                                                               | CAN'T PAY SCHOOL FEES                    |     | 3                                        |      |
|                                                         |                                                                                                                                                                                                                                                                                                                                                                                                     |                                                                                                               | CAN'T AFFORD UNIFORM                     |     | 4                                        |      |
|                                                         |                                                                                                                                                                                                                                                                                                                                                                                                     |                                                                                                               | PARENTS NOT SUPPORTIVE                   |     | 5                                        |      |
|                                                         |                                                                                                                                                                                                                                                                                                                                                                                                     |                                                                                                               | DOMESTIC RESPONSIBILITIES                |     | 6                                        |      |
|                                                         |                                                                                                                                                                                                                                                                                                                                                                                                     |                                                                                                               | DON'T EXPECT TO PASS KCPE EXAM           |     | 7                                        |      |
|                                                         |                                                                                                                                                                                                                                                                                                                                                                                                     |                                                                                                               | DON'T EXPECT TO GET A PLACE IN SECONDARY |     | 8                                        |      |
|                                                         |                                                                                                                                                                                                                                                                                                                                                                                                     |                                                                                                               | OTHER (SPECIFY _____)                    |     | 98                                       |      |
| <b>SECTION 4: WORK, SAVINGS, AND FINANCIAL LITERACY</b> |                                                                                                                                                                                                                                                                                                                                                                                                     |                                                                                                               |                                          |     |                                          |      |
| <b>QUESTIONS</b>                                        |                                                                                                                                                                                                                                                                                                                                                                                                     | <b>RESPONSES</b>                                                                                              |                                          |     |                                          |      |
|                                                         | Jana, ulitumia muda wa saa ngapi kufanya kazi za nyumbani, kama vile kupika, kusafisha, kufua nguo, kukusanya kuni, kuchota maji?<br><br>[IF YESTERDAY WAS FRIDAY, SATURDAY OR SUNDAY, ASK ABOUT THURSDAY]                                                                                                                                                                                          | a.                                                                                                            | HOURS [0-12]                             |     |                                          |      |
|                                                         |                                                                                                                                                                                                                                                                                                                                                                                                     | b.                                                                                                            | MINUTES [0-720]                          |     |                                          |      |
|                                                         |                                                                                                                                                                                                                                                                                                                                                                                                     |                                                                                                               | DON'T KNOW                               |     |                                          | 88   |
|                                                         | Mbali na kazi zako za nyumbani, umefanya kazi nyingine na ukalipwa kwa pesa taslimu au kwa njia nyingine (ukapewa kitu) katika mwezi mmoja uliopita?                                                                                                                                                                                                                                                | YES                                                                                                           |                                          |     |                                          | 405  |
|                                                         |                                                                                                                                                                                                                                                                                                                                                                                                     | NO                                                                                                            |                                          |     |                                          |      |
|                                                         | Kama ujuavyo, wasichana wengine hufanya kazi ili walipwe pesa taslimu au kwa njia nyingine. Wengine huuza vitu, wana biashara ndogo, au hufanya kazi kwenye shamba la familia au katika biashara ya familia. Ili tu kuhakikisha, <u>katika mwezi mmoja uliopita</u> , je, ulifanya kazi au shughuli zozote ukalipwa pesa taslimu au kwa njia nyingine (kwa mfano, kupewa chakula au mali nyingine)? | YES                                                                                                           |                                          |     | 1                                        | 405  |
|                                                         |                                                                                                                                                                                                                                                                                                                                                                                                     | NO                                                                                                            |                                          |     | 2                                        |      |
|                                                         | Katika mwaka mmoja uliopita, je, umefanya kazi au shughuli zozote mbali na kazi zako za nyumbani na ukalipwa pesa taslimu au kwa njia nyingine?                                                                                                                                                                                                                                                     | YES                                                                                                           |                                          |     | 1                                        | 407  |
|                                                         |                                                                                                                                                                                                                                                                                                                                                                                                     | NO                                                                                                            |                                          |     | 2                                        |      |
|                                                         | Ulikuwa na umri gani mara ya kwanza ulipofanya kazi au shughuli yoyote ya kulipwa, iwe ulilipwa pesa taslimu au kwa njia nyingine?                                                                                                                                                                                                                                                                  | AGE [4-20]                                                                                                    |                                          |     |                                          |      |
|                                                         |                                                                                                                                                                                                                                                                                                                                                                                                     | DON'T KNOW AGE                                                                                                |                                          |     |                                          | 88   |
|                                                         | Je, ni zipi kati ya shughuli au kazi zifuatazo ulizofanya na ukalipwa kwa pesa taslimu au kwa njia nyingine?<br><br>[READ ALL OPTIONS]                                                                                                                                                                                                                                                              |                                                                                                               |                                          | YES | NO                                       |      |
|                                                         |                                                                                                                                                                                                                                                                                                                                                                                                     | a.                                                                                                            | Kazi ya nyumbani                         | 1   | 2                                        |      |
|                                                         |                                                                                                                                                                                                                                                                                                                                                                                                     | b.                                                                                                            | Kufua nguo/vyombo/nyumba                 | 1   | 2                                        |      |
|                                                         |                                                                                                                                                                                                                                                                                                                                                                                                     | c.                                                                                                            | Kuchota maji                             | 1   | 2                                        |      |
|                                                         |                                                                                                                                                                                                                                                                                                                                                                                                     | d.                                                                                                            | Kusuka nywele/urembo                     | 1   | 2                                        |      |
|                                                         |                                                                                                                                                                                                                                                                                                                                                                                                     | e.                                                                                                            | Kutunza mtoto/uyaya                      | 1   | 2                                        |      |
|                                                         |                                                                                                                                                                                                                                                                                                                                                                                                     | f.                                                                                                            | kufanya kazi kwa mkahawa                 | 1   | 2                                        |      |
|                                                         |                                                                                                                                                                                                                                                                                                                                                                                                     | g.                                                                                                            | Kufanya kazi kwa shamba                  | 1   | 2                                        |      |
|                                                         |                                                                                                                                                                                                                                                                                                                                                                                                     | h.                                                                                                            | Kupakia chakula na vinywaji              | 1   | 2                                        |      |
|                                                         |                                                                                                                                                                                                                                                                                                                                                                                                     | i.                                                                                                            | kuzuza vitu                              | 1   | 2                                        |      |
|                                                         |                                                                                                                                                                                                                                                                                                                                                                                                     | j.                                                                                                            | Kufanya kazi ofisini                     | 1   | 2                                        |      |
|                                                         |                                                                                                                                                                                                                                                                                                                                                                                                     | k.                                                                                                            | Aina nyingine ya biashara za kibinafsi   | 1   | 2                                        |      |
|                                                         |                                                                                                                                                                                                                                                                                                                                                                                                     | k.                                                                                                            | Aina nyingine ya kazi za kibarua         | 1   | 2                                        |      |
|                                                         |                                                                                                                                                                                                                                                                                                                                                                                                     | l.                                                                                                            | Aina nyingine ya kazi ya kuajiriwa       | 1   | 2                                        |      |
|                                                         | Nataka kukuuliza kuhusu vitu ambavyo mtu anaweza kumiliki. Je, wewe binafsi unamiliki ama unavyo vitu hivi?<br><br>[READ LIST; IF 'YES' ASK 408]                                                                                                                                                                                                                                                    | <b>408</b>                                                                                                    |                                          |     |                                          |      |
|                                                         |                                                                                                                                                                                                                                                                                                                                                                                                     | Ni nani aliyekupa [ITEM], ni nani aliyekupa pesa za kununua kitu hicho, au ni nani aliyekununulia kitu hicho? |                                          |     |                                          |      |
|                                                         |                                                                                                                                                                                                                                                                                                                                                                                                     | <u>USE THE FOLLOWING CODES:</u><br>[DO NOT READ LIST]                                                         |                                          |     |                                          |      |
|                                                         |                                                                                                                                                                                                                                                                                                                                                                                                     |                                                                                                               |                                          |     |                                          | 1    |
|                                                         |                                                                                                                                                                                                                                                                                                                                                                                                     |                                                                                                               |                                          |     |                                          | 2    |
|                                                         |                                                                                                                                                                                                                                                                                                                                                                                                     |                                                                                                               |                                          |     |                                          | 3    |
|                                                         |                                                                                                                                                                                                                                                                                                                                                                                                     |                                                                                                               |                                          |     |                                          | 4    |
|                                                         |                                                                                                                                                                                                                                                                                                                                                                                                     |                                                                                                               |                                          |     |                                          | 5    |
|                                                         |                                                                                                                                                                                                                                                                                                                                                                                                     |                                                                                                               |                                          |     |                                          | 6    |
|                                                         |                                                                                                                                                                                                                                                                                                                                                                                                     |                                                                                                               |                                          |     |                                          | 7    |
|                                                         |                                                                                                                                                                                                                                                                                                                                                                                                     |                                                                                                               |                                          |     |                                          | 8    |
|                                                         |                                                                                                                                                                                                                                                                                                                                                                                                     |                                                                                                               |                                          |     |                                          | 9    |
|                                                         |                                                                                                                                                                                                                                                                                                                                                                                                     |                                                                                                               |                                          |     |                                          | 10   |
|                                                         |                                                                                                                                                                                                                                                                                                                                                                                                     |                                                                                                               |                                          |     |                                          | 11   |
|                                                         |                                                                                                                                                                                                                                                                                                                                                                                                     |                                                                                                               |                                          |     |                                          | 98   |
|                                                         |                                                                                                                                                                                                                                                                                                                                                                                                     | YES                                                                                                           | NO                                       |     |                                          | CODE |
|                                                         | a. JOZI LA VIATU                                                                                                                                                                                                                                                                                                                                                                                    | 1                                                                                                             | 2                                        | a.  | A PAIR OF SHOES                          |      |
|                                                         | b. SARE ZA SHULE                                                                                                                                                                                                                                                                                                                                                                                    | 1                                                                                                             | 2                                        | b.  | SCHOOL UNIFORM                           |      |
|                                                         | c. SETI MBILI ZA NGUO (OTHER THAN UNIFORM)                                                                                                                                                                                                                                                                                                                                                          | 1                                                                                                             | 2                                        | c.  | TWO SETS OF CLOTHES (OTHER THAN UNIFORM) |      |
|                                                         | d. NGUO MBILI ZA NDANI                                                                                                                                                                                                                                                                                                                                                                              | 1                                                                                                             | 2                                        | d.  | TWO UNDER WEARS                          |      |
|                                                         | e. MFUKO WA SHULE                                                                                                                                                                                                                                                                                                                                                                                   | 1                                                                                                             | 2                                        | e.  | A SCHOOL BAG                             |      |



|                         |   |   |                       |                          |                          |
|-------------------------|---|---|-----------------------|--------------------------|--------------------------|
| f. VITO                 | 1 | 2 | f. SOME JEWELRY       | <input type="checkbox"/> | <input type="checkbox"/> |
| g. SIMU YA MKONO/RUNUNU | 1 | 2 | g. A MOBILE TELEPHONE | <input type="checkbox"/> | <input type="checkbox"/> |

Sasa nitakuuliza maswali kadhaa kuhusu masuala tofauti-tofauti kuhusiana na pesa zozote ulizolipwa au kupewa, matumizi ya pesa za akiba. Tunajua kwamba wasichana wengine wana pesa za kutumia na za kuweka akiba na wengine hawana. Kwa hiyo hakuna majibu **yaliyo sawa** wala majibu **yasiyo sawa** wewe jibu tu kwa uaminifu kadiri uwezavyo.

|                                                                                                                                                     |     |   |     |
|-----------------------------------------------------------------------------------------------------------------------------------------------------|-----|---|-----|
| Katika mwaka mmoja uliopita, je, ulitumia pesa zozote kwa ajili ya mahitaji yako ya kila siku, mambo mengine tofauti-tofauti au gharama nyinginezo? | YES | 1 | 412 |
|                                                                                                                                                     | NO  | 2 |     |

|                                                                                                                                                                                                                     |                           |     |    |
|---------------------------------------------------------------------------------------------------------------------------------------------------------------------------------------------------------------------|---------------------------|-----|----|
| Katika mwaka mmoja uliyopita, ulipotumia pesa kwa ajili ya mahitaji yako ya kila siku, mambo mengine tofauti-tofauti au kwa gharama nyinginezo, ulipata pesa hizo kutoka wapi?<br><br><b>[RECORD ALL MENTIONED]</b> |                           | YES | NO |
|                                                                                                                                                                                                                     | a. MOTHER                 | 1   | 2  |
|                                                                                                                                                                                                                     | b. FATHER                 | 1   | 2  |
|                                                                                                                                                                                                                     | c. GUARDIAN YOU LIVE WITH | 1   | 2  |
|                                                                                                                                                                                                                     | d. OTHER RELATIVES        | 1   | 2  |
|                                                                                                                                                                                                                     | e. FRIEND                 | 1   | 2  |
|                                                                                                                                                                                                                     | f. BOYFRIEND              | 1   | 2  |
|                                                                                                                                                                                                                     | g. HUSBAND                | 1   | 2  |
|                                                                                                                                                                                                                     | h. SUGAR DADDY            | 1   | 2  |
|                                                                                                                                                                                                                     | i. STRETCHING MONEY       | 1   | 2  |
|                                                                                                                                                                                                                     | j. OWN SAVINGS            | 1   | 2  |
|                                                                                                                                                                                                                     | k. SAVINGS GROUP/CHAMA    | 1   | 2  |
|                                                                                                                                                                                                                     | l. CASUAL JOBS/CHORES     | 1   | 2  |
|                                                                                                                                                                                                                     | m. STEADY JOB             | 1   | 2  |
|                                                                                                                                                                                                                     | n. CASH TRANSFERS         | 1   | 2  |
|                                                                                                                                                                                                                     | o. SPONSOR                | 1   | 2  |
| p. OTHER (SPECIFY _____)                                                                                                                                                                                            | 1                         | 2   |    |

Katika MWEZI mmoja uliopita, ulitumia pesa kununua hiki kitu?

(READ EACH ITEM ALOUD. ASK YES OR NO)

(IF NO ON A, GO TO NEXT ITEM, SKIP B, C)

**NOTE: Clarify if it is a personal spending need or for someone else if it is not clear from the type of expenditure)**

|                                                                   | A.<br>MWEZI mmoja uliopita,<br>ulitumia pesa kununua<br>hii kitu? | B.<br>Ulitumia takriban<br>kiasi gani cha pesa kwa hii kitu<br>katika MWEZI<br>mmoja? | C.<br>Wewe mwenyewe hujiamulia kununua kitu<br>hiki, huamua<br>pamoja na mtu mwengine au mtu<br>mwengine hukuamulia? |
|-------------------------------------------------------------------|-------------------------------------------------------------------|---------------------------------------------------------------------------------------|----------------------------------------------------------------------------------------------------------------------|
|                                                                   |                                                                   | Ksh                                                                                   | 1 = YOU ALONE<br>2 = YOU TOGETHER WITH SOMEONE<br>3 = SOMEONE ELSE                                                   |
| a CHAKULA,<br>CHIPS,<br>PEREMENDE,VI<br>NYWAJI/SODA<br>ZAKO       | YES 1<br>NO 2                                                     |                                                                                       |                                                                                                                      |
| b CHAKULA,<br>CHIPS, PIPI,<br>VINYWAJI/SODA<br>ZA MTU<br>MWENGINE | YES 1<br>NO 2                                                     |                                                                                       |                                                                                                                      |
| c NGUO/VIATU<br>ZAKO                                              | YES 1<br>NO 2                                                     |                                                                                       |                                                                                                                      |
| d NGUO/VIATU ZA<br>MTU<br>MWENGINE                                | YES 1<br>NO 2                                                     |                                                                                       |                                                                                                                      |
| e TAULO YA<br>HEDHI                                               | YES 1<br>NO 2                                                     |                                                                                       |                                                                                                                      |
| f BIDHAA ZA<br>UREMBO/<br>HUDUMA YA<br>UREMBO                     | YES 1<br>NO 2                                                     |                                                                                       |                                                                                                                      |
| g CREDIT/AIRTIM<br>E                                              | YES 1<br>NO 2                                                     |                                                                                       |                                                                                                                      |

| h BURUDANI                                                                                                                                  | YES 1<br>NO 2                                                                                                                                                                                                                                                                                                                                                                                                                                                                                                                                                                                                                                                                                                                                                                                                                                                                                                                                                                                                                                                                                                                                                                                                                                                                                                                                                                                                                                                                                                                                                                                                                                                                                                                                                                                                                                                                                                                                                                     |                                                                                                                                                                                                                                                                                                                                |     |    |                    |   |   |                          |   |   |                         |   |   |                                             |   |   |                             |   |   |                    |   |   |                           |   |   |                        |   |   |                                      |   |   |                    |   |   |                             |   |   |                                   |   |    |                   |   |   |                         |   |   |  |
|---------------------------------------------------------------------------------------------------------------------------------------------|-----------------------------------------------------------------------------------------------------------------------------------------------------------------------------------------------------------------------------------------------------------------------------------------------------------------------------------------------------------------------------------------------------------------------------------------------------------------------------------------------------------------------------------------------------------------------------------------------------------------------------------------------------------------------------------------------------------------------------------------------------------------------------------------------------------------------------------------------------------------------------------------------------------------------------------------------------------------------------------------------------------------------------------------------------------------------------------------------------------------------------------------------------------------------------------------------------------------------------------------------------------------------------------------------------------------------------------------------------------------------------------------------------------------------------------------------------------------------------------------------------------------------------------------------------------------------------------------------------------------------------------------------------------------------------------------------------------------------------------------------------------------------------------------------------------------------------------------------------------------------------------------------------------------------------------------------------------------------------------|--------------------------------------------------------------------------------------------------------------------------------------------------------------------------------------------------------------------------------------------------------------------------------------------------------------------------------|-----|----|--------------------|---|---|--------------------------|---|---|-------------------------|---|---|---------------------------------------------|---|---|-----------------------------|---|---|--------------------|---|---|---------------------------|---|---|------------------------|---|---|--------------------------------------|---|---|--------------------|---|---|-----------------------------|---|---|-----------------------------------|---|----|-------------------|---|---|-------------------------|---|---|--|
| i USAFIRI                                                                                                                                   | YES 1<br>NO 2                                                                                                                                                                                                                                                                                                                                                                                                                                                                                                                                                                                                                                                                                                                                                                                                                                                                                                                                                                                                                                                                                                                                                                                                                                                                                                                                                                                                                                                                                                                                                                                                                                                                                                                                                                                                                                                                                                                                                                     |                                                                                                                                                                                                                                                                                                                                |     |    |                    |   |   |                          |   |   |                         |   |   |                                             |   |   |                             |   |   |                    |   |   |                           |   |   |                        |   |   |                                      |   |   |                    |   |   |                             |   |   |                                   |   |    |                   |   |   |                         |   |   |  |
| j KODI                                                                                                                                      | YES 1<br>NO 2                                                                                                                                                                                                                                                                                                                                                                                                                                                                                                                                                                                                                                                                                                                                                                                                                                                                                                                                                                                                                                                                                                                                                                                                                                                                                                                                                                                                                                                                                                                                                                                                                                                                                                                                                                                                                                                                                                                                                                     |                                                                                                                                                                                                                                                                                                                                |     |    |                    |   |   |                          |   |   |                         |   |   |                                             |   |   |                             |   |   |                    |   |   |                           |   |   |                        |   |   |                                      |   |   |                    |   |   |                             |   |   |                                   |   |    |                   |   |   |                         |   |   |  |
| Katika miezi sita iliyopita, je umeweka akiba ya pesa au umeweka pesa kando kwa matumizi ya baadaye?                                        | YES 1<br>NO 2                                                                                                                                                                                                                                                                                                                                                                                                                                                                                                                                                                                                                                                                                                                                                                                                                                                                                                                                                                                                                                                                                                                                                                                                                                                                                                                                                                                                                                                                                                                                                                                                                                                                                                                                                                                                                                                                                                                                                                     | 417                                                                                                                                                                                                                                                                                                                            |     |    |                    |   |   |                          |   |   |                         |   |   |                                             |   |   |                             |   |   |                    |   |   |                           |   |   |                        |   |   |                                      |   |   |                    |   |   |                             |   |   |                                   |   |    |                   |   |   |                         |   |   |  |
| Je unaweza kusema kwamba unajiweka akiba KILA WIKI, kwa kawaida, wakati mwingine, ama kamwe hujawahi?                                       | ALWAYS 1<br>USUALLY 2<br>SOMETIMES 3<br>NEVER 4                                                                                                                                                                                                                                                                                                                                                                                                                                                                                                                                                                                                                                                                                                                                                                                                                                                                                                                                                                                                                                                                                                                                                                                                                                                                                                                                                                                                                                                                                                                                                                                                                                                                                                                                                                                                                                                                                                                                   | 417                                                                                                                                                                                                                                                                                                                            |     |    |                    |   |   |                          |   |   |                         |   |   |                                             |   |   |                             |   |   |                    |   |   |                           |   |   |                        |   |   |                                      |   |   |                    |   |   |                             |   |   |                                   |   |    |                   |   |   |                         |   |   |  |
| Kwa jumla, umeweka akiba ya shilingi ngapi tayari?                                                                                          | KENYA SHILLINGS<br>DON'T KNOW                                                                                                                                                                                                                                                                                                                                                                                                                                                                                                                                                                                                                                                                                                                                                                                                                                                                                                                                                                                                                                                                                                                                                                                                                                                                                                                                                                                                                                                                                                                                                                                                                                                                                                                                                                                                                                                                                                                                                     | <table border="1" style="display: inline-table; vertical-align: middle;"> <tr> <td style="width: 20px; height: 20px;"></td> </tr> </table> |     |    |                    |   |   | 88888                    |   |   |                         |   |   |                                             |   |   |                             |   |   |                    |   |   |                           |   |   |                        |   |   |                                      |   |   |                    |   |   |                             |   |   |                                   |   |    |                   |   |   |                         |   |   |  |
|                                                                                                                                             |                                                                                                                                                                                                                                                                                                                                                                                                                                                                                                                                                                                                                                                                                                                                                                                                                                                                                                                                                                                                                                                                                                                                                                                                                                                                                                                                                                                                                                                                                                                                                                                                                                                                                                                                                                                                                                                                                                                                                                                   |                                                                                                                                                                                                                                                                                                                                |     |    |                    |   |   |                          |   |   |                         |   |   |                                             |   |   |                             |   |   |                    |   |   |                           |   |   |                        |   |   |                                      |   |   |                    |   |   |                             |   |   |                                   |   |    |                   |   |   |                         |   |   |  |
| Unaweka akiba ya pesa kwa ajili ya nini?<br><br>[DO NOT READ LIST]                                                                          | <table border="1" style="width: 100%; border-collapse: collapse;"> <thead> <tr> <th style="width: 70%;"></th> <th style="width: 15%; text-align: center;">YES</th> <th style="width: 15%; text-align: center;">NO</th> </tr> </thead> <tbody> <tr><td>a. HALI YA DHARURA</td><td style="text-align: center;">1</td><td style="text-align: center;">2</td></tr> <tr><td>b. VITU VYA KIBINAFSI</td><td style="text-align: center;">1</td><td style="text-align: center;">2</td></tr> <tr><td>c. GHARAMA ZA NYUMBANI</td><td style="text-align: center;">1</td><td style="text-align: center;">2</td></tr> <tr><td>d. KARO YAKO YA SHULE</td><td style="text-align: center;">1</td><td style="text-align: center;">2</td></tr> <tr><td>e. KARO YA SHULE YA WENGINE</td><td style="text-align: center;">1</td><td style="text-align: center;">2</td></tr> <tr><td>f. VIFAA VYA SHULE</td><td style="text-align: center;">1</td><td style="text-align: center;">2</td></tr> <tr><td>g. BIASHARA YAKO MWENYEWE</td><td style="text-align: center;">1</td><td style="text-align: center;">2</td></tr> <tr><td>h. BIASHARA YA FAMILIA</td><td style="text-align: center;">1</td><td style="text-align: center;">2</td></tr> <tr><td>i. MATUMIZI YA UJUMLA YA WAKATI UJAO</td><td style="text-align: center;">1</td><td style="text-align: center;">2</td></tr> <tr><td>j. UKULIMA</td><td style="text-align: center;">1</td><td style="text-align: center;">2</td></tr> <tr><td>k. GHARAMA ZAKO ZA MATIBABU</td><td style="text-align: center;">1</td><td style="text-align: center;">2</td></tr> <tr><td>l. GHARAMA ZA MATIBABU ZA WENGINE</td><td style="text-align: center;">1</td><td style="text-align: center;">2</td></tr> <tr><td>m. USAFIRI/SAFARI</td><td style="text-align: center;">1</td><td style="text-align: center;">2</td></tr> <tr><td>n. MENGINEO (TAJA_____)</td><td style="text-align: center;">1</td><td style="text-align: center;">2</td></tr> </tbody> </table> |                                                                                                                                                                                                                                                                                                                                | YES | NO | a. HALI YA DHARURA | 1 | 2 | b. VITU VYA KIBINAFSI    | 1 | 2 | c. GHARAMA ZA NYUMBANI  | 1 | 2 | d. KARO YAKO YA SHULE                       | 1 | 2 | e. KARO YA SHULE YA WENGINE | 1 | 2 | f. VIFAA VYA SHULE | 1 | 2 | g. BIASHARA YAKO MWENYEWE | 1 | 2 | h. BIASHARA YA FAMILIA | 1 | 2 | i. MATUMIZI YA UJUMLA YA WAKATI UJAO | 1 | 2 | j. UKULIMA         | 1 | 2 | k. GHARAMA ZAKO ZA MATIBABU | 1 | 2 | l. GHARAMA ZA MATIBABU ZA WENGINE | 1 | 2  | m. USAFIRI/SAFARI | 1 | 2 | n. MENGINEO (TAJA_____) | 1 | 2 |  |
|                                                                                                                                             | YES                                                                                                                                                                                                                                                                                                                                                                                                                                                                                                                                                                                                                                                                                                                                                                                                                                                                                                                                                                                                                                                                                                                                                                                                                                                                                                                                                                                                                                                                                                                                                                                                                                                                                                                                                                                                                                                                                                                                                                               | NO                                                                                                                                                                                                                                                                                                                             |     |    |                    |   |   |                          |   |   |                         |   |   |                                             |   |   |                             |   |   |                    |   |   |                           |   |   |                        |   |   |                                      |   |   |                    |   |   |                             |   |   |                                   |   |    |                   |   |   |                         |   |   |  |
| a. HALI YA DHARURA                                                                                                                          | 1                                                                                                                                                                                                                                                                                                                                                                                                                                                                                                                                                                                                                                                                                                                                                                                                                                                                                                                                                                                                                                                                                                                                                                                                                                                                                                                                                                                                                                                                                                                                                                                                                                                                                                                                                                                                                                                                                                                                                                                 | 2                                                                                                                                                                                                                                                                                                                              |     |    |                    |   |   |                          |   |   |                         |   |   |                                             |   |   |                             |   |   |                    |   |   |                           |   |   |                        |   |   |                                      |   |   |                    |   |   |                             |   |   |                                   |   |    |                   |   |   |                         |   |   |  |
| b. VITU VYA KIBINAFSI                                                                                                                       | 1                                                                                                                                                                                                                                                                                                                                                                                                                                                                                                                                                                                                                                                                                                                                                                                                                                                                                                                                                                                                                                                                                                                                                                                                                                                                                                                                                                                                                                                                                                                                                                                                                                                                                                                                                                                                                                                                                                                                                                                 | 2                                                                                                                                                                                                                                                                                                                              |     |    |                    |   |   |                          |   |   |                         |   |   |                                             |   |   |                             |   |   |                    |   |   |                           |   |   |                        |   |   |                                      |   |   |                    |   |   |                             |   |   |                                   |   |    |                   |   |   |                         |   |   |  |
| c. GHARAMA ZA NYUMBANI                                                                                                                      | 1                                                                                                                                                                                                                                                                                                                                                                                                                                                                                                                                                                                                                                                                                                                                                                                                                                                                                                                                                                                                                                                                                                                                                                                                                                                                                                                                                                                                                                                                                                                                                                                                                                                                                                                                                                                                                                                                                                                                                                                 | 2                                                                                                                                                                                                                                                                                                                              |     |    |                    |   |   |                          |   |   |                         |   |   |                                             |   |   |                             |   |   |                    |   |   |                           |   |   |                        |   |   |                                      |   |   |                    |   |   |                             |   |   |                                   |   |    |                   |   |   |                         |   |   |  |
| d. KARO YAKO YA SHULE                                                                                                                       | 1                                                                                                                                                                                                                                                                                                                                                                                                                                                                                                                                                                                                                                                                                                                                                                                                                                                                                                                                                                                                                                                                                                                                                                                                                                                                                                                                                                                                                                                                                                                                                                                                                                                                                                                                                                                                                                                                                                                                                                                 | 2                                                                                                                                                                                                                                                                                                                              |     |    |                    |   |   |                          |   |   |                         |   |   |                                             |   |   |                             |   |   |                    |   |   |                           |   |   |                        |   |   |                                      |   |   |                    |   |   |                             |   |   |                                   |   |    |                   |   |   |                         |   |   |  |
| e. KARO YA SHULE YA WENGINE                                                                                                                 | 1                                                                                                                                                                                                                                                                                                                                                                                                                                                                                                                                                                                                                                                                                                                                                                                                                                                                                                                                                                                                                                                                                                                                                                                                                                                                                                                                                                                                                                                                                                                                                                                                                                                                                                                                                                                                                                                                                                                                                                                 | 2                                                                                                                                                                                                                                                                                                                              |     |    |                    |   |   |                          |   |   |                         |   |   |                                             |   |   |                             |   |   |                    |   |   |                           |   |   |                        |   |   |                                      |   |   |                    |   |   |                             |   |   |                                   |   |    |                   |   |   |                         |   |   |  |
| f. VIFAA VYA SHULE                                                                                                                          | 1                                                                                                                                                                                                                                                                                                                                                                                                                                                                                                                                                                                                                                                                                                                                                                                                                                                                                                                                                                                                                                                                                                                                                                                                                                                                                                                                                                                                                                                                                                                                                                                                                                                                                                                                                                                                                                                                                                                                                                                 | 2                                                                                                                                                                                                                                                                                                                              |     |    |                    |   |   |                          |   |   |                         |   |   |                                             |   |   |                             |   |   |                    |   |   |                           |   |   |                        |   |   |                                      |   |   |                    |   |   |                             |   |   |                                   |   |    |                   |   |   |                         |   |   |  |
| g. BIASHARA YAKO MWENYEWE                                                                                                                   | 1                                                                                                                                                                                                                                                                                                                                                                                                                                                                                                                                                                                                                                                                                                                                                                                                                                                                                                                                                                                                                                                                                                                                                                                                                                                                                                                                                                                                                                                                                                                                                                                                                                                                                                                                                                                                                                                                                                                                                                                 | 2                                                                                                                                                                                                                                                                                                                              |     |    |                    |   |   |                          |   |   |                         |   |   |                                             |   |   |                             |   |   |                    |   |   |                           |   |   |                        |   |   |                                      |   |   |                    |   |   |                             |   |   |                                   |   |    |                   |   |   |                         |   |   |  |
| h. BIASHARA YA FAMILIA                                                                                                                      | 1                                                                                                                                                                                                                                                                                                                                                                                                                                                                                                                                                                                                                                                                                                                                                                                                                                                                                                                                                                                                                                                                                                                                                                                                                                                                                                                                                                                                                                                                                                                                                                                                                                                                                                                                                                                                                                                                                                                                                                                 | 2                                                                                                                                                                                                                                                                                                                              |     |    |                    |   |   |                          |   |   |                         |   |   |                                             |   |   |                             |   |   |                    |   |   |                           |   |   |                        |   |   |                                      |   |   |                    |   |   |                             |   |   |                                   |   |    |                   |   |   |                         |   |   |  |
| i. MATUMIZI YA UJUMLA YA WAKATI UJAO                                                                                                        | 1                                                                                                                                                                                                                                                                                                                                                                                                                                                                                                                                                                                                                                                                                                                                                                                                                                                                                                                                                                                                                                                                                                                                                                                                                                                                                                                                                                                                                                                                                                                                                                                                                                                                                                                                                                                                                                                                                                                                                                                 | 2                                                                                                                                                                                                                                                                                                                              |     |    |                    |   |   |                          |   |   |                         |   |   |                                             |   |   |                             |   |   |                    |   |   |                           |   |   |                        |   |   |                                      |   |   |                    |   |   |                             |   |   |                                   |   |    |                   |   |   |                         |   |   |  |
| j. UKULIMA                                                                                                                                  | 1                                                                                                                                                                                                                                                                                                                                                                                                                                                                                                                                                                                                                                                                                                                                                                                                                                                                                                                                                                                                                                                                                                                                                                                                                                                                                                                                                                                                                                                                                                                                                                                                                                                                                                                                                                                                                                                                                                                                                                                 | 2                                                                                                                                                                                                                                                                                                                              |     |    |                    |   |   |                          |   |   |                         |   |   |                                             |   |   |                             |   |   |                    |   |   |                           |   |   |                        |   |   |                                      |   |   |                    |   |   |                             |   |   |                                   |   |    |                   |   |   |                         |   |   |  |
| k. GHARAMA ZAKO ZA MATIBABU                                                                                                                 | 1                                                                                                                                                                                                                                                                                                                                                                                                                                                                                                                                                                                                                                                                                                                                                                                                                                                                                                                                                                                                                                                                                                                                                                                                                                                                                                                                                                                                                                                                                                                                                                                                                                                                                                                                                                                                                                                                                                                                                                                 | 2                                                                                                                                                                                                                                                                                                                              |     |    |                    |   |   |                          |   |   |                         |   |   |                                             |   |   |                             |   |   |                    |   |   |                           |   |   |                        |   |   |                                      |   |   |                    |   |   |                             |   |   |                                   |   |    |                   |   |   |                         |   |   |  |
| l. GHARAMA ZA MATIBABU ZA WENGINE                                                                                                           | 1                                                                                                                                                                                                                                                                                                                                                                                                                                                                                                                                                                                                                                                                                                                                                                                                                                                                                                                                                                                                                                                                                                                                                                                                                                                                                                                                                                                                                                                                                                                                                                                                                                                                                                                                                                                                                                                                                                                                                                                 | 2                                                                                                                                                                                                                                                                                                                              |     |    |                    |   |   |                          |   |   |                         |   |   |                                             |   |   |                             |   |   |                    |   |   |                           |   |   |                        |   |   |                                      |   |   |                    |   |   |                             |   |   |                                   |   |    |                   |   |   |                         |   |   |  |
| m. USAFIRI/SAFARI                                                                                                                           | 1                                                                                                                                                                                                                                                                                                                                                                                                                                                                                                                                                                                                                                                                                                                                                                                                                                                                                                                                                                                                                                                                                                                                                                                                                                                                                                                                                                                                                                                                                                                                                                                                                                                                                                                                                                                                                                                                                                                                                                                 | 2                                                                                                                                                                                                                                                                                                                              |     |    |                    |   |   |                          |   |   |                         |   |   |                                             |   |   |                             |   |   |                    |   |   |                           |   |   |                        |   |   |                                      |   |   |                    |   |   |                             |   |   |                                   |   |    |                   |   |   |                         |   |   |  |
| n. MENGINEO (TAJA_____)                                                                                                                     | 1                                                                                                                                                                                                                                                                                                                                                                                                                                                                                                                                                                                                                                                                                                                                                                                                                                                                                                                                                                                                                                                                                                                                                                                                                                                                                                                                                                                                                                                                                                                                                                                                                                                                                                                                                                                                                                                                                                                                                                                 | 2                                                                                                                                                                                                                                                                                                                              |     |    |                    |   |   |                          |   |   |                         |   |   |                                             |   |   |                             |   |   |                    |   |   |                           |   |   |                        |   |   |                                      |   |   |                    |   |   |                             |   |   |                                   |   |    |                   |   |   |                         |   |   |  |
| Katika miezi sita iliyopita, umeweka akiba yako pahali pepi kati ya palipotajwa hapa chini?                                                 | <table border="1" style="width: 100%; border-collapse: collapse;"> <thead> <tr> <th style="width: 70%;"></th> <th style="width: 15%; text-align: center;">YES</th> <th style="width: 15%; text-align: center;">NO</th> </tr> </thead> <tbody> <tr><td>READ ALL OPTIONS</td><td></td><td></td></tr> <tr><td>BANKI / ACCOUNT YA BENKI</td><td style="text-align: center;">1</td><td style="text-align: center;">2</td></tr> <tr><td>AKAUNTI YA KUWEKA AKIBA</td><td style="text-align: center;">1</td><td style="text-align: center;">2</td></tr> <tr><td>BENKI YA NYUMBANI/CHINI YA GODORO/KWA SHIMO</td><td style="text-align: center;">1</td><td style="text-align: center;">2</td></tr> <tr><td>KISANDUKU/KABATI</td><td style="text-align: center;">1</td><td style="text-align: center;">2</td></tr> <tr><td>NA RAFIKI</td><td style="text-align: center;">1</td><td style="text-align: center;">2</td></tr> <tr><td>NA MZAZI AU MLEZI</td><td style="text-align: center;">1</td><td style="text-align: center;">2</td></tr> <tr><td>CHAMA</td><td style="text-align: center;">1</td><td style="text-align: center;">2</td></tr> <tr><td>MWENYE DUKA</td><td style="text-align: center;">1</td><td style="text-align: center;">2</td></tr> <tr><td>UEKEZAJI WA KILIMO</td><td style="text-align: center;">1</td><td style="text-align: center;">2</td></tr> <tr><td>MPESA</td><td style="text-align: center;">1</td><td style="text-align: center;">2</td></tr> <tr><td>INGINE (ELEZA)</td><td></td><td style="text-align: center;">96</td></tr> </tbody> </table>                                                                                                                                                                                                                                                                                                                                                                                                            |                                                                                                                                                                                                                                                                                                                                | YES | NO | READ ALL OPTIONS   |   |   | BANKI / ACCOUNT YA BENKI | 1 | 2 | AKAUNTI YA KUWEKA AKIBA | 1 | 2 | BENKI YA NYUMBANI/CHINI YA GODORO/KWA SHIMO | 1 | 2 | KISANDUKU/KABATI            | 1 | 2 | NA RAFIKI          | 1 | 2 | NA MZAZI AU MLEZI         | 1 | 2 | CHAMA                  | 1 | 2 | MWENYE DUKA                          | 1 | 2 | UEKEZAJI WA KILIMO | 1 | 2 | MPESA                       | 1 | 2 | INGINE (ELEZA)                    |   | 96 |                   |   |   |                         |   |   |  |
|                                                                                                                                             | YES                                                                                                                                                                                                                                                                                                                                                                                                                                                                                                                                                                                                                                                                                                                                                                                                                                                                                                                                                                                                                                                                                                                                                                                                                                                                                                                                                                                                                                                                                                                                                                                                                                                                                                                                                                                                                                                                                                                                                                               | NO                                                                                                                                                                                                                                                                                                                             |     |    |                    |   |   |                          |   |   |                         |   |   |                                             |   |   |                             |   |   |                    |   |   |                           |   |   |                        |   |   |                                      |   |   |                    |   |   |                             |   |   |                                   |   |    |                   |   |   |                         |   |   |  |
| READ ALL OPTIONS                                                                                                                            |                                                                                                                                                                                                                                                                                                                                                                                                                                                                                                                                                                                                                                                                                                                                                                                                                                                                                                                                                                                                                                                                                                                                                                                                                                                                                                                                                                                                                                                                                                                                                                                                                                                                                                                                                                                                                                                                                                                                                                                   |                                                                                                                                                                                                                                                                                                                                |     |    |                    |   |   |                          |   |   |                         |   |   |                                             |   |   |                             |   |   |                    |   |   |                           |   |   |                        |   |   |                                      |   |   |                    |   |   |                             |   |   |                                   |   |    |                   |   |   |                         |   |   |  |
| BANKI / ACCOUNT YA BENKI                                                                                                                    | 1                                                                                                                                                                                                                                                                                                                                                                                                                                                                                                                                                                                                                                                                                                                                                                                                                                                                                                                                                                                                                                                                                                                                                                                                                                                                                                                                                                                                                                                                                                                                                                                                                                                                                                                                                                                                                                                                                                                                                                                 | 2                                                                                                                                                                                                                                                                                                                              |     |    |                    |   |   |                          |   |   |                         |   |   |                                             |   |   |                             |   |   |                    |   |   |                           |   |   |                        |   |   |                                      |   |   |                    |   |   |                             |   |   |                                   |   |    |                   |   |   |                         |   |   |  |
| AKAUNTI YA KUWEKA AKIBA                                                                                                                     | 1                                                                                                                                                                                                                                                                                                                                                                                                                                                                                                                                                                                                                                                                                                                                                                                                                                                                                                                                                                                                                                                                                                                                                                                                                                                                                                                                                                                                                                                                                                                                                                                                                                                                                                                                                                                                                                                                                                                                                                                 | 2                                                                                                                                                                                                                                                                                                                              |     |    |                    |   |   |                          |   |   |                         |   |   |                                             |   |   |                             |   |   |                    |   |   |                           |   |   |                        |   |   |                                      |   |   |                    |   |   |                             |   |   |                                   |   |    |                   |   |   |                         |   |   |  |
| BENKI YA NYUMBANI/CHINI YA GODORO/KWA SHIMO                                                                                                 | 1                                                                                                                                                                                                                                                                                                                                                                                                                                                                                                                                                                                                                                                                                                                                                                                                                                                                                                                                                                                                                                                                                                                                                                                                                                                                                                                                                                                                                                                                                                                                                                                                                                                                                                                                                                                                                                                                                                                                                                                 | 2                                                                                                                                                                                                                                                                                                                              |     |    |                    |   |   |                          |   |   |                         |   |   |                                             |   |   |                             |   |   |                    |   |   |                           |   |   |                        |   |   |                                      |   |   |                    |   |   |                             |   |   |                                   |   |    |                   |   |   |                         |   |   |  |
| KISANDUKU/KABATI                                                                                                                            | 1                                                                                                                                                                                                                                                                                                                                                                                                                                                                                                                                                                                                                                                                                                                                                                                                                                                                                                                                                                                                                                                                                                                                                                                                                                                                                                                                                                                                                                                                                                                                                                                                                                                                                                                                                                                                                                                                                                                                                                                 | 2                                                                                                                                                                                                                                                                                                                              |     |    |                    |   |   |                          |   |   |                         |   |   |                                             |   |   |                             |   |   |                    |   |   |                           |   |   |                        |   |   |                                      |   |   |                    |   |   |                             |   |   |                                   |   |    |                   |   |   |                         |   |   |  |
| NA RAFIKI                                                                                                                                   | 1                                                                                                                                                                                                                                                                                                                                                                                                                                                                                                                                                                                                                                                                                                                                                                                                                                                                                                                                                                                                                                                                                                                                                                                                                                                                                                                                                                                                                                                                                                                                                                                                                                                                                                                                                                                                                                                                                                                                                                                 | 2                                                                                                                                                                                                                                                                                                                              |     |    |                    |   |   |                          |   |   |                         |   |   |                                             |   |   |                             |   |   |                    |   |   |                           |   |   |                        |   |   |                                      |   |   |                    |   |   |                             |   |   |                                   |   |    |                   |   |   |                         |   |   |  |
| NA MZAZI AU MLEZI                                                                                                                           | 1                                                                                                                                                                                                                                                                                                                                                                                                                                                                                                                                                                                                                                                                                                                                                                                                                                                                                                                                                                                                                                                                                                                                                                                                                                                                                                                                                                                                                                                                                                                                                                                                                                                                                                                                                                                                                                                                                                                                                                                 | 2                                                                                                                                                                                                                                                                                                                              |     |    |                    |   |   |                          |   |   |                         |   |   |                                             |   |   |                             |   |   |                    |   |   |                           |   |   |                        |   |   |                                      |   |   |                    |   |   |                             |   |   |                                   |   |    |                   |   |   |                         |   |   |  |
| CHAMA                                                                                                                                       | 1                                                                                                                                                                                                                                                                                                                                                                                                                                                                                                                                                                                                                                                                                                                                                                                                                                                                                                                                                                                                                                                                                                                                                                                                                                                                                                                                                                                                                                                                                                                                                                                                                                                                                                                                                                                                                                                                                                                                                                                 | 2                                                                                                                                                                                                                                                                                                                              |     |    |                    |   |   |                          |   |   |                         |   |   |                                             |   |   |                             |   |   |                    |   |   |                           |   |   |                        |   |   |                                      |   |   |                    |   |   |                             |   |   |                                   |   |    |                   |   |   |                         |   |   |  |
| MWENYE DUKA                                                                                                                                 | 1                                                                                                                                                                                                                                                                                                                                                                                                                                                                                                                                                                                                                                                                                                                                                                                                                                                                                                                                                                                                                                                                                                                                                                                                                                                                                                                                                                                                                                                                                                                                                                                                                                                                                                                                                                                                                                                                                                                                                                                 | 2                                                                                                                                                                                                                                                                                                                              |     |    |                    |   |   |                          |   |   |                         |   |   |                                             |   |   |                             |   |   |                    |   |   |                           |   |   |                        |   |   |                                      |   |   |                    |   |   |                             |   |   |                                   |   |    |                   |   |   |                         |   |   |  |
| UEKEZAJI WA KILIMO                                                                                                                          | 1                                                                                                                                                                                                                                                                                                                                                                                                                                                                                                                                                                                                                                                                                                                                                                                                                                                                                                                                                                                                                                                                                                                                                                                                                                                                                                                                                                                                                                                                                                                                                                                                                                                                                                                                                                                                                                                                                                                                                                                 | 2                                                                                                                                                                                                                                                                                                                              |     |    |                    |   |   |                          |   |   |                         |   |   |                                             |   |   |                             |   |   |                    |   |   |                           |   |   |                        |   |   |                                      |   |   |                    |   |   |                             |   |   |                                   |   |    |                   |   |   |                         |   |   |  |
| MPESA                                                                                                                                       | 1                                                                                                                                                                                                                                                                                                                                                                                                                                                                                                                                                                                                                                                                                                                                                                                                                                                                                                                                                                                                                                                                                                                                                                                                                                                                                                                                                                                                                                                                                                                                                                                                                                                                                                                                                                                                                                                                                                                                                                                 | 2                                                                                                                                                                                                                                                                                                                              |     |    |                    |   |   |                          |   |   |                         |   |   |                                             |   |   |                             |   |   |                    |   |   |                           |   |   |                        |   |   |                                      |   |   |                    |   |   |                             |   |   |                                   |   |    |                   |   |   |                         |   |   |  |
| INGINE (ELEZA)                                                                                                                              |                                                                                                                                                                                                                                                                                                                                                                                                                                                                                                                                                                                                                                                                                                                                                                                                                                                                                                                                                                                                                                                                                                                                                                                                                                                                                                                                                                                                                                                                                                                                                                                                                                                                                                                                                                                                                                                                                                                                                                                   | 96                                                                                                                                                                                                                                                                                                                             |     |    |                    |   |   |                          |   |   |                         |   |   |                                             |   |   |                             |   |   |                    |   |   |                           |   |   |                        |   |   |                                      |   |   |                    |   |   |                             |   |   |                                   |   |    |                   |   |   |                         |   |   |  |
| Je, wewe unakubaliana au ukubaliani na taarifa ifuatayo: "Ni watu wenye pesa nyingi tu wanaoweza kuweka akiba ya pesa."?                    | AGREE 1<br>DISAGREE 2                                                                                                                                                                                                                                                                                                                                                                                                                                                                                                                                                                                                                                                                                                                                                                                                                                                                                                                                                                                                                                                                                                                                                                                                                                                                                                                                                                                                                                                                                                                                                                                                                                                                                                                                                                                                                                                                                                                                                             |                                                                                                                                                                                                                                                                                                                                |     |    |                    |   |   |                          |   |   |                         |   |   |                                             |   |   |                             |   |   |                    |   |   |                           |   |   |                        |   |   |                                      |   |   |                    |   |   |                             |   |   |                                   |   |    |                   |   |   |                         |   |   |  |
| <b>SECTION 5: SOCIAL CAPITAL AND NETWORKS</b>                                                                                               |                                                                                                                                                                                                                                                                                                                                                                                                                                                                                                                                                                                                                                                                                                                                                                                                                                                                                                                                                                                                                                                                                                                                                                                                                                                                                                                                                                                                                                                                                                                                                                                                                                                                                                                                                                                                                                                                                                                                                                                   |                                                                                                                                                                                                                                                                                                                                |     |    |                    |   |   |                          |   |   |                         |   |   |                                             |   |   |                             |   |   |                    |   |   |                           |   |   |                        |   |   |                                      |   |   |                    |   |   |                             |   |   |                                   |   |    |                   |   |   |                         |   |   |  |
| <b>QUESTIONS</b>                                                                                                                            |                                                                                                                                                                                                                                                                                                                                                                                                                                                                                                                                                                                                                                                                                                                                                                                                                                                                                                                                                                                                                                                                                                                                                                                                                                                                                                                                                                                                                                                                                                                                                                                                                                                                                                                                                                                                                                                                                                                                                                                   | <b>RESPONSES</b>                                                                                                                                                                                                                                                                                                               |     |    |                    |   |   |                          |   |   |                         |   |   |                                             |   |   |                             |   |   |                    |   |   |                           |   |   |                        |   |   |                                      |   |   |                    |   |   |                             |   |   |                                   |   |    |                   |   |   |                         |   |   |  |
| Je wewe ni mwanachama wa chama (Kilabu) chochote cha kijamii ulipohuthuria katika mwaka moja uliopita? Kwa mfano wewe ni mwanachama wa ...? | <b>502</b><br>Ni lini mara ya mwisho ulipohudhuria chama hicho? ?                                                                                                                                                                                                                                                                                                                                                                                                                                                                                                                                                                                                                                                                                                                                                                                                                                                                                                                                                                                                                                                                                                                                                                                                                                                                                                                                                                                                                                                                                                                                                                                                                                                                                                                                                                                                                                                                                                                 | <b>503</b><br>Je, kilikuwa chama cha wasichana peke yake au cha mchanganyiko wa wasichana                                                                                                                                                                                                                                      |     |    |                    |   |   |                          |   |   |                         |   |   |                                             |   |   |                             |   |   |                    |   |   |                           |   |   |                        |   |   |                                      |   |   |                    |   |   |                             |   |   |                                   |   |    |                   |   |   |                         |   |   |  |

| [READ LIST; IF 'YES' ASK 502 and 503]                                                                                                                                                                                                                                                                                  | 1 = Within last 7 days<br>2 = Within the last month<br>3 = Within the last one year |            |                         | na wavulana? |       |
|------------------------------------------------------------------------------------------------------------------------------------------------------------------------------------------------------------------------------------------------------------------------------------------------------------------------|-------------------------------------------------------------------------------------|------------|-------------------------|--------------|-------|
| YES NO                                                                                                                                                                                                                                                                                                                 | LAST 7 DAYS                                                                         | LAST MONTH | IN THE LAST ONE YEAR    | Girls Only   | Mixed |
| a. Chama cha jinsia                                                                                                                                                                                                                                                                                                    | 1                                                                                   | 2          | a. 1 2 3                | a. 1         | 2     |
| b. Haki za watoto/Haki za kibinadamu                                                                                                                                                                                                                                                                                   | 1                                                                                   | 2          | b. 1 2 3                | b. 1         | 2     |
| c. Chama cha mwongozo na kutoa mashauri ya UKIMWI/stadi ya afya ya maisha                                                                                                                                                                                                                                              | 1                                                                                   | 2          | c. 1 2 3                | c. 1         | 2     |
| d. Wasichana viongozi/skauti                                                                                                                                                                                                                                                                                           | 1                                                                                   | 2          | d. 1 2 3                | d. 1         | 2     |
| e. Chama cha michezo                                                                                                                                                                                                                                                                                                   | 1                                                                                   | 2          | e. 1 2 3                | e. 1         | 2     |
| f. Kikundi cha kuigiza au kucheza densi                                                                                                                                                                                                                                                                                | 1                                                                                   | 2          | f. 1 2 3                | f. 1         | 2     |
| g. Kikundi cha kanisa/kikundi cha Kiislari                                                                                                                                                                                                                                                                             | 1                                                                                   | 2          | g. 1 2 3                | g. 1         | 2     |
| h. Kingine chochote _____                                                                                                                                                                                                                                                                                              | 1                                                                                   | 2          | h. 1 2 3                | h. 1         | 2     |
| <p><b>[FIRST ASK ALL QUESTIONS FOR MALES AND RECORD ANSWERS IN COLUMN A; THEN RETURN TO ASK ALL QUESTIONS FOR FEMALES AND RECORD ANSWERS IN COLUMN B]</b></p> <p>Sasa nataka nikuulize kushusu rafiki zako wa karibu. Namaanisha, rafiki mwema ni yule unayeweza kumfichulia maneno yako binafsi na maneno muhimu.</p> |                                                                                     |            |                         |              |       |
| [FRIENDS: 0-80; RECORD 80 IF MORE THAN 80; RECORD 88 IF DON'T KNOW]                                                                                                                                                                                                                                                    | A. MALES                                                                            |            | B. FEMALES              |              |       |
| Una rafiki wangapi wa karibu walio (WAUME/WAKIKE)?                                                                                                                                                                                                                                                                     | [IF = 0 → "FEMALES"]                                                                |            | [IF = A= 0 & B=0 → 507] |              |       |
| Ni wangapi kati ya hao rafiki (WAUME/WAKIKE) wanaoenda shuleni kwa sasa?                                                                                                                                                                                                                                               | [IF = 0 → 'FEMALES']                                                                |            | [IF = A=0 & B=0 → 507]  |              |       |
| Ni wangapi kati ya hao rafiki (WAUME/WAKIKE) wanaoenda shuleni mwako?                                                                                                                                                                                                                                                  |                                                                                     |            |                         |              |       |
| <b>SOCIAL ASSETS AND SAFETY NETS</b>                                                                                                                                                                                                                                                                                   |                                                                                     |            |                         |              |       |
| Nitakusomea taarifa nyinginezo zaidi kisha nikuulize kama unakubaliana au haukubaliani                                                                                                                                                                                                                                 |                                                                                     |            |                         |              |       |
| Nina rafiki wengi katika mtaa wangu/jamii yangu?                                                                                                                                                                                                                                                                       | AGREE<br>DISAGREE                                                                   |            | 1<br>2                  |              |       |
| Nina hisi nikiwa salama nikitembea katika mtaa wangu/ jamii yangu mchana.                                                                                                                                                                                                                                              | AGREE<br>DISAGREE                                                                   |            | 1<br>2                  |              |       |
| Nina hisi nikiwa salama nikitembea katika mtaa wangu/ jamii yangu giza inapoingia                                                                                                                                                                                                                                      | AGREE<br>DISAGREE                                                                   |            | 1<br>2                  |              |       |
| Watu katika mtaa wangu/jamii yangu huaminiana.                                                                                                                                                                                                                                                                         | AGREE<br>DISAGREE                                                                   |            | 1<br>2                  |              |       |
| Nyakati nyingine, katika maisha yangu ya kila siku, mimi huogopa nitabakwa.                                                                                                                                                                                                                                            | AGREE<br>DISAGREE                                                                   |            | 1<br>2                  |              |       |
| Nimeguswa isivyofaa na mvulana au mwanamume katika miezi sita iliyopita                                                                                                                                                                                                                                                | AGREE<br>DISAGREE                                                                   |            | 1<br>2                  |              |       |
| Nimeibiwa katika miezi sita iliyopita katika mtaa wangu/ jamii yangu                                                                                                                                                                                                                                                   | AGREE<br>DISAGREE                                                                   |            | 1<br>2                  |              |       |
| Nimeibiwa katika miezi sita iliyopita nje ya mtaa wangu/ jamii yangu                                                                                                                                                                                                                                                   | AGREE<br>DISAGREE                                                                   |            | 1<br>2                  |              |       |

|              |                                                                                                                                                                                                        |                                                                        |                                  |                                                                                                                                                                                                     |
|--------------|--------------------------------------------------------------------------------------------------------------------------------------------------------------------------------------------------------|------------------------------------------------------------------------|----------------------------------|-----------------------------------------------------------------------------------------------------------------------------------------------------------------------------------------------------|
|              | Katika mtaa wangu/jamii yangu, vijana au wanaume hunichezea-chezea niendeleapo na shughuli zangu za kila siku                                                                                          | AGREE<br>DISAGREE                                                      | 1<br>2                           |                                                                                                                                                                                                     |
|              | Ninaye rafiki mzuri katika jamii yangu ambaye naweza kumwendea ili nipate usaidizi nikiwa na tatizo zito.                                                                                              | AGREE<br>DISAGREE                                                      | 1<br>2                           |                                                                                                                                                                                                     |
|              | Kuna mwanamke fulani katika jamii yangu, asiye mzazi wala mwalimu wangu, ambaye naweza kumwendea kwa msaada nikiwa na tatizo zito.                                                                     | AGREE<br>DISAGREE                                                      |                                  |                                                                                                                                                                                                     |
|              | Ninaye rafiki mzuri ninayekutana naye mara kwa mara , ambaye naweza kuzungumza naye kuhusu shida zangu na furaha zangu, na kumwuliza maswali.                                                          | AGREE<br>DISAGREE                                                      |                                  |                                                                                                                                                                                                     |
|              | Kuna mwanamke fulani katika maisha yangu, ninayekutana naye kwa kawaida, ambaye si mamangu wala mwalimu wangu, ambaye naweza kuzungumza naye kuhusu shida zangu na furaha zangu, na kumwuliza maswali. | AGREE<br>DISAGREE                                                      | 1<br>2                           |                                                                                                                                                                                                     |
| <b>Q520A</b> | Je, ungeweza kutegemea watu wafuatao ikiwa ungekuwa na uhitaji wa haraka wa pesa?<br><br>[READ THE LIST. IF NO ON Q518A, GO TO NEXT ITEM, SKIP Q518B, Q518C]                                           | <b>Q520B</b>                                                           | Sex                              | <b>Q520C</b><br>Wanaishi wapi? (CODE)<br><br>CODES<br>1 Resides in my household<br>2 Resides in this community<br>3 Resides in neighboring community<br>4 Resides elsewhere/ upcountry (rural area) |
|              |                                                                                                                                                                                                        |                                                                        | Male Only    Female Only    Both | Male CODES    Female CODES                                                                                                                                                                          |
| <b>A</b>     | Mzazi/Mlezi                    YES    NO<br>1      2                                                                                                                                                   |                                                                        | 1      2      3                  | <input type="text"/> <input type="text"/>                                                                                                                                                           |
| <b>B</b>     | Ndugu/Dada                    1      2                                                                                                                                                                 |                                                                        | 1      2      3                  | <input type="text"/> <input type="text"/>                                                                                                                                                           |
| <b>C</b>     | Mtu wa Ukoo                    1      2                                                                                                                                                                |                                                                        | 1      2      3                  | <input type="text"/> <input type="text"/>                                                                                                                                                           |
| <b>D</b>     | Rafiki wa karibu                1      2                                                                                                                                                               |                                                                        | 1      2      3                  | <input type="text"/> <input type="text"/>                                                                                                                                                           |
| <b>E</b>     | Jirani                              1      2                                                                                                                                                           |                                                                        | 1      2      3                  | <input type="text"/> <input type="text"/>                                                                                                                                                           |
| <b>F</b>     | Rafiki mvulana/bwana        1      2                                                                                                                                                                   |                                                                        | 1      2      3                  | <input type="text"/> <input type="text"/>                                                                                                                                                           |
| <b>G</b>     | Mshauri                          1      2                                                                                                                                                              |                                                                        | 1      2      3                  | <input type="text"/> <input type="text"/>                                                                                                                                                           |
| <b>H</b>     | Mwalimu                          1      2                                                                                                                                                              |                                                                        | 1      2      3                  | <input type="text"/> <input type="text"/>                                                                                                                                                           |
| <b>Q521A</b> | Je, unaweza mwendea yeyote kati ya watu hawa ukiwa na swali kuhusu afya yako au mwili wako?<br><br>[READ THE LIST. IF NO ON Q519A, GO TO NEXT ITEM, SKIP Q519B, Q519C]                                 | <b>Q521B</b>                                                           | Sex                              | <b>Q521C</b><br>Residence/location (CODE)<br><br>1 Resides in my household<br>2 Resides in this community<br>3 Resides in neighboring community<br>4 Resides elsewhere/ upcountry (rural area)      |
|              |                                                                                                                                                                                                        |                                                                        | Male Only    Female Only    Both | Male CODES    Female CODES                                                                                                                                                                          |
| <b>A</b>     | Mzazi/ Mlezi                    YES    NO<br>1      2                                                                                                                                                  |                                                                        | 1      2      3                  | <input type="text"/> <input type="text"/>                                                                                                                                                           |
| <b>B</b>     | Ndugu/Dada                    1      2                                                                                                                                                                 |                                                                        | 1      2      3                  | <input type="text"/> <input type="text"/>                                                                                                                                                           |
| <b>C</b>     | Mtu wa ukoo                    1      2                                                                                                                                                                |                                                                        | 1      2      3                  | <input type="text"/> <input type="text"/>                                                                                                                                                           |
| <b>D</b>     | Rafiki wa karibu                1      2                                                                                                                                                               |                                                                        | 1      2      3                  | <input type="text"/> <input type="text"/>                                                                                                                                                           |
| <b>E</b>     | Jirani                              1      2                                                                                                                                                           |                                                                        | 1      2      3                  | <input type="text"/> <input type="text"/>                                                                                                                                                           |
| <b>F</b>     | Rafiki mvulana/bwana        1      2                                                                                                                                                                   |                                                                        | 1      2      3                  | <input type="text"/> <input type="text"/>                                                                                                                                                           |
| <b>G</b>     | Mshauri                          1      2                                                                                                                                                              |                                                                        | 1      2      3                  | <input type="text"/> <input type="text"/>                                                                                                                                                           |
| <b>H</b>     | Mwalimu                          1      2                                                                                                                                                              |                                                                        | 1      2      3                  | <input type="text"/> <input type="text"/>                                                                                                                                                           |
|              | Kwa kila moja ya mahali panapofuata, tafadhali niambie kama hauruhusiwi kwa kawaida kwenda hapo ukiwa peke yako, wakati tu ambapo umeandamana na mtu mwingine, ama hurusiwe kwenda hapo hata kidogo.   |                                                                        |                                  |                                                                                                                                                                                                     |
|              | Kliniki ya matibabu ya kwenu                                                                                                                                                                           | ON MY OWN<br>IF SOMEONE ACCOMPANIES ME<br>NOT AT ALL<br>NEVER GO THERE | 1<br>2<br>3<br>9                 |                                                                                                                                                                                                     |
|              | Nyumba za rafiki katika mtaa wako                                                                                                                                                                      | ON MY OWN<br>IF SOMEONE ACCOMPANIES ME                                 | 1<br>2                           |                                                                                                                                                                                                     |

|                                                                                                                                                                                                                                                                                                                                                                                                                        |                                                                                                                                                                                                                                                                                                                                                                                                                                                           |                                                                               |     |
|------------------------------------------------------------------------------------------------------------------------------------------------------------------------------------------------------------------------------------------------------------------------------------------------------------------------------------------------------------------------------------------------------------------------|-----------------------------------------------------------------------------------------------------------------------------------------------------------------------------------------------------------------------------------------------------------------------------------------------------------------------------------------------------------------------------------------------------------------------------------------------------------|-------------------------------------------------------------------------------|-----|
|                                                                                                                                                                                                                                                                                                                                                                                                                        | NOT AT ALL<br>NEVER GO THERE                                                                                                                                                                                                                                                                                                                                                                                                                              | 3<br>9                                                                        |     |
| Kikundi cha vijana/Kikundi cha wasichana                                                                                                                                                                                                                                                                                                                                                                               | ON MY OWN<br>IF SOMEONE ACCOMPANIES ME<br>NOT AT ALL<br>NEVER GO THERE                                                                                                                                                                                                                                                                                                                                                                                    | 1<br>2<br>3<br>9                                                              |     |
| Mambo mengi tofauti tofauti yanaweza kuzuia wasichana wasipate ushauri wa afya au matibabu. Unapokuwa mgonjwa na wataka kupata ushauri wa kitiba au matibabu, je, yafuatayo ni tatizo kubwa au la?<br><br><b>[READ THE LIST]</b>                                                                                                                                                                                       |                                                                                                                                                                                                                                                                                                                                                                                                                                                           | <b>BIG PROBLEM</b><br>YES NO                                                  |     |
| a. Kupata ruhusa kwenda?                                                                                                                                                                                                                                                                                                                                                                                               | a. PERMISSION                                                                                                                                                                                                                                                                                                                                                                                                                                             | 1 2                                                                           |     |
| b. Kupata pesa zinazohitajika kwa ajili ya matibabu?                                                                                                                                                                                                                                                                                                                                                                   | b. MONEY                                                                                                                                                                                                                                                                                                                                                                                                                                                  | 1 2                                                                           |     |
| c. Umbali wa kituo cha afya?                                                                                                                                                                                                                                                                                                                                                                                           | c. DISTANCE                                                                                                                                                                                                                                                                                                                                                                                                                                               | 1 2                                                                           |     |
| d. Kuhitaji kuchukua usafiri/uchukuzi?                                                                                                                                                                                                                                                                                                                                                                                 | d. TRANSPORT                                                                                                                                                                                                                                                                                                                                                                                                                                              | 1 2                                                                           |     |
| e. Kutotaka kwenda peke yako?                                                                                                                                                                                                                                                                                                                                                                                          | e. GO ALONE                                                                                                                                                                                                                                                                                                                                                                                                                                               | 1 2                                                                           |     |
| f. Kuwa na wasiwasi kwamba huenda kusiwe na muhudumu wa afya wa kike?                                                                                                                                                                                                                                                                                                                                                  | f. NO FEMALE PROVIDER                                                                                                                                                                                                                                                                                                                                                                                                                                     | 1 2                                                                           |     |
| g. Kuwa na wasiwasi kwamba huenda kusiwe na muhudumu wa afya yeyote?                                                                                                                                                                                                                                                                                                                                                   | g. NO PROVIDER                                                                                                                                                                                                                                                                                                                                                                                                                                            | 1 2                                                                           |     |
| h. kuwa na wasiwasi kwamba huenda kusiwe na madawa?                                                                                                                                                                                                                                                                                                                                                                    | h. NO DRUGS                                                                                                                                                                                                                                                                                                                                                                                                                                               | 1 2                                                                           |     |
| i. Kuwa na wasiwasi kwamba huenda kusiwe na faragha/usiri                                                                                                                                                                                                                                                                                                                                                              | i. LACK OF PRIVACY/CONFIDENTIALITY                                                                                                                                                                                                                                                                                                                                                                                                                        | 1 2                                                                           |     |
| j. Kuogopa kufikiriwa vibaya na muhudumu wa afya                                                                                                                                                                                                                                                                                                                                                                       | J. JUDGEMENT BY PROVIDER                                                                                                                                                                                                                                                                                                                                                                                                                                  | 1 2                                                                           |     |
| k. Kuona aibu kuzungumzia swala hilo la afya                                                                                                                                                                                                                                                                                                                                                                           | k. EMBARRASSMENT                                                                                                                                                                                                                                                                                                                                                                                                                                          | 1 2                                                                           |     |
| Katika miezi sita iliyopita, je ulienda kwenye kituo cha afya kupata aina yoyote ya huduma za afya?                                                                                                                                                                                                                                                                                                                    | YES<br>NO                                                                                                                                                                                                                                                                                                                                                                                                                                                 | 1<br>2                                                                        | 529 |
| Ulizuru gani kati ya vituo vya afya vifuatavyo katika miezi sita iliyopita?                                                                                                                                                                                                                                                                                                                                            | KILINIKI YA KIBNAFSI<br>HOSPITALI YA UMMA (SEREKALI)<br>KITUO CHA AFYA AU KILINIKI YA UMMA (SEREKALI)<br>ZAHANATI<br>DUKA LA DAWA<br>HUDUMA TAMBA (ZA KUZUNGUKA)<br>VITUO VIZIVYO VYA SEREKALI<br>INGINE (TAJA) .....                                                                                                                                                                                                                                     | 1<br>2<br>3<br>4<br>5<br>6<br>7<br>98                                         |     |
| Tafadhali niambie ni huduma zipi za afya ulizopokea ulipotembelea kituo cha afya?<br><br><b>[RECORD ALL MENTIONED]</b>                                                                                                                                                                                                                                                                                                 | <b>SERVICE CODES</b><br>a. GENERAL HEALTH/ SICKNESS<br>b. FAMILY PLANNING<br>c. PREGNANCY TEST<br>d. ANTENATAL CARE<br>e. HIV TESTING<br>f. HIV CARE/TREATMENT<br>g. STI TESTING (NON-HIV)<br>h. STI CARE/TREATMENT ( NON-HIV)<br>i. CHILD HEALTH/SICKNESS<br>j. DELIVERY<br>k. POSTNATAL CARE<br>l. URINARY TRACT INFECTIONS (UTIs) CARE/TREATMENT<br>m. OTHER REPRODUCTIVE HEALTH SERVICES<br>n. PHARMACY/VITAMINS/MEDICINE<br>o. OTHER (SPECIFY) _____ | 1<br>2<br>3<br>4<br>5<br>6<br>7<br>8<br>9<br>10<br>11<br>12<br>13<br>14<br>98 |     |
| Ningependa ufikirie siku yako ya wiki ya karibuni zaidi, kutoka Jumatatu hadi Ijumaa, ambayo haikuwa sikukuu ya umma au ya shule na ujaribu kukumbuka shughuli tofauti ulizofanya siku hiyo. Niambie kuhusu hizo shughuli tofauti ulizofanya na muda uliochukua kuzifanya.<br><br><b>[RECORD HOW MANY HOURS SHE SPENT ON VARIOUS ACTIVITIES DURING THE LAST COMPLETE WEEKDAY – NOT SATURDAY OR SUNDAY OR HOLIDAY.]</b> | <b>ACTIVITY</b>                                                                                                                                                                                                                                                                                                                                                                                                                                           | <b>NUMBER OF MINUTES</b>                                                      |     |
|                                                                                                                                                                                                                                                                                                                                                                                                                        | a. Shuleni                                                                                                                                                                                                                                                                                                                                                                                                                                                | <input type="text"/>                                                          |     |
|                                                                                                                                                                                                                                                                                                                                                                                                                        | b. Kazi ya bila malipo nyumbani (k.m.. Kupika, kusafisha, kufua nguo)                                                                                                                                                                                                                                                                                                                                                                                     | <input type="text"/>                                                          |     |
|                                                                                                                                                                                                                                                                                                                                                                                                                        | c. Kazi ya bila malipo nje ya nyumbani (k.m. kwenda sokoni, kuchota maji)                                                                                                                                                                                                                                                                                                                                                                                 | <input type="text"/>                                                          |     |
|                                                                                                                                                                                                                                                                                                                                                                                                                        | d. Kazi ya malipo kazini/kazi ya malipo kwa ajili ya wengine/ katika biashara ya kibinafsi                                                                                                                                                                                                                                                                                                                                                                | <input type="text"/>                                                          |     |

|                                                                                                                                                                                     |                                                                                                       |                             |                                    |
|-------------------------------------------------------------------------------------------------------------------------------------------------------------------------------------|-------------------------------------------------------------------------------------------------------|-----------------------------|------------------------------------|
|                                                                                                                                                                                     | e. Wakati wa mapumziko (kuongea na rafiki, kunywa chai/kahawa na rafiki, kusoma, kutazam televisheni) | <input type="text"/>        |                                    |
|                                                                                                                                                                                     | f. Kanisa/Mskiti/Kuomba/duksi/madrassa                                                                | <input type="text"/>        |                                    |
|                                                                                                                                                                                     | g. Kusoma/kufanya kazi ya ziada ya shule                                                              | <input type="text"/>        |                                    |
|                                                                                                                                                                                     | h. Kusafiri kwenda na kutoka shuleni                                                                  | <input type="text"/>        |                                    |
|                                                                                                                                                                                     | i. Kulala                                                                                             | <input type="text"/>        |                                    |
|                                                                                                                                                                                     | k. TOTAL MINUTES [CHECK NOT MORE THAN 1440]                                                           | <input type="text"/>        |                                    |
| <b>SECTION 6: SELF-EFFICACY, LOCUS OF CONTROL, AND GENDER ATTITUDES</b>                                                                                                             |                                                                                                       |                             |                                    |
| <b>QUESTIONS</b>                                                                                                                                                                    |                                                                                                       | <b>RESPONSES</b>            |                                    |
| <b>Generalized Self Efficacy</b>                                                                                                                                                    |                                                                                                       |                             |                                    |
| Sasa nitakusomea baadhi ya taarifa, tafadhali niambie kama unakubaliana nazo au haukubaliani.                                                                                       |                                                                                                       |                             |                                    |
|                                                                                                                                                                                     |                                                                                                       | <b>AGREE</b>                | <b>DISAGREE</b>                    |
|                                                                                                                                                                                     |                                                                                                       | <b>DON'T KNOW</b>           |                                    |
| a. Kila mara unaweza kusuluhisha matatizo magumu ukijaribu sana.                                                                                                                    |                                                                                                       | 1                           | 2                                  |
| b. Mtu akikupinga, bado unaweza kupata njia za kufanya utakavyo.                                                                                                                    |                                                                                                       | 1                           | 2                                  |
| c. Ni rahisi kwako kukazia fikira malengo yangu na kutimiza miradi yangu.                                                                                                           |                                                                                                       | 1                           | 2                                  |
| d. Una uhakika kwamba ungeweza kushughulikia matukio yasiyotarajiwa vizuri sana.                                                                                                    |                                                                                                       | 1                           | 2                                  |
| e. Kwa sababu ya msaada ambao unaweza kupata, unajua kwamba unaweza kukabiliana na hali zisizotarajiwa.                                                                             |                                                                                                       | 1                           | 2                                  |
| f. Unaweza kutatua matatizo yaliyo mengi ukijitahidi inavyohitajiwa.                                                                                                                |                                                                                                       | 1                           | 2                                  |
| g. Unaweza kubaki ukiwa mtulivu ukabiliwapo na magumu kwa sababu unaweza kutegemea uwezo wako mwenyewe.                                                                             |                                                                                                       | 1                           | 2                                  |
| h. Unapokabili tatizo, kwa kawaida unaweza kupata suluhisho zaidi ya moja.                                                                                                          |                                                                                                       | 1                           | 2                                  |
| i. Ukiwa na tatizo, kwa kawaida unaweza kufikiria suluhisho.                                                                                                                        |                                                                                                       | 1                           | 2                                  |
| j. Kwa kawaida unaweza kushughulikia hali yoyote inayokupata.                                                                                                                       |                                                                                                       | 1                           | 2                                  |
| <b>Self-Efficacy (India Transition Study)</b>                                                                                                                                       |                                                                                                       |                             |                                    |
| Je, wewe hutoa maoni yako kwa wakubwa wako katika familia yako? Unaweza kusema ni mara kwa mara, wakati mwingine au hujawahi?                                                       | OFTEN<br>SOMETIMES<br>NEVER                                                                           |                             | 1<br>2<br>3                        |
| Usipokubaliana na mtu, je kwa kawaida wewe hupitwambia mtu mtu kwamba hukubaliani naye? Unaweza kusema kwamba wewe humkabili, wakati mwingine unajibu ama wewe hunyamaza kila mara? | ALWAYS CONFRONT<br>SOMETIMES GIVE RESPONSE<br>ALWAYS,STAY QUIET                                       |                             | 1<br>2<br>3                        |
| Ikiwa mvulama au mwanaume angejaribu kukushika kwenye sehemu zako za siri bila ya wewe kutaka. Je, ungeweza                                                                         | YES<br>NO                                                                                             |                             | 1<br>2                             |
| Je, unajiamini kuweza kuzungumza mbele ya kikundi cha watu wa rika lako? Unaweza kusema ni kila mara, wakati mwingine au hujiamini kamwe?                                           | ALWAYS<br>SOMETIMES<br>NEVER                                                                          |                             | 1<br>2<br>3                        |
| <b>Kwa taarifa zifuatazo tafadhali nieleze kama unakubaliana sana, unakubaliana kidogo, hukubaliani kidogo, hukubaliani sana,</b>                                                   |                                                                                                       |                             |                                    |
| <b>Locus of Control</b>                                                                                                                                                             | <b>UNAKUBALI ANA SANA</b>                                                                             | <b>UNAKUBALIA NA KIDOGO</b> | <b>HAUKUBALIA NI KIDOGO I SANA</b> |
| a. Kwa kiwango kikubwa mambo muhimu yanayotendeka maishani mwangu yanatendeka kibahati.                                                                                             | 1                                                                                                     | 2                           | 3                                  |
| b. Kufikia sasa, mafanikio maishani mwangu yamekuwa kwasababu ya uwezo wangu na bidii.                                                                                              | 1                                                                                                     | 2                           | 3                                  |
| c. Kufaulu au kutofaulu kwangu katika mthani wa KCPE kutategemea vitendo vyangu na kile nifanyacho                                                                                  | 1                                                                                                     | 2                           | 3                                  |
| d. Ninapofaulu huwa mara mingi ni kwasababu ya bahati na nisipofaulu huwa mara mingi ni kwasababu ya nguvu ambazo watu wengine wanazo                                               | 1                                                                                                     | 2                           | 3                                  |
| e. Ikiwa nitafaulu kuafikia malengo yangu maishani, itakuwa ni kwasababu ya vile nilivyojitayarisha vyema.                                                                          | 1                                                                                                     | 2                           | 3                                  |
| f. Shida zangu nyingi zitatoweka nikizipuuza                                                                                                                                        | 1                                                                                                     | 2                           | 3                                  |

| <b>GENDER NORMS (GEAS)</b>                                                                                                                          |                    |                      |                      |                    |       |
|-----------------------------------------------------------------------------------------------------------------------------------------------------|--------------------|----------------------|----------------------|--------------------|-------|
| Kwa taarifa zifuatazo tafadhali nieleze kama unakubaliana sana, unakubaliana kidogo, hukubaliani kidogo, hukubaliani sana,                          |                    |                      |                      |                    |       |
| Girls Freedom Versus Lack of Independence                                                                                                           | UNAKUBALI ANA SANA | UNAKUBALIA NA KIDOGO | HAUKUBALIA NI KIDOGO | HAUKUBALIA NI SANA | SIJUI |
| a. Wasichana wanafaa kujitegemea kama wavulana                                                                                                      | 1                  | 2                    | 3                    | 4                  | 88    |
| b. Wasichana hawafai kutoka na marafiki zao isipokuwa tu kama kuna mtu mzima.                                                                       | 1                  | 2                    | 3                    | 4                  | 88    |
| c. Wasichana huwa wanahisi kwamba uhuru wao ni mdogo ukilinganisha na wa wavulana kuhusiana na kile wanachoweza kufanya na pahali wanapoweza kwenda | 1                  | 2                    | 3                    | 4                  | 88    |
| d. Wasichana wanafaa kuwa na nafasi sawa na wavulana                                                                                                | 1                  | 2                    | 3                    | 4                  | 88    |
| e. Wasichana wanafaa kuwa na uhuru wa kutembea kama wavulana                                                                                        | 1                  | 2                    | 3                    | 4                  | 88    |
| <b>Girls Responsibilities</b>                                                                                                                       |                    |                      |                      |                    |       |
| f. Ni muhimu kwa wasichana kufanya vyema shuleni jinsi ilivyo muhimu kwa wavulana                                                                   | 1                  | 2                    | 3                    | 4                  | 88    |
| g. Wavulana na wasichana wanafaa kujukumika kwa usawa katika kazi za nyumbani                                                                       | 1                  | 2                    | 3                    | 4                  | 88    |
| <b>Deference/Proper/Composed</b>                                                                                                                    |                    |                      |                      |                    |       |
| h. Wasichana wanafaa kujiwekea fikira zao na wasiseme wanachofikiria kwa umma                                                                       | 1                  | 2                    | 3                    | 4                  | 88    |
| i. Wasichana wanatarajiwa kuwa wanyenyekevu                                                                                                         | 1                  | 2                    | 3                    | 4                  | 88    |
| j. Wasichana hawafai kutoa madai mengi sana kwa wengine                                                                                             | 1                  | 2                    | 3                    | 4                  | 88    |
| k. Msichana anafaa kusema anachofikiria hata kama kitaumiza hisia za mtu                                                                            | 1                  | 2                    | 3                    | 4                  | 88    |
| l. Wasichana wanaobishana na rafiki zao hadharani hawana tabia za kike.                                                                             | 1                  | 2                    | 3                    | 4                  | 88    |
| <b>Girls are Responsible for Arousing Boys</b>                                                                                                      |                    |                      |                      |                    |       |
| m. Wasichana wanafaa kujifunika, la sivyo watakutia kimapenzi isivyohitajika                                                                        | 1                  | 2                    | 3                    | 4                  | 88    |
| n. Wasichana wanafaa kuwa waangalifu kuhusu jinsi wanavyo onekana ili wasionekane ni kama wanajaribu kuwatongoza                                    | 1                  | 2                    | 3                    | 4                  | 88    |
| o. Ni makosa yake msichana wavulana wakimtongoza                                                                                                    | 1                  | 2                    | 3                    | 4                  | 88    |
| p. Wasichana huvaa nguo fupi ili kuwavutia wavulana                                                                                                 | 1                  | 2                    | 3                    | 4                  | 88    |
| q. Wasichana wanafaa kuwa huru kuvaa wanayotaka                                                                                                     | 1                  | 2                    | 3                    | 4                  | 88    |

| <b>SECTION 7. MARRIAGE &amp; SEXUAL BEHAVIOR</b>                      |                                                                                  |                                                                                      |
|-----------------------------------------------------------------------|----------------------------------------------------------------------------------|--------------------------------------------------------------------------------------|
| QUESTIONS                                                             | RESPONSES                                                                        |                                                                                      |
| Je, umewahi kuolewa?                                                  | NDIO<br>LA                                                                       | 1<br>2<br><b>703</b>                                                                 |
| Je, unatarajia kuolewa ukiwa na miaka mingapi?                        | UMRI<br>[10-50]<br>SIJUI<br>SITARAJII KUOLEWA                                    | <input type="text"/><br><input type="text"/><br>88<br>98<br><b>ALL</b><br><b>705</b> |
| Je, uliolewa ukiwa na miaka mingapi?                                  | UMRI<br>[10-20]<br>SIJUI                                                         | <input type="text"/><br><input type="text"/><br>88                                   |
| Je, kwa sasa umeolewa, umetengana, umetalikiana au umefiwa na mwenzi? | NIMEOLEWA/NAISHI NA MWENZI<br>NIMETENGANA<br>NIMETALAKIANA<br>NIMEFIWA NA MWENZI | 1<br>2<br>3<br>4                                                                     |
| Je, umewahi kuishi pamoja na mpenzi wa kiume?                         | NDIO<br>LA                                                                       | 1<br>2<br><b>707</b>                                                                 |
| Je, ulikuwa na miaka mingapi ulipoanza kuishi na mpenzi wako?         | UMRI<br>[10-20]<br>SIJUI                                                         | <input type="text"/><br><input type="text"/><br>88                                   |
| Ulikuwa na umri wa miaka mingapi ulipofanya ngono kwa mara ya kwanza? | SIJAWAHI KUFANYA NGONO<br>CHINI YA MIAKA 7<br>UMRI [7-20]<br>SIJUI               | 0<br>1<br><input type="text"/><br><input type="text"/><br>88<br><b>801</b>           |

|                                                                                                                                                                                  |                                                                                                                           |                                                       |                   |
|----------------------------------------------------------------------------------------------------------------------------------------------------------------------------------|---------------------------------------------------------------------------------------------------------------------------|-------------------------------------------------------|-------------------|
| Ulikuwa na uhusiano gani na mtu wa kwanza uliyefanya ngono naye?<br><br><b>[DO NOT READ OPTIONS]</b>                                                                             | MUME<br>MPENZI<br>"MZEE MPENZI" (BUZI)<br>MTU UNAYEMJUA<br>JAMAA YAKO<br>MWALIMU<br>MTU USIYEMJUA<br>MTU MWINGINE         | 1<br>2<br>3<br>4<br>5<br>6<br>7<br>8                  |                   |
| Je, mtu <u>wa kwanza</u> uliyefanya ngono naye alikuwa na umri mkubwa kuliko wewe, alikuwa mchanga kuliko wewe au alikuwa na umri karibu sawa na wewe?                           | UMRI MKUBWA KULIKO WEWE<br>MCHANGA KULIKO WEWE<br>UMRI KARIBU SAWA NA WEWE<br>SIJUI / SIKUMBUKI                           | 1<br>2<br>3<br>88                                     | 711<br>711<br>711 |
| Je, alikuwa na miaka ngapi zaidi yako?                                                                                                                                           | MKUBWA KWA MIAKA MINGAPI<br><br>SIJUI                                                                                     | <input type="text"/> <input type="text"/><br>88       |                   |
| Mara ya <u>kwanza</u> ulipofanya ngono ulitumia kondomu/mpira?                                                                                                                   | NDIO<br>LA<br>SIJUI / SIKUMBUKI                                                                                           | 1<br>2<br>88                                          |                   |
| Mara ya kwanza ulipofanya ngono, je, ulitaka kufanya ngono, au haukutaka kufanya ngono, ama haukuwa na uhakika kama ulitaka kufanya ngono?                                       | ULITAKA KUFANYA NGONO<br>HUKUTAKA KUFANYA NGONO<br>HAUKUWA NA HAKIKA                                                      | 1<br>2<br>3                                           |                   |
| Sasa ningependa kukuuliza baadhi ya maswali kuhusu utendaji wako wa ngono wa hivi karibuni. Ni lini <u>mara ya mwisho</u> ulipofanya ngono?                                      | LEO/WIKI MOJA HAIJAPITA<br>WIKI MOJA AU ZAIDI ILIYOPITA<br>MWEZI MMOJA ULIOPITA AU ZAIDI<br>MWAKA MMOJA ULIOPITA AU ZAIDI | 1<br>2<br>3<br>4                                      | 716<br>716<br>716 |
| Katika wiki moja iliyopita, ulifanya ngono mara ngapi?                                                                                                                           | MARA NGAPI ULIFANYA NGONO [1-35]<br><br>SIJUI                                                                             | <input type="text"/> <input type="text"/><br>88       |                   |
| Nyakati ulipofanya ngono katika wiki iliyopita, ulitumia kondomu mara ngapi?<br><br><b>[Consistency check: Maximum = previous question]</b>                                      | MARA NGAPI ULITUMIA KONDOMU [1-35]<br><br>HUKUTUMIA KONDOMU<br><br>SIJUI                                                  | <input type="text"/> <input type="text"/><br>77<br>88 |                   |
| Ni nini uhusiano wako na mtu wa mwisho uliyefanya ngono naye?                                                                                                                    | MUME<br>MPENZI<br>"MZEE MPENZI" (BUZI)<br>MTU UNAYEMJUA<br>JAMAA<br>MWALIMU<br>MTU USIYEMJUA<br>MTU MWINGINE              | 1<br>2<br>3<br>4<br>5<br>6<br>7<br>8                  |                   |
| Je, yule mtu wa <u>mwisho</u> uliyefanya ngono naye alikuwa na umri mkubwa kuliko wewe, alikuwa mchanga kuliko wewe, au alikuwa na umri karibu sawa na wewe?                     | UMRI MKUBWA KULIKO WEWE<br>MCHANGA KULIKO WEWE<br>UMRI KARIBU SAWA NA WEWE<br>SIJUI / SIKUMBUKI                           | 1<br>2<br>3<br>88                                     | 720<br>720<br>720 |
| Je, alikuwa na miaka ngapi zaidi yako?                                                                                                                                           | MKUBWA KWA MIAKA MINGAPI<br><br>SIJUI                                                                                     | <input type="text"/> <input type="text"/><br>88       |                   |
| Mara ya <u>mwisho</u> ulipofanya ngono, je, ulitaka kufanya ngono, au haukutaka kufanya ngono, ama haukuwa na uhakika kama ulitaka kufanya ngono?                                | ULITAKA KUFANYA NGONO<br>HUKUTAKA KUFANYA NGONO<br>HAUKUWA NA HAKIKA                                                      | 1<br>2<br>3                                           |                   |
| Je, mara ya mwisho ulipofanya ngono, kondomu ilitumiwa?                                                                                                                          | NDIO<br>LA<br>SIJUI / SIKUMBUKI                                                                                           | 1<br>2<br>88                                          |                   |
| Kwa wastani, ulitumia kondomu mara nyingi kadri gani katika mwaka mmoja uliopita ulipofanya ngono na mtu huyo? Unaweza kusema ni kila mara, wakati mwingine ama hukutumia kamwe? | KILA MARA<br>WAKATI MWINGINE<br>HUKUTUMIA KAMWE                                                                           | 1<br>2<br>3                                           |                   |
| Kama ungependa kupata njia ya kupanga uzazi, je waona kama ingekuwa rahisi, vigumu au isingewezekana kwenda mahali ambapo waweza kupata njia ya kupanga uzazi?                   | RAHISI<br>VIGUMU<br>ISINGEWEZEKANA<br>SIJUI                                                                               | 1<br>2<br>3<br>88                                     |                   |
| <b>[SKIP Q728 IF Q713 IS A YEAR OR MORE AGO]</b>                                                                                                                                 |                                                                                                                           |                                                       |                   |
| Kwa jumla, umefanya ngono na watu wangani tofauti katika miezi                                                                                                                   | IDADI YA WAPENZI KATIKA MIEZI 6 ILIYOPITA [1-35]                                                                          | <input type="text"/> <input type="text"/>             |                   |



|                                                                                                                                                    |                                                                                                                                                                                                                                            |                                                            |                                                           |                    |
|----------------------------------------------------------------------------------------------------------------------------------------------------|--------------------------------------------------------------------------------------------------------------------------------------------------------------------------------------------------------------------------------------------|------------------------------------------------------------|-----------------------------------------------------------|--------------------|
| Kwa jama, umeranya ngono na watu wangapi toratu kaina miezi iliyopita ?                                                                            | SIJUI                                                                                                                                                                                                                                      |                                                            |                                                           | 88                 |
| Sasa nitasoma orodha ya watu wa aina tofauti na ninataka uniambie kama umewahi kufanya ngono na mtu wa aina hiyo.<br><br>[READ THE LIST]           | A. MTALII AU MGENI<br>B. MWAJIRI WAKO<br>C. MTU ALIYE NA UMRI WA MIAKA KUMI AU ZAIDI KULIKO \\<br>D. MWALIMU WAKO<br>E. MTU ALIYEKULIPA UFANYE NGONO NAYE<br>F. MTU ALIYEFUNGA NDOA NA MTU MWINGINE<br>G. SI YEYOTE KATI YA WALIOTAJWA JUU | YES<br>1<br>1<br>1<br>1<br>1<br>1<br>1                     | NO<br>2<br>2<br>2<br>2<br>2<br>2<br>2                     |                    |
| Kwa maswali yafuatayo, tafadhali fikiria mambo uliyoyapitia kisha uniambie kama unakubaliana au hukubiliani na yafuatayo kujihusu.                 |                                                                                                                                                                                                                                            |                                                            |                                                           |                    |
| Hujaweza sikuzote kutumia kondomu wakati ambapo umetaka kuitumia.                                                                                  | UNAKUBALIANA<br>HAUKUBALIAN                                                                                                                                                                                                                |                                                            | 1<br>2                                                    |                    |
| Umefanya ngono na mtu ili akulipie kodi ya nyumba.                                                                                                 | UNAKUBALIANA<br>HAUKUBALIAN                                                                                                                                                                                                                |                                                            | 1<br>2                                                    |                    |
| Umefanya ngono wakati ambapo hujataka kufanya ngono.                                                                                               | UNAKUBALIANA<br>HAUKUBALIAN                                                                                                                                                                                                                |                                                            | 1<br>2                                                    |                    |
| Katika miezi sita iliyopita, je, umefanya ngono na mtu kwa sababu ulihitaji au ulidhani utapata yafuatayo?                                         | a. Chakula<br>b. Makao/mahali pa kukaa<br>c. Karo ya shule<br>d. Taulo za hedhi<br>e. Pesa za kitu kingine<br>f. Chochote kingine                                                                                                          | YES<br>1<br>1<br>1<br>1<br>1<br>1                          | NO<br>2<br>2<br>2<br>2<br>2<br>2                          | SPECIFY<br>SPECIFY |
| Pesa za kitu kingine, eleza _____                                                                                                                  |                                                                                                                                                                                                                                            |                                                            |                                                           |                    |
| Chochote kingine, eleza _____                                                                                                                      |                                                                                                                                                                                                                                            |                                                            |                                                           |                    |
| <b>SECTION 8: MENSTRUATION</b>                                                                                                                     |                                                                                                                                                                                                                                            |                                                            |                                                           |                    |
| <b>QUESTIONS</b>                                                                                                                                   |                                                                                                                                                                                                                                            | <b>RESPONSES</b>                                           |                                                           |                    |
| Je, umeshawahi kusikia kuhusu hedhi ama damu ya mwezi, ambayo pia inajulikana kama 'kupata wageni', 'kuvuja/kuvudza', 'kupata hedhi'?              | YES<br>NO                                                                                                                                                                                                                                  |                                                            | 1<br>2                                                    | 901                |
| Je, ulipata habari kuhusu hedhi <u>MARA YA KWANZA</u> kutoka kwa nani ama wapi?<br><br><b>MORE THAN ONE ANSWER POSSIBLE. CIRCLE ALL THAT APPLY</b> | MOTHER<br>GRANDMOTHER<br>SISTER<br>AUNT<br>FRIEND<br>TEACHER<br>OTHER FAMILY MEMBER<br>NGO/CBO<br>HEALTH WORKER/CLINICIAN/DOCTOR<br>MEDIA<br>OTHER (SPECIFY _____)                                                                         | YES<br>1<br>1<br>1<br>1<br>1<br>1<br>1<br>1<br>1<br>1<br>1 | NO<br>2<br>2<br>2<br>2<br>2<br>2<br>2<br>2<br>2<br>2<br>2 |                    |
| If you said other, please specify _____                                                                                                            |                                                                                                                                                                                                                                            |                                                            |                                                           |                    |
| Je, umeshawahi kupata hedhi/damu ya mwezi?                                                                                                         | YES<br>NO                                                                                                                                                                                                                                  |                                                            | 1<br>2                                                    | 901                |
| Je, ulijua kuhusu hedhi kabla itokee kwako?                                                                                                        | YES<br>NO<br>NO ANSWER                                                                                                                                                                                                                     |                                                            | 1<br>2<br>96                                              |                    |
| Ulianza kupata hedhi ulipokuwa na umri wa miaka mingapi?                                                                                           | AGE<br>[4-20]<br>DON'T KNOW                                                                                                                                                                                                                |                                                            |                                                           | 88                 |
| Je, ulipopata hedhi kwa mara ya kwanza, ulimwambia mtu yo yote?                                                                                    | YES<br>NO                                                                                                                                                                                                                                  |                                                            | 1<br>2                                                    | 808                |
| Je, ulimwambia nani?                                                                                                                               | MOTHER<br>GRANDMOTHER                                                                                                                                                                                                                      | YES<br>1<br>1                                              | NO<br>2<br>2                                              |                    |

| <p><b>MORE THAN ONE ANSWER POSSIBLE. CIRCLE ALL THAT APPLY</b></p>                                                                                               | <p>SISTER 1 2<br/>AUNT 1 2<br/>FRIEND 1 2<br/>TEACHER 1 2<br/>HEALTH FPROFESSIONAL 1 2<br/>OTHER (SPECIFY) 98</p>                                                                                                                                                                                                                                                                                                                                                                                                                                                                                                                                                                                                                      |                             |           |         |                            |            |   |                           |    |              |                           |                     |     |                     |   |   |                      |                         |   |                           |     |                      |                           |   |     |                 |                  |    |                 |                     |    |                                                  |     |           |   |   |                           |       |   |    |     |  |
|------------------------------------------------------------------------------------------------------------------------------------------------------------------|----------------------------------------------------------------------------------------------------------------------------------------------------------------------------------------------------------------------------------------------------------------------------------------------------------------------------------------------------------------------------------------------------------------------------------------------------------------------------------------------------------------------------------------------------------------------------------------------------------------------------------------------------------------------------------------------------------------------------------------|-----------------------------|-----------|---------|----------------------------|------------|---|---------------------------|----|--------------|---------------------------|---------------------|-----|---------------------|---|---|----------------------|-------------------------|---|---------------------------|-----|----------------------|---------------------------|---|-----|-----------------|------------------|----|-----------------|---------------------|----|--------------------------------------------------|-----|-----------|---|---|---------------------------|-------|---|----|-----|--|
| <p>Ni njia ipi kuu wewe hutumia ili kumudu, hedhi yako kwa sasa shuleni na nyumbani?</p>                                                                         | <table border="1"> <thead> <tr> <th></th> <th>AT SCHOOL</th> <th>AT HOME</th> </tr> </thead> <tbody> <tr><td>Sanitary pads (disposable)</td><td>1</td><td>1</td></tr> <tr><td>Tampon</td><td>2</td><td>2</td></tr> <tr><td>Tissue paper/ other paper</td><td>3</td><td>3</td></tr> <tr><td>Cotton wool</td><td>4</td><td>4</td></tr> <tr><td>Old pieces of cloth</td><td>5</td><td>5</td></tr> <tr><td>New peieces of cloth</td><td>6</td><td>6</td></tr> <tr><td>Sanitary pads (reusable)</td><td>7</td><td>7</td></tr> <tr><td>Mattress pieces</td><td>8</td><td>8</td></tr> <tr><td>Other (specify)</td><td>98</td><td>98</td></tr> </tbody> </table>                                                                               |                             | AT SCHOOL | AT HOME | Sanitary pads (disposable) | 1          | 1 | Tampon                    | 2  | 2            | Tissue paper/ other paper | 3                   | 3   | Cotton wool         | 4 | 4 | Old pieces of cloth  | 5                       | 5 | New peieces of cloth      | 6   | 6                    | Sanitary pads (reusable)  | 7 | 7   | Mattress pieces | 8                | 8  | Other (specify) | 98                  | 98 |                                                  |     |           |   |   |                           |       |   |    |     |  |
|                                                                                                                                                                  | AT SCHOOL                                                                                                                                                                                                                                                                                                                                                                                                                                                                                                                                                                                                                                                                                                                              | AT HOME                     |           |         |                            |            |   |                           |    |              |                           |                     |     |                     |   |   |                      |                         |   |                           |     |                      |                           |   |     |                 |                  |    |                 |                     |    |                                                  |     |           |   |   |                           |       |   |    |     |  |
| Sanitary pads (disposable)                                                                                                                                       | 1                                                                                                                                                                                                                                                                                                                                                                                                                                                                                                                                                                                                                                                                                                                                      | 1                           |           |         |                            |            |   |                           |    |              |                           |                     |     |                     |   |   |                      |                         |   |                           |     |                      |                           |   |     |                 |                  |    |                 |                     |    |                                                  |     |           |   |   |                           |       |   |    |     |  |
| Tampon                                                                                                                                                           | 2                                                                                                                                                                                                                                                                                                                                                                                                                                                                                                                                                                                                                                                                                                                                      | 2                           |           |         |                            |            |   |                           |    |              |                           |                     |     |                     |   |   |                      |                         |   |                           |     |                      |                           |   |     |                 |                  |    |                 |                     |    |                                                  |     |           |   |   |                           |       |   |    |     |  |
| Tissue paper/ other paper                                                                                                                                        | 3                                                                                                                                                                                                                                                                                                                                                                                                                                                                                                                                                                                                                                                                                                                                      | 3                           |           |         |                            |            |   |                           |    |              |                           |                     |     |                     |   |   |                      |                         |   |                           |     |                      |                           |   |     |                 |                  |    |                 |                     |    |                                                  |     |           |   |   |                           |       |   |    |     |  |
| Cotton wool                                                                                                                                                      | 4                                                                                                                                                                                                                                                                                                                                                                                                                                                                                                                                                                                                                                                                                                                                      | 4                           |           |         |                            |            |   |                           |    |              |                           |                     |     |                     |   |   |                      |                         |   |                           |     |                      |                           |   |     |                 |                  |    |                 |                     |    |                                                  |     |           |   |   |                           |       |   |    |     |  |
| Old pieces of cloth                                                                                                                                              | 5                                                                                                                                                                                                                                                                                                                                                                                                                                                                                                                                                                                                                                                                                                                                      | 5                           |           |         |                            |            |   |                           |    |              |                           |                     |     |                     |   |   |                      |                         |   |                           |     |                      |                           |   |     |                 |                  |    |                 |                     |    |                                                  |     |           |   |   |                           |       |   |    |     |  |
| New peieces of cloth                                                                                                                                             | 6                                                                                                                                                                                                                                                                                                                                                                                                                                                                                                                                                                                                                                                                                                                                      | 6                           |           |         |                            |            |   |                           |    |              |                           |                     |     |                     |   |   |                      |                         |   |                           |     |                      |                           |   |     |                 |                  |    |                 |                     |    |                                                  |     |           |   |   |                           |       |   |    |     |  |
| Sanitary pads (reusable)                                                                                                                                         | 7                                                                                                                                                                                                                                                                                                                                                                                                                                                                                                                                                                                                                                                                                                                                      | 7                           |           |         |                            |            |   |                           |    |              |                           |                     |     |                     |   |   |                      |                         |   |                           |     |                      |                           |   |     |                 |                  |    |                 |                     |    |                                                  |     |           |   |   |                           |       |   |    |     |  |
| Mattress pieces                                                                                                                                                  | 8                                                                                                                                                                                                                                                                                                                                                                                                                                                                                                                                                                                                                                                                                                                                      | 8                           |           |         |                            |            |   |                           |    |              |                           |                     |     |                     |   |   |                      |                         |   |                           |     |                      |                           |   |     |                 |                  |    |                 |                     |    |                                                  |     |           |   |   |                           |       |   |    |     |  |
| Other (specify)                                                                                                                                                  | 98                                                                                                                                                                                                                                                                                                                                                                                                                                                                                                                                                                                                                                                                                                                                     | 98                          |           |         |                            |            |   |                           |    |              |                           |                     |     |                     |   |   |                      |                         |   |                           |     |                      |                           |   |     |                 |                  |    |                 |                     |    |                                                  |     |           |   |   |                           |       |   |    |     |  |
| <p>Je , kwa kawaida wewe hupata wapi vitu ulivyovitaja?<br/><b>[CHECK ALL THAT APPLY]</b></p>                                                                    | <table border="1"> <thead> <tr> <th></th> <th>YES</th> <th>NO</th> <th></th> </tr> </thead> <tbody> <tr><td>I BUY THEM</td><td></td><td></td><td></td></tr> <tr><td>FROM MY HOME</td><td>1</td><td>2</td><td>811</td></tr> <tr><td>GIVEN BY MOTHER</td><td>1</td><td>2</td><td>811</td></tr> <tr><td>GIVEN BY OTHER RELATIVE</td><td>1</td><td>2</td><td>811</td></tr> <tr><td>FROM SCHOOL</td><td>1</td><td>2</td><td>811</td></tr> <tr><td>FROM FRIENDS</td><td>1</td><td>2</td><td>811</td></tr> <tr><td>GIVEN BY AN NGO/CBO</td><td>1</td><td>2</td><td>811</td></tr> <tr><td>BOYFRIEND</td><td>1</td><td>2</td><td>811</td></tr> <tr><td>OTHER</td><td></td><td>98</td><td>811</td></tr> </tbody> </table>                        |                             | YES       | NO      |                            | I BUY THEM |   |                           |    | FROM MY HOME | 1                         | 2                   | 811 | GIVEN BY MOTHER     | 1 | 2 | 811                  | GIVEN BY OTHER RELATIVE | 1 | 2                         | 811 | FROM SCHOOL          | 1                         | 2 | 811 | FROM FRIENDS    | 1                | 2  | 811             | GIVEN BY AN NGO/CBO | 1  | 2                                                | 811 | BOYFRIEND | 1 | 2 | 811                       | OTHER |   | 98 | 811 |  |
|                                                                                                                                                                  | YES                                                                                                                                                                                                                                                                                                                                                                                                                                                                                                                                                                                                                                                                                                                                    | NO                          |           |         |                            |            |   |                           |    |              |                           |                     |     |                     |   |   |                      |                         |   |                           |     |                      |                           |   |     |                 |                  |    |                 |                     |    |                                                  |     |           |   |   |                           |       |   |    |     |  |
| I BUY THEM                                                                                                                                                       |                                                                                                                                                                                                                                                                                                                                                                                                                                                                                                                                                                                                                                                                                                                                        |                             |           |         |                            |            |   |                           |    |              |                           |                     |     |                     |   |   |                      |                         |   |                           |     |                      |                           |   |     |                 |                  |    |                 |                     |    |                                                  |     |           |   |   |                           |       |   |    |     |  |
| FROM MY HOME                                                                                                                                                     | 1                                                                                                                                                                                                                                                                                                                                                                                                                                                                                                                                                                                                                                                                                                                                      | 2                           | 811       |         |                            |            |   |                           |    |              |                           |                     |     |                     |   |   |                      |                         |   |                           |     |                      |                           |   |     |                 |                  |    |                 |                     |    |                                                  |     |           |   |   |                           |       |   |    |     |  |
| GIVEN BY MOTHER                                                                                                                                                  | 1                                                                                                                                                                                                                                                                                                                                                                                                                                                                                                                                                                                                                                                                                                                                      | 2                           | 811       |         |                            |            |   |                           |    |              |                           |                     |     |                     |   |   |                      |                         |   |                           |     |                      |                           |   |     |                 |                  |    |                 |                     |    |                                                  |     |           |   |   |                           |       |   |    |     |  |
| GIVEN BY OTHER RELATIVE                                                                                                                                          | 1                                                                                                                                                                                                                                                                                                                                                                                                                                                                                                                                                                                                                                                                                                                                      | 2                           | 811       |         |                            |            |   |                           |    |              |                           |                     |     |                     |   |   |                      |                         |   |                           |     |                      |                           |   |     |                 |                  |    |                 |                     |    |                                                  |     |           |   |   |                           |       |   |    |     |  |
| FROM SCHOOL                                                                                                                                                      | 1                                                                                                                                                                                                                                                                                                                                                                                                                                                                                                                                                                                                                                                                                                                                      | 2                           | 811       |         |                            |            |   |                           |    |              |                           |                     |     |                     |   |   |                      |                         |   |                           |     |                      |                           |   |     |                 |                  |    |                 |                     |    |                                                  |     |           |   |   |                           |       |   |    |     |  |
| FROM FRIENDS                                                                                                                                                     | 1                                                                                                                                                                                                                                                                                                                                                                                                                                                                                                                                                                                                                                                                                                                                      | 2                           | 811       |         |                            |            |   |                           |    |              |                           |                     |     |                     |   |   |                      |                         |   |                           |     |                      |                           |   |     |                 |                  |    |                 |                     |    |                                                  |     |           |   |   |                           |       |   |    |     |  |
| GIVEN BY AN NGO/CBO                                                                                                                                              | 1                                                                                                                                                                                                                                                                                                                                                                                                                                                                                                                                                                                                                                                                                                                                      | 2                           | 811       |         |                            |            |   |                           |    |              |                           |                     |     |                     |   |   |                      |                         |   |                           |     |                      |                           |   |     |                 |                  |    |                 |                     |    |                                                  |     |           |   |   |                           |       |   |    |     |  |
| BOYFRIEND                                                                                                                                                        | 1                                                                                                                                                                                                                                                                                                                                                                                                                                                                                                                                                                                                                                                                                                                                      | 2                           | 811       |         |                            |            |   |                           |    |              |                           |                     |     |                     |   |   |                      |                         |   |                           |     |                      |                           |   |     |                 |                  |    |                 |                     |    |                                                  |     |           |   |   |                           |       |   |    |     |  |
| OTHER                                                                                                                                                            |                                                                                                                                                                                                                                                                                                                                                                                                                                                                                                                                                                                                                                                                                                                                        | 98                          | 811       |         |                            |            |   |                           |    |              |                           |                     |     |                     |   |   |                      |                         |   |                           |     |                      |                           |   |     |                 |                  |    |                 |                     |    |                                                  |     |           |   |   |                           |       |   |    |     |  |
| <p>Kama nyingine, (TAJA)</p>                                                                                                                                     | <p>_____</p>                                                                                                                                                                                                                                                                                                                                                                                                                                                                                                                                                                                                                                                                                                                           |                             |           |         |                            |            |   |                           |    |              |                           |                     |     |                     |   |   |                      |                         |   |                           |     |                      |                           |   |     |                 |                  |    |                 |                     |    |                                                  |     |           |   |   |                           |       |   |    |     |  |
| <p>Je, wewe hupata wapi pesa?<br/><b>[CHECK ALL THAT APPLY]</b></p>                                                                                              | <table border="1"> <thead> <tr> <th></th> <th>YES</th> <th>NO</th> </tr> </thead> <tbody> <tr><td>From parents</td><td>1</td><td>2</td></tr> <tr><td>Job (specify job)</td><td>1</td><td>2</td></tr> <tr><td>Own savings</td><td>1</td><td>2</td></tr> <tr><td>Boyfriend</td><td>1</td><td>2</td></tr> <tr><td>Other family member</td><td>1</td><td>2</td></tr> <tr><td>Other</td><td></td><td>98</td></tr> </tbody> </table>                                                                                                                                                                                                                                                                                                         |                             | YES       | NO      | From parents               | 1          | 2 | Job (specify job)         | 1  | 2            | Own savings               | 1                   | 2   | Boyfriend           | 1 | 2 | Other family member  | 1                       | 2 | Other                     |     | 98                   |                           |   |     |                 |                  |    |                 |                     |    |                                                  |     |           |   |   |                           |       |   |    |     |  |
|                                                                                                                                                                  | YES                                                                                                                                                                                                                                                                                                                                                                                                                                                                                                                                                                                                                                                                                                                                    | NO                          |           |         |                            |            |   |                           |    |              |                           |                     |     |                     |   |   |                      |                         |   |                           |     |                      |                           |   |     |                 |                  |    |                 |                     |    |                                                  |     |           |   |   |                           |       |   |    |     |  |
| From parents                                                                                                                                                     | 1                                                                                                                                                                                                                                                                                                                                                                                                                                                                                                                                                                                                                                                                                                                                      | 2                           |           |         |                            |            |   |                           |    |              |                           |                     |     |                     |   |   |                      |                         |   |                           |     |                      |                           |   |     |                 |                  |    |                 |                     |    |                                                  |     |           |   |   |                           |       |   |    |     |  |
| Job (specify job)                                                                                                                                                | 1                                                                                                                                                                                                                                                                                                                                                                                                                                                                                                                                                                                                                                                                                                                                      | 2                           |           |         |                            |            |   |                           |    |              |                           |                     |     |                     |   |   |                      |                         |   |                           |     |                      |                           |   |     |                 |                  |    |                 |                     |    |                                                  |     |           |   |   |                           |       |   |    |     |  |
| Own savings                                                                                                                                                      | 1                                                                                                                                                                                                                                                                                                                                                                                                                                                                                                                                                                                                                                                                                                                                      | 2                           |           |         |                            |            |   |                           |    |              |                           |                     |     |                     |   |   |                      |                         |   |                           |     |                      |                           |   |     |                 |                  |    |                 |                     |    |                                                  |     |           |   |   |                           |       |   |    |     |  |
| Boyfriend                                                                                                                                                        | 1                                                                                                                                                                                                                                                                                                                                                                                                                                                                                                                                                                                                                                                                                                                                      | 2                           |           |         |                            |            |   |                           |    |              |                           |                     |     |                     |   |   |                      |                         |   |                           |     |                      |                           |   |     |                 |                  |    |                 |                     |    |                                                  |     |           |   |   |                           |       |   |    |     |  |
| Other family member                                                                                                                                              | 1                                                                                                                                                                                                                                                                                                                                                                                                                                                                                                                                                                                                                                                                                                                                      | 2                           |           |         |                            |            |   |                           |    |              |                           |                     |     |                     |   |   |                      |                         |   |                           |     |                      |                           |   |     |                 |                  |    |                 |                     |    |                                                  |     |           |   |   |                           |       |   |    |     |  |
| Other                                                                                                                                                            |                                                                                                                                                                                                                                                                                                                                                                                                                                                                                                                                                                                                                                                                                                                                        | 98                          |           |         |                            |            |   |                           |    |              |                           |                     |     |                     |   |   |                      |                         |   |                           |     |                      |                           |   |     |                 |                  |    |                 |                     |    |                                                  |     |           |   |   |                           |       |   |    |     |  |
| <p>Kama nyingine, (TAJA)</p>                                                                                                                                     | <p>_____</p>                                                                                                                                                                                                                                                                                                                                                                                                                                                                                                                                                                                                                                                                                                                           |                             |           |         |                            |            |   |                           |    |              |                           |                     |     |                     |   |   |                      |                         |   |                           |     |                      |                           |   |     |                 |                  |    |                 |                     |    |                                                  |     |           |   |   |                           |       |   |    |     |  |
| <p>Mbali na njia kuu uliotaja, wewe hutumia nini kingine kuikabili hedhi yako?<br/><b>[CHECK ALL THAT APPLY]</b></p>                                             | <table border="1"> <thead> <tr> <th></th> <th>YES</th> <th>NO</th> </tr> </thead> <tbody> <tr><td>Sanitary pads (disposable)</td><td></td><td></td></tr> <tr><td>Tampon</td><td>1</td><td>2</td></tr> <tr><td>Tissue paper/ other paper</td><td>1</td><td>2</td></tr> <tr><td>Cotton wool</td><td>1</td><td>2</td></tr> <tr><td>Old pieces of cloth</td><td>1</td><td>2</td></tr> <tr><td>New peieces of cloth</td><td>1</td><td>2</td></tr> <tr><td>Sanitary towel (reusable)</td><td>1</td><td>2</td></tr> <tr><td>Mattress pieces</td><td>1</td><td>2</td></tr> <tr><td>Other (SPECIFY)</td><td>1</td><td>2</td></tr> </tbody> </table>                                                                                             |                             | YES       | NO      | Sanitary pads (disposable) |            |   | Tampon                    | 1  | 2            | Tissue paper/ other paper | 1                   | 2   | Cotton wool         | 1 | 2 | Old pieces of cloth  | 1                       | 2 | New peieces of cloth      | 1   | 2                    | Sanitary towel (reusable) | 1 | 2   | Mattress pieces | 1                | 2  | Other (SPECIFY) | 1                   | 2  | <p><b>IF NO ON ALL, SKIP 813</b></p>             |     |           |   |   |                           |       |   |    |     |  |
|                                                                                                                                                                  | YES                                                                                                                                                                                                                                                                                                                                                                                                                                                                                                                                                                                                                                                                                                                                    | NO                          |           |         |                            |            |   |                           |    |              |                           |                     |     |                     |   |   |                      |                         |   |                           |     |                      |                           |   |     |                 |                  |    |                 |                     |    |                                                  |     |           |   |   |                           |       |   |    |     |  |
| Sanitary pads (disposable)                                                                                                                                       |                                                                                                                                                                                                                                                                                                                                                                                                                                                                                                                                                                                                                                                                                                                                        |                             |           |         |                            |            |   |                           |    |              |                           |                     |     |                     |   |   |                      |                         |   |                           |     |                      |                           |   |     |                 |                  |    |                 |                     |    |                                                  |     |           |   |   |                           |       |   |    |     |  |
| Tampon                                                                                                                                                           | 1                                                                                                                                                                                                                                                                                                                                                                                                                                                                                                                                                                                                                                                                                                                                      | 2                           |           |         |                            |            |   |                           |    |              |                           |                     |     |                     |   |   |                      |                         |   |                           |     |                      |                           |   |     |                 |                  |    |                 |                     |    |                                                  |     |           |   |   |                           |       |   |    |     |  |
| Tissue paper/ other paper                                                                                                                                        | 1                                                                                                                                                                                                                                                                                                                                                                                                                                                                                                                                                                                                                                                                                                                                      | 2                           |           |         |                            |            |   |                           |    |              |                           |                     |     |                     |   |   |                      |                         |   |                           |     |                      |                           |   |     |                 |                  |    |                 |                     |    |                                                  |     |           |   |   |                           |       |   |    |     |  |
| Cotton wool                                                                                                                                                      | 1                                                                                                                                                                                                                                                                                                                                                                                                                                                                                                                                                                                                                                                                                                                                      | 2                           |           |         |                            |            |   |                           |    |              |                           |                     |     |                     |   |   |                      |                         |   |                           |     |                      |                           |   |     |                 |                  |    |                 |                     |    |                                                  |     |           |   |   |                           |       |   |    |     |  |
| Old pieces of cloth                                                                                                                                              | 1                                                                                                                                                                                                                                                                                                                                                                                                                                                                                                                                                                                                                                                                                                                                      | 2                           |           |         |                            |            |   |                           |    |              |                           |                     |     |                     |   |   |                      |                         |   |                           |     |                      |                           |   |     |                 |                  |    |                 |                     |    |                                                  |     |           |   |   |                           |       |   |    |     |  |
| New peieces of cloth                                                                                                                                             | 1                                                                                                                                                                                                                                                                                                                                                                                                                                                                                                                                                                                                                                                                                                                                      | 2                           |           |         |                            |            |   |                           |    |              |                           |                     |     |                     |   |   |                      |                         |   |                           |     |                      |                           |   |     |                 |                  |    |                 |                     |    |                                                  |     |           |   |   |                           |       |   |    |     |  |
| Sanitary towel (reusable)                                                                                                                                        | 1                                                                                                                                                                                                                                                                                                                                                                                                                                                                                                                                                                                                                                                                                                                                      | 2                           |           |         |                            |            |   |                           |    |              |                           |                     |     |                     |   |   |                      |                         |   |                           |     |                      |                           |   |     |                 |                  |    |                 |                     |    |                                                  |     |           |   |   |                           |       |   |    |     |  |
| Mattress pieces                                                                                                                                                  | 1                                                                                                                                                                                                                                                                                                                                                                                                                                                                                                                                                                                                                                                                                                                                      | 2                           |           |         |                            |            |   |                           |    |              |                           |                     |     |                     |   |   |                      |                         |   |                           |     |                      |                           |   |     |                 |                  |    |                 |                     |    |                                                  |     |           |   |   |                           |       |   |    |     |  |
| Other (SPECIFY)                                                                                                                                                  | 1                                                                                                                                                                                                                                                                                                                                                                                                                                                                                                                                                                                                                                                                                                                                      | 2                           |           |         |                            |            |   |                           |    |              |                           |                     |     |                     |   |   |                      |                         |   |                           |     |                      |                           |   |     |                 |                  |    |                 |                     |    |                                                  |     |           |   |   |                           |       |   |    |     |  |
| <p>Kama nyingine, (TAJA)</p>                                                                                                                                     | <p>_____</p>                                                                                                                                                                                                                                                                                                                                                                                                                                                                                                                                                                                                                                                                                                                           |                             |           |         |                            |            |   |                           |    |              |                           |                     |     |                     |   |   |                      |                         |   |                           |     |                      |                           |   |     |                 |                  |    |                 |                     |    |                                                  |     |           |   |   |                           |       |   |    |     |  |
| <p>Kati ya njia unazotumia, je, unapendelea njia ipi sana?</p>                                                                                                   | <table border="1"> <tbody> <tr><td>Sanitary towel (disposable)</td><td></td><td>1</td></tr> <tr><td>Tampon</td><td></td><td>2</td></tr> <tr><td>Tissue paper/ other paper</td><td></td><td>3</td></tr> <tr><td>Cotton wool</td><td></td><td>4</td></tr> <tr><td>Old pieces of cloth</td><td></td><td>5</td></tr> <tr><td>New peieces of cloth</td><td></td><td>6</td></tr> <tr><td>Sanitary towel (reusable)</td><td></td><td>7</td></tr> <tr><td>Mattress pieces</td><td></td><td>8</td></tr> <tr><td>Other (SPECIFY)</td><td></td><td>98</td></tr> </tbody> </table>                                                                                                                                                                 | Sanitary towel (disposable) |           | 1       | Tampon                     |            | 2 | Tissue paper/ other paper |    | 3            | Cotton wool               |                     | 4   | Old pieces of cloth |   | 5 | New peieces of cloth |                         | 6 | Sanitary towel (reusable) |     | 7                    | Mattress pieces           |   | 8   | Other (SPECIFY) |                  | 98 |                 |                     |    |                                                  |     |           |   |   |                           |       |   |    |     |  |
| Sanitary towel (disposable)                                                                                                                                      |                                                                                                                                                                                                                                                                                                                                                                                                                                                                                                                                                                                                                                                                                                                                        | 1                           |           |         |                            |            |   |                           |    |              |                           |                     |     |                     |   |   |                      |                         |   |                           |     |                      |                           |   |     |                 |                  |    |                 |                     |    |                                                  |     |           |   |   |                           |       |   |    |     |  |
| Tampon                                                                                                                                                           |                                                                                                                                                                                                                                                                                                                                                                                                                                                                                                                                                                                                                                                                                                                                        | 2                           |           |         |                            |            |   |                           |    |              |                           |                     |     |                     |   |   |                      |                         |   |                           |     |                      |                           |   |     |                 |                  |    |                 |                     |    |                                                  |     |           |   |   |                           |       |   |    |     |  |
| Tissue paper/ other paper                                                                                                                                        |                                                                                                                                                                                                                                                                                                                                                                                                                                                                                                                                                                                                                                                                                                                                        | 3                           |           |         |                            |            |   |                           |    |              |                           |                     |     |                     |   |   |                      |                         |   |                           |     |                      |                           |   |     |                 |                  |    |                 |                     |    |                                                  |     |           |   |   |                           |       |   |    |     |  |
| Cotton wool                                                                                                                                                      |                                                                                                                                                                                                                                                                                                                                                                                                                                                                                                                                                                                                                                                                                                                                        | 4                           |           |         |                            |            |   |                           |    |              |                           |                     |     |                     |   |   |                      |                         |   |                           |     |                      |                           |   |     |                 |                  |    |                 |                     |    |                                                  |     |           |   |   |                           |       |   |    |     |  |
| Old pieces of cloth                                                                                                                                              |                                                                                                                                                                                                                                                                                                                                                                                                                                                                                                                                                                                                                                                                                                                                        | 5                           |           |         |                            |            |   |                           |    |              |                           |                     |     |                     |   |   |                      |                         |   |                           |     |                      |                           |   |     |                 |                  |    |                 |                     |    |                                                  |     |           |   |   |                           |       |   |    |     |  |
| New peieces of cloth                                                                                                                                             |                                                                                                                                                                                                                                                                                                                                                                                                                                                                                                                                                                                                                                                                                                                                        | 6                           |           |         |                            |            |   |                           |    |              |                           |                     |     |                     |   |   |                      |                         |   |                           |     |                      |                           |   |     |                 |                  |    |                 |                     |    |                                                  |     |           |   |   |                           |       |   |    |     |  |
| Sanitary towel (reusable)                                                                                                                                        |                                                                                                                                                                                                                                                                                                                                                                                                                                                                                                                                                                                                                                                                                                                                        | 7                           |           |         |                            |            |   |                           |    |              |                           |                     |     |                     |   |   |                      |                         |   |                           |     |                      |                           |   |     |                 |                  |    |                 |                     |    |                                                  |     |           |   |   |                           |       |   |    |     |  |
| Mattress pieces                                                                                                                                                  |                                                                                                                                                                                                                                                                                                                                                                                                                                                                                                                                                                                                                                                                                                                                        | 8                           |           |         |                            |            |   |                           |    |              |                           |                     |     |                     |   |   |                      |                         |   |                           |     |                      |                           |   |     |                 |                  |    |                 |                     |    |                                                  |     |           |   |   |                           |       |   |    |     |  |
| Other (SPECIFY)                                                                                                                                                  |                                                                                                                                                                                                                                                                                                                                                                                                                                                                                                                                                                                                                                                                                                                                        | 98                          |           |         |                            |            |   |                           |    |              |                           |                     |     |                     |   |   |                      |                         |   |                           |     |                      |                           |   |     |                 |                  |    |                 |                     |    |                                                  |     |           |   |   |                           |       |   |    |     |  |
| <p>Sasa nitakuuliza maswali mengine zaidi kuhusu jinsi unavyoikabili hedhi yako shuleni, na jinsi unavyoikabili hedhi yako nyumbani.</p>                         |                                                                                                                                                                                                                                                                                                                                                                                                                                                                                                                                                                                                                                                                                                                                        |                             |           |         |                            |            |   |                           |    |              |                           |                     |     |                     |   |   |                      |                         |   |                           |     |                      |                           |   |     |                 |                  |    |                 |                     |    |                                                  |     |           |   |   |                           |       |   |    |     |  |
| <p>Je, wewe hukabiliana vipi na uchungu au tumbo kuuma wakati wa hedhi yako?<br/><b>[Check all that apply]</b></p>                                               | <table border="1"> <thead> <tr> <th></th> <th colspan="2">AT SCHOOL</th> <th colspan="2">AT HOME</th> </tr> <tr> <th></th> <th>YES</th> <th>NO</th> <th>YES</th> <th>NO</th> </tr> </thead> <tbody> <tr><td>Did not do anything</td><td>1</td><td>2</td><td>1</td><td>2</td></tr> <tr><td>Took medication</td><td>1</td><td>2</td><td>1</td><td>2</td></tr> <tr><td>Did not go to school</td><td>1</td><td>2</td><td>1</td><td>2</td></tr> <tr><td>Goes to hospital</td><td>1</td><td>2</td><td>1</td><td>2</td></tr> <tr><td>Used alternative pain medication. (SPECIFY_____)</td><td>1</td><td>2</td><td>1</td><td>2</td></tr> <tr><td>Does not have pain/cramps</td><td>1</td><td>2</td><td>1</td><td>2</td></tr> </tbody> </table> |                             | AT SCHOOL |         | AT HOME                    |            |   | YES                       | NO | YES          | NO                        | Did not do anything | 1   | 2                   | 1 | 2 | Took medication      | 1                       | 2 | 1                         | 2   | Did not go to school | 1                         | 2 | 1   | 2               | Goes to hospital | 1  | 2               | 1                   | 2  | Used alternative pain medication. (SPECIFY_____) | 1   | 2         | 1 | 2 | Does not have pain/cramps | 1     | 2 | 1  | 2   |  |
|                                                                                                                                                                  | AT SCHOOL                                                                                                                                                                                                                                                                                                                                                                                                                                                                                                                                                                                                                                                                                                                              |                             | AT HOME   |         |                            |            |   |                           |    |              |                           |                     |     |                     |   |   |                      |                         |   |                           |     |                      |                           |   |     |                 |                  |    |                 |                     |    |                                                  |     |           |   |   |                           |       |   |    |     |  |
|                                                                                                                                                                  | YES                                                                                                                                                                                                                                                                                                                                                                                                                                                                                                                                                                                                                                                                                                                                    | NO                          | YES       | NO      |                            |            |   |                           |    |              |                           |                     |     |                     |   |   |                      |                         |   |                           |     |                      |                           |   |     |                 |                  |    |                 |                     |    |                                                  |     |           |   |   |                           |       |   |    |     |  |
| Did not do anything                                                                                                                                              | 1                                                                                                                                                                                                                                                                                                                                                                                                                                                                                                                                                                                                                                                                                                                                      | 2                           | 1         | 2       |                            |            |   |                           |    |              |                           |                     |     |                     |   |   |                      |                         |   |                           |     |                      |                           |   |     |                 |                  |    |                 |                     |    |                                                  |     |           |   |   |                           |       |   |    |     |  |
| Took medication                                                                                                                                                  | 1                                                                                                                                                                                                                                                                                                                                                                                                                                                                                                                                                                                                                                                                                                                                      | 2                           | 1         | 2       |                            |            |   |                           |    |              |                           |                     |     |                     |   |   |                      |                         |   |                           |     |                      |                           |   |     |                 |                  |    |                 |                     |    |                                                  |     |           |   |   |                           |       |   |    |     |  |
| Did not go to school                                                                                                                                             | 1                                                                                                                                                                                                                                                                                                                                                                                                                                                                                                                                                                                                                                                                                                                                      | 2                           | 1         | 2       |                            |            |   |                           |    |              |                           |                     |     |                     |   |   |                      |                         |   |                           |     |                      |                           |   |     |                 |                  |    |                 |                     |    |                                                  |     |           |   |   |                           |       |   |    |     |  |
| Goes to hospital                                                                                                                                                 | 1                                                                                                                                                                                                                                                                                                                                                                                                                                                                                                                                                                                                                                                                                                                                      | 2                           | 1         | 2       |                            |            |   |                           |    |              |                           |                     |     |                     |   |   |                      |                         |   |                           |     |                      |                           |   |     |                 |                  |    |                 |                     |    |                                                  |     |           |   |   |                           |       |   |    |     |  |
| Used alternative pain medication. (SPECIFY_____)                                                                                                                 | 1                                                                                                                                                                                                                                                                                                                                                                                                                                                                                                                                                                                                                                                                                                                                      | 2                           | 1         | 2       |                            |            |   |                           |    |              |                           |                     |     |                     |   |   |                      |                         |   |                           |     |                      |                           |   |     |                 |                  |    |                 |                     |    |                                                  |     |           |   |   |                           |       |   |    |     |  |
| Does not have pain/cramps                                                                                                                                        | 1                                                                                                                                                                                                                                                                                                                                                                                                                                                                                                                                                                                                                                                                                                                                      | 2                           | 1         | 2       |                            |            |   |                           |    |              |                           |                     |     |                     |   |   |                      |                         |   |                           |     |                      |                           |   |     |                 |                  |    |                 |                     |    |                                                  |     |           |   |   |                           |       |   |    |     |  |
| <p>Je, wewe hubadilisha taalo za hedhi/vitu vingine?<br/><b>[If never used pads ask about other materials used]</b></p>                                          | <table border="1"> <thead> <tr> <th></th> <th>AT SCHOOL</th> <th>AT HOME</th> </tr> </thead> <tbody> <tr><td>YES</td><td>1</td><td>1</td></tr> <tr><td>NO</td><td>2</td><td>2</td></tr> <tr><td>N/A</td><td>97</td><td>97</td></tr> </tbody> </table> <p><b>[IF NO FOR BOTH]</b></p>                                                                                                                                                                                                                                                                                                                                                                                                                                                   |                             | AT SCHOOL | AT HOME | YES                        | 1          | 1 | NO                        | 2  | 2            | N/A                       | 97                  | 97  | <p>821</p>          |   |   |                      |                         |   |                           |     |                      |                           |   |     |                 |                  |    |                 |                     |    |                                                  |     |           |   |   |                           |       |   |    |     |  |
|                                                                                                                                                                  | AT SCHOOL                                                                                                                                                                                                                                                                                                                                                                                                                                                                                                                                                                                                                                                                                                                              | AT HOME                     |           |         |                            |            |   |                           |    |              |                           |                     |     |                     |   |   |                      |                         |   |                           |     |                      |                           |   |     |                 |                  |    |                 |                     |    |                                                  |     |           |   |   |                           |       |   |    |     |  |
| YES                                                                                                                                                              | 1                                                                                                                                                                                                                                                                                                                                                                                                                                                                                                                                                                                                                                                                                                                                      | 1                           |           |         |                            |            |   |                           |    |              |                           |                     |     |                     |   |   |                      |                         |   |                           |     |                      |                           |   |     |                 |                  |    |                 |                     |    |                                                  |     |           |   |   |                           |       |   |    |     |  |
| NO                                                                                                                                                               | 2                                                                                                                                                                                                                                                                                                                                                                                                                                                                                                                                                                                                                                                                                                                                      | 2                           |           |         |                            |            |   |                           |    |              |                           |                     |     |                     |   |   |                      |                         |   |                           |     |                      |                           |   |     |                 |                  |    |                 |                     |    |                                                  |     |           |   |   |                           |       |   |    |     |  |
| N/A                                                                                                                                                              | 97                                                                                                                                                                                                                                                                                                                                                                                                                                                                                                                                                                                                                                                                                                                                     | 97                          |           |         |                            |            |   |                           |    |              |                           |                     |     |                     |   |   |                      |                         |   |                           |     |                      |                           |   |     |                 |                  |    |                 |                     |    |                                                  |     |           |   |   |                           |       |   |    |     |  |
| <p>Je, unaweza kubadilisha taalo za hedhi/vitu vingine kwa usiri mara ngapi? Unaweza kusema kila mara, wakati mwingine, mara/mara moja moja au hiwezi kamwe?</p> | <table border="1"> <thead> <tr> <th></th> <th>AT SCHOOL</th> <th>AT HOME</th> </tr> </thead> <tbody> <tr><td>Always</td><td>1</td><td>1</td></tr> <tr><td>Sometimes</td><td>2</td><td>2</td></tr> </tbody> </table>                                                                                                                                                                                                                                                                                                                                                                                                                                                                                                                    |                             | AT SCHOOL | AT HOME | Always                     | 1          | 1 | Sometimes                 | 2  | 2            |                           |                     |     |                     |   |   |                      |                         |   |                           |     |                      |                           |   |     |                 |                  |    |                 |                     |    |                                                  |     |           |   |   |                           |       |   |    |     |  |
|                                                                                                                                                                  | AT SCHOOL                                                                                                                                                                                                                                                                                                                                                                                                                                                                                                                                                                                                                                                                                                                              | AT HOME                     |           |         |                            |            |   |                           |    |              |                           |                     |     |                     |   |   |                      |                         |   |                           |     |                      |                           |   |     |                 |                  |    |                 |                     |    |                                                  |     |           |   |   |                           |       |   |    |     |  |
| Always                                                                                                                                                           | 1                                                                                                                                                                                                                                                                                                                                                                                                                                                                                                                                                                                                                                                                                                                                      | 1                           |           |         |                            |            |   |                           |    |              |                           |                     |     |                     |   |   |                      |                         |   |                           |     |                      |                           |   |     |                 |                  |    |                 |                     |    |                                                  |     |           |   |   |                           |       |   |    |     |  |
| Sometimes                                                                                                                                                        | 2                                                                                                                                                                                                                                                                                                                                                                                                                                                                                                                                                                                                                                                                                                                                      | 2                           |           |         |                            |            |   |                           |    |              |                           |                     |     |                     |   |   |                      |                         |   |                           |     |                      |                           |   |     |                 |                  |    |                 |                     |    |                                                  |     |           |   |   |                           |       |   |    |     |  |

|                                                                                                                                                                        |                                                                                                                                                                                                |                                                                                 |                                           |               |
|------------------------------------------------------------------------------------------------------------------------------------------------------------------------|------------------------------------------------------------------------------------------------------------------------------------------------------------------------------------------------|---------------------------------------------------------------------------------|-------------------------------------------|---------------|
|                                                                                                                                                                        | Rarely<br>Never<br>You did not need to change                                                                                                                                                  | 3<br>4<br>8                                                                     | 3<br>4<br>8                               |               |
| Je, wewe hubadilishia wapi taulo ya hedhi/vitu vingine?                                                                                                                | <b>AT SCHOOL</b><br>Toilet<br>Classroom/room at home<br>Changed outside<br>Other (SPECIFY_____)<br>Not Applicable                                                                              | <b>AT HOME</b><br>1<br>2<br>3<br>98<br>97                                       | <b>AT HOME</b><br>1<br>2<br>3<br>98<br>97 |               |
| Je, wewe huweza kusafisha mikono baada ya kubadilisha?                                                                                                                 | YES<br>NO<br><b>[IF NO FOR BOTH]</b>                                                                                                                                                           | 1<br>2                                                                          | 1<br>2                                    | 819           |
| Je, wewe hutumia nini kunawa mikono baada ya kubadilisha?                                                                                                              | <b>AT SCHOOL</b><br>YES NO<br>Soapy water<br>Soap<br>Water<br>Wet cloth<br>Dry cloth<br>Other<br>None                                                                                          | <b>AT HOME</b><br>YES NO<br>1 2<br>1 2<br>1 2<br>1 2<br>1 2<br>1 2<br>1 2       |                                           |               |
| Je, unaweza kutupa taulo za hedhi/vitu vingine vilivyotumiwa mara mingi kiasi gani? Unaweza kusema ni kila mara, wakati mwingine, nadra/mara moja moja au huwezi kamwe | ALWAYS<br>SOMETIMES<br>NEVER<br>RARELY<br>N/A                                                                                                                                                  | 1<br>2<br>3<br>4<br>8                                                           | 2<br>2<br>3<br>4<br>8                     |               |
| Je, wewe hutupa wapi taulo za hedhi/vitu vingine ulivyotumia?<br><b>[Check all that apply]</b>                                                                         | <b>AT SCHOOL</b><br>INSIDE LATRINE<br>LATRINE FLOOR<br>BIN<br>DROP IN FIELD<br>BURN IN FIELD<br>TAKE TO SCHOOL/HOME<br>DROP ON WAY TO SCHOOL/HOME<br>RIVER, LAKE, POND<br>OTHER (SPECIFY_____) | <b>AT HOME</b><br>YES NO<br>1 2<br>1 2<br>1 2<br>1 2<br>1 2<br>1 2<br>1 2<br>98 |                                           |               |
| Je, katika miezi mitatu iliyopita, ulipata hedhi kila mwezi?                                                                                                           | YES<br>NO                                                                                                                                                                                      |                                                                                 | 1<br>2                                    |               |
| Je, hedhi yako ya mwisho ilikuwa tarehe ngapi?<br><b>Note: First date when it started</b>                                                                              | Date of period                                                                                                                                                                                 |                                                                                 |                                           |               |
| Je, hedhi yako ya mwisho ilikuwa kwa siku ngapi?                                                                                                                       | Total days                                                                                                                                                                                     |                                                                                 |                                           |               |
| Wakati wa hedhi yako ya mwisho ulipata uchungu au kuumwa na tumbo?                                                                                                     | YES<br>NO                                                                                                                                                                                      |                                                                                 | 1<br>2                                    |               |
| Je, damu imewahi kuvuja hadi kwa mwili wako au nguo ukiwa shuleni                                                                                                      | YES<br>NO                                                                                                                                                                                      |                                                                                 | 1<br>2                                    | <b>FILTER</b> |
| Kama ndio, imefanyika mara mingi kiasi gani?<br><b>READ LIST</b>                                                                                                       | KILA MARA (KILA HEDHI)<br>WAKATI MWINGINE<br>NADRA (MARA MOJA AU MBILI)<br>HAIJAWAHI KUFANYIKA                                                                                                 |                                                                                 | 1<br>2<br>3<br>4                          |               |
| Je, ulitumia nini ukiwa shule kuosha hiyo da                                                                                                                           | SOAPY WATER<br>SOAP AND WATER<br>WATER<br>WET CLOTH<br>DRY CLOTH<br>NONE<br>OTHER (SPECIFY)                                                                                                    |                                                                                 | 1<br>2<br>3<br>4<br>5<br>6<br>98          |               |
| <b>[IF USED PADS IN Q808 OR Q811, SKIP 829]</b>                                                                                                                        |                                                                                                                                                                                                |                                                                                 |                                           | 829           |
| Je, umewahi kutumia taulo za hedhi?                                                                                                                                    | YES<br>NO                                                                                                                                                                                      |                                                                                 | 1<br>2                                    | 834           |
| Kwa wastani, wewe hutumia taulo ngapi za hedhi kila mwezi unapokuwa na hedhi?                                                                                          | Total number                                                                                                                                                                                   |                                                                                 |                                           |               |

|                                                                                                                                                    |                                                                                                                                                                                                                    |                                                                                 |            |            |
|----------------------------------------------------------------------------------------------------------------------------------------------------|--------------------------------------------------------------------------------------------------------------------------------------------------------------------------------------------------------------------|---------------------------------------------------------------------------------|------------|------------|
| Ikiwa uko na zingine zimebaki, wakati mwingine wewe hugawanya na mtu yeyote hizo taulo za hedhi?                                                   | YES<br>NO                                                                                                                                                                                                          | 1<br>2                                                                          | 832        |            |
| Kama mnagawanya, wewe hugawana na nani?<br><br>[Check all that apply]                                                                              | MOTHER<br>SISTER<br>CLASSMATES<br>FRIENDS WHO ARE NOT CLASSMATES<br>OTHER RELATIVE<br>TEACHER<br>OTHER (SPECIFY _____)                                                                                             | YES<br>1<br>1<br>1<br>1<br>1<br>1<br>1<br>NO<br>2<br>2<br>2<br>2<br>2<br>2<br>2 |            |            |
| Kama ndio, taja _____                                                                                                                              |                                                                                                                                                                                                                    |                                                                                 |            |            |
| Je, unahisi kuwa unazo taulo za hedhi za kutosha kukabili hedhi yako vyema?                                                                        | YES<br>NO                                                                                                                                                                                                          | 1<br>2                                                                          |            |            |
| Kwa siku/masaa 24, wewe hubadilisha taulo za hedhi kama mara ngapi?                                                                                | Once a day<br>Twice a day (Once every 12hours)<br>Three times a day (Once every 8hours)<br>More than three times a day / Once every 7hours or less<br>None<br>Other (SPECIFY _____)                                | 1<br>2<br>3<br>4<br>5<br>98                                                     |            |            |
| Je, ulipokea taulo za hedhi shuleni muhula huu/muhula uliopita?                                                                                    | YES<br>NO                                                                                                                                                                                                          | 1<br>2                                                                          | 838        |            |
| Kama ndio, ulipewa tu hizo taulo za hedhi ama ilibidi uombe?                                                                                       | Just given<br>Asked for them                                                                                                                                                                                       | 1<br>2                                                                          |            |            |
| Je, mara ya mwisho ulipokea taulo za hedhi shuleni, ulipokea pakiti tatu au zaidi, pakiti mbili, pakiti moja au chache kuliko pakiti moja?         | Three or more packets<br>Two packets<br>One packet<br>Less than a packet                                                                                                                                           | 1<br>2<br>3<br>4                                                                |            |            |
| Katika muhula uliopita, ulipokea taulo za hedhi mara nyingi kiasi gani shuleni?                                                                    | Once or twice per term<br>Three or more times per term                                                                                                                                                             | 1<br>2                                                                          |            |            |
| Niambie unafikiria taarifa zifuatazo ni kweli kwako kwa kiasi gani? Kwa kila taarifa, tafadhali niambie kama unakubali, unakataa ama hauna hakika. |                                                                                                                                                                                                                    |                                                                                 |            |            |
|                                                                                                                                                    | Unakubali                                                                                                                                                                                                          | Unakataa                                                                        | hauna haki | Don't know |
| a. Mimi huona aibu kwasababu ya mwili wangu wakati niko kwa hedhi                                                                                  | 1                                                                                                                                                                                                                  | 2                                                                               | 3          | 88         |
| b. Mimi huwa sijihisi vizuri mwilini wakati wa hedhi                                                                                               | 1                                                                                                                                                                                                                  | 2                                                                               | 3          | 88         |
| c. Ni muhimu kuweka hedhi yangu siri kwa mtu yeyote                                                                                                | 1                                                                                                                                                                                                                  | 2                                                                               | 3          | 88         |
| d. Najivunia kuwa na hedhi                                                                                                                         | 1                                                                                                                                                                                                                  | 2                                                                               | 3          | 88         |
| e. Natamani nisingewahi kupata hedhi                                                                                                               | 1                                                                                                                                                                                                                  | 2                                                                               | 3          | 88         |
| f. Msichana anaweza kijuhusisha na michezo wakati wa hedhi                                                                                         | 1                                                                                                                                                                                                                  | 2                                                                               | 3          | 88         |
| g. Ni rahisi kuwa makini darasani wakati niko kwenye hedhi                                                                                         | 1                                                                                                                                                                                                                  | 2                                                                               | 3          | 88         |
| h. Hedhi/damu ya mwezi ni ugonjwa                                                                                                                  | 1                                                                                                                                                                                                                  | 2                                                                               | 3          | 88         |
| i. Msichana akiwa kwenye hedhi huwa sio msafi                                                                                                      | 1                                                                                                                                                                                                                  | 2                                                                               | 3          | 88         |
| j. Wavulana wanaweza kujua wakati wasichana wako kwenye hedhi                                                                                      | 1                                                                                                                                                                                                                  | 2                                                                               | 3          | 88         |
| k. Kupata hedhi/damu ya mwezi ni jambo la kawaida kwa wasichana                                                                                    | 1                                                                                                                                                                                                                  | 2                                                                               | 3          | 88         |
| l. Mtu hafai kuoga wakati wa hedhi                                                                                                                 | 1                                                                                                                                                                                                                  | 2                                                                               | 3          | 88         |
| m. Wasichana wote ambao wamewahi kupata hedhi wako katika hatari ya kupata mimba wakifanya ngono                                                   | 1                                                                                                                                                                                                                  | 2                                                                               | 3          | 88         |
| n. Msichana hafai kuona haya akichafua nguo yake na damu akiwa shuleni wakati wa hedhi                                                             | 1                                                                                                                                                                                                                  | 2                                                                               | 3          | 88         |
| Je, kuna shughuli ambazo umekatazwa na mtu yeyote kufanya wakati uko kwenye hedhi?                                                                 | Yes<br>No                                                                                                                                                                                                          | 1<br>2                                                                          | 841        |            |
| Kama ndio, ni shughuli zipi?<br><br>[CHECK ALL THAT APPLY]                                                                                         | Going to school<br>Going to church/mosque<br>Going to market<br>Cooking for the family<br>Interacting with other family members<br>Interacting with neighbors<br>Interacting with men/boys<br>Playing games/sports | YES<br>1<br>1<br>1<br>1<br>1<br>1<br>1<br>NO<br>2<br>2<br>2<br>2<br>2<br>2<br>2 |            |            |

|                                                                                                                                                                                                                 |                                                                                                                                                                                                                                             |                                                       |                                                      |                          |
|-----------------------------------------------------------------------------------------------------------------------------------------------------------------------------------------------------------------|---------------------------------------------------------------------------------------------------------------------------------------------------------------------------------------------------------------------------------------------|-------------------------------------------------------|------------------------------------------------------|--------------------------|
|                                                                                                                                                                                                                 | Fasting<br>Other (SPECIFY _____)                                                                                                                                                                                                            | 1<br>1                                                | 2<br>2                                               |                          |
| If you said other, please specify                                                                                                                                                                               |                                                                                                                                                                                                                                             |                                                       |                                                      |                          |
| Je, kuna shughuli ambazo wewe <b>huchagua</b> kutofanya wakati wa hedhi?                                                                                                                                        | YES<br>NO                                                                                                                                                                                                                                   |                                                       | 1<br>2                                               | <b>843</b>               |
| Kama ndio, ni shughuli zipi?<br><br>[CHECK ALL THAT APPLY]                                                                                                                                                      | Going to school<br>Going to church/mosque<br>Going to market<br>Cooking for the family<br>Interacting with other family members<br>Interacting with neighbors<br>Interacting with men/boys<br>Playing games/sports<br>Other (SPECIFY _____) | YES<br>1<br>1<br>1<br>1<br>1<br>1<br>1<br>1<br>1      | NO<br>2<br>2<br>2<br>2<br>2<br>2<br>2<br>2<br>2      |                          |
| If you said other, please specify                                                                                                                                                                               |                                                                                                                                                                                                                                             |                                                       |                                                      |                          |
| Je, katika mwaka mmoja uliopita, kuna mtu ye yote ambaye amewahi kukutania kuhusu hedhi yako?                                                                                                                   | Yes<br>No                                                                                                                                                                                                                                   |                                                       |                                                      | <b>901</b>               |
| Je, ni nani ambaye alikutania kuhusu hedhi yako?<br><br>[CHECK ALL THAT APPLY]                                                                                                                                  | Brother<br>Sister<br>Other male relative<br>Other female relative<br>Male school mate<br>Female school mate<br>Other male friend<br>Other female friend<br>Teacher<br>Other (SPECIFY _____)                                                 | YES<br>1<br>1<br>1<br>1<br>1<br>1<br>1<br>1<br>1<br>1 | NO<br>2<br>2<br>2<br>2<br>2<br>2<br>2<br>2<br>2<br>2 |                          |
| If you said other, please specify                                                                                                                                                                               |                                                                                                                                                                                                                                             |                                                       |                                                      |                          |
| <b>SECTION 9: REPRODUCTIVE HEALTH KNOWLEDGE AND CONTRACEPTION</b>                                                                                                                                               |                                                                                                                                                                                                                                             |                                                       |                                                      |                          |
| Tafadali niambie kama taarifa zifuatazo ni kweli au la/sio kweli?<br><br>Je, uja uzito unaweza kutokea baada ya kubusu ama kukumbatiana?                                                                        | TRUE<br>FALSE<br>DON'T KNOW<br>NO RESPONSE                                                                                                                                                                                                  |                                                       | 1<br>2<br>88<br>96                                   |                          |
| Je, kunauwezekano kwa mwanamke kupata mimba <b>mara ya kwanza</b> anapofanya ngono?                                                                                                                             | TRUE<br>FALSE<br>DON'T KNOW<br>NO RESPONSE                                                                                                                                                                                                  |                                                       | 1<br>2<br>88<br>96                                   |                          |
| Wasichana hupitia mabadiliko ya kubalehe. Tafadhali unaweza kuniambia ni mabadiliko gani ya mwili ambayo wasichana hupitia wakati wanapotoka kwa hali ya kuwa watoto na kubalehe?<br><br>[CHECK ALL THAT APPLY] | Hair grows in different parts of body<br>Breasts develop<br>Acne appears<br>Menstruation starts<br>Rapid physical development<br>Voice Changes<br><br>Don't know                                                                            | YES<br>1<br>1<br>1<br>1<br>1<br>1                     | NO<br>2<br>2<br>2<br>2<br>2<br>2<br><br>98           |                          |
| Kati ya wakati mmoja wa kuwa na hedhi hadi wakati mwingine je, kuna siku fulani ambapo mwanamke ana uwezekano mkubwa zaidi wa kupata mimba akifanya ngono?                                                      | YES<br>NO<br>DON'T KNOW                                                                                                                                                                                                                     |                                                       | 1<br>2<br>88                                         | <b>906</b><br><b>906</b> |
| Je, wakati huo ni kabla tu ya hedhi yake kuanza, muda akiwa na hedhi, mara tu hedhi yake inapoisha, au wiki mbili baada ya hedhi yake?                                                                          | JUST BEFORE HER PERIOD BEGINS<br>DURING HER PERIOD<br>RIGHT AFTER HER PERIOD ENDS<br>HALFWAY BETWEEN TWO PERIODS<br>OTHER(SPECIFY _____)                                                                                                    |                                                       | 1<br>2<br>3<br>4<br>98                               |                          |
| Tafadhali niambie kama taarifa zifuatazo ni kweli au la/sio kweli<br><br>Kwa kawaida, hedhi/damu ya mwezi huja mara moja kwa mwezi<br><br>Kwa kawaida, hedhi/damu ya mwezi huja mara moja kwa mwezi             | TRUE<br>FALSE<br>DON'T KNOW                                                                                                                                                                                                                 |                                                       | 1<br>2<br>88                                         |                          |
| Ni afya bora kwa mwanamke kuwa na utofauti wa unyevunyevu kwa sehemu za uke wakati mmoja wa kuwa na hedhi hadi ule mwingine                                                                                     | TRUE<br>FALSE<br>DON'T KNOW                                                                                                                                                                                                                 |                                                       | 1<br>2<br>88                                         |                          |

|                                                                                                                                                                                                                                                                                                                              |                                                                                                                                                                                                                                  |                                                                             |                                             |
|------------------------------------------------------------------------------------------------------------------------------------------------------------------------------------------------------------------------------------------------------------------------------------------------------------------------------|----------------------------------------------------------------------------------------------------------------------------------------------------------------------------------------------------------------------------------|-----------------------------------------------------------------------------|---------------------------------------------|
| Wanawake na wasichana wanaweza kupata maambukizi kwenye sehemu za siri /uke hata kama hawajawahi kufanya ngono                                                                                                                                                                                                               | TRUE<br>FALSE<br>DON'T KNOW                                                                                                                                                                                                      | 1<br>2<br>88                                                                |                                             |
| Wanawake na wasichana wanaweza kuzuia maambukizi kwenye sehemu za siri /uke wakijipanguza sehemu za siri kwanzia mbele kwenda nyuma                                                                                                                                                                                          | TRUE<br>FALSE<br>DON'T KNOW                                                                                                                                                                                                      | 1<br>2<br>88                                                                |                                             |
| Je, ni mambo yapi msichana anaweza kukabiliana nayo akipata mimba akiwa kijana/tineja?<br><br>[CHECK ALL THAT APPLY]                                                                                                                                                                                                         | No problem<br>Health risk to mother<br>Health risk to baby<br>Education might get stopped<br>May not be able to continue working<br>May be forced to get married<br>Others(SPECIFY _____)<br>Don't know                          | YES<br>1<br>1<br>1<br>1<br>1<br>98<br>88<br>NO<br>2<br>2<br>2<br>2<br>2     |                                             |
| If you said other, please specify                                                                                                                                                                                                                                                                                            |                                                                                                                                                                                                                                  |                                                                             |                                             |
| Katika sheria ya Kenya, msichana anaweza kuolewa kuanzia miaka mingapi?                                                                                                                                                                                                                                                      | At age<br>Don't Know                                                                                                                                                                                                             | <input type="text"/><br>88                                                  |                                             |
| Je, ni nini ubaya wa msichana kuolewa mapema (kabla ya umri wa miaka 18) ?<br><br>[CHECK ALL THAT APPLY]                                                                                                                                                                                                                     | Risk to child at birth<br>Risk to Mother at deliver<br>Immature and incapable of raising children<br>Immature and incapable of running household<br>Unable to complete education<br>Ill health/Depression<br>Other<br>Don't know | YES<br>1<br>1<br>1<br>1<br>1<br>1<br>2<br>NO<br>2<br>2<br>2<br>2<br>2<br>98 |                                             |
| If you said other, please specify                                                                                                                                                                                                                                                                                            |                                                                                                                                                                                                                                  |                                                                             |                                             |
| Sasa nitakusomea baadhi ya taarifa. Tafadhali niambie kama unakubaliana ama haukubaliani nazo.                                                                                                                                                                                                                               |                                                                                                                                                                                                                                  |                                                                             |                                             |
|                                                                                                                                                                                                                                                                                                                              | <b>UNAKUBALIANA</b>                                                                                                                                                                                                              | <b>HAUKUBALIANI</b>                                                         | <b>DON'T KNOW</b>                           |
| a. Msichana ana haki ya kutafuta na kupokea habari kuhusu kujamiiana                                                                                                                                                                                                                                                         | 1                                                                                                                                                                                                                                | 2                                                                           | 88                                          |
| b. Msichana/ mwananke ana haki ya kuchagua atakayemuoa                                                                                                                                                                                                                                                                       | 1                                                                                                                                                                                                                                | 2                                                                           | 88                                          |
| c. Msichana/mwanamke ana haki ya kuamua ikiwa atapata watoto ama la                                                                                                                                                                                                                                                          | 1                                                                                                                                                                                                                                | 2                                                                           | 88                                          |
| d. Msichana ana haki ya kukataa kufanya ngono                                                                                                                                                                                                                                                                                | 1                                                                                                                                                                                                                                | 2                                                                           | 88                                          |
| e. Msichana ana haki ya kukataa ndoa ya lazima                                                                                                                                                                                                                                                                               | 1                                                                                                                                                                                                                                | 2                                                                           | 88                                          |
| f. Msichana/mwanamke ana haki ya kuamua wakati wa kupata watoto                                                                                                                                                                                                                                                              | 1                                                                                                                                                                                                                                | 2                                                                           | 88                                          |
| g. Msichana wa umri wangu ana haki ya kujua kuhusu mpango wa uzazi na njia za kuzuia mimba                                                                                                                                                                                                                                   | 1                                                                                                                                                                                                                                | 2                                                                           | 88                                          |
| h. Msichana/mwanamke ana haki ya kusisitiza kutumia njia za kuzuia mimba/kupanga uzazi na mume/mpenzi wake.                                                                                                                                                                                                                  | 1                                                                                                                                                                                                                                | 2                                                                           | 88                                          |
| Sasa ningependa kuongea kuhusu kupanga uzazi – njia au mbinu tofauti ambazo wenzi wanaweza kutumia ili kuchelewesha au kuzuia mimba.<br><br>Wewe umesikia kuhusu njia au mbinu zipi?<br><br>[FOR METHODS NOT MENTIONED SPONTANEOUSLY, ASK:<br>Je umewahi kusikia kuhusu(MBINU YA)?]<br><br>If NO to 914 (a - i), skip to 915 |                                                                                                                                                                                                                                  |                                                                             | <b>915</b><br>Je, umewahi kutumia [METHOD]? |
| a. KIDONGE/TEMBE: Wanawake wanaweza kumeza kidonge kila siku ili kuzuia mimba.                                                                                                                                                                                                                                               | YES, SPONT<br>YES, RECOG<br>NO                                                                                                                                                                                                   | 1<br>2<br>3                                                                 | YES<br>NO<br>1<br>2                         |
| b. IUD: Wanawake wanawekewa tanzi au pindi ndani yao na daktari au muuguzi.                                                                                                                                                                                                                                                  | YES, SPONT<br>YES, RECOG<br>NO                                                                                                                                                                                                   | 1<br>2<br>3                                                                 | YES<br>NO<br>1<br>2                         |
| c. MASINDANO: Wanawake wanaweza kudungwa sindano na mhudumu wa afya inayowazuia wasipate mimba kwa muda wa mwezi mmoja au zaidi.                                                                                                                                                                                             | YES, SPONT<br>YES, RECOG<br>NO                                                                                                                                                                                                   | 1<br>2<br>3                                                                 | YES<br>NO<br>1<br>2                         |
| d. VIDUDE VYA KUPACHIKWA: Wanawake wanaweza kupachikwa vidude kadhaa katika sehemu ya juu ya mikono                                                                                                                                                                                                                          | YES, SPONT<br>YES, RECOG                                                                                                                                                                                                         | 1<br>2                                                                      | YES<br>NO<br>1<br>2                         |

|                                                                                                                                                                                                                                 |                                                                                                                                                                                                                                                                                  |             |                                                                                  |                                                                   |
|---------------------------------------------------------------------------------------------------------------------------------------------------------------------------------------------------------------------------------|----------------------------------------------------------------------------------------------------------------------------------------------------------------------------------------------------------------------------------------------------------------------------------|-------------|----------------------------------------------------------------------------------|-------------------------------------------------------------------|
| yao na daktari au na muuguzi ambavyo vyaweza kuzuia mimba kwa mwaka mmoja au zaidi.                                                                                                                                             | NO                                                                                                                                                                                                                                                                               | 3           |                                                                                  |                                                                   |
| e. KONDOMU YA WANAUME: Wanaume wanaweza kuweka ala ya mpira kwenye uume wao ulio wima kabla ya kufanya ngono.                                                                                                                   | YES, SPONT<br>YES, RECOG<br>NO                                                                                                                                                                                                                                                   | 1<br>2<br>3 | YES<br>NO                                                                        | 1<br>2                                                            |
| f. KONDOMU YA WANAWAKE: Wanawake wanaweza kuingiza katika uke wao, kabla ya kufanya ngono, mpira mwembamba usio na rangi.                                                                                                       | YES, SPONT<br>YES, RECOG<br>NO                                                                                                                                                                                                                                                   | 1<br>2<br>3 | YES<br>NO                                                                        | 1<br>2                                                            |
| g. NJIA YA MWENDO: Kila mwezi ambapo mwanamke anatenda ngono yeye anaweza kuzuia mimba kwa kutofanya ngono katika siku za mwezi ambapo ana uwezekano mkubwa zaidi wa kupata mimba,                                              | YES, SPONT<br>YES, RECOG<br>NO                                                                                                                                                                                                                                                   | 1<br>2<br>3 | YES<br>NO                                                                        | 1<br>2                                                            |
| h. UONDOA UUME: Wanaume wanaweza kuondoa uume wao kutoka katika uke kabla ya kutokwa shahawa.                                                                                                                                   | YES, SPONT<br>YES, RECOG<br>NO                                                                                                                                                                                                                                                   | 1<br>2<br>3 | YES<br>NO                                                                        | 1<br>2                                                            |
| i. NJIA YA DHARURA YA KUDHIBITI UZAZI: Ikiwa hatua ya dharura, wanawake wanaweza kumeza vidonge hadi siku tatu baada ya kufanya ngono bila kujikinga ili kuzuia mimba. Vidonge hivyo huitwa pia "vidonge vya asubuhi ifuatayo." | YES, SPONT<br>YES, RECOG<br>NO                                                                                                                                                                                                                                                   | 1<br>2<br>3 | YES<br>NO                                                                        | 1<br>2                                                            |
| <b>CHECK Q707. IF NEVER HAD SEX, SKIP TO 922</b>                                                                                                                                                                                |                                                                                                                                                                                                                                                                                  |             |                                                                                  |                                                                   |
| Je, kwa sasa unafanya chochote au unatumia mbinu yoyote ya kuchelewesha au kuzuia mimba?                                                                                                                                        | NDIO<br>LA<br>NINA MIMBA KWA SASA                                                                                                                                                                                                                                                |             |                                                                                  | 1<br>2<br>3<br><b>919</b><br><b>919</b>                           |
| Unatumia njia gani?<br><br>[RECORD ALL MENTIONED]                                                                                                                                                                               |                                                                                                                                                                                                                                                                                  |             | YES NO                                                                           |                                                                   |
|                                                                                                                                                                                                                                 | a. TEMBE<br>b. KITANZI (COIL)<br>c. SINDANO<br>d. VIPANDIKIZI (IMPLANTS)<br>e. KONDOMU ZA WANAUME<br>f. KONDOMU ZA WANAWAKE<br>g. KUHESABU MASIKU/CALENDA<br>h. KUMWAGA SHAHAWA NJE<br>i. KUNYONYESHA<br>j. TEMBE ZA DHARURA<br>k. KUEPUKANA NA NGONO<br>i. INGINE (ELEZA _____) |             | 1 2<br>1 2 | <b>919</b><br><b>919</b><br><b>919</b><br><b>919</b>              |
| [ASK IF ANSWER YES TO PILL, IUD, INJECTABLES, IMPLANTS, MALE CONDOM, EMERGENCY CONTRACEPTIVES OR FEMALE CONDOM IN 723]<br><br>Ni wapi ulipokea [CURRENT METHOD] mara ya mwisho?                                                 | KLINIKA YA KIBINAFSI<br>HOSPITALI YA UMMA (SEREKALI)<br>KITUO CHA AFYA AU KLINIKA YA UMMA<br>ZAHANATI<br>DUKA LA DAWA<br>HUDUMA TAMBA (ZA KUZUNGUKA)<br>VITUO VISIVYO VYA SEREKALI<br>INGINE (ELEZA) .....                                                                       |             |                                                                                  | 1<br>2<br>3<br>4<br>5<br>6<br>7<br>98<br><b>ALL</b><br><b>922</b> |
| Je, unajua mahali ambapo unaweza kupata njia ya kupanga uzazi?                                                                                                                                                                  | NDIO<br>LA                                                                                                                                                                                                                                                                       |             |                                                                                  | 1<br>2<br><b>922</b>                                              |
| Ni wapi hapo?<br>Kuna mahali pengine?<br><br>[RECORD ALL MENTIONED]                                                                                                                                                             |                                                                                                                                                                                                                                                                                  |             | YES NO                                                                           |                                                                   |
|                                                                                                                                                                                                                                 | KLINIKA YA KIBINAFSI<br>HOSPITALI YA UMMA (SEREKALI)<br>KITUO CHA AFYA AU KLINIKA YA UMMA<br>ZAHANATI<br>DUKA LA DAWA<br>HUDUMA TAMBA (ZA KUZUNGUKA)<br>VITUO VISIVYO VYA SEREKALI<br>INGINE (ELEZA) .....                                                                       |             | 1 2<br>1 2<br>1 2<br>1 2<br>1 2<br>1 2<br>1 2<br>1 2                             |                                                                   |
| Je, umewahi kuzungumzia na <b>mama yako/mama mlezi</b> kuhusu afya ya uzazi ama maswala ya kujamiiana au mapenzi                                                                                                                | NO<br>YES<br>N/A                                                                                                                                                                                                                                                                 |             |                                                                                  | 1<br>2<br>9<br><b>925</b><br><b>925</b>                           |
| Je, ni yapi kati ya mambo ya hali ya uzazi ama maswala ya kujamiiana au mapenzi yafuatayo ambayo umewahi kuzungumzia?<br><br>[READ LIST; CHECK ALL THAT APPLY]                                                                  | MAWASILIANO<br>HADHI/KUJAMINI<br>UJA UZITO<br>KUBALEHE/JINSI WAVULANA NA WASICHANA WANAVY<br>HIV/AIDS<br>MAISHA YA NDOA/MAJUKUMU YA FAMILIA                                                                                                                                      |             | YES NO                                                                           |                                                                   |
|                                                                                                                                                                                                                                 |                                                                                                                                                                                                                                                                                  |             | 1 2<br>1 2<br>1 2<br>1 2<br>1 2<br>1 2                                           |                                                                   |

|                                                                                                                                                                                                                                         |                                                                                                                                                                                                                                   |                                                            |                                                                 |                                                                                                    |
|-----------------------------------------------------------------------------------------------------------------------------------------------------------------------------------------------------------------------------------------|-----------------------------------------------------------------------------------------------------------------------------------------------------------------------------------------------------------------------------------|------------------------------------------------------------|-----------------------------------------------------------------|----------------------------------------------------------------------------------------------------|
|                                                                                                                                                                                                                                         | HEDHI<br>MPANGO WA UZAZI<br>KUEPUKANA NA NGONO<br>AFYA NA USAFI<br>INGINE (ELEZA)                                                                                                                                                 | 1<br>1<br>1<br>1<br>98                                     | 2<br>2<br>2<br>2<br>98                                          |                                                                                                    |
| Je, ni nini ingine ulizungumzia kuhusu afya ya uzazi ama maswala ya kujamiiana au mapenzi? (ELEZA)                                                                                                                                      | _____ NONE=                                                                                                                                                                                                                       |                                                            | 0                                                               |                                                                                                    |
| Je, umewahi kuzungumzia na baba <u>yako/baba mlezi</u> kuhusu hali ya uzazi ama maswala ya kujamiiana au mapenzi miezi                                                                                                                  | NO<br>YES<br>N/A                                                                                                                                                                                                                  |                                                            | 1<br>2<br>9                                                     | 928<br>928                                                                                         |
| Je, ni yapi kati ya mambo ya afya ya uzazi ama maswala ya kujamiiana au mapenzi yafuatayo ambayo umewahi kuzungumzia?<br><br>[READ LIST; CHECK ALL THAT APPLY]                                                                          | MAWASILIANO<br>HADHI/KUJIAMINI<br>UJA UZITO<br>KUBALEHE/JINSI WAVULANA NA WASICHANA WANAVY<br>HIV/AIDS<br>MAISHA YA NDOA/MAJUKUMU YA FAMILIA<br>HEDHI<br>MPANGO WA UZAZI<br>KUEPUKANA NA NGONO<br>AFYA NA USAFI<br>INGINE (ELEZA) | YES<br>1<br>1<br>1<br>1<br>1<br>1<br>1<br>1<br>1<br>1<br>1 | NO<br>2<br>2<br>2<br>2<br>2<br>2<br>2<br>2<br>2<br>2<br>2<br>98 |                                                                                                    |
| Je, ni nini ingine ulizungumzia kuhusu afya ya uzazi ama maswala ya kujamiiana au mapenzi? (ELEZA)                                                                                                                                      | _____ NONE=                                                                                                                                                                                                                       |                                                            | 0                                                               |                                                                                                    |
| Wakati mwingine wanawake hupata utoko/unyevu usio wa kawaida na wenye harufu mbaya katika sehemu za siri. Je, umeshawahi kupata utoko usiowakawaida na wenye harufu mbaya kwa sehemu zako za siri katika miezi kumi na mbili iliyopita? | YES<br>NO<br>DON'T KNOW                                                                                                                                                                                                           |                                                            | 1<br>2<br>88                                                    |                                                                                                    |
| Wakati mwingine wanawake hupata uchungu wakati wanakojoa pamoja na haja ya kukojoa mara kwa mara. Je, katika miezi kumi na mbili iliyopita, umepata uchungu unapokojoa pamoja na haja ya kukojoa mara kwa mara?                         | YES<br>NO<br>DON'T KNOW                                                                                                                                                                                                           |                                                            | 1<br>2<br>88                                                    |                                                                                                    |
| Wakati mwingine wanawake hupata vidonda kwenye sehemu za siri. Je, umeshawahi kuwa na vidonda kwa sehemu zako za siri katika miezi kumi na mbili iliyopita?                                                                             | YES<br>NO<br>DON'T KNOW                                                                                                                                                                                                           |                                                            | 1<br>2<br>88                                                    |                                                                                                    |
| <b>Check 922, 923 &amp; 924. IF NO SYMPTOMS, GO TO FILTER</b>                                                                                                                                                                           |                                                                                                                                                                                                                                   |                                                            |                                                                 | <b>FILTER</b>                                                                                      |
| Ulitafuta matibabu kwa hizi dalili?                                                                                                                                                                                                     | YES<br>NO                                                                                                                                                                                                                         |                                                            | 1<br>2                                                          | 933                                                                                                |
| Kwa nini hukutafuta matibabu kwa hizi dalili?                                                                                                                                                                                           | 1 = Didn't know where to go<br>2 = No money for treatment<br>3 = Facility too far<br>4 = Symptoms cleared up by themselves<br>5 = Unfriendly staff<br>6 = Other (SPECIFY _____)                                                   |                                                            | 1<br>2<br>3<br>4<br>5<br>98                                     | <b>FILTER</b><br><b>FILTER</b><br><b>FILTER</b><br><b>FILTER</b><br><b>FILTER</b><br><b>FILTER</b> |
| Ni wapi ulitafuta ushauri ama matibabu mara ya mwisho ulipokuwa na hizi dalili?                                                                                                                                                         | PRIVATE CLINIC/HOSPITAL<br>PUBLIC HOSPITAL<br>PUBLIC HEALTH CENTER/CLINIC<br>DISPENSARY<br>CHEMIST/PHARMACY<br>MOBILE/OUTREACH SERVICE<br>NGO FACILITY<br>OTHER (SPECIFY) .....                                                   |                                                            | 1<br>2<br>3<br>4<br>5<br>6<br>7<br>98                           |                                                                                                    |
| <b>SECTION 10: PREGNANCY AND BIRTHS</b>                                                                                                                                                                                                 |                                                                                                                                                                                                                                   |                                                            |                                                                 |                                                                                                    |
| [IF NEVER HAD SEX) → Q1012]                                                                                                                                                                                                             |                                                                                                                                                                                                                                   |                                                            |                                                                 | 1012                                                                                               |
| <b>QUESTIONS</b>                                                                                                                                                                                                                        |                                                                                                                                                                                                                                   | <b>RESPONSES</b>                                           |                                                                 |                                                                                                    |
| Sasa ningependa kukuuliza kuhusu matukio ya kuzaa watoto ambao umekuwa nao muda wa maisha yako. Je, umewahi kuzaa mtoto?                                                                                                                | YES<br>NO                                                                                                                                                                                                                         |                                                            | 1<br>2                                                          | 1003                                                                                               |
| Je, umewahi kuzaa mvulana au msichana aliyezaliwa akiwa hai lakini aliyekufa baadaye?                                                                                                                                                   | YES<br>NO                                                                                                                                                                                                                         |                                                            | 1<br>2                                                          | 1005                                                                                               |
| Umezaa watoto mara ngapi kwa jumla maishani mwako?                                                                                                                                                                                      | TOTAL BIRTHS<br>[1-5]                                                                                                                                                                                                             |                                                            | <input type="text"/>                                            |                                                                                                    |



|                                                                                                                                                              |                                                                           |                                      |          |
|--------------------------------------------------------------------------------------------------------------------------------------------------------------|---------------------------------------------------------------------------|--------------------------------------|----------|
| Je wewe umewahi kupata mimba iliyotoka, au ambayo mtoto alizaliwa akiwa amekufa?                                                                             | YES<br>NO                                                                 | 1<br>2                               |          |
| Je, ulikuwa na miaka mingapi ulipozaa kwa mara ya kwanza?                                                                                                    | Age<br>Don't Know                                                         | <input type="text"/><br>88<br>[1-19] |          |
| Je una mimba wakati huu?                                                                                                                                     | YES<br>NO<br>UNSURE/DON'T KNOW                                            | 1<br>2<br>88                         | F3<br>F3 |
| Una mimba ya miezi mingapi?<br>[RECORD NUMBER OF COMPLETED MONTHS]                                                                                           | MONTHS<br>[0-10]<br>DON'T KNOW                                            | <input type="text"/><br>88           |          |
| [IF ALL OF 1001, 1002, 1005, AND 1007 = NO → 1012]                                                                                                           |                                                                           |                                      |          |
| Wakati wa kwanza kabisa ulipogundua una mimba, je, ulikuwa bado unaenda shuleni?                                                                             | YES<br>NO                                                                 | 1<br>2                               |          |
| Wakati wa kwanza kabisa ulipogundua una mimba, je, ulikuwa mseja, ulikuwa umechumbiwa au ulikuwa umefunga ndoa?                                              | SINGLE<br>ENGAGED<br>MARRIED                                              | 1<br>2<br>3                          |          |
| Wakati ulipopata mimba, je ulitaka kupata mimba, ulitaka kungoja mpaka baadaye, ama hukutaka hata kidogo kupata mimba?                                       | THEN<br>ONE TO TWO YEARS LATER<br>THREE OR MORE YEARS LATER<br>NOT AT ALL | 1<br>2<br>3<br>4                     |          |
| Nyakati nyingine msichana hupata mimba asipotaka kuipata. Je, wewe umewahi kupata mimba usipotaka kuipata?                                                   | YES<br>NO                                                                 | 1<br>2                               |          |
| Sasa niko na swali kuhusu maisha ya baadaye. Je, ungependa kupata mtoto/mtoto mwingine, ama ungependelea kutopata watoto/watoto wengine?                     | YES<br>NO<br>DON'T KNOW                                                   | 1<br>2<br>88                         | 1014     |
| Je, ungependa kupata mtoto/mtoto mwingine ukiwa na umri gan                                                                                                  | Age<br>Don't Know                                                         | <input type="text"/><br>88<br>[1-50] |          |
| Je, ukipata mimba saa hizi, unaweza kufurahi kiasi gani? Unaweza kusema, kufurahi kabisa, kufurahi kiasi, ama huwezi kufurahi                                | VERY HAPPY<br>SOMEWHAT HAPPY<br>NOT HAPPY AT ALL                          | 1<br>2<br>3                          |          |
| <b>SECTION 11: HIV/AIDS AND OTHER STIs</b>                                                                                                                   |                                                                           |                                      |          |
| <b>QUESTIONS</b>                                                                                                                                             |                                                                           | <b>RESPONSES</b>                     |          |
| Sasa ningependa kuongea kuhusu jambo jingine. Je, umewahi kusikia kuhusu ugonjwa unaoitwa UKIMWI?                                                            | YES<br>NO                                                                 | 1<br>2                               | #REF!    |
| Je watu wanaweza kupunguza uwezekano wa kupatwa na virusi vya UKIMWI kwa kuwa na mwenzi wa ngono mmoja tu asiyeambukizwa ambaye hana wenzi wengine wa ngono? | YES<br>NO<br>DON'T KNOW                                                   | 1<br>2<br>88                         |          |
| Je watu wanaweza kupata virusi vya UKIMWI kutokana na kuumwa na mbu?                                                                                         | YES<br>NO<br>DON'T KNOW                                                   | 1<br>2<br>88                         |          |
| Je watu wanaweza kupunguza uwezekano wa kupatwa na virusi vya UKIMWI kwa kutumia kondomu kila mara wanapofanya ngono?                                        | YES<br>NO<br>DON'T KNOW                                                   | 1<br>2<br>88                         |          |
| Je watu wanaweza kupata virusi vya UKIMWI kwa kushiriki chakula na mtu aliye na UKIMWI?                                                                      | YES<br>NO<br>DON'T KNOW                                                   | 1<br>2<br>88                         |          |
| Je watu wanaweza kupunguza uwezekano wa kupatwa na virusi vya UKIMWI kwa kutofanya ngono kamwe?                                                              | YES<br>NO<br>DON'T KNOW                                                   | 1<br>2<br>88                         |          |
| Je watu wanaweza kupata virusi vya UKIMWI kwa sababu ya uchawi au kwa njia nyingine isiyo ya kawaida?                                                        | YES<br>NO<br>DON'T KNOW                                                   | 1<br>2<br>88                         |          |
| Je, mtu anayeonekana kuwa na afya njema anaweza kuwa na                                                                                                      | YES                                                                       | 1                                    |          |

|                                                                                                                                                                                    |                                                                                                                                                                                                                                                                                                                                                                     |                                                                                     |              |
|------------------------------------------------------------------------------------------------------------------------------------------------------------------------------------|---------------------------------------------------------------------------------------------------------------------------------------------------------------------------------------------------------------------------------------------------------------------------------------------------------------------------------------------------------------------|-------------------------------------------------------------------------------------|--------------|
| virusi vya UKIMWI?                                                                                                                                                                 | NO<br>DON'T KNOW                                                                                                                                                                                                                                                                                                                                                    | 2<br>88                                                                             |              |
| Je virusi vinavyosababisha UKIMWI vyaweza kupitishwa kutoka kwa mama hadi kwa mtoto wake:<br><br>a. Wakati wa mimba?<br>b. Wakati wa kuzaa?<br>c. Kwa kunyonyesha?                 | a. DURING PREGNANCY<br>b. DURING DELIVERY<br>c. BREASTFEEDING                                                                                                                                                                                                                                                                                                       | YES NO DK<br>1 2 88<br>1 2 88<br>1 2 88                                             |              |
| Je, wafikiri uwezekano wako wa kupata virusi vya UKIMWI ni kidogo, kiasi au juu au huna uwezekano wowote wa kupata?                                                                | LOW<br>MEDIUM<br>HIGH<br>NO RISK<br>ALREADY INFECTED<br>DON'T KNOW                                                                                                                                                                                                                                                                                                  | 1<br>2<br>3<br>4<br>5<br>88                                                         | 1115         |
| Sitaki kujua matokeo uliyopata, kwa hivyo usiniambie, lakini je, umewahi kupimwa kuona kama una virusi vya UKIMWI?                                                                 | YES<br>NO                                                                                                                                                                                                                                                                                                                                                           | 1<br>2                                                                              | 1115         |
| Ni lini mara ya mwisho ulipopimwa?                                                                                                                                                 | LESS THAN 6 MONTHS AGO<br>LESS THAN 12 MONTHS AGO<br>12 - 23 MONTHS AGO<br>2 OR MORE YEARS AGO                                                                                                                                                                                                                                                                      | 1<br>2<br>3<br>4                                                                    |              |
| Mara ya mwisho ulipopimwa, je ni wewe mwenyewe uliyeomba kupimwa, ulipewa nafasi ya kupimwa ukakubali au kupimwa kulitakikana?                                                     | ASKED FOR THE TEST<br>OFFERED AND ACCEPTED<br>REQUIRED                                                                                                                                                                                                                                                                                                              | 1<br>2<br>3                                                                         |              |
| Sitaki kujua matokeo uliyopata, kwa hivyo usiniambie, lakini je, ulipata matokeo ya kupimwa?                                                                                       | YES<br>NO                                                                                                                                                                                                                                                                                                                                                           | 1<br>2                                                                              | 1116<br>1116 |
| Je, unajua mahali ambapo watu wanaweza kwenda kupimwa kwa ajili ya virusi vya UKIMWI?                                                                                              | YES<br>NO                                                                                                                                                                                                                                                                                                                                                           | 1<br>2                                                                              |              |
| Je, wewe binafsi wajua mtu aliye na au anayedhaniwa kuwa na virusi vya UKIMWI?                                                                                                     | YES<br>NO                                                                                                                                                                                                                                                                                                                                                           | 1<br>2                                                                              |              |
| <b>Sexually Transmitted Infections/Diseases</b>                                                                                                                                    |                                                                                                                                                                                                                                                                                                                                                                     |                                                                                     |              |
| Mbali na virusi vya ukimwi, unajua magonjwa mengine yoyote ambayo yanaweza kusambazwa kupitia kwa ngono?                                                                           | YES<br>NO<br>NO RESPONSE                                                                                                                                                                                                                                                                                                                                            | 1<br>2<br>96                                                                        | 1201<br>1201 |
| Je unaweza eleza dalili zozote ya magonjwa ya zinaa kwa wanawake?<br><br><b>DO NOT READ THE LIST. MORE THAN ONE ANSWER IS POSSIBLE. CIRCLE ALL THAT APPLY</b>                      | A. Abdominal pain<br>B. Genital discharge<br>C. Foul-smelling discharge<br>D. Burning pain on urination<br>E. Genital ulcers/sores<br>F. Genital warts<br>G. Swellings in the groin area<br>H. Itching<br>I. Other (SPECIFY) _____<br>J. Don't know                                                                                                                 | YES NO<br>1 2<br>1 2<br>1 2<br>1 2<br>1 2<br>1 2<br>1 2<br>1 2<br>1 2<br>1 2        |              |
| Je, unaweza kunielezea dalili zo zote za ugonjwa wa zinaa ambazo hutokea kwa wanaume?<br><br><b>DO NOT READ THE LIST. MORE THAN ONE ANSWER IS POSSIBLE. CIRCLE ALL THAT APPLY.</b> | A. Discharge from the penis<br>B. Discharge from the anus<br>C. Burning pain on urination<br>D. Genital ulcers/sores<br>E. Swellings in the groin area<br>F. Can't retract the foreskin<br>G. Ulcer/sores on the anus<br>H. Ulcers/sores on the penis<br>I. Ulcers/sores in the throat<br>J. Lower abdominal pain<br>K. Other (SPECIFY)..... _____<br>L. Don't know | YES NO<br>1 2<br>1 2 |              |
| Sasa nitakusomea baadhi ya taarifa kuhusu magonjwa ya zinaa na ningependa uniambie kama unakubali au haukubaliani nazo.                                                            |                                                                                                                                                                                                                                                                                                                                                                     |                                                                                     |              |
| Mtu anaweza kuwa na magonjwa ya zinaa bila kuonyesha dalili zozo                                                                                                                   | AGREE<br>DISAGREE<br>DON'T KNOW                                                                                                                                                                                                                                                                                                                                     | 1<br>2<br>88                                                                        |              |
| Magonjwa yote ya zinaa yanaweza tu kuambukizwa kupitia kwa ngor                                                                                                                    | AGREE<br>DISAGREE<br>DON'T KNOW                                                                                                                                                                                                                                                                                                                                     | 1<br>2<br>88                                                                        |              |

|                                                                                          |                                                                                                                                                                                                       |                                       |              |
|------------------------------------------------------------------------------------------|-------------------------------------------------------------------------------------------------------------------------------------------------------------------------------------------------------|---------------------------------------|--------------|
| Kondomu hukinga kutokana na magonjwa mengi ya zinaa                                      | AGREE<br>DISAGREE<br>DON'T KNOW                                                                                                                                                                       | 1<br>2<br>88                          |              |
| Je, umeshawahi kupata ama kushuku kwamba una ugonjwa wa zinaa katika miezi 6 iliyopita?  | YES<br>NO<br>NO RESPONSE                                                                                                                                                                              | 1<br>2<br>96                          | 1201<br>1201 |
| Ulitafuta matibabu kwasababu ya huo ugonjwa wa zinaa?                                    | YES<br>NO                                                                                                                                                                                             | 1<br>2                                | 1124         |
| Kwa nini hukutafuta matibabu kwa ugonjwa huo wa zinaa?                                   | 1 = Didn't know where to go<br>2 = No money for treatment<br>3 = Facility too far<br>4 = Symptoms cleared up by themselves<br>5 = Unfriendly staff<br>6 = Self medicated<br>7 = Other (SPECIFY _____) | 1<br>2<br>3<br>4<br>5<br>6<br>98      | ALL<br>1201  |
| Ni wapi ulitafuta ushauri ama matibabu mara ya mwisho ulipokuwa na huo ugonjwa wa zinaa? | PRIVATE CLINIC<br>PUBLIC HOSPITAL<br>PUBLIC HEALTH CENTER/CLINIC<br>DISPENSARY<br>CHEMIST/PHARMACY<br>MOBILE/OUTREACH SERVICE<br>NGO FACILITY<br>OTHER (SPECIFY) .....                                | 1<br>2<br>3<br>4<br>5<br>6<br>7<br>98 |              |

**SECTION 12: GBV/DOMESTIC VIOLENCE**

| QUESTIONS                                                                                                    | RESPONSES    |                 |                   |
|--------------------------------------------------------------------------------------------------------------|--------------|-----------------|-------------------|
| Nitasoma mfululizo wa taarifa kuhusu ndoa kisha ninataka uniambie kama unakubaliana au haukubaliani nazo.    |              |                 |                   |
|                                                                                                              | <b>AGREE</b> | <b>DISAGREE</b> | <b>DON'T KNOW</b> |
| a. Kama mwanamke kijana katika jamii hii angekuwa na umri wa miaka 25 bila kufunga ndoa, watu wangemheshimu. | 1            | 2               | 88                |
| b. Ni sawa kwa mwanamume kuipikia familia yake chakula.                                                      | 1            | 2               | 88                |
| c. Ndoa za wake wengi ni sehemu ya utamaduni wenu , basi zinapaswa kuendelea.                                | 1            | 2               | 88                |
| d. Ni bora zaidi kwa familia ya msichana kumpangia ndoa yake kuliko yeye mwenyewe kujichagulia.              | 1            | 2               | 88                |
| e. Mwanamume asipompiga mke wake, yamaanisha hampendi.                                                       | 1            | 2               | 88                |
| f. Ni haki ya mwanamume kufanya ngono na mke wake wakati wowote anapotaka.                                   | 1            | 2               | 88                |
| g. Mke anapaswa kuwa na uwezo wa kukataa kufanya ngono na mume wake. .                                       | 1            | 2               | 88<br>88          |
| h. Mume na mke wakikosa kukubaliana kuhusu kupanga uzazi, maoni ya mume yanapaswa kutangulizwa.              | 1            | 2               | 88                |
| i. Wasichana wa umri wangu wangukuwa washerati wangejua mahali pa kupata njia za kupanga uzazi               | 1            | 2               | 88                |

**ATTITUDES TOWARDS GENDER VIOLENCE**

Nitakuuliza ufikirie kuhusu hali kadhaa zinazohusisha mume na mke. Unapofikiria maswali hayo, tafadhali kumbuka kwamba tunakuuliza utoe maoni yako kuhusu kila moja ya hali hizo, wala si kuhusu mambo uliyoyapitia kibinafsi.

|                                                                                                                                                      |                     |     |    |
|------------------------------------------------------------------------------------------------------------------------------------------------------|---------------------|-----|----|
| Nyakati nyingine mume anakasirishwa na mambo ambayo mke wake anafanya. Kwa maoni yako, je, mume ana haki ya kumchapa mke wake katika hali zifuatazo: |                     | YES | NO |
| a. akienda mahali bila kumweleza?                                                                                                                    | a. GOES OUT         | 1   | 2  |
| b. akipuza kuwatunza watoto?                                                                                                                         | b. NEGLECT CHILDREN | 1   | 2  |
| c. akibishana naye?                                                                                                                                  | c. ARGUES           | 1   | 2  |
| d. akikataa kufanya ngono na yeye?                                                                                                                   | d. REFUSES SEX      | 1   | 2  |
| e. akiunguza chakula?                                                                                                                                | e. BURNS FOOD       | 1   | 2  |

|                                                            |       |   |
|------------------------------------------------------------|-------|---|
| Wakati mwingine watoto huwa wanajihisi kutokuwa salama ama | Often | 1 |
|------------------------------------------------------------|-------|---|

|                                                                                                                                                                                                                                   |                                            |              |                      |               |                   |                  |              |                      |
|-----------------------------------------------------------------------------------------------------------------------------------------------------------------------------------------------------------------------------------|--------------------------------------------|--------------|----------------------|---------------|-------------------|------------------|--------------|----------------------|
| kutishwa wakiwa shuleni, ama wakati wanaenda au kutoka shuleni. Je haya yamekufanyikia; mara kwa mara, wakati mwingine au kamwe?                                                                                                  | Sometimes                                  | 2            | 1206<br>1206<br>1206 |               |                   |                  |              |                      |
|                                                                                                                                                                                                                                   | Never                                      | 3            |                      |               |                   |                  |              |                      |
|                                                                                                                                                                                                                                   | Don't know                                 | 88           |                      |               |                   |                  |              |                      |
|                                                                                                                                                                                                                                   | Refused                                    | 96           |                      |               |                   |                  |              |                      |
| Je, ni nani huwa anakufanya uhisu kutokuwa salama ama kutishwa shuleni au unapoenda/ unapotoka shuleni (sio lazima useme jina lake)?<br><br><b>(CHECK ALL THAT APPLY)</b>                                                         |                                            | <b>YES</b>   | <b>NO</b>            |               |                   |                  |              |                      |
|                                                                                                                                                                                                                                   | A male teacher                             | 1            | 2                    |               |                   |                  |              |                      |
|                                                                                                                                                                                                                                   | A female teacher                           | 1            | 2                    |               |                   |                  |              |                      |
|                                                                                                                                                                                                                                   | A male students                            | 1            | 2                    |               |                   |                  |              |                      |
|                                                                                                                                                                                                                                   | A female students                          | 1            | 2                    |               |                   |                  |              |                      |
|                                                                                                                                                                                                                                   | A male who is not a student at your school | 1            | 2                    |               |                   |                  |              |                      |
|                                                                                                                                                                                                                                   | Other adults (SPECIFY)                     | 1            | 2                    |               |                   |                  |              |                      |
| Other things (example: dogs, other animals)                                                                                                                                                                                       | 1                                          | 2            |                      |               |                   |                  |              |                      |
| Wengine: Unahisi unatishwa na watu wagani wazima? _____                                                                                                                                                                           |                                            |              |                      |               |                   |                  |              |                      |
| Nyingine: Unahisi unatishwa na vitu gani zingine? _____                                                                                                                                                                           |                                            |              |                      |               |                   |                  |              |                      |
| Unaweza kuniambia ni wapi huwa unajihisi kutokuwa salama ama kutishwa ukiwa shuleni au unapoenda/unapotoka shuleni?<br><b>(CHECK ALL THAT APPLY)</b>                                                                              |                                            | <b>YES</b>   | <b>NO</b>            |               |                   |                  |              |                      |
|                                                                                                                                                                                                                                   | On the way to or from school               | 1            | 2                    |               |                   |                  |              |                      |
|                                                                                                                                                                                                                                   | In the school yard                         | 1            | 2                    |               |                   |                  |              |                      |
|                                                                                                                                                                                                                                   | In the classroom                           | 1            | 2                    |               |                   |                  |              |                      |
|                                                                                                                                                                                                                                   | In the school toilet or latrine            | 1            | 2                    |               |                   |                  |              |                      |
|                                                                                                                                                                                                                                   | Refused                                    | 1            | 2                    |               |                   |                  |              |                      |
|                                                                                                                                                                                                                                   | On the playing field                       | 1            | 2                    |               |                   |                  |              |                      |
| Other (SPECIFY) _____                                                                                                                                                                                                             | 1                                          | 2            |                      |               |                   |                  |              |                      |
| Je, kuna mtu ambaye unaweza kumwenda ili upate usaidizi ukihisi umetishwa ama hauko salama ukiwa shuleni au unapoenda/unapotoka shuleni?                                                                                          | YES                                        | 1            | 1208<br>1208         |               |                   |                  |              |                      |
|                                                                                                                                                                                                                                   | NO                                         | 2            |                      |               |                   |                  |              |                      |
|                                                                                                                                                                                                                                   | DON'T KNOW                                 | 88           |                      |               |                   |                  |              |                      |
| Ni watu gani unaweza kuwaenda ili upate usaidizi ukihisi hauko salama ama umetishwa ukiwa shuleni au unapoenda/unapotoka shuleni? <b>(CHECK ALL THAT APPLY)</b>                                                                   |                                            | <b>YES</b>   | <b>NO</b>            |               |                   |                  |              |                      |
|                                                                                                                                                                                                                                   | Mother                                     | 1            | 2                    |               |                   |                  |              |                      |
|                                                                                                                                                                                                                                   | Father                                     | 1            | 2                    |               |                   |                  |              |                      |
|                                                                                                                                                                                                                                   | Brother                                    | 1            | 2                    |               |                   |                  |              |                      |
|                                                                                                                                                                                                                                   | Sister                                     | 1            | 2                    |               |                   |                  |              |                      |
|                                                                                                                                                                                                                                   | Male friend                                | 1            | 2                    |               |                   |                  |              |                      |
|                                                                                                                                                                                                                                   | Female friend                              | 1            | 2                    |               |                   |                  |              |                      |
|                                                                                                                                                                                                                                   | Boyfriend                                  | 1            | 2                    |               |                   |                  |              |                      |
|                                                                                                                                                                                                                                   | Female teacher                             | 1            | 2                    |               |                   |                  |              |                      |
|                                                                                                                                                                                                                                   | Male teacher                               | 1            | 2                    |               |                   |                  |              |                      |
|                                                                                                                                                                                                                                   | Female mentor or coach                     | 1            | 2                    |               |                   |                  |              |                      |
|                                                                                                                                                                                                                                   | Male mentor or coach                       | 1            | 2                    |               |                   |                  |              |                      |
|                                                                                                                                                                                                                                   | Religious leader                           | 1            | 2                    |               |                   |                  |              |                      |
|                                                                                                                                                                                                                                   | Local administration                       | 1            | 2                    |               |                   |                  |              |                      |
|                                                                                                                                                                                                                                   | Other relative                             | 1            | 2                    |               |                   |                  |              |                      |
| Other nonrelative                                                                                                                                                                                                                 | 1                                          | 2            |                      |               |                   |                  |              |                      |
| Je, mwanamume yeyote amewahi kukufanyia yoyote kati ya mambo yafuatayo:<br>kama ndiyo, ni lini mara ya mwisho ilipotendeka: katika mwezi uliopita, katika miezi sita iliyopita, katika mwaka uliopita au zaidi ya mwaka uliopita? |                                            |              |                      |               |                   |                  |              |                      |
|                                                                                                                                                                                                                                   |                                            | <b>1208a</b> | <b>1208b</b>         | <b>1208c</b>  |                   |                  |              |                      |
|                                                                                                                                                                                                                                   |                                            | Ever Happen  | Relation to Male     | WHEN HAPPENED |                   |                  |              |                      |
|                                                                                                                                                                                                                                   |                                            | YES          | NO                   | Codes Below   | IN THE LAST MONTH | IN LAST 6 MONTHS | IN LAST YEAR | MORE THAN 1 YEAR AGO |
| A. Kusema au kufanya jambo la kukaibisha mbele ya watu wengine?                                                                                                                                                                   | 1                                          | 2            |                      | 1             | 2                 | 3                | 4            |                      |
| B. Kutisha kuumiza au kuumiza mtu aliye karibu na wewe?                                                                                                                                                                           | 1                                          | 2            |                      | 1             | 2                 | 3                | 4            |                      |
| C. Kkutukana au kukufanya uhisu vibaya juu yako mwenyewe?                                                                                                                                                                         | 1                                          | 2            |                      | 1             | 2                 | 3                | 4            |                      |
| D. Kukusukuma, kukutikisa au kukurushia kitu fulani?                                                                                                                                                                              | 1                                          | 2            |                      | 1             | 2                 | 3                | 4            |                      |
| E. Kukupiga kofi                                                                                                                                                                                                                  | 1                                          | 2            |                      | 1             | 2                 | 3                | 4            |                      |
| F. Kukunja mkono wako ay kuvuta nywele zako                                                                                                                                                                                       | 1                                          | 2            |                      | 1             | 2                 | 3                | 4            |                      |
| G. Kukupiga ngumi au kufanya jambo liwezalo kuumiza                                                                                                                                                                               | 1                                          | 2            |                      | 1             | 2                 | 3                | 4            |                      |
| H. Kukupiga teke, kukuvuta, au kukuchapa                                                                                                                                                                                          | 1                                          | 2            |                      | 1             | 2                 | 3                | 4            |                      |
| I. Kujaribu kukunyonga koo au kukuchoma kimakusudi                                                                                                                                                                                | 1                                          | 2            |                      | 1             | 2                 | 3                | 4            |                      |
| J. Kutisha kukushambulia na kisu au na silaha nyingine                                                                                                                                                                            | 1                                          | 2            |                      | 1             | 2                 | 3                | 4            |                      |
| K. Kukushambulia na silaha                                                                                                                                                                                                        | 1                                          | 2            |                      | 1             | 2                 | 3                | 4            |                      |
| L. Kukugusa kwa njia ya kingono (k.m. kukubusu, kukushika kwa nguvu, kukupapasa), usipotaka wafanye hivyo                                                                                                                         | 1                                          | 2            |                      | 1             | 2                 | 3                | 4            |                      |
| M. Kujaribu kufanya ngono na wewe usipotaka akakosa kufaulu                                                                                                                                                                       | 1                                          | 2            |                      | 1             | 2                 | 3                | 4            |                      |
| N. Kukulazimisha kwa nguvu kufanya ngono naye hata kama Kukulazimisha kufanya matendo ya kingono usipotaka                                                                                                                        | 1                                          | 2            |                      | 1             | 2                 | 3                | 4            |                      |
| RELATIONSHIP CODES FOR 1208b<br>1 = Husband                      6 = Neighbor                      11 = Co-worker                                                                                                                 |                                            |              |                      |               |                   |                  |              |                      |

|                                                                                                                                                                                                                                                                                                                                                                                    |  | 2 = Boyfriend<br>3 = Fiancé<br>4 = Friend, acquaintance<br>5 = Relative                                                                                                                                                                                                                                    | 7 = Fellow student<br>8 = Teacher<br>9 = Foreigner/tourist<br>10 = Employer | 12 = Parent/Guardian<br>13 = House guard<br>14 = House boy<br>15 = Stranger/unknown person<br>16 = Other ..... |                                                                                   |        |
|------------------------------------------------------------------------------------------------------------------------------------------------------------------------------------------------------------------------------------------------------------------------------------------------------------------------------------------------------------------------------------|--|------------------------------------------------------------------------------------------------------------------------------------------------------------------------------------------------------------------------------------------------------------------------------------------------------------|-----------------------------------------------------------------------------|----------------------------------------------------------------------------------------------------------------|-----------------------------------------------------------------------------------|--------|
| Unapofikiria yale ambayo umejionea miongoni mwa mambo tofauti ambayo tumekuwa tukizungumzia, je umewahi kujaribu kupata msaada ili wale watu waache au yule mtu aache kukufanyia mambo hayo tena?                                                                                                                                                                                  |  | YES<br>NO                                                                                                                                                                                                                                                                                                  |                                                                             |                                                                                                                | 1<br>2                                                                            | 1212   |
| Umejaribu kupata msaada kutoka kwa nani?<br><br>Kutoka kwa yeyote mwingine?<br><br>[RECORD ALL MENTIONED]                                                                                                                                                                                                                                                                          |  | OWN FAMILY<br>HUSBAND/PARTNER'S FAMILY<br>CURRENT/LAST/LATE HUSBAND/ PARTNER<br>CURRENT/FORMER BOYFRIEND<br>FRIEND<br>NEIGHBOR<br>RELIGIOUS LEADER<br>DOCTOR/MEDICAL PERSONNEL<br>POLICE<br>LAWYER<br>SOCIAL SERVICE ORGANIZATION<br>COMMUNITYLEADER/LOCAL ADMN L<br>TEACHER<br>OTHER<br><br>SPECIFY _____ |                                                                             | YES<br>NO                                                                                                      | 1<br>2<br>2<br>2<br>2<br>2<br>2<br>2<br>2<br>2<br>2<br>2<br>2<br>2<br>2<br>2<br>2 |        |
| Je, umewahi kuambia mtu yeyote mwingine kuhusu jambo hilo?                                                                                                                                                                                                                                                                                                                         |  | YES<br>NO                                                                                                                                                                                                                                                                                                  |                                                                             |                                                                                                                | 1<br>2                                                                            |        |
| Kadri ujuavyo, je, babako/mlezi aliwahi mpiga mamako/mlezi?                                                                                                                                                                                                                                                                                                                        |  | YES<br>NO<br>DON'T KNOW                                                                                                                                                                                                                                                                                    |                                                                             |                                                                                                                | 1<br>2<br>88                                                                      |        |
| <b>SECTION 13: Decision Making</b>                                                                                                                                                                                                                                                                                                                                                 |  |                                                                                                                                                                                                                                                                                                            |                                                                             |                                                                                                                |                                                                                   |        |
| Je, taarifa zifuatazo ni kweli kwako mara ngapi?                                                                                                                                                                                                                                                                                                                                   |  |                                                                                                                                                                                                                                                                                                            |                                                                             |                                                                                                                |                                                                                   |        |
|                                                                                                                                                                                                                                                                                                                                                                                    |  | Mara kwa mara                                                                                                                                                                                                                                                                                              | Wakati mwingine                                                             | Kamwe/Nadra                                                                                                    | Don't know                                                                        | Refuse |
| A. Wazazi wangu ama walezi wangu huniuliza maoni yangu kuhusu mambo                                                                                                                                                                                                                                                                                                                |  | 1                                                                                                                                                                                                                                                                                                          | 3                                                                           | 3                                                                                                              | 88                                                                                | 99     |
| B. Wazazi wangu ama walezi wangu husikiliza ninapotoa maoni yangu.                                                                                                                                                                                                                                                                                                                 |  | 1                                                                                                                                                                                                                                                                                                          | 3                                                                           | 3                                                                                                              | 88                                                                                | 99     |
| C. Marafiki zangu huwa wananiomba mawaidha wakiwa na shida                                                                                                                                                                                                                                                                                                                         |  | 1                                                                                                                                                                                                                                                                                                          | 3                                                                           | 3                                                                                                              | 88                                                                                | 99     |
| D. Nikiona kitu hakiko sawa shuleni ama mtaani nahisi kwamba ninaweza kumwambia mtu na atanisikiliza                                                                                                                                                                                                                                                                               |  | 1                                                                                                                                                                                                                                                                                                          | 3                                                                           | 3                                                                                                              | 88                                                                                | 99     |
| E. Ninaweza kuzungumza nikiona mtu mwingine akiumizwa                                                                                                                                                                                                                                                                                                                              |  | 1                                                                                                                                                                                                                                                                                                          | 3                                                                           | 3                                                                                                              | 88                                                                                | 99     |
| F. Ninaweza kuomba msaada kutoka kwa watu wazima nikiuhitaji                                                                                                                                                                                                                                                                                                                       |  | 1                                                                                                                                                                                                                                                                                                          | 3                                                                           | 3                                                                                                              | 88                                                                                | 99     |
| Je, unaweza kutoa maamuzi yafuatayo mwenyewe mara mingi kiasi gani bila mtu r                                                                                                                                                                                                                                                                                                      |  |                                                                                                                                                                                                                                                                                                            |                                                                             |                                                                                                                |                                                                                   |        |
|                                                                                                                                                                                                                                                                                                                                                                                    |  | Kamwe                                                                                                                                                                                                                                                                                                      | Wakati mwingine                                                             | Kamwe/Nadra                                                                                                    | Don't know                                                                        | Refuse |
| A. Ni nguo gani utavaa wakati hauko shuleni/kazini                                                                                                                                                                                                                                                                                                                                 |  | 1                                                                                                                                                                                                                                                                                                          | 3                                                                           | 3                                                                                                              | 88                                                                                | 99     |
| B. Ni nini utafanya wakati wako wa mapumziko                                                                                                                                                                                                                                                                                                                                       |  | 1                                                                                                                                                                                                                                                                                                          | 3                                                                           | 3                                                                                                              | 88                                                                                | 99     |
| C. Ni nini utakula wakati hauko nyumbani                                                                                                                                                                                                                                                                                                                                           |  | 1                                                                                                                                                                                                                                                                                                          | 3                                                                           | 3                                                                                                              | 88                                                                                | 99     |
| D. Kiasi cha elimu utakachopata (k.m. kumaliza shule ya upili, kwenda chuo kikuu)                                                                                                                                                                                                                                                                                                  |  | 1                                                                                                                                                                                                                                                                                                          | 3                                                                           | 3                                                                                                              | 88                                                                                | 99     |
| E. Ni nani unaweza kuwa marafiki naye                                                                                                                                                                                                                                                                                                                                              |  | 1                                                                                                                                                                                                                                                                                                          | 3                                                                           | 3                                                                                                              | 88                                                                                | 99     |
| F. Kuamu mwenyewe wakati wa kuolewa                                                                                                                                                                                                                                                                                                                                                |  | 1                                                                                                                                                                                                                                                                                                          | 3                                                                           | 3                                                                                                              | 88                                                                                | 99     |
| G. Kuamua mwenyewe mtu atakay kua                                                                                                                                                                                                                                                                                                                                                  |  | 1                                                                                                                                                                                                                                                                                                          | 3                                                                           | 3                                                                                                              | 88                                                                                | 99     |
| Je, unadhani kwamba utaweza kuamua mwenyewe wakati wa kuolewa?<br><b>IF MARRIED, ASK:</b> Je, uliweza kuamua mwenyewe wakati wa kuolewa?                                                                                                                                                                                                                                           |  | YES<br>NO<br>DON'T KNOW                                                                                                                                                                                                                                                                                    |                                                                             |                                                                                                                | 1<br>2<br>88                                                                      |        |
| Je, unadhani kwamba utaweza kuamua mwenyewe mtu atakaye kua?<br><b>IF MARRIED, ASK:</b> Je, uliweza kuamua mwenyewe mtu aliye kua?                                                                                                                                                                                                                                                 |  | YES<br>NO<br>DON'T KNOW                                                                                                                                                                                                                                                                                    |                                                                             |                                                                                                                | 1<br>2<br>88                                                                      |        |
| <b>END CAPI:</b> If you would like to discuss any of the questions or issues raised in this survey, please feel free to discuss this with the interviewer. The interviewer can provide information to contact a social welfare officer to discuss your concerns, or can contact the social welfare officer for you. Thank you very much for participating in this important study. |  |                                                                                                                                                                                                                                                                                                            |                                                                             |                                                                                                                |                                                                                   |        |
